# Supplementary material for: Inhibition of Abl Kinase by Imatinib Can Rescue the Compromised Barrier Function of 22q11.2DS Patient-iPSC-Derived Blood–Brain Barriers
Source: MDPI journal article supplement (doi:10.3390/cells12030422), 2023-01-27
Supplement: s1 [file s1]

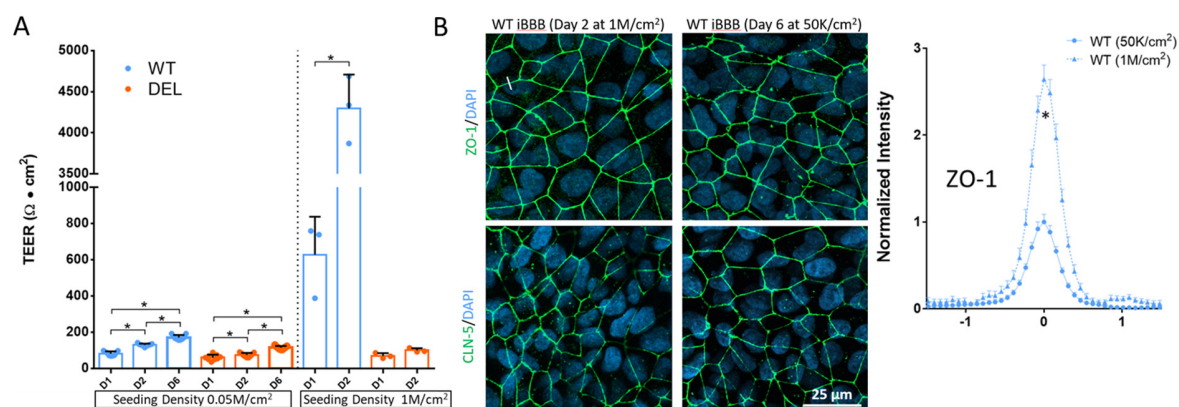

**Figure S1** (A) Effects of seeding density of HBMECs on the TEER of the iBBB. \*  $p < 0.05$ . Values are mean  $\pm$  SD. (B) Effects of seeding density on the expression of tight junction proteins ZO-1 and claudin-5 of WT iBBB. \*  $p < 0.05$ .

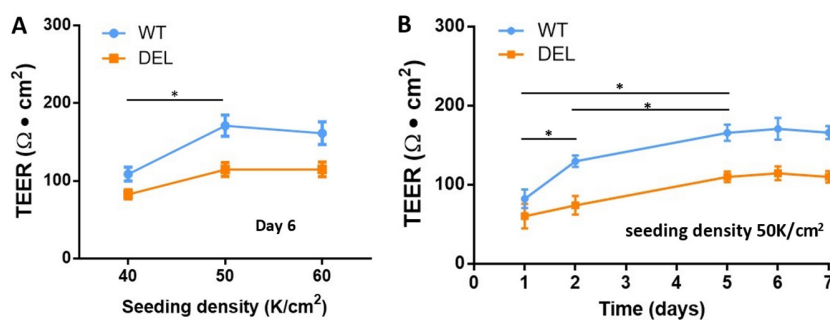

**Figure S2** (A) Effects of seeding density of HBMECs on the TEER of the iBBB and (B) Effects of culturing time on the TEER of the iBBB. \*  $p < 0.05$ . Values are mean  $\pm$  SD.

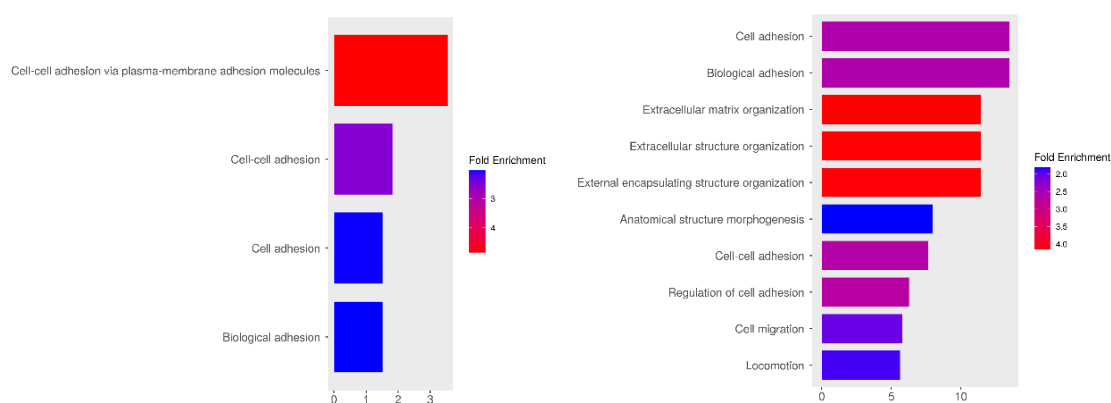

**Figure S3** GO terms that are enriched in downregulated (left) and upregulated (right) DEGs between 22q11.2DS and controls without imatinib treatment
