# Supplementary material for: Inhibition of Abl Kinase by Imatinib Can Rescue the Compromised Barrier Function of 22q11.2DS Patient-iPSC-Derived Blood–Brain Barriers
Source: Cells. 2023 Jan 27;12(3):422. doi: 10.3390/cells12030422 (PMC9913366; doi:10.3390/cells12030422)
Supplement: Supplementary file 1 [file cells-12-00422-s001.zip]

Archive with 4 entries (4 files):
- Figure S1-3.pdf
- Table S1_DEGs-r.xlsx
- Table S2_GO_enrichment_genotype.xlsx
- Table S3_GO_enrichment_imatinib.xlsx
