# Supplementary material for: Inhibition of Abl Kinase by Imatinib Can Rescue the Compromised Barrier Function of 22q11.2DS Patient-iPSC-Derived Blood–Brain Barriers
Source: Cells. 2023 Jan 27;12(3):422. doi: 10.3390/cells12030422 (PMC9913366; doi:10.3390/cells12030422)
Supplement: Supplementary file 1 [file cells-12-00422-s001.zip › Table S1_DEGs-r.xlsx]

## Sheet: deg_values_DESeq2_imatinib
symbol	ensembl_ID	User_ID	IMATINIB-CONTROL_logFC	IMATINIB-CONTROL_adjPval	Processed data:	XV001_S100_L002	XV002_S101_L002	XV003_S102_L002	XV004_S103_L002	XV005_S104_L002	XV006_S105_L002	XV007_S106_L002	XV008_S107_L002	XV009_S108_L002	XV010_S109_L002	XV011_S110_L002	XV012_S111_L002		overlap
NAB2	ENSG00000166886	NAB2	1.89797	2.04034e-21		8.98522	9.87398	8.54097	10.8246	8.52593	10.6413	8.7709	10.9403	8.19774	10.1769	8.38518	10.3402		#N/A
CDC14A	ENSG00000079335	CDC14A	0.883645	5.18929e-11		7.93996	8.53674	8.17333	9.10006	8.23174	8.96893	8.11461	9.18287	7.82931	8.70662	8.0693	9.0482		#N/A
FAM13B	ENSG00000031003	FAM13B	0.817934	1.29296e-10		8.94518	9.71755	9.33689	10.1197	9.16138	10.0709	9.51233	10.3949	9.19635	9.92769	9.17857	9.98771		#N/A
RBBP8NL	ENSG00000130701	RBBP8NL	-1.75438	3.26462e-10		7.31179	6.25395	8.42186	6.41828	8.02651	5.8993	7.68078	5.83171	7.61837	6.62155	7.93699	5.77488		#N/A
RARG	ENSG00000172819	RARG	-0.94399	7.82784e-10		8.62449	8.21495	9.21738	8.1165	9.26398	8.18949	9.11141	8.34149	9.14691	8.23856	9.30057	8.04115		#N/A
MIDN	ENSG00000167470	MIDN	1.08588	3.07782e-09		11.2719	11.9654	10.8347	12.3164	10.6361	12.0077	10.9592	12.0559	10.8499	11.71	10.617	11.6755		#N/A
LONRF2	ENSG00000170500	LONRF2	2.83341	3.16518e-09		4.33496	6.87996	4.58462	8.75046	6.97643	9.49408	6.41298	9.14963	5.6307	7.82142	4.21798	7.44393		#N/A
HMMR	ENSG00000072571	HMMR	-0.861226	3.16518e-09		9.17025	8.61333	9.3767	8.38661	9.59008	8.29931	9.64463	8.7726	9.21733	8.54643	9.24761	8.46612		#N/A
TNFAIP8L1	ENSG00000185361	TNFAIP8L1	-1.13708	4.41832e-09		7.2141	6.47335	7.71188	6.28367	8.10847	6.66943	7.80504	6.62108	7.36371	6.71587	7.48636	6.37417		#N/A
NR6A1	ENSG00000148200	NR6A1	-0.665185	9.84874e-09		9.97123	9.32283	10.118	9.33435	9.82638	9.16258	9.72392	9.1087	9.87892	9.18349	9.98425	9.42281		#N/A
SPATS2	ENSG00000123352	SPATS2	-0.439131	1.15748e-08		9.55866	9.05114	9.59312	9.2357	9.55228	9.07809	9.58521	9.19378	9.55721	9.05224	9.59667	9.18727		#N/A
GSDMB	ENSG00000073605	GSDMB	-0.522632	1.15748e-08		8.98192	8.51027	8.57378	8.08446	8.64479	8.26149	8.58925	7.99734	9.06363	8.48347	9.00255	8.43903		#N/A
HIVEP1	ENSG00000095951	HIVEP1	1.05458	1.38437e-08		10.5877	11.0436	10.3367	11.7477	10.3134	11.2602	10.3613	11.4946	9.97321	10.9866	10.264	11.564		#N/A
PHF13	ENSG00000116273	PHF13	0.600518	1.38437e-08		8.71457	9.2146	8.86643	9.72698	8.9382	9.53428	9.0246	9.59871	8.56157	9.21935	8.88363	9.27525		#N/A
PHF21A	ENSG00000135365	PHF21A	-0.683598	1.45957e-08		10.0861	9.41129	10.1786	9.25202	10.2524	9.64855	10.2563	9.76452	10.0733	9.45091	10.0253	9.21263		#N/A
CRY1	ENSG00000008405	CRY1	0.834888	1.86e-08		8.50105	9.00856	8.06466	9.32067	8.40141	9.15572	8.33678	9.28641	8.53507	9.00071	8.45358	9.44632		#N/A
TTC23	ENSG00000103852	TTC23	-0.711169	2.23727e-08		8.07595	7.5779	8.38946	7.56336	8.45541	7.65058	8.62678	7.72384	8.11071	7.67882	8.12489	7.42827		#N/A
WWTR1	ENSG00000018408	WWTR1	0.979277	3.55462e-08		9.87861	10.3292	9.34114	10.7506	9.20502	10.4791	9.29429	10.1535	9.39357	10.2992	9.43182	10.3743		#N/A
SGMS2	ENSG00000164023	SGMS2	2.50558	4.76744e-08		8.41084	9.42147	6.65986	10.3843	6.9898	10.0133	6.50381	9.1156	7.53392	9.54898	6.23698	9.1896		#N/A
LANCL2	ENSG00000132434	LANCL2	0.760451	4.76744e-08		7.71243	8.52545	8.20626	8.71427	8.02651	8.6654	8.30345	9.04263	7.44422	8.4007	7.59936	8.44682		#N/A
LATS2	ENSG00000150457	LATS2	0.991786	6.85664e-08		9.4292	9.79162	9.1988	10.4966	9.28582	10.2295	8.97254	10.3536	9.53231	10.2823	8.97721	10.18		#N/A
PHLPP2	ENSG00000040199	PHLPP2	0.716908	6.92314e-08		8.72643	9.20048	9.05642	9.92541	9.00227	9.86362	9.0297	9.45554	8.7662	9.59687	8.71554	9.46371		#N/A
FERMT2	ENSG00000073712	FERMT2	0.943165	8.91376e-08		10.3782	10.9553	9.78126	11.228	10.2059	11.1316	10.2121	10.8501	10.3688	10.9951	10.2458	11.5994		#N/A
ZSWIM6	ENSG00000130449	ZSWIM6	0.957527	1.5692e-07		10.2011	10.6627	9.78905	11.1904	10.2001	11.2466	9.98003	10.8411	9.72041	10.654	9.47524	10.5841		#N/A
AJUBA	ENSG00000129474	AJUBA	1.08103	1.81744e-07		9.99103	10.406	9.9323	11.4067	9.65025	10.7848	9.85621	11.2021	10.1119	10.8203	9.82167	11.09		#N/A
ARL4C	ENSG00000188042	ARL4C	0.63132	2.25811e-07		11.7866	12.1327	11.7399	12.6272	11.6663	12.3575	11.6517	12.3952	11.4668	11.9818	11.6166	12.2093		#N/A
NFKBID	ENSG00000167604	NFKBID	1.31536	2.25811e-07		6.83039	7.51084	7.03983	8.33988	6.1221	8.09232	6.74632	8.03666	6.7887	7.95118	7.09063	8.41539		#N/A
KDM6A	ENSG00000147050	KDM6A	0.95454	4.41153e-07		11.274	11.6488	10.7889	11.9507	10.9721	11.8611	10.7556	11.6394	10.9372	11.6741	10.523	12.209		#N/A
CHML	ENSG00000203668	CHML	0.461031	4.41153e-07		9.62563	10.1991	9.51642	10.2254	9.6999	10.1385	9.72077	10.0683	9.76527	10.1685	9.72258	10.0089		#N/A
TAF5L	ENSG00000135801	TAF5L	0.463251	4.41153e-07		8.71457	9.32283	8.82463	9.23205	8.7779	9.10325	8.76785	9.2555	8.7081	9.25434	8.7211	9.08362		#N/A
AGFG2	ENSG00000106351	AGFG2	1.23143	4.41153e-07		7.78226	8.16251	6.99745	8.75809	7.14126	8.58604	6.83062	7.92584	7.17069	8.395	7.15777	8.46228		#N/A
INO80	ENSG00000128908	INO80	0.665232	4.49927e-07		9.35474	9.70926	9.5332	10.1548	9.21928	9.91729	9.26862	9.90395	9.08205	9.90984	9.27433	10.097		#N/A
NFX1	ENSG00000086102	NFX1	0.666068	7.88088e-07		9.4508	9.83947	9.42945	10.329	9.16727	9.96119	9.35451	9.9523	9.3391	9.80859	9.27811	10.0682		#N/A
EGFL8	ENSG00000242038	EGFL8	1.50879	8.47368e-07		6.24147	7.15836	6.72623	8.7247	6.0727	7.85059	6.70863	8.05114	6.74313	7.92772	6.73156	8.15494		#N/A
ATP8B2	ENSG00000143515	ATP8B2	0.753835	8.74348e-07		10.0953	10.376	9.76399	10.7884	9.74001	10.5357	9.81837	10.4541	9.74374	10.3749	9.77965	10.8628		#N/A
PPT2	ENSG00000206256	PPT2	1.11546	9.90561e-07		8.42547	8.82137	8.42586	9.95672	8.07122	9.5103	7.93586	9.40947	8.28777	9.12967	8.12908	9.05331		#N/A
SYNJ2	ENSG00000078269	SYNJ2	1.64679	1.47512e-06		9.9762	10.6975	9.21275	11.1672	8.55321	10.8552	8.39331	10.5541	9.19635	10.3792	8.55979	10.474		#N/A
DENND4A	ENSG00000174485	DENND4A	1.20714	1.52562e-06		8.20021	8.85179	8.23845	10.0024	8.21476	9.90508	7.94669	9.04263	7.95953	8.83407	7.89825	8.83612		#N/A
BMP2K	ENSG00000138756	BMP2K	0.865176	1.52562e-06		8.361	8.97578	8.35211	9.2964	8.19181	9.18967	7.92494	8.63204	8.30747	9.04862	7.95126	9.05841		#N/A
ECT2	ENSG00000114346	ECT2	-0.437432	1.64952e-06		9.78532	9.44162	10.1118	9.64148	10.1233	9.61145	10.2166	9.82051	9.96455	9.59934	9.96563	9.44438		#N/A
NFATC2	ENSG00000101096	NFATC2	1.52011	1.7934e-06		7.75164	8.23355	7.3318	9.14735	7.37318	9.6607	6.89915	8.63204	7.84017	8.84245	7.80708	9.20346		#N/A
TCEANC2	ENSG00000116205	TCEANC2	-0.869002	1.7934e-06		8.31984	7.64893	8.44569	7.34411	8.65322	7.67955	8.75558	7.89407	8.15922	7.31894	8.54733	7.80692		#N/A
DUSP3	ENSG00000108861	DUSP3	0.685794	2.22167e-06		10.2716	10.4993	9.71089	10.69	9.94609	10.6103	9.60757	10.6081	10.1527	10.6705	9.85997	10.6147		#N/A
SIK2	ENSG00000170145	SIK2	0.592125	3.05646e-06		10.0122	10.1276	9.69772	10.5526	9.985	10.5837	9.8519	10.5608	9.68621	10.3038	9.77431	10.4295		#N/A
AGO1	ENSG00000092847	AGO1	-0.33802	3.41137e-06		11.205	10.7931	11.2585	10.8735	11.1116	10.8123	11.2895	10.9975	11.1464	10.8393	11.1655	10.8348		#N/A
ZNF609	ENSG00000180357	ZNF609	-0.450947	4.66744e-06		11.242	10.7962	11.4277	10.6632	11.3012	10.9622	11.3351	10.9831	11.0596	10.6939	11.1992	10.7539		#N/A
LRRC45	ENSG00000169683	LRRC45	-0.55084	7.34175e-06		8.35592	7.85525	8.31808	7.79877	8.46501	8.04859	8.23881	7.69954	8.43832	7.72492	8.48005	7.91199		#N/A
ZMYND8	ENSG00000101040	ZMYND8	-0.428422	7.77019e-06		10.8897	10.4702	11.2054	10.6323	11.2437	10.8814	11.3185	10.7263	10.7433	10.444	10.9114	10.592		#N/A
BUB1B	ENSG00000156970	BUB1B	-0.822254	8.36589e-06		9.9444	9.56612	10.592	9.55498	10.6614	9.60392	10.8144	10.0695	10.1914	9.38927	10.5853	9.69887		#N/A
ARHGEF19	ENSG00000142632	ARHGEF19	-1.06042	8.36589e-06		8.71059	7.87908	9.7417	8.61964	9.54097	8.19619	9.89728	9.01828	9.40824	8.395	9.4916	8.34625		#N/A
CLK1	ENSG00000013441	CLK1	0.634594	9.27718e-06		9.63824	10.6899	9.92384	10.5342	9.71809	10.1033	9.85046	10.4052	9.73212	10.3792	9.80474	10.2945		#N/A
HOMER1	ENSG00000152413	HOMER1	0.586596	9.59755e-06		9.00482	9.46936	9.21738	9.97102	9.31532	10.0526	9.45278	9.81062	8.9504	9.38066	9.12084	9.83723		#N/A
NR4A3	ENSG00000119508	NR4A3	2.22678	1.07639e-05		4.98821	6.19821	5.68945	8.38332	5.94124	7.40682	4.94313	7.25048	6.04164	7.67882	4.01567	7.56344		#N/A
ENSG00000286067	ENSG00000286067	ENSG00000286067	1.03719	1.07639e-05		7.54395	7.86124	7.07081	8.40618	6.9898	7.93308	6.50381	8.15753	7.54724	8.16021	7.27582	8.48517		#N/A
OCLN	ENSG00000273814	OCLN	0.947961	1.39219e-05		8.64962	9.10519	8.70135	9.90835	8.53508	9.51566	8.295	9.05705	8.32304	9.10896	8.12908	9.48468		OCLN
ZNF692	ENSG00000171163	ZNF692	-0.844487	1.6968e-05		8.72248	8.13308	9.42745	8.61684	9.39285	8.71753	9.33196	8.26076	9.24006	8.33682	9.5142	8.58741		#N/A
RACGAP1	ENSG00000161800	RACGAP1	-0.570741	1.76422e-05		9.32645	9.14012	9.83037	9.16852	9.92884	9.48043	9.91394	9.36768	9.66498	8.82985	9.74186	9.02235		#N/A
TOB2	ENSG00000183864	TOB2	0.706181	1.80545e-05		10.2526	11.1169	10.1425	11.0683	10.0374	10.9123	10.3633	10.9089	10.095	10.6372	10.0342	10.4412		#N/A
MB21D2	ENSG00000180611	MB21D2	1.00425	1.80545e-05		7.76703	8.08778	7.93033	9.13372	7.75621	8.73143	7.40252	8.61266	7.47938	8.36621	7.72644	8.9364		#N/A
CDC42EP4	ENSG00000179604	CDC42EP4	-0.783885	1.80545e-05		8.36606	7.90833	8.12002	7.49797	8.5577	7.56004	8.62678	7.64969	8.20195	7.36625	8.17437	7.41244		#N/A
AREG	ENSG00000109321	AREG	3.58604	1.81916e-05		5.866	7.9651	3.85531	8.94366	3.74189	8.04117	3.38682	6.18665	5.29403	6.88781	2.68593	6.49935		#N/A
SPEN	ENSG00000065526	SPEN	0.696906	1.82506e-05		11.4458	11.9341	11.448	12.463	11.6501	12.6203	11.4485	12.0664	11.4954	12.0626	11.7073	12.1838		#N/A
NRP1	ENSG00000099250	NRP1	1.72804	1.83234e-05		8.68246	9.68243	9.36007	11.9554	9.60536	11.3642	9.9561	11.2032	8.94789	10.8224	9.98656	11.5662		#N/A
NFKB1	ENSG00000109320	NFKB1	1.16448	1.8638e-05		8.98192	10.007	9.00388	10.2742	8.99234	10.9652	8.98047	9.78919	8.92257	9.31588	8.64416	9.8118		#N/A
SLC30A1	ENSG00000170385	SLC30A1	1.71002	1.92208e-05		8.99178	10.5051	9.03825	10.8481	8.24852	10.1898	7.88043	9.77763	8.82752	10.1685	7.49288	9.44438		#N/A
TRIQK	ENSG00000205133	TRIQK	-0.512061	2.49899e-05		9.13509	8.88454	9.37049	8.79568	9.67529	8.91718	9.36868	8.94267	9.12042	8.66467	9.26675	8.69602		#N/A
CDK18	ENSG00000117266	CDK18	-0.730339	2.49899e-05		8.87233	8.26555	8.42586	7.637	8.88195	8.1137	8.83936	8.23564	8.92001	8.06307	9.05852	8.32526		#N/A
MEX3C	ENSG00000176624	MEX3C	0.314441	2.67072e-05		10.4274	10.7852	10.4964	10.9615	10.6852	10.974	10.6942	10.9981	10.4927	10.6928	10.5078	10.7788		#N/A
LFNG	ENSG00000106003	LFNG	2.24085	2.67072e-05		5.35706	6.17914	5.02517	7.27482	3.74189	7.15516	4.42857	6.75678	5.2294	6.52063	3.14892	6.4224		#N/A
ZNF430	ENSG00000278780	ZNF430	0.731759	2.7253e-05		8.05102	8.58825	8.27882	9.49226	8.56218	8.95715	8.20762	8.91919	8.03237	8.90786	8.0995	8.6291		#N/A
TRAF4	ENSG00000076604	TRAF4	0.370602	2.73331e-05		10.763	11.0717	10.9579	11.3306	10.8718	11.3642	10.7815	11.2881	10.831	11.023	10.8751	11.2202		#N/A
MAP3K14	ENSG00000282637	MAP3K14	1.44853	2.83944e-05		7.86327	8.45188	6.60447	9.1647	6.93556	8.73603	6.91026	8.43275	7.4227	7.78707	6.90768	8.56968		#N/A
KLF4	ENSG00000136826	KLF4	1.0526	3.16464e-05		8.11256	9.00586	8.02302	9.61369	8.31376	9.03765	7.50136	8.74911	8.04651	8.93164	7.72644	8.58741		#N/A
FAM53B	ENSG00000189319	FAM53B	-0.570208	3.16464e-05		8.35082	7.95392	8.44175	7.78886	8.24295	7.85059	8.45152	7.76539	8.33076	7.76958	8.69873	8.04629		#N/A
DBP	ENSG00000105516	DBP	-1.86757	3.1894e-05		5.43622	3.14098	6.97579	5.00859	7.08007	4.83021	6.79509	5.87574	6.26765	4.31948	6.47935	5.00883		#N/A
CENPA	ENSG00000115163	CENPA	-0.862128	3.31436e-05		7.48932	6.73077	8.05952	7.01922	8.22044	7.37175	7.70011	6.75678	7.59931	7.16695	7.86348	6.86772		#N/A
KIAA0232	ENSG00000170871	KIAA0232	0.366176	3.80629e-05		10.3844	10.6541	10.5358	11.0409	10.5863	10.8969	10.6526	10.9338	10.5309	10.8403	10.3016	10.8176		#N/A
KNSTRN	ENSG00000128944	KNSTRN	-0.482114	3.88943e-05		8.75372	8.60621	9.15369	8.5771	9.12851	8.73603	9.32368	8.7813	8.99725	8.42882	9.03416	8.41936		#N/A
CENPE	ENSG00000138778	CENPE	-0.769542	4.53474e-05		9.54533	9.4031	10.3303	9.35632	10.3772	9.43303	10.5166	9.68167	10.1462	9.5592	10.33	9.30984		#N/A
CLK4	ENSG00000113240	CLK4	0.729869	4.53474e-05		7.87752	8.65188	8.02829	9.0491	8.18601	8.67022	8.18493	8.73424	8.29962	9.19663	8.40259	8.99338		#N/A
RC3H2	ENSG00000056586	RC3H2	0.377414	4.81905e-05		10.4455	10.8386	10.3888	10.7621	10.3001	10.7072	10.3119	10.7442	10.3211	10.7474	10.309	10.52		#N/A
FKRP	ENSG00000181027	FKRP	0.504589	4.81905e-05		8.79935	9.03267	8.58456	9.25021	8.42128	9.01131	8.52564	9.08076	8.55499	8.91979	8.59958	9.16854		#N/A
VEZF1	ENSG00000136451	VEZF1	0.487955	5.26971e-05		10.4715	10.6156	10.1217	10.9432	10.3424	10.9051	10.3883	10.8896	10.2156	10.5981	10.2782	10.7972		#N/A
RNF19A	ENSG00000034677	RNF19A	0.823216	5.26971e-05		9.37999	9.90913	8.70465	9.70607	8.92434	9.71066	8.40514	9.30867	8.88634	9.5387	8.67886	9.78131		#N/A
CXXC4	ENSG00000168772	CXXC4	-1.24322	5.26971e-05		7.57926	6.74381	9.33689	7.33052	8.95193	7.33582	9.05495	8.30572	8.39478	7.37783	8.52843	7.31361		#N/A
ZBTB2	ENSG00000181472	ZBTB2	0.47742	5.26971e-05		8.35082	8.77449	8.14934	8.61964	8.24852	8.73603	8.19405	8.8574	8.18075	8.60676	8.18648	8.52252		#N/A
GABRA4	ENSG00000109158	GABRA4	2.46641	5.79127e-05		3.84823	4.81281	2.96503	5.96965	2.91018	4.75963	3.5088	4.10755	3.05256	5.0562	2.8573	5.05034		#N/A
EP300	ENSG00000100393	EP300	0.279873	5.85943e-05		11.709	12.0613	12.0739	12.3073	11.913	12.2255	11.9876	12.2493	11.7816	12.0764	11.8866	12.1195		#N/A
PTPN14	ENSG00000152104	PTPN14	1.02468	6.56935e-05		11.2001	11.7231	10.4792	11.8958	10.2412	11.362	10.3192	11.0845	10.4623	11.5001	10.1304	11.4923		#N/A
CEP57L1	ENSG00000183137	CEP57L1	-0.663975	7.02695e-05		7.58795	7.06795	7.61711	6.7901	7.8024	7.15516	7.86338	7.2998	7.4227	6.95123	7.69853	6.83246		#N/A
AQP3	ENSG00000165272	AQP3	1.91065	7.3797e-05		5.13779	6.83192	5.93373	8.31938	5.7023	8.33007	5.64798	6.99501	5.4152	5.54152	3.78029	6.14428		#N/A
TPX2	ENSG00000088325	TPX2	-0.604572	7.53889e-05		11.3449	11.1118	11.8626	10.9599	11.9753	11.2263	11.7404	11.215	11.3121	10.8529	11.3278	10.5107		#N/A
TCF7	ENSG00000081059	TCF7	0.609895	8.39192e-05		9.45556	9.73071	8.83669	9.76158	8.95874	9.66312	9.13291	10.0028	9.37315	9.8632	9.5142	9.8882		#N/A
INO80D	ENSG00000283510	INO80D	0.423017	9.85801e-05		8.19453	8.84576	8.42186	8.808	8.25407	8.63122	8.37337	8.71921	8.28777	8.76955	8.42661	8.7058		#N/A
PIK3C2B	ENSG00000133056	PIK3C2B	-0.476965	9.9047e-05		9.15278	8.84576	9.32195	8.78326	9.26673	8.45259	9.29641	8.84083	9.29636	8.76955	9.18058	8.93085		#N/A
OTUD1	ENSG00000165312	OTUD1	1.11692	9.9047e-05		7.43253	8.20083	7.11111	8.01392	7.44289	8.68933	6.54717	7.94146	7.47242	8.56682	6.76425	7.98873		#N/A
MPP5	ENSG00000072415	MPP5	0.47363	0.000109393		9.6445	10.0444	9.77814	10.4424	9.66699	9.98266	9.68239	10.0742	9.68921	10.1193	9.65738	10.2328		#N/A
ITGB8	ENSG00000105855	ITGB8	2.02779	0.000114965		8.9384	9.83491	6.06262	9.69152	7.60804	10.1298	7.14473	9.33651	8.11519	9.57438	6.66389	8.97194		#N/A
SCAI	ENSG00000173611	SCAI	-0.758751	0.000114965		8.00632	7.44051	8.6544	7.67514	8.45058	7.66996	8.63685	7.88871	8.54174	7.99698	8.68172	7.86041		#N/A
TP53INP2	ENSG00000078804	TP53INP2	1.61436	0.000115664		9.79098	10.4284	7.85521	10.0786	8.18601	10.1016	8.08059	10.0444	8.56157	10.1399	7.58724	9.6218		#N/A
ERI1	ENSG00000104626	ERI1	1.04077	0.000119899		10.4902	10.71	9.79524	11.3259	9.60318	10.7781	9.45088	10.4331	9.88418	10.7772	9.49648	10.9606		#N/A
TXNIP	ENSG00000265972	TXNIP	-1.05863	0.000119899		10.7082	10.2086	10.6951	9.22288	11.3914	10.0209	11.1593	9.69095	10.4719	10.054	10.7609	9.58166		#N/A
ENSG00000254510	ENSG00000254510	ENSG00000254510	3.1674	0.000120604		3.59583	4.65611	2.30804	3.87449	2	4.52446	2.2995	4.54944	3.55266	5.1672	2	5.09069		#N/A
SKI	ENSG00000157933	SKI	0.41109	0.00012122		10.0738	10.4544	10.1498	10.7307	10.0958	10.6583	10.1467	10.5207	9.96827	10.3308	10.2544	10.4548		#N/A
SPATA2L	ENSG00000158792	SPATA2L	1.14886	0.000122095		7.07261	7.68993	7.15995	8.42549	6.66258	8.07062	6.41298	7.81147	6.51814	6.99703	6.35612	7.86041		#N/A
SRF	ENSG00000112658	SRF	0.540089	0.000122856		10.4739	10.6958	10.2826	10.732	10.3721	10.9305	10.1884	11.0087	10.3509	10.6141	10.1511	11.0394		#N/A
STPG1	ENSG00000001460	STPG1	-0.620523	0.000122856		7.59659	6.8681	7.63103	7.03607	7.58179	6.91651	7.57303	7.06324	7.44422	6.83835	7.10771	6.58659		#N/A
NIPAL1	ENSG00000163293	NIPAL1	1.01482	0.000124817		9.81154	10.3613	9.93089	11.5598	10.4503	11.2263	9.49583	10.7895	9.71009	10.4509	9.14999	10.362		#N/A
MAPK6	ENSG00000069956	MAPK6	0.388101	0.000132126		11.0934	11.392	11.0502	11.5554	11.2005	11.4232	11.1623	11.5669	10.9123	11.3435	10.7514	11.2236		#N/A
GBAP1	ENSG00000160766	GBAP1	-0.544325	0.000137032		7.91945	7.18729	7.61711	6.90463	7.56403	7.11331	7.44898	7.02465	7.63093	7.23223	7.59331	7.1514		#N/A
RASA2	ENSG00000155903	RASA2	0.807051	0.000145461		9.15278	9.59519	8.59525	9.97321	8.53508	9.53955	8.76785	9.09945	8.7888	9.69044	8.74586	9.39287		#N/A
SAMD4A	ENSG00000020577	SAMD4A	1.87177	0.000145652		9.18178	10.0325	7.94155	10.4526	7.66748	10.0544	6.60302	8.21007	9.02845	10.2543	7.93699	10.264		#N/A
ENSG00000230551	ENSG00000230551	ENSG00000230551	0.643248	0.000150444		8.24487	8.89918	8.15417	9.0491	8.00692	8.79015	8.34908	8.94784	8.78318	8.94727	8.39565	9.17794		#N/A
PTPN21	ENSG00000070778	PTPN21	0.650956	0.000156551		9.62351	9.97281	9.41342	10.1256	9.00557	9.81659	9.41817	10.1069	9.18787	9.73617	9.09966	9.92911		#N/A
FRYL	ENSG00000075539	FRYL	-0.426685	0.000156551		10.258	9.84856	10.1242	9.56518	10.3359	9.78806	10.2618	9.98156	10.1754	9.82773	10.1947	9.76738		#N/A
CSRNP2	ENSG00000110925	CSRNP2	0.66875	0.000166237		9.9562	10.6094	9.58061	10.6212	9.85406	10.4832	9.93177	10.5327	9.55061	10.3144	9.66028	9.93881		#N/A
USP28	ENSG00000048028	USP28	-0.707554	0.000177384		9.57842	9.00856	10.2378	9.52992	10.2482	9.49951	10.0216	9.2555	10.1733	9.50739	10.2175	9.48468		#N/A
KREMEN2	ENSG00000131650	KREMEN2	1.40726	0.000180225		6.83039	7.41628	5.76717	7.06919	5.85621	7.77209	5.449	6.98499	5.75069	7.05592	5.28173	7.00073		#N/A
IRF2BPL	ENSG00000119669	IRF2BPL	-0.743138	0.000208176		10.0907	9.94061	10.6817	9.63872	10.5786	9.58873	10.4909	9.65507	10.1208	9.62631	10.1072	9.05331		#N/A
OSGEPL1	ENSG00000128694	OSGEPL1	-0.693375	0.000215526		6.44657	5.97312	7.0911	6.45633	7.06752	6.3711	7.1541	6.35165	6.89669	6.11259	6.92706	6.37417		#N/A
HIVEP2	ENSG00000010818	HIVEP2	1.47383	0.000216915		11.1837	11.8871	9.67773	11.8215	10.2907	11.6765	9.55544	11.5886	10.1107	11.4106	9.19863	11.1208		#N/A
ZNF100	ENSG00000274746	ZNF100	0.622303	0.000218113		7.95348	8.61688	8.63034	9.45672	8.48875	8.88438	8.46288	9.1156	7.69216	8.50477	8.17031	8.48138		#N/A
FAM72B	ENSG00000188610	FAM72B	-1.09181	0.00022662		6.1967	5.5956	6.51718	5.89773	7.48125	5.64898	7.04743	5.76303	6.51814	5.93574	6.90768	5.84733		#N/A
ATXN1L	ENSG00000224470	ATXN1L	0.430498	0.000270383		10.3956	10.7257	10.1631	10.7563	10.262	10.614	10.0242	10.5768	10.1797	10.5218	10.1029	10.5088		#N/A
TJP1	ENSG00000277401	TJP1	0.852429	0.000286185		12.4331	12.899	12.3018	13.3764	11.9082	12.7081	11.6868	12.4467	12.095	12.9555	11.9385	13.0334		TJP1
NFAT5	ENSG00000102908	NFAT5	0.660948	0.000326329		11.0086	11.2968	11.1018	11.7673	11.0427	11.9578	10.9923	11.5981	11.209	11.8367	11.3223	12.0733		#N/A
MAPK1IP1L	ENSG00000168175	MAPK1IP1L	0.370154	0.000326329		11.1063	11.27	11.0201	11.4446	11.1139	11.5064	11.2102	11.6969	10.9467	11.2535	10.9779	11.411		#N/A
RFLNA	ENSG00000178882	RFLNA	-1.529	0.000326329		4.87912	3.96078	6.29029	4.57349	5.96851	3.75566	5.38672	4.79852	5.19597	4.58241	5.86742	4.01957		#N/A
IL6ST	ENSG00000134352	IL6ST	0.760679	0.000329466		10.8314	11.1478	9.66256	10.9365	10.3201	11.1559	9.89588	10.7678	10.3613	10.954	10.3255	11.0888		#N/A
SETX	ENSG00000107290	SETX	0.608	0.000332109		10.8649	11.2289	10.5002	11.5507	10.5405	11.3066	10.6352	10.9641	10.6683	11.0477	10.3924	11.1177		#N/A
SGO2	ENSG00000163535	SGO2	-0.861937	0.000332109		8.47317	8.12811	8.89845	7.71754	9.06992	7.94903	9.42206	8.61266	8.66293	7.91982	8.92276	7.93434		#N/A
FAM72D	ENSG00000215784	FAM72D	-1.65692	0.000332109		4.4153	4.12923	5.84092	4.26592	5.56613	4.83021	5.64798	4.37633	5.44396	3.87224	6.0014	3.26893		#N/A
APELA	ENSG00000248329	APELA	-1.68348	0.000332109		5.13779	3.55015	5.5202	3.94755	5.91345	4.02002	4.80707	3.77696	5.05391	4.73436	5.983	4.10084		#N/A
HABP4	ENSG00000130956	HABP4	0.714444	0.000352039		8.79935	9.13023	9.0921	10.0978	9.452	10.3058	9.17498	9.81062	9.01413	9.59438	9.05412	9.82233		#N/A
PIP5K1A	ENSG00000143398	PIP5K1A	0.668252	0.000391743		10.8286	10.9665	10.7487	11.9568	10.7416	11.5244	10.7747	11.2968	10.7331	11.2023	10.4811	11.2841		#N/A
SOX13	ENSG00000143842	SOX13	-0.647228	0.000392314		9.81709	9.60594	10.5938	9.81625	10.6318	9.58363	10.674	9.94715	10.1593	9.88163	10.1817	9.31411		#N/A
TIMM23B	ENSG00000204152	TIMM23B	0.87578	0.000418595		5.13779	6.30763	5.48995	6.55315	5.7966	6.11254	5.18191	6.32012	5.72748	6.45651	5.76347	6.35773		#N/A
BCAR1	ENSG00000285460	BCAR1	0.879701	0.000436963		11.3333	11.4384	10.6934	11.6809	10.8054	11.9204	10.2099	11.4525	11.0021	11.4848	10.5444	11.9564		#N/A
SIK3	ENSG00000160584	SIK3	0.693529	0.000460991		10.0661	10.2639	9.92807	10.9975	10.018	10.9952	9.81542	10.332	9.85769	10.5438	9.72397	10.3392		#N/A
ERF	ENSG00000105722	ERF	0.558771	0.000471609		10.4633	10.8768	10.396	10.8961	10.4036	11.129	10.5927	11.2468	10.0744	10.6717	10.5708	11.0335		#N/A
SPTAN1	ENSG00000197694	SPTAN1	0.586698	0.000495906		13.0658	13.3065	12.3545	13.2723	12.3127	13.0165	12.3212	12.7865	12.603	13.1096	12.545	13.2393		#N/A
TTPAL	ENSG00000124120	TTPAL	0.415225	0.000495906		9.31603	9.5157	8.95213	9.39765	8.97228	9.44151	8.9619	9.31468	9.05433	9.47269	8.84595	9.45987		#N/A
SNIP1	ENSG00000163877	SNIP1	0.422829	0.000520439		7.84162	8.28352	7.98557	8.44455	8.11458	8.22921	8.03055	8.5324	7.76236	8.395	7.90803	8.23363		#N/A
FAM83F	ENSG00000133477	FAM83F	-0.684629	0.000536883		8.66202	8.43991	9.11209	8.31938	8.91386	8.29307	8.69904	8.01221	9.14253	8.55156	9.09752	7.95087		#N/A
FAM131A	ENSG00000175182	FAM131A	0.942326	0.00054742		7.68837	7.68993	7.24391	8.63354	6.96294	8.26149	7.23587	8.28546	7.51371	7.94341	7.45334	8.65288		#N/A
IRS1	ENSG00000169047	IRS1	0.760226	0.000559603		10.0218	10.3506	9.6143	10.674	9.75575	10.8969	9.42011	10.2201	10.2778	10.8518	10.0185	10.5788		#N/A
TRMT1L	ENSG00000121486	TRMT1L	-0.523131	0.000559603		8.83995	8.39102	8.81246	8.36009	8.75068	8.31169	8.96989	8.36871	8.86257	8.53095	8.7862	7.90635		#N/A
TRA2A	ENSG00000164548	TRA2A	0.423565	0.000564428		10.5692	11.1485	11.0141	11.3855	10.8491	11.3004	11.121	11.517	10.8512	11.2793	10.9557	11.2976		#N/A
MEAF6	ENSG00000163875	MEAF6	0.383868	0.000571238		9.5183	9.75828	9.46681	10.0395	9.70599	10.1016	9.75353	9.98659	9.28448	9.78703	9.26865	9.6355		#N/A
JCAD	ENSG00000165757	JCAD	1.29173	0.000580276		9.89622	10.4081	8.06466	10.0998	8.38632	9.85518	7.51598	9.12019	9.39725	10.2962	8.56289	9.96889		#N/A
PLK1	ENSG00000166851	PLK1	-0.685452	0.000605342		9.4508	9.1475	9.87494	8.84671	10.1459	9.46388	10.1642	9.53492	9.62786	8.91979	9.95033	9.17325		#N/A
ESRRB	ENSG00000119715	ESRRB	2.63648	0.0006176		3.45087	4.12923	2.77744	4.78762	3.11927	5.19362	3.72559	4.97082	2	3.87224	2.49142	5.47297		#N/A
IP6K3	ENSG00000161896	IP6K3	-1.87549	0.00063201		4.87912	3.29064	4.64076	3.33562	5.41576	3.23767	4.60306	2.52735	4.71937	4.11312	4.55334	3.74403		#N/A
AURKA	ENSG00000087586	AURKA	-0.733564	0.000644625		9.20457	8.69616	9.45119	8.0011	9.46403	8.88023	9.34431	8.70708	9.22564	8.78704	9.18863	8.27362		#N/A
FBXO31	ENSG00000103264	FBXO31	0.537966	0.000650598		8.14826	8.47552	7.86113	8.61404	7.66748	8.38386	7.84033	8.2936	7.71003	8.31288	7.98862	8.32103		#N/A
STK40	ENSG00000196182	STK40	0.677452	0.000668293		10.1059	10.4722	9.59489	10.4744	9.88658	10.7936	9.81098	10.2392	9.78367	10.2048	9.39577	10.4721		#N/A
USP16	ENSG00000156256	USP16	0.449668	0.00067389		9.11719	9.36141	9.33264	9.97649	9.16433	9.6014	9.18645	9.71841	9.15345	9.4288	9.12295	9.62695		#N/A
IP6K1	ENSG00000176095	IP6K1	0.378364	0.000739223		9.27893	9.68918	9.44726	9.85475	9.2362	9.76121	9.40841	9.84978	9.19846	9.51265	9.46202	9.63209		#N/A
ARHGAP12	ENSG00000165322	ARHGAP12	0.707284	0.000747513		10.1075	10.3496	9.9725	11.0891	9.99663	11.0618	9.79758	10.3526	10.036	10.5579	9.87127	10.4967		#N/A
ELMOD3	ENSG00000115459	ELMOD3	-0.527352	0.00076364		7.71243	7.30632	8.05436	7.5221	7.87625	7.74495	8.11941	7.25882	7.98911	7.44547	7.95598	7.36387		#N/A
INPP1	ENSG00000151689	INPP1	0.876608	0.0007693		8.15413	8.39516	7.8373	8.97239	7.96014	9.06717	7.49399	8.16642	7.55385	8.44543	7.7209	8.77243		#N/A
FLT1	ENSG00000102755	FLT1	1.66734	0.000788892		7.50776	8.29242	5.10716	7.00217	4.58076	7.61104	4.23003	6.97491	6.79987	7.70665	7.64688	8.06666		#N/A
SLX4IP	ENSG00000149346	SLX4IP	-0.693584	0.000788892		7.81965	7.11888	8.04918	7.26771	7.70038	6.9002	8.07072	7.42363	7.88806	6.87151	7.34947	7.20752		#N/A
PLCXD1	ENSG00000182378	PLCXD1	-0.706708	0.00082781		9.15278	8.60977	9.47069	8.42549	9.4301	8.98061	9.61098	8.78708	8.81656	8.06307	9.37828	8.71551		#N/A
ENSG00000287670	ENSG00000287670	ENSG00000287670	-2.0173	0.00082781		4.69825	3.86855	6.04192	3.09955	5.33426	3.23767	5.32163	3.07258	4.57079	3.9977	4.27957	3.63911		#N/A
CKAP2L	ENSG00000169607	CKAP2L	-0.782739	0.000876013		8.24487	7.80637	9.2448	7.84253	9.02518	8.0111	9.27937	8.69791	8.64136	8.10551	8.66162	7.895		#N/A
CAMSAP1	ENSG00000130559	CAMSAP1	0.364797	0.000913168		10.3206	10.7379	10.3816	10.769	10.3644	10.8467	10.5961	10.7953	10.1484	10.455	10.1241	10.5144		#N/A
RPAP1	ENSG00000103932	RPAP1	-0.461114	0.000918424		9.27893	8.95911	9.36841	8.68786	9.14055	8.60126	9.40645	8.81844	9.28647	8.87552	9.39577	9.16854		#N/A
MINDY1	ENSG00000143409	MINDY1	-1.013	0.000938167		7.83433	7.44051	8.96318	7.87098	8.58439	6.97997	8.41297	7.77705	8.63825	7.48886	8.94431	7.8893		#N/A
KIAA0040	ENSG00000235750	KIAA0040	1.14064	0.000983021		9.48611	9.87694	8.97687	10.6086	9.20215	10.5291	8.2166	9.44826	9.00933	9.72487	8.98878	10.3794		#N/A
TMEM107	ENSG00000179029	TMEM107	-0.499726	0.00112137		7.2141	6.75673	7.58169	7.14104	7.6423	7.14134	7.47914	6.92339	7.2297	6.69749	7.01116	6.58659		#N/A
SUPT20H	ENSG00000102710	SUPT20H	-0.332678	0.00113576		10.4055	10.1837	10.5505	10.1769	10.5462	10.1263	10.4863	10.0384	10.5284	10.3662	10.4471	10.0745		#N/A
LCOR	ENSG00000196233	LCOR	0.368796	0.00117743		10.3259	10.7075	10.4481	10.8682	10.5439	10.8134	10.4525	10.9332	10.5292	10.955	10.3589	10.5734		#N/A
BTRC	ENSG00000166167	BTRC	-0.454094	0.00117959		9.5431	9.04852	9.60903	9.05737	9.86498	9.29324	9.72234	9.45009	9.63723	9.33977	9.53329	8.98538		#N/A
ENSG00000238018	ENSG00000238018	ENSG00000238018	0.775271	0.00117959		6.7552	7.23424	5.3622	6.32539	5.7966	6.27317	5.59387	6.82575	6.5971	7.02678	6.29778	7.1514		#N/A
RUBCN	ENSG00000145016	RUBCN	0.762456	0.00118873		8.11256	8.60621	7.53802	8.90061	7.89057	8.84657	7.7255	8.38403	7.88282	8.00448	7.8175	8.62568		#N/A
PPP2CA	ENSG00000113575	PPP2CA	0.296439	0.00119653		10.6451	10.6899	10.5551	10.9621	10.6603	10.8616	10.5987	10.9062	10.424	10.8745	10.4225	10.7857		PPP2CA
CENATAC	ENSG00000280975	CENATAC	0.763303	0.00119695		8.9885	9.37404	8.92412	9.996	8.74674	9.65585	8.56132	9.47177	9.40824	9.70431	8.60861	9.64908		#N/A
FAXDC2	ENSG00000170271	FAXDC2	-0.951439	0.0011983		7.47064	7.1968	8.78158	7.50404	8.35567	7.15516	8.56836	7.99235	8.17647	7.31894	8.676	7.39643		#N/A
SPTY2D1	ENSG00000179119	SPTY2D1	0.365831	0.00121722		8.82532	9.01664	9.03039	9.34791	8.93129	9.20636	8.85382	9.45554	8.8811	9.26062	8.75943	9.15433		#N/A
BRD1	ENSG00000100425	BRD1	0.34836	0.00122531		9.73729	10.1412	9.80909	10.3205	9.93749	10.2147	10.0707	10.3081	9.96703	10.3204	9.97264	10.2924		#N/A
SEMA3F	ENSG00000001617	SEMA3F	-0.646535	0.00123682		9.4292	9.07713	10.6018	9.68219	10.3001	9.81659	10.2844	9.80351	10.2219	9.51002	10.0117	9.20346		#N/A
ZNF142	ENSG00000115568	ZNF142	0.370829	0.00123682		9.02417	9.31193	8.90706	9.44573	9.02193	9.30568	9.13054	9.43729	8.86257	9.16354	9.00026	9.46755		#N/A
KLF16	ENSG00000129911	KLF16	0.828098	0.0013098		8.08211	8.46375	7.34875	8.61404	7.48125	8.34823	7.14473	8.07494	7.40818	7.86324	7.49288	8.44682		#N/A
ENSG00000287252	ENSG00000287252	ENSG00000287252	-1.6783	0.00132514		5.74685	4.20661	6.75194	4.78762	6.40758	4.96178	5.75046	3.77696	6.49083	5.62168	7.16595	5.61807		#N/A
KCTD13	ENSG00000174943	KCTD13	0.523837	0.00136846		8.1831	8.47161	7.97469	8.4477	8.18601	8.85929	8.11941	8.64164	7.79064	8.54643	8.25708	8.66963		#N/A
ATP6V0A1	ENSG00000033627	ATP6V0A1	0.538098	0.00137589		9.9992	10.0872	9.84389	10.5773	9.67942	10.5811	9.75044	10.3652	9.98549	10.1262	9.82037	10.5181		#N/A
MOSPD1	ENSG00000101928	MOSPD1	1.31238	0.00137589		8.7956	9.53083	8.52614	9.70344	9.0762	10.585	7.49399	9.4076	8.64136	9.815	7.7209	9.34363		#N/A
TTC37	ENSG00000198677	TTC37	-0.24091	0.00141936		10.7971	10.6367	10.7709	10.557	10.8054	10.4653	10.7709	10.4909	10.8566	10.648	10.7405	10.4958		#N/A
NCOA5	ENSG00000124160	NCOA5	0.467045	0.00141936		9.5806	10.0536	9.92242	10.0581	9.86679	10.4667	10.0229	10.6283	9.73066	10.0985	9.69177	10.2496		#N/A
TSPAN12	ENSG00000106025	TSPAN12	-0.57419	0.00144667		6.91573	6.48892	7.39844	6.99357	7.50938	6.85013	7.73177	7.21664	7.07278	6.45651	7.29085	6.57241		#N/A
SIK1B	ENSG00000275993	SIK1B	0.955577	0.00147144		7.2141	7.76859	6.08303	8.05583	6.82056	7.32364	6.39727	7.03439	7.12701	7.98945	6.6868	7.64021		#N/A
RELB	ENSG00000104856	RELB	1.71606	0.00153279		8.43513	8.70951	6.29029	8.5771	6.74373	9.5103	6.61665	8.66064	6.68407	7.99698	6.37034	8.46228		#N/A
NIP7	ENSG00000132603	NIP7	0.544633	0.00153279		8.65376	8.99499	8.35211	9.24116	8.69054	8.99988	8.31604	8.93228	8.27981	8.80861	8.63536	9.18494		#N/A
EFCAB7	ENSG00000203965	EFCAB7	-0.755266	0.00153279		7.32225	6.01675	7.37381	6.62173	7.15319	6.52796	7.7065	6.99501	7.28639	6.69749	7.29085	6.78407		#N/A
INCENP	ENSG00000149503	INCENP	-0.600644	0.00154223		9.83911	9.4356	10.299	9.40091	10.4515	9.84669	10.4553	9.94586	10.0371	9.31888	10.3099	9.80121		#N/A
NBAS	ENSG00000151779	NBAS	-0.423543	0.00154223		9.67746	9.5176	9.75607	9.28587	9.91314	9.19303	9.79758	9.21322	9.65886	9.50739	9.66461	9.20346		#N/A
GRAMD4	ENSG00000075240	GRAMD4	-0.477638	0.00160665		9.26273	8.9619	9.79215	9.12193	9.42273	9.03765	9.5625	9.41694	9.45845	8.87143	9.52536	8.76622		#N/A
TRERF1	ENSG00000124496	TRERF1	-0.767713	0.00160665		9.07761	8.09797	8.87523	7.78886	8.94165	8.27421	9.16109	8.6825	8.44545	7.69744	8.61758	7.93987		#N/A
CEP63	ENSG00000182923	CEP63	-0.365671	0.00160665		8.92817	8.64842	9.20579	8.76063	9.22776	8.54467	9.18873	8.81562	8.93528	8.77832	8.9632	8.7058		#N/A
HJURP	ENSG00000123485	HJURP	-0.567669	0.00164166		8.97531	8.71614	9.59844	8.82021	9.76355	9.21297	9.85765	9.2555	9.26446	8.70662	9.54744	8.94192		#N/A
GPR1	ENSG00000283448	GPR1	-1.71637	0.00164338		4.5637	3.14098	6.51718	4.82688	5.4929	3.89388	5.06745	4.37633	5.2294	3.58292	5.62797	4.17778		#N/A
METRNL	ENSG00000275031	METRNL	0.896584	0.00164987		8.17158	8.93941	8.92695	10.0938	8.45058	9.6607	8.63015	9.36768	9.09797	9.51265	8.45023	9.53124		#N/A
DENND4C	ENSG00000137145	DENND4C	-0.465801	0.00164987		9.8518	9.52517	10.2737	9.61369	10.2173	9.72694	9.94669	9.46277	10.036	9.81713	10.2086	9.63209		#N/A
CKAP5	ENSG00000175216	CKAP5	-0.314267	0.00168069		11.8842	11.7613	11.9835	11.6392	12.1361	11.6553	12.1233	11.8122	11.8507	11.6432	11.9244	11.4947		#N/A
CASKIN2	ENSG00000177303	CASKIN2	0.485503	0.00168069		8.42061	8.96469	8.3352	9.088	8.62351	9.20636	8.81296	9.22603	8.45608	8.58693	8.46024	8.9197		#N/A
TK2	ENSG00000166548	TK2	-0.526667	0.00168069		7.16846	6.63604	7.39028	6.58785	7.09252	6.86701	7.1541	6.69667	7.39351	6.87151	7.22193	6.77171		#N/A
PSRC1	ENSG00000134222	PSRC1	-0.804107	0.00168439		8.74598	8.48332	9.49754	8.31248	9.44474	8.81211	9.73177	9.04986	9.24824	8.2575	9.70305	8.71551		#N/A
ENSG00000280173	ENSG00000280173	ENSG00000280173	1.01629	0.00168439		4.82131	5.23834	4.6948	6.16613	4.35142	5.68751	4.98577	5.93937	4.81056	5.54152	4.82525	5.34538		#N/A
EPGN	ENSG00000182585	EPGN	2.93013	0.00168492		2.3662	3.42622	4.03364	6.62173	3.60958	6.05476	2.2995	3.86697	2.71767	5.66014	3.27524	4.51081		#N/A
SURF2	ENSG00000281024	SURF2	0.604587	0.00174103		7.52597	7.76859	7.27084	7.93975	7.14126	7.88415	7.3707	7.6934	7.04489	7.67882	7.32776	8.2246		#N/A
MED13L	ENSG00000123066	MED13L	-0.279051	0.00177155		11.4506	11.1764	11.4747	11.0992	11.4293	11.1403	11.4191	11.1825	11.6361	11.435	11.5608	11.2638		#N/A
SLC45A3	ENSG00000158715	SLC45A3	-0.694507	0.00177155		7.69644	7.29751	7.35715	6.13519	7.16502	6.83304	7.40252	6.88081	7.71594	6.75194	7.8884	7.1514		#N/A
SPG11	ENSG00000104133	SPG11	-0.233499	0.00178946		10.2039	10.0138	10.2837	10.1088	10.3424	9.95923	10.2065	10.0102	10.226	10.0007	10.2293	9.99171		#N/A
SMTNL2	ENSG00000188176	SMTNL2	-1.64235	0.00182247		6.21926	5.34487	8.60587	6.55315	8.13879	6.66943	7.47166	5.69092	6.65975	5.62168	8.23393	6.52902		#N/A
PRAG1	ENSG00000275342	PRAG1	0.729614	0.00182397		11.1266	11.4293	10.9272	11.7012	10.345	11.0801	10.3357	11.3572	10.9942	11.5668	10.4319	11.4961		#N/A
TTK	ENSG00000112742	TTK	-0.514057	0.00184524		9.11117	8.84273	9.62478	8.90978	9.59227	8.92122	9.75507	9.35801	9.30423	8.82985	9.55835	9.00926		#N/A
E2F6	ENSG00000169016	E2F6	0.510895	0.00184956		7.89163	8.0304	7.63103	8.53029	8.00692	8.35423	7.96279	8.4763	7.45839	8.27	7.70976	8.036		#N/A
PARD6B	ENSG00000124171	PARD6B	0.842918	0.00189401		7.31179	7.66273	7.52316	8.65279	7.62527	8.14172	7.27937	8.32173	7.2297	7.99698	7.71534	8.69275		PARD6B
EEF2K	ENSG00000284161	EEF2K	-0.471416	0.00189401		8.51023	8.33612	8.44963	7.8037	8.41138	8.03371	8.41687	7.85061	8.34608	7.85497	8.52525	7.93987		#N/A
FGF18	ENSG00000156427	FGF18	1.66137	0.00191833		3.72754	5.12332	3.6518	6.02134	4.26609	5.76161	4.98577	5.83171	3.32417	4.58241	3.01047	3.63911		#N/A
SLC7A1	ENSG00000139514	SLC7A1	0.971657	0.00192985		10.9491	11.3832	9.06671	10.3502	9.86498	11.1395	9.57477	10.4659	10.3065	11.1262	9.82296	11.1183		#N/A
PSPC1	ENSG00000121390	PSPC1	0.575951	0.00194996		10.1029	10.5484	10.7066	11.4843	10.6738	11.2855	10.4657	10.9267	10.2878	10.7407	10.4571	11.0831		#N/A
CXADR	ENSG00000154639	CXADR	0.58687	0.00194996		10.1359	10.4375	9.88078	10.6773	9.87222	10.742	10.3784	10.9806	10.2828	10.6904	9.85997	10.4538		#N/A
DNAJC22	ENSG00000178401	DNAJC22	1.23622	0.00196868		4.93469	5.47567	3.94723	5.39561	4.43199	6.14058	4.85386	6.13323	4.85407	6.1935	5.34071	5.77488		#N/A
CEP290	ENSG00000198707	CEP290	-0.514005	0.00197547		9.88568	9.18144	9.78438	9.1298	9.67736	9.08532	9.93585	9.41134	9.72774	9.56174	9.54587	9.08861		#N/A
ELL2	ENSG00000118985	ELL2	1.49939	0.00200269		10.5757	11.1872	9.13426	11.3169	9.53642	11.2698	8.20762	10.4331	9.74807	10.5668	8.55669	10.6682		#N/A
NAB1	ENSG00000138386	NAB1	0.752803	0.00201007		9.78154	9.92066	9.72719	11.0724	9.66699	10.6302	9.68563	10.689	9.86303	10.2338	10.042	10.6095		#N/A
CKAP2	ENSG00000136108	CKAP2	-0.472888	0.00207193		10.5246	10.3843	10.9941	10.1088	11.0854	10.4928	11.0143	10.4971	10.5013	10.3129	10.6804	10.1469		#N/A
EGR2	ENSG00000122877	EGR2	-2.02963	0.00207193		5.31579	5.9951	8.69474	6.02134	9.1072	5.56869	8.18493	7.15544	7.94451	6.73402	8.39217	4.92204		#N/A
DNAJC25	ENSG00000059769	DNAJC25	0.555614	0.00207471		6.83039	7.51845	7.56728	7.93975	7.26737	7.78991	7.23587	7.96203	7.33328	7.90388	7.27582	7.73236		#N/A
BRAF	ENSG00000157764	BRAF	0.380824	0.00209177		8.81054	9.18861	8.76273	9.31377	8.95534	9.49136	8.88513	9.27823	8.89679	9.0985	9.03416	9.25097		#N/A
PDS5A	ENSG00000121892	PDS5A	-0.284118	0.00211084		11.0587	10.8901	11.0095	10.719	11.0515	10.6583	11.1576	10.7119	10.9672	10.833	10.9826	10.7108		#N/A
MFN2	ENSG00000116688	MFN2	0.302009	0.00211084		10.5212	10.7485	10.52	10.7815	10.4551	10.8025	10.4061	10.7435	10.4122	10.5335	10.2848	10.788		#N/A
SEH1L	ENSG00000085415	SEH1L	0.742562	0.00211093		8.53292	8.87568	8.63725	9.79042	8.81593	9.34538	8.91578	9.54006	8.6568	9.21613	8.87118	9.89106		#N/A
SPAG1	ENSG00000104450	SPAG1	1.25599	0.00228867		8.08825	8.84576	6.61852	8.50933	7.50006	8.68458	6.56134	7.81147	7.16206	8.58693	6.7205	7.82497		#N/A
BTN3A2	ENSG00000186470	BTN3A2	-0.832566	0.00228867		7.18	6.59346	7.23482	6.50555	7.55506	6.22159	7.3707	6.36715	6.9478	6.21949	7.62332	7.08304		#N/A
AHCYL2	ENSG00000158467	AHCYL2	-0.468412	0.00229258		8.77672	8.21495	8.8094	8.04338	9.0154	8.52884	8.74941	8.55627	8.76335	8.33682	8.69308	8.31678		#N/A
CCDC68	ENSG00000166510	CCDC68	1.17556	0.00229258		6.84497	7.51845	5.93373	7.6965	5.66944	6.81575	5.91396	6.45685	6.40566	7.57191	5.57982	6.94679		#N/A
TTC33	ENSG00000113638	TTC33	-0.511788	0.00236875		7.95348	7.33245	8.18754	7.6965	8.42621	7.69854	8.52202	7.95692	7.80734	7.73396	8.09094	7.56344		#N/A
CFAP57	ENSG00000243710	CFAP57	1.38048	0.00238943		4.98821	5.90511	5.99961	7.23159	4.83894	5.96351	5.4182	6.00031	4.21794	6.36632	4.50258	6.00343		#N/A
ZNF598	ENSG00000167962	ZNF598	0.351016	0.00245783		9.11719	9.32933	8.86937	9.36635	8.94165	9.17957	8.93222	9.39063	8.89158	9.15683	9.0252	9.41091		#N/A
TRMT6	ENSG00000089195	TRMT6	0.533663	0.00254301		8.76527	8.9619	8.41383	9.18372	8.59754	9.02266	8.73386	9.06182	8.30355	8.80002	8.33529	9.28832		#N/A
LRRC4	ENSG00000128594	LRRC4	1.80401	0.00254503		7.77467	8.65188	5.68945	8.34665	6.28279	8.65572	6.10015	7.97727	7.73353	8.98185	5.05395	7.42037		#N/A
CBLB	ENSG00000114423	CBLB	0.776374	0.00255743		10.1696	10.6618	9.84239	10.9905	9.83196	11.1351	10.019	10.3672	10.095	10.7728	9.549	10.1167		#N/A
MDFI	ENSG00000112559	MDFI	-0.626713	0.00263235		10.6523	10.3885	10.4992	9.66469	10.2866	9.56823	10.3542	9.72143	10.5242	9.78485	10.2273	9.57279		#N/A
HSPB8	ENSG00000152137	HSPB8	1.11534	0.00264796		9.83546	10.4173	9.78749	11.1255	9.20215	10.4359	8.59615	9.9066	9.65425	10.5477	8.78885	10.2618		#N/A
CREBRF	ENSG00000164463	CREBRF	-0.726935	0.00266752		7.31179	7.37497	7.81917	6.67649	7.61668	6.52796	7.58695	6.95452	7.76236	7.36625	7.94652	6.87929		#N/A
JOSD1	ENSG00000100221	JOSD1	0.507714	0.00272355		10.2877	10.5706	9.83639	10.5563	9.92884	10.4584	9.7065	10.1445	10.0037	10.4316	9.71145	10.3713		#N/A
EED	ENSG00000074266	EED	0.377058	0.0027362		8.35082	8.52545	8.25203	8.79568	8.22044	8.85082	8.37337	8.56302	8.19351	8.58693	8.33892	8.64274		#N/A
TBCK	ENSG00000145348	TBCK	-0.409103	0.00276261		8.6579	8.26102	8.94099	8.57422	8.81217	8.38386	8.88794	8.61266	8.9554	8.38355	8.9585	8.55893		#N/A
CDON	ENSG00000064309	CDON	-1.04702	0.00277825		8.45902	7.95392	10.209	9.05944	10.0503	8.91312	10.3643	9.43912	9.53398	8.48347	10.0826	8.8684		#N/A
ITPKC	ENSG00000086544	ITPKC	0.920642	0.00279088		9.35219	9.98109	9.11209	10.2318	8.85298	9.84243	8.2344	9.35801	8.66598	9.53093	8.62353	9.44438		#N/A
PPP1R15B	ENSG00000158615	PPP1R15B	0.319877	0.00279088		9.56528	9.86506	9.60727	10.1325	9.86498	9.97294	9.83158	10.1921	9.4881	9.7112	9.47853	9.85637		#N/A
BCR	ENSG00000186716	BCR	-0.370434	0.00288991		10.4762	10.2841	10.7943	10.2134	10.5153	10.1263	10.5202	10.2392	10.5418	10.2385	10.8028	10.3661		#N/A
CSRNP1	ENSG00000144655	CSRNP1	0.931244	0.00291337		8.68246	8.92231	7.63103	8.85623	7.80996	9.15228	7.29641	8.62883	8.45608	9.07733	7.6643	8.56968		#N/A
DDX20	ENSG00000064703	DDX20	0.44152	0.0030119		8.73036	9.01933	8.74363	9.39928	8.80463	9.36037	9.07484	9.55706	8.6568	9.02302	8.93716	9.2308		#N/A
OVOL1	ENSG00000172818	OVOL1	1.57007	0.00302548		7.55286	8.8152	7.38207	9.39765	6.1221	7.48546	6.22998	7.5513	6.89669	8.29466	6.54352	7.91761		#N/A
TTBK2	ENSG00000128881	TTBK2	-0.714528	0.00302548		8.11256	7.62094	8.46526	7.18703	8.72293	7.97262	8.66336	8.14409	8.50809	7.56179	8.08232	7.73873		#N/A
LMX1B	ENSG00000136944	LMX1B	-1.50767	0.00302548		5.58259	4.4803	7.99098	6.26949	6.69559	5.29691	6.26503	5.35992	6.69608	5.1672	6.67539	5.34538		#N/A
NUP153	ENSG00000124789	NUP153	0.374604	0.00304009		10.6749	10.8179	10.7607	11.1947	10.7015	11.1865	10.8284	11.3023	10.5492	10.8288	10.767	11.171		#N/A
NFKB2	ENSG00000077150	NFKB2	1.37402	0.00304009		10.2594	10.5878	8.43779	10.3561	8.76241	10.9553	8.50013	10.0311	8.86789	9.83825	8.41978	10.1154		#N/A
CAPRIN2	ENSG00000110888	CAPRIN2	-0.449357	0.00304009		9.92051	9.53271	9.90677	9.32924	9.66491	9.13147	9.92631	9.47714	10.0371	9.80645	10.2857	9.78131		#N/A
CDK12	ENSG00000167258	CDK12	0.308302	0.00309915		10.7764	11.1237	10.8951	11.0278	10.6233	10.9102	10.6658	11.0429	10.5956	11.023	10.7052	10.9902		#N/A
DLGAP5	ENSG00000126787	DLGAP5	-0.637844	0.00309915		9.58495	9.04589	10.2434	9.39275	10.4743	9.56306	10.476	9.85941	9.92428	9.56428	10.1715	9.61317		#N/A
SYBU	ENSG00000147642	SYBU	1.19012	0.00313227		7.70445	8.20083	7.83128	9.35296	7.54604	9.39861	7.3299	8.42536	8.2187	9.01191	6.84795	8.12611		#N/A
TRAPPC11	ENSG00000168538	TRAPPC11	-0.287149	0.00313874		9.49307	9.29431	9.62129	9.26458	9.55902	9.22939	9.72706	9.40008	9.63255	9.33977	9.50939	9.3077		#N/A
ENSG00000280152	ENSG00000280152	ENSG00000280152	0.928487	0.00318608		5.68337	6.27207	5.22203	5.93414	4.50829	5.96351	4.29929	5.50717	5.72748	6.1935	5.28173	6.20068		#N/A
PIDD1	ENSG00000177595	PIDD1	-0.540215	0.0032078		9.40234	9.2146	9.65916	8.92116	9.71809	8.98061	9.33609	8.76968	9.56868	9.02671	9.86123	9.43657		#N/A
BAHD1	ENSG00000140320	BAHD1	0.654285	0.0032078		8.904	9.15728	8.59169	9.39765	8.43111	9.28384	8.2344	8.97593	8.18501	8.80432	8.32072	8.99604		#N/A
HELB	ENSG00000127311	HELB	-0.801898	0.0032078		6.59194	6.50433	7.07081	6.15074	6.5942	5.86609	6.95387	6.48556	7.17069	5.90403	7.13296	5.93859		#N/A
CHAC1	ENSG00000128965	CHAC1	2.13013	0.00324966		6.80078	7.24345	4.74688	4.93862	5.7023	8.26787	4.98577	8.08435	6.0035	7.09856	4.78334	8.35869		#N/A
LPIN3	ENSG00000132793	LPIN3	-0.683324	0.00328108		8.6986	8.31006	8.75002	7.82809	8.2261	7.8249	8.02545	7.32384	8.80552	7.96661	8.55979	7.77632		#N/A
MAB21L4	ENSG00000172478	MAB21L4	1.41723	0.00328996		7.33263	8.17218	8.96593	10.4518	8.10847	10.1644	7.74425	9.03051	8.60361	9.47808	7.97472	9.66753		#N/A
FEM1B	ENSG00000169018	FEM1B	0.460778	0.00330476		9.96957	10.3496	10.1821	11.1072	10.3695	10.6314	10.3295	10.6665	10.095	10.4646	10.2185	10.6489		#N/A
SLC2A3	ENSG00000059804	SLC2A3	1.05922	0.00332932		13.2636	13.82	13.9724	15.451	13.6514	14.6392	13.2055	14.2821	14.0511	14.8007	13.6249	14.8648		#N/A
GOLPH3L	ENSG00000143457	GOLPH3L	-0.424552	0.00338615		8.89001	8.61688	9.1776	8.79568	9.02518	8.29307	9.07977	8.77841	8.99239	8.65041	9.10179	8.5481		#N/A
EPC2	ENSG00000135999	EPC2	0.462984	0.00339316		9.28161	9.69087	9.62825	10.0968	9.35977	9.61145	9.55897	10.1635	9.19635	9.83825	9.44028	9.78439		#N/A
DNAJB11	ENSG00000090520	DNAJB11	0.47688	0.00339316		9.2436	9.48108	8.92695	9.74117	9.13454	9.4245	8.78002	9.41508	9.08433	9.31588	8.84849	9.48279		#N/A
EIF1	ENSG00000173812	EIF1	0.369801	0.00342881		11.8498	12.0475	11.5523	11.9004	11.5116	12.0313	11.4537	12.0327	11.6376	11.8208	11.4823	11.8811		#N/A
CASP9	ENSG00000132906	CASP9	0.654231	0.00346776		7.42285	7.65585	7.64483	8.52434	7.93962	8.62627	7.82866	8.68559	7.93947	8.3249	7.50582	8.30397		#N/A
KLF13	ENSG00000275746	KLF13	0.957634	0.00350558		9.71762	9.9321	9.48609	10.9899	9.12851	10.3767	8.84226	9.63919	9.31983	10.1802	9.14586	10.0543		#N/A
FRAT2	ENSG00000181274	FRAT2	-0.68228	0.00350558		7.25833	7.02587	7.83128	6.98492	7.39344	6.22159	7.47166	6.90225	7.35616	6.66002	7.47982	6.87929		#N/A
WTIP	ENSG00000142279	WTIP	0.458113	0.00353076		8.48718	8.66565	8.59525	9.30511	8.63206	8.96893	8.5038	9.04022	8.65064	9.14332	8.48986	8.90563		#N/A
WTAP	ENSG00000146457	WTAP	0.311601	0.00357733		10.1059	10.3718	10.3744	10.6509	10.2001	10.4059	10.3784	10.6436	10.064	10.5231	10.1542	10.5347		#N/A
ENSG00000232618	ENSG00000232618	ENSG00000232618	1.38747	0.00357733		4.87912	5.5066	3.6518	5.89773	4.43199	6.02498	3.72559	5.26377	4.81056	5.0562	4.21798	5.24168		#N/A
MXD3	ENSG00000213347	MXD3	-0.788453	0.00362003		7.0093	6.60779	7.71841	6.68719	7.74837	7.23537	7.84033	7.22518	7.88282	7.13998	7.9274	6.7212		#N/A
APOBEC3G	ENSG00000239713	APOBEC3G	-0.981779	0.00367302		7.71243	7.21564	8.2016	7.05272	8.10847	6.8837	7.50136	6.4127	7.86697	7.19342	8.75943	7.78864		#N/A
SELENOK	ENSG00000113811	SELENOK	0.436641	0.00370109		7.74388	7.9651	7.43859	8.06406	7.56403	8.176	7.61438	7.82837	7.61837	7.90388	7.40579	8.01518		#N/A
RUNDC1	ENSG00000198863	RUNDC1	0.392208	0.00371906		8.37111	8.40751	8.30511	8.90978	8.3964	8.79015	8.40514	8.79283	7.9744	8.40636	7.984	8.4507		#N/A
KL	ENSG00000133116	KL	2.2312	0.00377991		2.65801	3.14098	3.85531	5.04234	3.46391	5.86609	3.25356	3.77696	2.89481	4.80473	3.01047	5.00883		#N/A
CHN1	ENSG00000128656	CHN1	-0.47807	0.00399313		9.00807	8.78082	9.71416	9.0615	9.33902	8.7543	9.61946	9.10639	9.31594	8.94727	9.40098	8.92807		#N/A
MACC1	ENSG00000183742	MACC1	1.21512	0.00404465		10.0551	10.4672	9.38288	11.013	9.2362	10.2855	8.22107	9.46997	9.20268	10.5617	8.71275	10.4432		#N/A
CDC20	ENSG00000117399	CDC20	-0.432928	0.00404465		9.48843	9.31848	10.2218	9.58248	10.0374	9.70832	10.1384	9.71538	9.79906	9.40917	10.0739	9.50535		#N/A
MUL1	ENSG00000090432	MUL1	0.392349	0.00409054		8.16579	8.37854	8.22015	8.65552	7.96014	8.40713	8.11941	8.42165	7.94953	8.50477	8.1905	8.55893		#N/A
PXMP4	ENSG00000101417	PXMP4	-1.2578	0.00409054		6.60912	5.78411	7.85521	6.28367	7.72457	6.14058	6.97519	5.91847	6.44887	5.36647	7.71534	6.70829		#N/A
BRPF1	ENSG00000156983	BRPF1	0.403932	0.00413782		9.25729	9.55876	8.86053	9.51498	9.07933	9.45553	9.19556	9.60853	8.97031	9.24805	9.06072	9.44438		#N/A
RNF2	ENSG00000121481	RNF2	0.444276	0.00419208		9.13212	9.35292	9.22198	9.85712	9.26947	9.65585	9.44134	9.99285	9.09117	9.55665	9.37652	9.74385		#N/A
DDX5	ENSG00000108654	DDX5	0.263404	0.00422588		13.7492	13.9403	13.677	14.1092	13.6501	13.8755	13.6684	13.9178	13.5938	13.8162	13.5771	13.8276		#N/A
CENPF	ENSG00000117724	CENPF	-0.636202	0.0042296		11.5535	11.3383	12.2641	11.3847	12.2246	11.5077	12.5688	11.8971	12.0445	11.4875	12.3553	11.6513		#N/A
FAM160A2	ENSG00000051009	FAM160A2	0.419403	0.00426951		8.92474	9.34225	9.08199	9.60383	8.93129	9.5103	9.17958	9.57219	9.32564	9.4968	9.23989	9.68576		#N/A
NEDD4L	ENSG00000049759	NEDD4L	0.770755	0.00430155		11.0587	11.6643	10.622	11.748	10.4455	11.2729	10.2812	10.7135	10.4321	11.1271	10.5206	11.3153		NEDD4L
PLEKHG3	ENSG00000126822	PLEKHG3	0.582815	0.00430212		10.7485	10.9981	10.1951	10.919	10.1563	10.8264	9.69369	10.3691	10.6491	10.9108	10.4487	11.3306		#N/A
TASOR	ENSG00000163946	TASOR	-0.401344	0.00430212		10.3362	9.97143	10.6809	10.3136	10.8381	10.2311	10.9165	10.4541	10.6044	10.356	10.5876	10.2316		#N/A
DENND11	ENSG00000262599	DENND11	-0.371732	0.00430212		10.1926	10.0084	10.2298	9.76916	10.1652	9.76572	10.2266	9.9066	10.2301	9.857	10.0531	9.53124		#N/A
IFRD1	ENSG00000006652	IFRD1	0.626844	0.00430212		9.37999	9.79319	9.00922	9.95117	8.84197	9.62144	9.03224	9.48959	9.05666	9.45091	8.59958	9.37868		#N/A
IRS2	ENSG00000185950	IRS2	0.774179	0.00430212		7.83433	8.59905	8.03878	9.05531	7.75621	8.07062	7.44134	8.42536	8.26779	8.89582	8.29485	9.06095		#N/A
VASN	ENSG00000274334	VASN	1.13479	0.00430212		8.49644	8.63098	5.97798	7.90348	6.66258	8.03371	6.11942	7.93627	7.90367	8.13994	7.14128	8.68289		#N/A
DHRS4-AS1	ENSG00000285282	DHRS4-AS1	-0.601522	0.00430212		7.63904	7.07828	8.10013	7.42309	8.08374	7.27386	8.26934	7.66859	7.91912	7.75188	7.88345	7.08304		#N/A
TMEM44	ENSG00000145014	TMEM44	-0.470406	0.00430212		7.69644	7.37497	7.83128	7.27482	7.76401	7.47448	8.07566	7.6241	7.76236	7.1125	7.91775	7.41244		#N/A
MAD2L1BP	ENSG00000124688	MAD2L1BP	0.548494	0.0045207		7.63065	8.14787	7.49298	8.09655	7.67578	7.8249	7.47166	8.1214	7.00683	7.88776	7.34947	7.77012		#N/A
DCAF5	ENSG00000139990	DCAF5	-0.205251	0.00452118		10.9149	10.6103	10.9696	10.8361	10.9754	10.8296	11.004	10.7248	10.9072	10.6658	10.7757	10.6522		#N/A
TNS1	ENSG00000079308	TNS1	-0.530589	0.00452118		10.1418	9.75345	10.4203	9.69683	10.0708	9.29636	9.74734	9.33651	10.1744	9.68811	10.2175	9.86221		#N/A
STK36	ENSG00000163482	STK36	-0.392824	0.00452118		9.34964	9.04061	9.40331	8.96581	9.43988	8.9922	9.67427	9.25758	9.45492	9.14671	9.63987	9.22628		#N/A
RASEF	ENSG00000165105	RASEF	0.863895	0.00452118		7.54395	8.00355	7.63795	8.83472	7.25635	8.3602	7.1541	8.56302	7.58647	8.26376	7.22193	7.34731		#N/A
ZCCHC7	ENSG00000147905	ZCCHC7	-0.538871	0.00452118		8.31984	7.64199	8.3479	7.63146	7.96014	7.54962	8.31186	7.71174	7.69814	7.45644	8.11648	7.65374		#N/A
ABRAXAS1	ENSG00000163322	ABRAXAS1	-0.584144	0.00452118		7.04762	6.78223	7.43859	6.88616	7.52782	6.5903	7.3867	6.88081	7.25427	6.60193	7.60539	7.08304		#N/A
KALRN	ENSG00000160145	KALRN	0.444951	0.00457569		9.55201	9.60594	8.89268	9.55644	8.84932	9.48591	9.0449	9.33848	9.2725	9.648	8.97023	9.65413		#N/A
PRR11	ENSG00000068489	PRR11	-0.420297	0.00459746		9.33422	9.17664	9.51829	8.93245	9.85953	9.15572	9.54656	9.27413	9.44606	9.05585	9.34085	8.94743		#N/A
MIR222HG	ENSG00000270069	MIR222HG	1.31417	0.00459746		7.3934	7.86124	6.54687	8.16709	6.55876	8.29307	5.67429	7.33965	7.32557	8.19338	5.7197	7.47475		#N/A
ENSG00000279789	ENSG00000279789	ENSG00000279789	1.02641	0.00459746		5.65055	5.90511	5.14648	6.08749	4.64976	6.22159	4.98577	6.65937	6.0227	6.24503	5.69731	6.73399		#N/A
PEX2	ENSG00000164751	PEX2	-0.421367	0.00463184		8.95865	8.581	9.28719	8.67984	9.38528	8.59113	9.09446	8.84914	8.74613	8.44543	8.92758	8.73155		#N/A
VAMP4	ENSG00000117533	VAMP4	-0.497973	0.00469735		7.84162	7.27073	7.51567	7.07735	7.77949	7.11331	7.68078	7.43102	7.93441	7.09856	7.55646	7.36387		#N/A
RNF34	ENSG00000170633	RNF34	0.547932	0.00471122		9.10513	9.57527	8.85757	9.60524	8.91386	9.44714	8.58232	8.986	8.73744	9.30378	8.76752	9.26206		#N/A
FRS2	ENSG00000166225	FRS2	0.487296	0.00483762		9.0807	9.35505	9.56981	10.0581	9.30467	9.59127	9.37471	10.0408	9.21941	9.68112	9.20261	9.85637		#N/A
USP36	ENSG00000055483	USP36	0.524446	0.0048558		9.86258	10.0679	9.54428	10.3118	9.78672	10.3349	9.5625	10.1264	9.46548	9.79569	9.76492	10.4373		#N/A
CA2	ENSG00000104267	CA2	0.789331	0.00491315		8.21151	8.48332	7.65167	8.65824	7.10486	8.67981	7.76276	8.76676	7.48631	8.1868	7.90315	8.15969		#N/A
PER1	ENSG00000179094	PER1	0.655355	0.00509109		8.15413	8.38687	8.11507	9.01551	8.46501	8.92122	8.42851	9.40008	7.71003	8.41201	8.32438	8.91689		#N/A
VPS8	ENSG00000156931	VPS8	-0.358038	0.00509251		9.44124	9.17664	9.52016	9.18183	9.44717	8.90087	9.424	9.0642	9.56377	9.17022	9.23601	8.99338		#N/A
LONRF1	ENSG00000285360	LONRF1	0.593064	0.00510023		9.46503	9.36563	9.26057	10.3153	9.60101	10.0284	9.19783	9.82332	8.91745	9.72033	8.99339	9.73433		#N/A
SLC9A2	ENSG00000115616	SLC9A2	2.46738	0.00510023		5.13779	5.73271	3.53815	6.08749	2.37082	5.43919	2.54738	4.31368	3.19475	4.93594	3.01047	5.5902		#N/A
ARHGAP21	ENSG00000107863	ARHGAP21	0.487665	0.00510789		11.6196	11.8944	11.6431	12.2658	11.3996	11.9789	11.2091	11.6521	11.3605	11.8958	11.4217	11.8688		#N/A
THRA	ENSG00000126351	THRA	-0.792171	0.00512302		8.43031	7.91986	8.53357	7.31679	8.75851	7.94903	9.23807	8.28137	8.7888	8.28238	8.92034	8.18787		#N/A
PPARGC1A	ENSG00000109819	PPARGC1A	1.04922	0.00512302		4.82131	5.47567	4.6948	5.67917	4.64976	4.89749	4.60306	5.76303	5.12669	5.58216	4.44998	6.25495		#N/A
MYADM	ENSG00000179820	MYADM	1.00678	0.00524902		12.0503	12.3961	10.6564	12.2866	11.2714	12.4264	10.6047	11.8329	11.5306	12.3885	10.6516	11.7344		#N/A
IFNGR1	ENSG00000027697	IFNGR1	0.669084	0.00524902		9.24085	9.75506	8.40979	9.58105	8.68233	9.14192	8.74631	9.43729	8.75476	9.33977	8.53159	9.08362		#N/A
RHOT1	ENSG00000126858	RHOT1	-0.444073	0.00524902		8.63711	8.34471	8.97687	8.40942	8.81593	8.39554	9.25778	8.50462	8.80275	8.34275	8.58745	8.48895		#N/A
IQSEC2	ENSG00000124313	IQSEC2	-0.708699	0.00530169		7.60518	7.10883	8.47687	7.76884	8.17435	6.81575	7.92494	7.38606	8.00367	7.34279	7.83811	7.33056		#N/A
TNFRSF9	ENSG00000049249	TNFRSF9	1.85888	0.0053156		7.03496	6.85614	4.46533	7.26771	5.56613	8.54467	5.28795	7.50998	5.88263	6.43448	4.82525	7.55625		#N/A
SYNGR1	ENSG00000100321	SYNGR1	-0.656987	0.00536418		8.52388	7.77496	8.75639	8.05169	8.99234	8.48576	8.95387	8.50812	8.86789	7.99698	9.15616	8.48138		#N/A
METTL15	ENSG00000169519	METTL15	-0.498698	0.00536574		7.72035	7.37497	8.05952	7.22426	8.2261	7.47448	8.12419	7.80008	7.87227	7.54132	7.90803	7.52714		#N/A
SLC20A2	ENSG00000168575	SLC20A2	1.09009	0.0053762		10.5615	11.2102	9.62825	11.2669	9.59227	10.7545	9.14707	9.82753	9.70267	10.5021	9.24954	10.7633		#N/A
LCMT2	ENSG00000168806	LCMT2	0.422433	0.00547663		7.42285	7.58517	7.67202	7.94422	7.71655	8.09949	7.62116	8.21436	7.46542	7.82142	7.30573	7.98873		#N/A
PBDC1	ENSG00000102390	PBDC1	0.520692	0.00554266		9.03375	9.38864	9.3198	10.0311	9.0762	9.58108	8.98835	9.30666	8.87846	9.43158	9.00938	9.58872		#N/A
RAB7B	ENSG00000276600	RAB7B	3.10897	0.00554266		4.15945	4.71026	2.30804	6.55315	2.91018	5.39331	2	4.43637	2.51569	3.41312	2.8573	4.67905		#N/A
PBX3	ENSG00000167081	PBX3	-0.58277	0.00567683		8.87233	8.62395	8.76904	7.65347	8.81968	8.2551	8.85956	8.46554	8.89939	8.16021	8.7994	8.24708		#N/A
HAUS2	ENSG00000137814	HAUS2	0.417108	0.00567683		8.33541	8.52922	8.23845	8.56844	8.13277	8.80775	8.45531	8.51858	8.01809	8.66939	8.12908	8.71551		#N/A
CETN3	ENSG00000153140	CETN3	-0.4084	0.00571948		8.15997	8.01972	8.47301	7.74342	8.36596	8.12778	8.52925	8.06071	8.43832	8.01935	8.41636	8.02563		#N/A
HECTD4	ENSG00000173064	HECTD4	-0.25281	0.00576266		10.8231	10.628	10.802	10.5305	10.9224	10.7201	10.8752	10.7383	10.9617	10.6178	10.9132	10.551		#N/A
SENP5	ENSG00000119231	SENP5	0.328745	0.00577786		9.31078	9.44162	9.31765	9.72957	9.39033	9.50491	9.17267	9.54688	9.28647	9.67878	9.16843	9.68411		#N/A
RAB21	ENSG00000080371	RAB21	0.392943	0.00582416		9.28429	9.50999	9.39925	9.94673	9.49248	9.73156	9.2556	9.64874	9.40824	9.81073	9.07598	9.60623		#N/A
ZNF404	ENSG00000176222	ZNF404	-1.15211	0.00588703		5.77758	4.20661	5.95603	4.57349	5.00615	4.34327	5.75046	4.49401	5.16174	4.73436	5.983	5.24168		#N/A
TMEM87A	ENSG00000103978	TMEM87A	0.357741	0.00589687		9.18178	9.48303	9.1609	9.55644	8.9033	9.49951	9.03479	9.27823	9.2745	9.57941	9.05852	9.3561		#N/A
BRD2	ENSG00000235307	BRD2	0.285589	0.00595951		12.0039	12.4881	12.1283	12.3331	12.0114	12.2844	12.1487	12.3733	11.9233	12.176	11.9551	12.2095		#N/A
SLC6A6	ENSG00000131389	SLC6A6	-0.317246	0.00610685		10.0218	9.85608	10.1131	10.053	10.4136	9.98845	10.4246	9.9342	10.1538	9.7112	10.1917	9.89391		#N/A
TP63	ENSG00000073282	TP63	-1.24532	0.00611806		9.91188	9.4496	11.3639	9.05737	10.2825	8.63615	10.1026	8.86288	10.4719	10.2715	10.3967	8.81821		#N/A
MRTFB	ENSG00000186260	MRTFB	-0.402683	0.00613832		10.0282	9.66025	10.3217	9.61929	10.2356	10.0228	10.344	9.96127	10.0229	9.74066	10.3553	9.89248		#N/A
TMEM101	ENSG00000091947	TMEM101	-0.46039	0.00615823		7.57051	7.28864	7.67874	7.38414	7.89057	7.41832	7.99967	7.2998	8.0085	7.38933	7.83299	7.54903		#N/A
BUB1	ENSG00000169679	BUB1	-0.543963	0.00617052		9.65901	9.40925	9.9323	9.33945	10.3923	9.68946	10.4487	9.87576	10.0489	9.55154	10.0976	9.50908		#N/A
PLCL2	ENSG00000284017	PLCL2	-0.693954	0.00622936		6.6261	5.70631	6.5321	5.89773	6.86477	6.29828	6.92129	5.93937	6.04164	5.76975	6.0375	5.5902		#N/A
RGCC	ENSG00000102760	RGCC	3.22585	0.00624023		4.06298	4.71026	2.30804	5.76253	2	4.52446	2.2995	4.43637	4.14973	5.76975	2	4.17778		#N/A
PPP4R1	ENSG00000154845	PPP4R1	0.429786	0.00626843		10.9054	11.1287	10.6071	11.2426	10.4979	11.0256	10.5684	10.9743	10.6782	11.0693	10.4157	10.8124		#N/A
HDAC5	ENSG00000108840	HDAC5	0.55749	0.00634782		9.16445	9.19812	9.1609	10.2143	9.08246	9.86782	9.21809	9.84564	8.88896	9.16354	9.07381	9.56027		#N/A
CCDC120	ENSG00000147144	CCDC120	1.02562	0.0064651		9.49999	10.0164	9.57342	10.9013	10.0677	11.3936	8.82475	10.2756	10.0253	10.6348	9.32816	10.3053		#N/A
SRPRA	ENSG00000182934	SRPRA	0.262041	0.00679689		10.1565	10.2272	10.0471	10.1957	9.93922	10.3929	9.97607	10.2529	10.123	10.4218	10.1345	10.449		#N/A
CLCF1	ENSG00000175505	CLCF1	1.57988	0.00680531		8.58595	9.34866	6.18094	8.32966	6.28279	8.12076	5.82281	7.92059	7.48631	8.66939	5.74175	7.8428		#N/A
TMED8	ENSG00000100580	TMED8	-0.483289	0.00697464		9.35729	8.94506	9.27394	8.72989	9.82078	9.0037	9.32575	9.10639	9.17721	8.95116	9.44868	8.83909		#N/A
ISCA2	ENSG00000165898	ISCA2	-0.483302	0.00697464		7.29064	6.60779	7.03983	6.59923	7.25635	6.72605	7.29641	6.86996	7.10916	6.82147	6.98367	6.55809		#N/A
EIF4A3	ENSG00000141543	EIF4A3	0.240082	0.00701868		9.59792	9.75988	9.65576	9.80031	9.65445	9.84456	9.60244	9.83033	9.37875	9.80859	9.48835	9.77359		#N/A
SLC35B1	ENSG00000121073	SLC35B1	0.342217	0.00701868		8.74986	8.99227	8.64757	9.00485	8.70682	9.06717	8.61325	9.03051	8.78037	8.93164	8.38167	8.91127		#N/A
MAPK7	ENSG00000166484	MAPK7	0.51024	0.0070489		8.94856	9.16699	8.55564	9.11402	8.45058	9.24562	8.54002	8.94784	8.35368	9.11244	8.45023	8.77243		#N/A
TBC1D31	ENSG00000156787	TBC1D31	-0.681679	0.0070489		7.57051	6.79482	7.81307	6.71885	7.9188	6.66943	7.82279	7.52389	7.20471	7.05592	7.57501	7.00073		#N/A
KIF21A	ENSG00000139116	KIF21A	-0.42115	0.00718793		9.80596	9.53458	9.98068	9.42988	9.87041	9.28698	9.99706	9.51243	9.81979	9.73392	9.76088	9.16618		#N/A
DUSP14	ENSG00000275932	DUSP14	0.929153	0.00721213		8.95193	9.50617	8.51867	9.73086	8.28151	9.37814	7.90286	8.95555	8.39109	9.15346	7.74293	8.67295		#N/A
KIAA0586	ENSG00000100578	KIAA0586	-0.567245	0.00728032		8.53292	8.4479	8.84568	8.15557	9.05728	8.23572	9.20462	8.72524	8.75476	7.96661	8.92758	8.35456		#N/A
MAFK	ENSG00000198517	MAFK	0.696496	0.00728548		8.23383	8.68606	8.02302	8.86097	7.57294	8.12778	7.26213	8.14858	8.14615	8.61658	7.79131	8.70904		#N/A
GCH1	ENSG00000131979	GCH1	0.646743	0.00739046		8.03839	8.19135	7.19787	8.33648	7.8398	8.48028	7.56602	8.33756	7.34857	8.11938	7.43991	7.91199		#N/A
POLK	ENSG00000122008	POLK	-0.378982	0.00739046		8.40101	7.90252	8.13963	7.76379	8.16259	7.89242	8.19859	7.98231	8.08354	7.71581	8.28362	7.7639		#N/A
RAB22A	ENSG00000124209	RAB22A	0.389749	0.00744485		9.53413	9.81652	9.3025	9.81381	9.33379	9.68709	9.31115	9.66608	9.20688	9.76734	9.17046	9.41885		#N/A
LTV1	ENSG00000135521	LTV1	0.521089	0.00744485		7.76703	8.09288	7.58169	8.16709	7.80996	7.9804	7.70011	8.08904	7.13585	8.17357	7.72644	8.34207		#N/A
PRPSAP1	ENSG00000161542	PRPSAP1	-0.354423	0.00758439		8.8652	8.65188	9.13182	8.61404	8.88195	8.43004	8.79208	8.56302	8.79719	8.56682	8.87617	8.41142		#N/A
FOS	ENSG00000170345	FOS	-1.74965	0.00763797		10.8967	10.0002	13.337	11.1017	13.4642	11.1007	12.1191	10.4071	12.7904	11.8523	11.9247	8.85674		#N/A
CEP250	ENSG00000126001	CEP250	-0.493992	0.00763797		10.4467	10.1583	10.7535	10.1948	10.8454	10.2392	11.143	10.6243	10.7418	10.3068	10.948	10.4216		#N/A
NECTIN2	ENSG00000130202	NECTIN2	0.379017	0.00764157		11.5809	11.7669	11.1855	11.6539	11.1344	11.609	11.0079	11.365	11.4046	11.6904	11.1146	11.6365		#N/A
HCG11	ENSG00000228223	HCG11	-0.790194	0.00764157		7.89163	6.76954	7.95822	7.33733	8.26511	7.16884	8.37738	7.76539	8.11071	7.65044	8.6056	7.73873		#N/A
LIPK	ENSG00000204021	LIPK	2.54171	0.00764157		3.10823	4.4803	3.94723	6.21134	2.91018	5.56869	2.2995	3.46734	3.19475	4.49998	2.26653	3.63911		#N/A
ENSG00000240661	ENSG00000240661	ENSG00000240661	1.33275	0.00764157		3.9596	5.08285	3.75714	4.82688	3.86308	4.136	3.38682	4.37633	3.83919	4.31948	3.39138	5.31163		#N/A
MYO1C	ENSG00000197879	MYO1C	0.741198	0.00768315		11.3033	11.4278	10.9758	12.0388	10.7297	11.7931	10.346	11.129	11.272	11.6741	10.783	11.7475		#N/A
ZNF326	ENSG00000162664	ZNF326	0.412175	0.00768315		10.0298	10.4284	10.2286	10.923	10.174	10.5913	10.5065	10.7413	10.2928	10.642	10.3606	10.7405		#N/A
MAP2K5	ENSG00000137764	MAP2K5	-0.544681	0.00776947		7.72035	6.89172	8.27882	7.62033	8.08374	7.47448	8.12419	7.52389	7.72183	7.56179	8.01602	7.60582		#N/A
CLDN9	ENSG00000213937	CLDN9	0.799576	0.00776947		5.68337	6.4256	6.18094	6.71885	5.4929	6.44043	5.06745	6.15126	5.72748	6.43448	5.80595	6.46906		CLDN9
SUOX	ENSG00000139531	SUOX	-0.611267	0.00795461		8.70261	8.39516	9.47069	8.38002	9.25016	8.44136	9.424	8.986	8.76904	8.42882	9.31718	8.66629		#N/A
PHKG2	ENSG00000156873	PHKG2	0.427081	0.00808549		8.35592	8.94224	8.60234	8.91662	8.25407	8.7082	8.49276	8.91392	8.40213	8.61658	8.56907	9.08861		#N/A
MARF1	ENSG00000277140	MARF1	-0.359936	0.00819338		9.79286	9.50426	9.89383	9.38948	9.66907	9.29948	9.99706	9.69095	9.75526	9.46998	9.90586	9.50162		#N/A
CFAP97	ENSG00000164323	CFAP97	-0.403026	0.00819338		9.10209	8.80901	9.35169	8.86333	9.54777	8.71287	9.24248	9.07132	9.25231	8.98565	9.3888	9.03533		#N/A
PLEKHA5	ENSG00000052126	PLEKHA5	-0.378626	0.00821923		9.99103	9.54765	9.91248	9.36302	9.67942	9.26167	9.8169	9.59213	9.6847	9.40917	9.67181	9.31624		#N/A
MPZL2	ENSG00000149573	MPZL2	0.794629	0.00821923		7.99329	8.04628	7.7314	9.13958	8.48875	9.34839	7.73802	8.72524	8.10171	8.48882	7.84322	8.8272		#N/A
BANP	ENSG00000172530	BANP	-0.595488	0.00824369		7.78226	7.62094	7.96373	7.04442	8.03298	7.48546	7.79908	7.52389	8.29568	7.23223	7.70976	7.17973		#N/A
ZMYM1	ENSG00000197056	ZMYM1	-0.369835	0.00837615		8.17158	7.95392	8.47687	7.87098	8.43601	7.89242	8.36532	8.00727	8.28379	8.20643	8.3711	7.99937		#N/A
CTH	ENSG00000116761	CTH	0.877396	0.00843408		6.50281	6.99348	7.00816	8.26324	6.94932	7.6408	6.89915	7.64969	7.17069	7.65996	7.0992	8.27799		#N/A
ZNF391	ENSG00000124613	ZNF391	-0.663733	0.00844639		7.58795	7.40811	7.93595	7.43585	8.3401	7.1274	8.48534	7.67483	8.04181	7.60186	8.32438	7.64021		#N/A
USP43	ENSG00000154914	USP43	0.753141	0.00849238		8.08211	8.16251	7.51567	8.69318	7.43313	8.01868	7.37872	7.94663	7.66187	8.62146	7.12459	8.16915		#N/A
CMC2	ENSG00000103121	CMC2	0.457434	0.00849238		7.18	7.30632	7.07081	7.8135	7.26737	7.57038	7.37872	7.65601	6.89669	7.49951	6.73156	7.35562		#N/A
ENSG00000259605	ENSG00000259605	ENSG00000259605	-1.51867	0.00852384		4.49141	4.04746	4.33527	2.96525	4.71562	3.01338	4.23003	2.28764	4.93736	4.31948	5.01827	4.17778		#N/A
PXK	ENSG00000168297	PXK	-0.544127	0.00858284		7.34294	7.12885	7.90763	7.06098	8.08374	7.18239	7.58	7.03439	7.41546	6.95123	7.28335	7.1225		#N/A
DFFB	ENSG00000169598	DFFB	-0.709949	0.00863932		6.84497	6.64996	6.60447	6.05479	7.08007	6.56982	7.19102	6.13323	7.14464	6.29477	6.83775	5.89368		#N/A
MAP10	ENSG00000212916	MAP10	-0.679575	0.00873547		6.38804	5.70631	7.00816	5.96965	6.2161	5.72504	6.54717	6.00031	6.2018	5.96676	6.46616	5.72448		#N/A
RBM12	ENSG00000244462	RBM12	0.326145	0.00901857		11.0021	11.1907	11.3618	11.5947	11.2755	11.6339	11.3565	11.7901	11.1567	11.4385	11.1802	11.6102		#N/A
TRIM9	ENSG00000100505	TRIM9	1.30932	0.00902519		6.42732	7.16807	6.25475	8.01816	7.42331	8.6654	6.31605	7.03439	5.26208	6.4782	6.0014	7.73236		#N/A
KIF20A	ENSG00000112984	KIF20A	-0.745128	0.00907877		9.53638	9.0925	10.5606	9.32924	10.594	9.6607	10.5274	9.87982	10.0442	9.62388	10.5746	9.83871		#N/A
PEX11B	ENSG00000131779	PEX11B	-0.445708	0.00907877		7.42285	7.01515	7.54539	6.99357	7.61668	6.91651	7.66774	7.13746	7.54724	7.12631	7.39192	7.35562		#N/A
AMD1	ENSG00000123505	AMD1	0.471814	0.00918114		10.6606	11.0781	10.0196	10.757	10.4563	10.9375	10.2233	10.5558	10.2291	10.6799	10.4225	10.8363		#N/A
NDFIP2	ENSG00000102471	NDFIP2	0.85803	0.00938949		9.60864	10.0974	9.62999	10.9872	9.43744	10.1228	8.9831	9.6376	9.51037	10.2258	8.93716	9.97564		#N/A
MFHAS1	ENSG00000285022	MFHAS1	0.780221	0.00938949		10.6471	10.6367	9.42346	10.6365	9.58568	10.6571	9.35857	10.3882	9.74951	10.2684	9.53644	10.5964		#N/A
COQ7	ENSG00000167186	COQ7	0.596931	0.00938949		7.68837	8.04628	7.89037	8.42869	7.78717	8.23572	8.34908	8.93228	7.63717	8.38929	7.65852	8.4507		#N/A
CEP295	ENSG00000166004	CEP295	-0.384187	0.00945482		8.7843	8.37435	9.07946	8.64182	9.239	8.58094	9.16573	8.8436	8.92767	8.71121	9.01392	8.75056		#N/A
SRSF3	ENSG00000112081	SRSF3	0.383045	0.00980939		11.5961	11.8808	12.0184	12.4466	12.0794	12.4826	12.1752	12.5938	11.8402	12.1484	11.9424	12.3759		#N/A
STX5	ENSG00000162236	STX5	0.416848	0.00980939		9.07761	9.29431	8.85757	9.32753	8.81593	9.13496	8.68617	9.1179	8.61946	9.00819	8.63241	9.29048		#N/A
SERTAD1	ENSG00000197019	SERTAD1	1.22081	0.00981747		7.3934	7.97066	5.76717	8.13616	6.57659	7.83351	6.22998	7.41619	6.39096	7.02678	5.7197	7.073		#N/A
EHMT1	ENSG00000181090	EHMT1	-0.281636	0.00988716		10.4867	10.1741	10.5596	10.174	10.5072	10.2457	10.5771	10.3739	10.5747	10.0755	10.2857	10.2618		#N/A
PISD	ENSG00000241878	PISD	0.959729	0.01014		10.033	10.1498	9.47648	10.9845	9.76355	11.236	8.90748	10.0612	9.66804	10.045	9.31535	10.3733		#N/A
DEPDC1	ENSG00000024526	DEPDC1	-0.770682	0.01014		8.40594	8.00896	9.22198	8.14396	9.52728	8.61632	9.53045	8.78708	9.22978	8.64562	9.45703	8.65288		#N/A
ADNP2	ENSG00000101544	ADNP2	0.327987	0.0101531		9.58929	9.71258	9.71906	10.0837	9.80574	10.047	9.8169	10.2581	9.40824	9.89782	9.71981	10.0102		#N/A
SLC25A15	ENSG00000102743	SLC25A15	-0.552224	0.0101706		7.84162	7.32379	7.8373	7.39724	8.3964	7.51789	8.35316	7.81147	8.11965	7.65996	8.12489	7.73236		#N/A
TNFRSF12A	ENSG00000006327	TNFRSF12A	1.44781	0.0103148		11.2288	11.6797	9.21507	11.3743	9.44474	11.4716	8.62341	10.7743	10.0312	10.8424	8.76213	10.606		#N/A
NUP58	ENSG00000139496	NUP58	0.268399	0.0103148		10.2305	10.3916	10.1413	10.5065	10.4455	10.5811	10.2399	10.4569	10.0995	10.4591	10.0933	10.474		#N/A
TRIM68	ENSG00000167333	TRIM68	-0.482075	0.0103148		7.71243	7.58517	8.12986	7.35758	7.80996	7.14134	7.76276	7.45299	7.97932	7.66942	8.20247	7.59884		#N/A
TOLLIP	ENSG00000078902	TOLLIP	0.414674	0.0103625		8.54636	9.00856	8.3479	8.88209	8.46501	8.88023	8.33678	8.62883	8.18501	8.6741	8.35689	8.59093		#N/A
MYCL	ENSG00000116990	MYCL	-1.42837	0.0105593		7.25833	6.80729	9.21738	7.68051	7.87625	5.24619	8.2166	7.08216	8.01809	6.83835	8.75943	7.073		#N/A
PEAK1	ENSG00000173517	PEAK1	-0.302774	0.0106234		10.1359	9.88138	10.1678	9.75141	10.2286	9.95923	10.019	9.76012	10.0582	9.7226	10.2592	9.97967		#N/A
CNEP1R1	ENSG00000205423	CNEP1R1	0.529077	0.0108153		7.89864	8.27006	7.42266	8.43187	7.79481	8.37798	7.79309	8.08435	7.73934	8.23856	7.46	7.81898		#N/A
KIAA1549	ENSG00000122778	KIAA1549	-0.509027	0.0108409		9.82998	9.45555	9.5842	9.00912	10.0147	9.44994	10.0229	9.72745	9.92683	9.26998	10.0342	9.41687		#N/A
HERC2	ENSG00000277278	HERC2	-0.361474	0.0109206		10.5996	10.2919	10.8051	10.1901	10.8325	10.4556	10.8795	10.5826	10.6203	10.3835	10.8893	10.5438		#N/A
SOCS5	ENSG00000171150	SOCS5	0.363804	0.010927		8.17735	8.52167	8.40979	9.02187	8.77018	8.89265	8.65348	8.99601	8.2187	8.73843	8.46356	8.71228		#N/A
NYNRIN	ENSG00000205978	NYNRIN	-0.568191	0.0111099		10.6039	10.1908	11.3355	10.617	10.9938	10.3058	10.9659	10.336	11.1293	10.8086	10.8663	10.2066		#N/A
NDE1	ENSG00000275911	NDE1	-0.430459	0.0111354		8.50105	8.01972	8.84866	8.29509	8.9033	8.52352	8.93495	8.43643	8.37624	8.4564	8.5905	7.83688		#N/A
ZNF200	ENSG00000010539	ZNF200	0.452231	0.0113144		7.02219	7.31508	7.27084	7.75873	6.89351	7.48546	7.25343	7.56481	6.93772	7.33091	7.08201	7.6334		#N/A
SGPP2	ENSG00000163082	SGPP2	1.39002	0.0113144		5.39718	5.75864	4.64076	5.96965	5.29171	7.60098	4.89918	6.3041	4.89632	5.0562	4.90558	6.30726		#N/A
AZIN2	ENSG00000142920	AZIN2	-0.929431	0.0113144		5.74685	5.5066	6.12299	5.07531	6.34653	5.76161	6.53286	5.98028	6.86513	5.1672	6.53091	5.53278		#N/A
AKAP1	ENSG00000121057	AKAP1	-0.42241	0.0114349		9.5806	9.50234	9.48992	8.8586	9.74001	9.27754	9.50868	9.0378	9.57844	9.24488	9.90219	9.36023		#N/A
CILK1	ENSG00000112144	CILK1	-0.470834	0.01167		9.23809	9.06938	9.77344	8.83713	9.41779	8.76785	9.4375	9.30263	9.40824	9.07378	9.4369	8.81821		#N/A
RTTN	ENSG00000176225	RTTN	-0.42213	0.01167		8.51479	8.27905	8.50739	8.09655	8.74674	7.90065	8.7648	8.33756	8.31527	8.11246	8.49311	8.07674		#N/A
MIER3	ENSG00000155545	MIER3	0.735351	0.0118978		9.49769	9.79476	9.56256	10.7397	9.50418	10.2697	9.58521	10.1524	10.1451	10.8796	9.6012	10.2717		#N/A
VPS13D	ENSG00000048707	VPS13D	-0.325435	0.0119631		10.2067	10.0002	10.3899	10.0918	10.5597	9.98266	10.1677	9.86897	10.2125	10.0395	10.3589	9.98771		#N/A
ZBTB8A	ENSG00000160062	ZBTB8A	0.893353	0.0119635		6.87369	7.02587	6.8973	8.50933	7.51863	7.81623	7.59385	8.50812	6.91735	7.89584	7.33503	8.36282		#N/A
SDE2	ENSG00000143751	SDE2	0.395814	0.0120719		8.55525	8.79655	8.42985	8.69584	8.35567	8.76785	8.55071	9.04986	8.28777	8.60183	8.14572	8.75056		#N/A
GATA5	ENSG00000130700	GATA5	-1.56163	0.012112		6.17379	5.53688	7.65849	5.82203	8.2706	6.14058	8.61664	6.84802	7.79064	6.99703	8.7862	7.31361		#N/A
SCAF8	ENSG00000213079	SCAF8	0.285265	0.0123623		10.0551	10.3216	10.4362	10.719	10.3567	10.5696	10.4042	10.7866	10.2363	10.4523	10.2725	10.606		#N/A
CAVIN1	ENSG00000177469	CAVIN1	1.95083	0.0126108		11.8846	12.3577	9.3198	12.2943	9.05728	12.0355	7.1541	10.8145	10.9397	11.8652	9.00255	11.0284		#N/A
NUP98	ENSG00000110713	NUP98	0.273712	0.0126585		11.0279	11.1582	11.1142	11.2785	10.9746	11.2562	10.8837	11.2479	10.8076	11.1055	10.9563	11.3588		#N/A
G2E3	ENSG00000092140	G2E3	-0.504422	0.0129766		9.05898	8.76492	9.21044	8.17091	9.34424	8.66057	9.29641	8.87377	9.03555	8.91979	9.27433	8.75998		#N/A
IQCJ-SCHIP1	ENSG00000283154	IQCJ-SCHIP1	1.27223	0.0129766		7.14509	7.15836	5.74173	7.8135	5.91345	7.50716	5.25346	6.28789	6.51814	7.24495	5.39738	7.43612		#N/A
RAB3IP	ENSG00000127328	RAB3IP	0.666398	0.0130948		9.67542	9.86804	10.1714	10.9807	9.96314	10.6265	9.7704	10.2869	9.88286	10.5541	9.97148	10.8866		#N/A
BLZF1	ENSG00000117475	BLZF1	0.465358	0.0131375		8.59891	8.90209	8.06466	8.49721	7.81748	8.44136	7.84613	8.42165	8.28379	8.66467	8.01602	8.49272		#N/A
PMS2	ENSG00000122512	PMS2	-0.349508	0.013179		8.33024	8.0304	8.51867	8.25247	8.73488	8.06332	8.68617	8.30169	8.43115	8.3189	8.40259	8.05651		#N/A
C16orf86	ENSG00000159761	C16ORF86	-1.76373	0.013179		4.4153	2.97397	4.98236	3.09955	4.07861	3.43174	4.65683	3.07258	4.28307	2.41427	3.14892	3.52595		#N/A
AOPEP	ENSG00000148120	AOPEP	0.636888	0.013257		7.71243	8.17218	7.82524	8.43505	7.38335	8.29931	7.04743	7.63054	7.58647	8.08444	7.59936	8.26923		#N/A
CDK8	ENSG00000132964	CDK8	-0.474453	0.0133016		9.29494	8.87568	9.11457	8.66638	9.56796	9.00751	9.27077	8.79283	9.03082	8.61658	8.90821	8.41142		#N/A
SRP14-AS1	ENSG00000248508	SRP14-AS1	-0.742281	0.0133498		6.21926	5.65202	6.21832	5.54435	6.19317	5.76161	6.24761	5.26377	6.28365	5.41226	6.86814	6.18212		#N/A
ENSG00000179066	ENSG00000179066	ENSG00000179066	-2.88713	0.0134223		2.90062	2.31157	5.39521	2.96525	4.89685	2.74768	3.82288	2	3.05256	3.41312	5.50443	2.7697		#N/A
MIS18BP1	ENSG00000129534	MIS18BP1	-0.579032	0.0134654		9.54533	9.10013	10.169	9.48614	10.1218	9.29948	10.2563	9.69863	9.94204	9.64081	10.3255	9.68905		#N/A
ENSG00000238142	ENSG00000238142	ENSG00000238142	-1.51204	0.0134921		4.06298	3.14098	3.94723	3.33562	4.26609	3.60277	3.99975	2.73285	4.57079	3.41312	5.25131	3.63911		#N/A
IBA57	ENSG00000181873	IBA57	0.643965	0.0136095		6.28489	7.66273	7.12101	7.38414	6.72786	7.59086	6.51841	7.51695	7.08196	7.25754	7.03814	7.29646		#N/A
EXD2	ENSG00000081177	EXD2	-0.356513	0.0137777		8.87943	8.65534	9.01188	8.58284	8.8891	8.47479	8.93767	8.59959	9.04497	8.76073	8.77288	8.32948		#N/A
RHPN2	ENSG00000131941	RHPN2	0.8104	0.0138758		9.26544	9.61484	9.65235	10.5766	9.09797	10.1193	8.67969	9.32464	9.26647	9.96658	9.02969	10.0982		#N/A
ETF1	ENSG00000120705	ETF1	0.397596	0.0138998		11.1199	11.245	10.9846	11.42	10.7247	11.1982	10.6764	11.1273	10.749	11.063	10.7199	11.3238		#N/A
ABCF1	ENSG00000236149	ABCF1	0.258781	0.01423		10.7132	10.9069	10.8864	11.0957	10.8491	11.1316	10.8181	11.0283	10.6955	11.0044	10.8719	11.2076		#N/A
RHPN1-AS1	ENSG00000254389	RHPN1-AS1	-1.36455	0.0143844		4.63254	3.29064	4.33527	3.87449	4.50829	3.75566	5.56604	3.77696	4.51765	3.58292	3.9414	3.40316		#N/A
DOK3	ENSG00000146094	DOK3	0.851855	0.0143885		6.72399	7.635	5.79218	6.28367	5.63582	6.7626	5.7991	6.91286	6.34594	6.4782	6.01956	6.89076		#N/A
SH2D3A	ENSG00000125731	SH2D3A	1.12952	0.014423		8.82899	9.12026	7.95268	9.54029	7.29994	9.18631	6.98574	8.26076	8.28777	8.76073	7.41954	8.80007		#N/A
ATM	ENSG00000149311	ATM	-0.294722	0.0145981		10.0234	9.80568	10.0868	9.76031	9.92014	9.6461	10.1266	9.7935	10.0847	9.90184	10.34	9.93605		#N/A
AFF1	ENSG00000172493	AFF1	0.962116	0.0146707		10.9947	11.5447	10.5246	12.018	10.273	11.5037	9.89449	10.4441	10.5484	11.2622	9.9773	10.9775		#N/A
REPIN1	ENSG00000214022	REPIN1	-0.274569	0.0146707		10.9054	10.6411	11.0721	10.6706	11.1147	10.8112	10.9165	10.8529	11.1702	10.7684	11.0072	10.8093		#N/A
ZNF827	ENSG00000151612	ZNF827	0.436285	0.0146707		10.0676	9.98796	9.97113	10.6212	9.88658	10.7534	10.042	10.3191	9.871	10.1702	9.86626	10.4087		#N/A
CC2D1B	ENSG00000154222	CC2D1B	0.440208	0.0146707		9.31603	9.50808	9.23344	9.81259	8.98234	9.55526	8.92128	9.32266	8.97525	9.31286	8.95143	9.48089		#N/A
RPS6KA6	ENSG00000072133	RPS6KA6	-0.381799	0.0146707		8.06976	7.59239	8.56655	8.13616	8.46022	8.18949	8.54002	8.18404	8.40213	7.92772	8.31338	8.0616		#N/A
MTMR9LP	ENSG00000220785	MTMR9LP	-0.528139	0.0146707		7.76703	7.45644	7.66527	7.34411	7.70038	7.05557	8.26934	7.4457	7.94953	7.36625	7.65271	7.28781		#N/A
IRAG1	ENSG00000072952	IRAG1	-0.589677	0.0146707		6.81566	6.12036	7.52316	6.72924	7.15319	6.68855	7.51598	6.94422	6.91735	6.62155	7.33503	6.75925		#N/A
NPTN-IT1	ENSG00000281183	NPTN-IT1	0.594506	0.0147158		6.30612	6.71761	5.71583	6.36593	5.66944	5.99457	5.25346	6.07776	6.04164	6.45651	6.22137	6.89076		#N/A
TENT5B	ENSG00000158246	TENT5B	0.96225	0.0147175		6.32704	6.23561	6.72623	8.24161	7.15319	7.86747	6.78305	7.77705	6.97762	7.77835	6.61694	7.87204		#N/A
PIK3R1	ENSG00000145675	PIK3R1	0.718811	0.0147721		10.3154	10.8635	9.9421	11.2535	10.2689	11.06	10.8674	11.1776	10.3269	11.0746	9.5661	10.335		#N/A
AGFG1	ENSG00000173744	AGFG1	0.346244	0.0148222		10.2983	10.4584	10.123	10.5916	10.1725	10.4914	10.0152	10.3101	10.0193	10.3471	9.83455	10.3527		#N/A
ORAI3	ENSG00000175938	ORAI3	-0.839712	0.0148222		6.7552	6.70433	7.11111	5.78263	7.40347	5.8993	6.88795	5.78629	7.02599	6.88781	6.8979	6.12498		#N/A
TTC13	ENSG00000143643	TTC13	0.418167	0.014878		8.68651	8.88454	8.2964	8.99627	8.4064	9.19971	8.7525	8.92444	8.65064	8.95889	8.42661	8.78478		#N/A
GKAP1	ENSG00000165113	GKAP1	-0.785308	0.0148825		6.21926	5.34487	6.97579	6.32539	7.06752	6.3711	7.58695	6.65937	6.60985	6.21949	7.04702	6.14428		#N/A
SUCO	ENSG00000094975	SUCO	0.579558	0.0149895		11.6583	11.9162	12.1674	12.8897	11.5878	12.1559	11.8555	12.2696	11.7398	12.3654	11.6971	12.4719		#N/A
UBALD1	ENSG00000153443	UBALD1	0.473798	0.0149895		8.68246	9.11526	8.54832	8.89138	8.4064	8.82081	8.1337	8.87649	8.48405	8.61168	8.14158	8.91127		#N/A
ELF3	ENSG00000163435	ELF3	1.00002	0.0150204		9.94947	10.1313	10.3164	11.6194	9.88837	10.9991	8.98835	10.3291	9.49327	10.2575	9.85239	11.0173		#N/A
GNL1	ENSG00000229470	GNL1	0.43912	0.0151795		10.3906	10.4594	10.0419	10.6787	10.1711	10.6227	9.93449	10.565	10.0442	10.1685	9.85619	10.5894		#N/A
BLACAT1	ENSG00000281406	BLACAT1	-0.888644	0.0152388		8.96534	8.23817	8.51492	7.51009	8.29773	7.24831	9.21137	8.24406	8.76904	8.1868	8.37816	7.29646		#N/A
TXLNA	ENSG00000084652	TXLNA	0.264097	0.0155035		10.2607	10.4152	10.3346	10.6072	10.3822	10.5888	10.1826	10.6735	10.2093	10.3368	10.2997	10.6129		#N/A
FBXW12	ENSG00000164049	FBXW12	1.55235	0.0155826		3.45087	5.3787	3.53815	4.93862	2.37082	4.24336	3.25356	3.57809	4.21794	5.11277	3.9414	4.51081		#N/A
ADIPOR2	ENSG00000285070	ADIPOR2	0.322299	0.0159867		10.2166	10.404	10.145	10.469	10.2001	10.7736	10.149	10.4441	10.0938	10.2992	10.2621	10.5752		#N/A
CWC25	ENSG00000276761	CWC25	0.369609	0.0159867		8.52841	8.89334	8.51867	9.09605	8.3964	8.64107	8.59615	9.0784	8.64755	8.93556	8.67886	8.87707		#N/A
LINC02210	ENSG00000204650	LINC02210	-0.65408	0.0160092		8.36606	7.92559	8.82765	7.98817	9.01213	8.2551	9.0449	8.67317	9.04966	8.40636	8.53159	7.62655		#N/A
ATF4	ENSG00000128272	ATF4	0.431835	0.0165356		12.2404	12.5743	11.8574	12.1289	11.671	12.2242	11.718	12.3957	11.8966	12.0536	11.7684	12.3515		#N/A
MKKS	ENSG00000125863	MKKS	-0.488923	0.0165356		7.16846	6.98252	7.3403	6.71885	7.6423	6.85013	7.66774	7.04407	7.07278	6.76964	7.22975	6.91343		#N/A
TRIM39	ENSG00000224994	TRIM39	0.56826	0.0165441		7.47064	8.08265	7.10114	7.75364	6.75943	7.52855	7.34636	7.50298	7.04489	7.71581	7.02021	7.50492		#N/A
SERPINB8	ENSG00000166401	SERPINB8	1.65749	0.0165891		8.47317	9.31411	6.44018	8.47576	6.30435	8.67981	5.70013	7.75953	7.06355	8.13994	5.34071	7.56344		#N/A
EPS15L1	ENSG00000127527	EPS15L1	-0.310615	0.0165891		9.37246	9.16699	9.3198	8.9052	9.36747	8.92122	9.27293	9.14063	9.21525	9.02671	9.31535	8.81821		#N/A
ENSG00000279133	ENSG00000279133	ENSG00000279133	1.66757	0.0168306		2	4.34994	3.41478	5.13909	3.46391	4.75963	3.72559	5.32858	3.32417	4.31948	4.33864	4.92204		#N/A
ENSG00000277534	ENSG00000277534	ENSG00000277534	0.907441	0.0169285		6.30612	6.89172	7.22567	8.10456	6.38752	7.50716	5.89171	7.25882	6.75466	7.27003	6.18963	7.20752		#N/A
DICER1-AS1	ENSG00000235706	DICER1-AS1	-1.23336	0.0169743		5.94932	4.90855	6.59028	5.34242	6.6288	4.34327	6.84227	5.66606	6.60985	5.93574	7.35663	6.43812		#N/A
SAR1A	ENSG00000079332	SAR1A	0.296409	0.0171148		10.8423	11.0456	10.5678	11.0404	10.6697	10.9335	10.477	10.7736	10.7273	10.8663	10.5569	10.9531		#N/A
TENT5A	ENSG00000112773	TENT5A	1.1221	0.0171348		9.61077	10.0509	9.6944	11.1186	9.10106	10.347	8.36532	10.1276	9.82936	10.4821	8.1945	9.87671		#N/A
ZNF26	ENSG00000198393	ZNF26	0.477531	0.0171348		7.55286	8.15276	7.72492	8.26324	7.45257	7.87584	7.40252	7.77123	7.84557	8.11246	7.3779	7.99406		#N/A
TIFA	ENSG00000145365	TIFA	-0.535006	0.0171348		6.34766	5.92814	6.70004	6.08749	6.85018	6.08394	6.92129	6.4127	6.25146	5.73413	6.46616	6.18212		#N/A
EHD4	ENSG00000103966	EHD4	0.800746	0.0171738		9.83729	10.064	8.45355	10.0561	8.73488	9.80568	8.66992	9.30465	9.09571	9.42042	8.7994	9.7627		#N/A
BCAS2	ENSG00000116752	BCAS2	0.247277	0.0171738		8.89352	9.22626	8.85757	9.0697	8.92086	9.08171	8.99359	9.21322	8.83297	9.15009	8.96789	9.19423		#N/A
RIF1	ENSG00000080345	RIF1	0.364933	0.0171788		10.468	10.8813	10.5321	11.1156	10.678	10.9375	10.8026	11.1324	10.5081	10.9018	10.8906	11.1256		#N/A
MRPL34	ENSG00000130312	MRPL34	-0.339687	0.0172189		8.14237	7.85525	7.96373	7.44849	7.95334	7.6408	8.00486	7.6241	7.93441	7.62149	8.02953	7.81296		#N/A
ZMYM6	ENSG00000163867	ZMYM6	0.443556	0.0172189		7.34294	7.58517	7.07081	7.75873	6.93556	7.33582	7.10659	7.48177	7.34857	7.64085	6.96504	7.54177		#N/A
RAD23B	ENSG00000119318	RAD23B	0.544392	0.0173298		12.8315	13.0067	12.7476	13.5886	12.5638	13.1105	12.3339	12.8251	12.5912	13.0271	12.2458	13.0035		#N/A
DOLK	ENSG00000175283	DOLK	0.372626	0.0173298		8.12456	8.26555	8.1445	8.21226	8.07749	8.67022	8.01519	8.46913	7.91399	8.42882	7.86348	8.29104		#N/A
ENSG00000269680	ENSG00000269680	ENSG00000269680	1.71267	0.0173701		2.90062	4.20661	3.75714	4.86509	2.66556	5.19362	3.10674	4.10755	2.89481	2.99847	3.27524	4.01957		#N/A
SH3BP2	ENSG00000087266	SH3BP2	0.303462	0.0174536		9.89797	10.0562	9.50701	10.0988	9.74593	10.1246	9.87618	10.0624	9.74951	9.90984	9.70866	10.0657		#N/A
LRRIQ3	ENSG00000162620	LRRIQ3	-1.48275	0.0174536		4.69825	3.55015	4.89273	3.71623	5.10775	3.89388	4.48911	2.91269	3.44293	3.73482	4.98167	3.40316		#N/A
SPRYD3	ENSG00000167778	SPRYD3	-0.348621	0.0181174		9.06522	8.73911	8.95766	8.55681	8.90683	8.22921	8.85669	8.46193	8.7944	8.6741	9.00938	8.8152		#N/A
CSRP1	ENSG00000159176	CSRP1	0.941757	0.0181936		11.9851	12.1945	10.9482	12.1252	10.4296	11.9224	9.94399	11.1499	11.6523	12.0963	10.6545	12.0721		#N/A
HMG20A	ENSG00000140382	HMG20A	-0.331297	0.0187701		9.14396	8.74236	9.21968	8.88906	9.38528	9.03017	9.37069	9.04986	9.02131	8.97424	9.40789	8.9197		#N/A
ENSG00000228801	ENSG00000228801	ENSG00000228801	-0.854556	0.0191499		7.20282	6.62199	6.60447	5.5907	6.19317	5.34592	6.93223	5.87574	7.03547	5.99713	6.22137	5.96053		#N/A
VLDLR	ENSG00000147852	VLDLR	0.829026	0.0191561		9.20739	9.25842	8.02302	8.81289	8.30309	9.30877	8.86243	9.85392	9.31789	9.857	8.54105	10.0504		#N/A
SIRT1	ENSG00000096717	SIRT1	0.370675	0.0191561		8.51935	8.72931	8.67471	9.16661	8.81593	8.99988	9.00917	9.46277	8.37251	8.78704	8.45358	8.87129		#N/A
BOLA3-AS1	ENSG00000225439	BOLA3-AS1	-0.814192	0.0191711		5.27331	5.3787	6.39193	5.91605	6.72786	5.48366	6.77091	6.07776	6.44887	5.1672	6.35612	5.56177		#N/A
RAP1B	ENSG00000127314	RAP1B	0.471217	0.0193689		10.927	11.0574	10.9689	11.4184	11.2507	11.7997	10.751	11.4411	10.6842	11.1793	10.3792	10.9379		#N/A
RBMS1	ENSG00000153250	RBMS1	0.311426	0.0196045		11.4847	11.5751	10.9614	11.3476	10.9905	11.4529	10.8717	11.1284	11.1382	11.5205	11.2037	11.4984		#N/A
NFXL1	ENSG00000170448	NFXL1	0.362206	0.0196657		8.93159	8.8608	8.7372	9.30337	8.80841	9.36632	8.75558	9.16967	8.53507	8.91979	8.58745	8.89996		#N/A
DSTNP1	ENSG00000230982	DSTNP1	0.723731	0.019883		4.87912	6.12036	5.02517	6.10356	4.95254	5.76161	5.53766	5.76303	5.29403	5.73413	5.4519	5.72448		#N/A
CMTM8	ENSG00000170293	CMTM8	-0.793883	0.0199759		5.22954	4.4803	5.97798	4.66299	5.76585	5.08235	5.75046	4.92963	5.52697	4.87182	5.28173	5.24168		#N/A
IDI1	ENSG00000067064	IDI1	0.521627	0.0200326		10.0025	10.5715	9.65235	10.6058	10.3385	10.7002	9.86481	10.115	9.70415	10.2606	9.9444	10.3916		#N/A
XYLT2	ENSG00000015532	XYLT2	-0.496273	0.020037		9.68152	9.15728	9.35589	8.89369	9.67529	9.2807	9.03985	8.80712	9.6847	8.84245	9.44028	8.9611		#N/A
MDFIC	ENSG00000135272	MDFIC	-0.629547	0.0201988		8.11256	7.48	8.69805	8.0011	8.63632	8.04859	8.81296	8.10762	8.786	8.4781	8.82287	7.98339		#N/A
AP1G1	ENSG00000166747	AP1G1	0.323752	0.0202834		11.039	11.3832	11.0148	11.3702	11.0282	11.3288	10.8408	11.0668	10.8679	11.1492	10.7302	11.1515		#N/A
CYP1B1	ENSG00000138061	CYP1B1	3.20462	0.0203802		6.67588	10.8394	6.98666	12.197	7.06752	7.99583	5.38672	5.93937	7.85095	7.91982	7.00206	7.31361		#N/A
BAIAP2	ENSG00000175866	BAIAP2	0.760439	0.0203956		9.04642	9.41333	9.05125	10.2013	8.60625	9.84456	8.40514	9.08311	9.21525	9.44266	8.59353	9.3969		#N/A
ING4	ENSG00000111653	ING4	-0.491128	0.0204871		8.22828	7.53354	8.54832	8.02662	7.9188	7.80751	8.57186	7.96713	8.25972	7.92772	8.45358	7.88357		#N/A
ZC3H6	ENSG00000188177	ZC3H6	-0.780657	0.0204871		7.46121	6.83192	7.94155	7.08547	8.11458	6.68855	8.32852	7.59146	7.89328	7.6312	8.33166	7.54177		#N/A
ZBTB43	ENSG00000169155	ZBTB43	0.408851	0.020665		8.35082	9.08484	8.48072	9.08395	8.66577	8.91312	8.68617	8.91656	8.72577	8.96659	8.27609	8.66295		#N/A
EPN3	ENSG00000049283	EPN3	-0.939179	0.0207892		7.82701	6.99348	9.28939	8.62243	9.02842	7.83351	8.53644	7.33177	8.75763	7.97427	8.76752	7.71311		#N/A
DSE	ENSG00000111817	DSE	0.628825	0.0209737		10.0282	10.2411	9.72557	10.6807	9.49013	10.0691	9.10175	9.6894	9.68621	10.2354	9.67037	10.45		#N/A
EIF3J	ENSG00000104131	EIF3J	0.273345	0.0210583		10.2443	10.4233	10.0652	10.4145	10.2201	10.5144	10.1895	10.4164	9.93572	10.2746	10.2155	10.4721		#N/A
CEP162	ENSG00000135315	CEP162	-0.433318	0.0210583		8.29351	7.80637	8.54097	8.27038	8.51673	8.04859	8.82768	8.49759	8.57788	7.91982	8.55669	8.16915		#N/A
RNF135	ENSG00000181481	RNF135	-0.772411	0.0211984		6.88784	6.56436	7.0911	6.02134	7.25635	6.08394	6.75867	5.80918	7.24613	6.78712	6.45286	6.02442		#N/A
FASTKD1	ENSG00000138399	FASTKD1	-0.356437	0.0213517		8.45902	8.16251	8.74042	8.33988	8.70277	8.21609	8.61664	8.21007	8.4596	8.36621	8.82287	8.41539		#N/A
TFAP2C	ENSG00000087510	TFAP2C	1.02107	0.0215254		8.48718	9.17424	9.51642	10.5475	8.21476	9.52633	8.1098	9.33454	9.02845	10.023	8.8306	9.74068		#N/A
KCNJ10	ENSG00000177807	KCNJ10	-1.81529	0.0215254		6.28489	4.20661	6.97579	4.74726	8.31376	5.86609	8.65348	7.19073	8.13296	6.76964	7.09063	5.09069		#N/A
GAS2L3	ENSG00000139354	GAS2L3	-0.805984	0.0215254		7.3934	7.05754	8.39762	7.08547	8.65741	7.85059	8.63685	7.8616	8.37624	7.93559	8.32072	7.18906		#N/A
SLC20A1	ENSG00000144136	SLC20A1	0.889081	0.0216625		10.9608	11.5188	9.72881	11.1758	9.77325	11.0134	9.90007	10.4587	9.72188	10.3978	9.93246	10.7726		#N/A
PRUNE1	ENSG00000143363	PRUNE1	-0.41214	0.0216625		8.46376	8.00355	8.67807	8.11253	8.91736	8.48576	8.94309	8.648	8.57788	8.2575	8.68741	8.2867		#N/A
GLRX2	ENSG00000023572	GLRX2	0.629878	0.0216625		7.27995	7.84318	6.57596	7.82324	7.45257	7.90882	6.79509	7.33965	7.02599	7.62149	7.10771	7.44393		#N/A
NNT-AS1	ENSG00000248092	NNT-AS1	-0.588609	0.0216625		7.29064	6.73077	7.24391	6.31161	7.50938	7.0258	7.35452	6.63396	7.16206	7.1125	7.15777	6.39043		#N/A
RBM23	ENSG00000100461	RBM23	0.313821	0.0218432		9.79849	10.0245	9.91105	10.1529	9.96483	10.3318	10.0965	10.4257	9.85502	10.0773	9.92526	10.3855		#N/A
BCL2L11	ENSG00000153094	BCL2L11	-0.654365	0.0218432		9.31341	9.11023	9.87347	8.31593	9.96483	9.3957	9.9304	9.21322	9.48983	9.21935	9.5126	8.68618		#N/A
DBT	ENSG00000137992	DBT	-0.413944	0.0218432		8.64962	8.29242	9.10961	8.5971	8.92782	8.2551	8.88231	8.50812	8.78318	8.58693	9.04085	8.67958		#N/A
ENSG00000260401	ENSG00000260401	ENSG00000260401	-0.916859	0.0218711		7.82701	7.30632	9.1561	8.14396	8.62351	7.27386	7.90286	6.85903	7.89328	7.55159	8.30969	7.1514		#N/A
TTC30A	ENSG00000197557	TTC30A	-0.676851	0.0218711		7.07261	6.64996	7.89037	6.8293	7.86178	7.08473	8.20762	7.22518	7.35616	7.43441	7.46	6.60063		#N/A
RBM33	ENSG00000184863	RBM33	-0.273699	0.0219675		10.414	10.2864	10.6496	10.2336	10.6749	10.1524	10.5936	10.5181	10.4867	10.1999	10.5412	10.3031		#N/A
TACC3	ENSG00000013810	TACC3	-0.335072	0.0222027		10.4335	10.1849	10.9954	10.5475	10.8727	10.4914	11.0322	10.7866	10.5608	10.2854	10.8307	10.4314		#N/A
ATP13A3	ENSG00000133657	ATP13A3	0.338001	0.0223975		10.5415	10.7773	10.4734	11.0162	10.8213	10.9325	10.4629	10.9481	10.4464	10.8171	10.748	11.0515		#N/A
SLC45A4	ENSG00000022567	SLC45A4	-0.572209	0.0223975		8.78052	8.24735	8.57378	8.09253	9.21644	8.42435	9.01691	8.55627	8.49783	7.83829	8.98417	8.50396		#N/A
FAM167B	ENSG00000183615	FAM167B	-0.875508	0.0223975		5.83712	5.47567	5.57885	4.37589	5.7023	4.75963	5.84614	5.12472	6.15036	5.1672	5.31153	4.73103		#N/A
ENPP4	ENSG00000001561	ENPP4	-0.446748	0.0224111		6.70813	6.17914	7.35715	6.7701	7.44289	6.86701	7.53045	7.21664	6.55816	6.36632	6.66389	6.2726		#N/A
EBLN3P	ENSG00000281649	EBLN3P	-0.266669	0.0224863		9.70768	9.46346	9.69937	9.47383	9.81328	9.30258	9.72077	9.51591	9.71305	9.63599	9.92766	9.59224		#N/A
SAP30	ENSG00000164105	SAP30	-0.598079	0.0224863		7.04762	6.76954	7.37381	6.2407	7.54604	6.70742	7.60757	7.19073	7.17069	6.56185	7.11618	6.77171		#N/A
HOXD4	ENSG00000170166	HOXD4	-1.57296	0.0226454		3.9596	2.31157	4.46533	3.53844	4.77859	4.136	5.64798	4.17958	4.34539	3.87224	5.01827	3.12092		#N/A
GRWD1	ENSG00000105447	GRWD1	0.40599	0.0226683		9.14984	9.30973	8.96042	9.15509	8.90683	9.37519	8.78908	9.40008	8.65064	9.10896	9.02295	9.54583		#N/A
SMAD3	ENSG00000166949	SMAD3	1.08579	0.0227126		11.2867	11.5344	9.92666	11.9874	10.2044	12.0134	10.0049	10.9273	10.4401	11.1501	9.81128	10.551		#N/A
AFG3L2	ENSG00000141385	AFG3L2	0.242887	0.0227126		9.08684	9.48885	9.1776	9.38455	9.20788	9.47769	9.29004	9.36575	9.08433	9.34273	9.03862	9.27306		#N/A
ALG2	ENSG00000119523	ALG2	0.370419	0.0227326		8.50565	8.93373	8.2964	8.8491	8.45058	8.80775	8.39726	8.47272	8.33076	8.82563	8.31338	8.55893		#N/A
TLE4	ENSG00000106829	TLE4	0.709894	0.022993		10.0362	10.3916	9.05384	10.0457	9.31798	10.1228	9.22923	10.0238	9.60256	10.1785	8.7513	9.65917		#N/A
DCAF1	ENSG00000145041	DCAF1	0.412049	0.023014		9.47209	9.94344	9.87786	10.1548	9.81703	10.2064	9.88747	10.3399	9.38247	9.98374	9.97148	10.287		#N/A
STRN3	ENSG00000196792	STRN3	0.35825	0.0230919		9.4292	9.75506	9.40736	9.67548	9.32327	9.75215	9.35451	9.67701	9.12487	9.61656	9.01392	9.3077		#N/A
ENSG00000255337	ENSG00000255337	ENSG00000255337	-1.38987	0.0230919		3.72754	3.96078	4.52621	3.79753	4.43199	2.74768	4.85386	3.21651	5.19597	4.11312	4.90558	3.52595		#N/A
ENSG00000233836	ENSG00000233836	ENSG00000233836	-0.67191	0.023178		7.89864	7.15836	8.60939	7.9968	8.83828	7.80751	8.28649	8.30572	8.27981	7.1125	8.50927	7.95634		#N/A
CLASP1	ENSG00000074054	CLASP1	-0.294509	0.0232347		10.7877	10.5503	10.8623	10.3901	10.9031	10.6015	11.0341	10.7553	10.9065	10.5426	10.6399	10.5283		#N/A
ENSG00000284052	ENSG00000284052	ENSG00000284052	1.1721	0.0237172		4.63254	5.78411	5.63521	6.92286	4.43199	6.54904	4.98577	5.91847	5.05391	5.41226	5.76347	6.51427		#N/A
MNT	ENSG00000070444	MNT	0.479574	0.0239185		9.0807	9.31411	8.98231	9.38948	8.99566	9.1694	9.12816	9.99535	9.05666	9.51002	8.9155	9.50349		#N/A
C1GALT1	ENSG00000106392	C1GALT1	0.579527	0.0240553		9.20174	9.19575	9.59844	10.4798	9.71407	10.1122	9.25124	9.92898	9.42096	9.95502	8.91792	9.8103		#N/A
SRP19	ENSG00000153037	SRP19	0.43744	0.024091		7.35317	7.45644	6.8143	7.6965	6.86477	7.42973	7.14473	7.33177	7.15338	7.44547	7.16595	7.6738		#N/A
NUFIP2	ENSG00000108256	NUFIP2	0.26417	0.0242065		11.255	11.6106	11.2557	11.8062	11.3596	11.5231	11.3667	11.5261	11.3305	11.6396	11.4613	11.4928		#N/A
TCF20	ENSG00000262024	TCF20	-0.29456	0.0242065		10.3349	10.3216	10.5237	10.1058	10.5302	10.0998	10.2726	10.0456	10.3697	10.1619	10.6274	10.1881		#N/A
TMCC3	ENSG00000057704	TMCC3	1.06832	0.0242065		8.15413	8.61333	8.19224	9.65654	7.22278	8.05597	7.19102	8.28546	7.45839	8.10551	7.46664	8.95291		#N/A
FBXO44	ENSG00000132879	FBXO44	-0.523953	0.0242065		8.76527	8.23355	7.99098	7.77889	8.18601	7.91695	8.31186	7.81712	8.6932	7.96661	8.39217	7.48235		#N/A
TP73	ENSG00000078900	TP73	-1.07677	0.0242065		5.35706	3.96078	6.88573	5.39561	6.44688	5.64898	6.69584	5.61502	6.463	5.83845	6.35612	5.47297		#N/A
TATDN2P2	ENSG00000218226	TATDN2P2	0.794845	0.0242065		6.32704	6.35937	5.22203	6.55315	4.83894	5.93176	4.98577	5.73939	6.0035	6.3894	6.01956	6.80847		#N/A
GMEB2	ENSG00000101216	GMEB2	0.453948	0.024421		8.20021	8.45585	8.26102	8.61404	8.07122	8.23572	8.22997	8.74021	7.92424	8.31288	7.75924	8.71551		#N/A
C2orf42	ENSG00000115998	C2ORF42	0.521454	0.0244559		6.59194	7.07828	6.77721	6.95865	6.80552	7.35987	7.02716	7.53766	6.42021	7.05592	6.78563	7.41244		#N/A
VCL	ENSG00000035403	VCL	0.969666	0.024707		12.917	13.1874	11.4005	12.8421	11.4871	12.7297	10.9565	11.9067	12.0095	12.6384	11.1072	12.7639		#N/A
GRHL3	ENSG00000158055	GRHL3	1.24905	0.0247744		8.82899	9.2493	9.42745	11.0987	8.86754	9.61895	8.06078	8.81844	8.57463	9.77174	7.50582	9.76738		#N/A
CDC42EP1	ENSG00000128283	CDC42EP1	1.19282	0.0247744		10.812	11.0979	8.60234	10.2839	9.08557	10.7084	8.04575	9.86897	9.56213	10.4162	8.7211	10.2651		#N/A
LZTS2	ENSG00000107816	LZTS2	0.281555	0.0247744		10.7639	10.9872	10.8901	11.2634	10.6903	11.0526	10.8444	11.0405	10.6289	10.8445	10.8282	11.1293		#N/A
CCNB1	ENSG00000134057	CCNB1	-0.436176	0.0247744		10.13	9.75345	10.5983	9.80892	10.7602	10.4626	10.6158	10.2169	10.2598	9.88163	10.5119	10.0895		#N/A
RNF26	ENSG00000173456	RNF26	-0.367726	0.0247744		9.32385	8.91656	9.67101	9.15123	9.77711	9.16599	9.83742	9.44096	9.36189	9.22898	9.47689	9.31836		#N/A
PNPLA8	ENSG00000135241	PNPLA8	0.393125	0.0247744		8.73428	9.03532	9.09461	9.49074	8.70682	9.10681	8.67969	9.23451	8.51149	9.08088	8.82545	8.96381		#N/A
CMYA5	ENSG00000164309	CMYA5	1.29224	0.0247744		6.02809	6.75673	7.57451	8.97239	5.94124	7.47448	6.64354	7.11926	6.58424	8.02673	6.65229	8.10657		#N/A
MRPL10	ENSG00000159111	MRPL10	-0.24395	0.0247744		9.61503	9.29652	9.61955	9.40416	9.5635	9.33935	9.50319	9.2555	9.37875	9.26998	9.62364	9.28832		#N/A
RNFT1	ENSG00000189050	RNFT1	0.646313	0.0247744		7.43253	7.89085	6.78968	7.90348	7.1884	7.70794	7.05746	7.75364	7.58	7.82988	6.54352	7.4671		#N/A
BTBD8	ENSG00000189195	BTBD8	-0.825292	0.0247744		6.73968	6.21703	6.75194	6.32539	7.01617	4.89749	6.50381	5.87574	6.34594	5.96676	6.60496	5.56177		#N/A
SPTB	ENSG00000070182	SPTB	0.955962	0.0247744		5.89431	6.37622	4.40176	5.65756	4.07861	5.8993	4.75871	5.42063	5.19597	6.08458	5.25131	5.41058		#N/A
ENSG00000261534	ENSG00000261534	ENSG00000261534	-1.33018	0.0247744		4.98821	3.77003	4.93824	3.22241	4.26609	3.89388	4.65683	3.86697	5.35588	3.73482	3.78029	3.74403		#N/A
PPL	ENSG00000118898	PPL	1.02939	0.0252162		11.5529	11.6613	10.9914	12.5227	10.8371	12.4483	10.123	11.1616	11.1524	11.7978	10.1304	11.4657		#N/A
TAB1	ENSG00000100324	TAB1	-0.403419	0.0252162		9.07452	8.62747	9.5239	8.91889	9.20215	8.91312	9.2556	9.03537	9.31789	8.89178	9.51099	9.11085		#N/A
CCNF	ENSG00000162063	CCNF	-0.577488	0.0252162		8.1831	8.21495	9.02249	8.28102	9.2362	8.74062	9.09689	8.44376	8.9504	8.2258	9.19264	8.49272		#N/A
SBDSP1	ENSG00000225648	SBDSP1	0.584496	0.0252162		7.42285	7.9872	6.8973	7.49797	6.94932	7.52855	6.91026	7.37843	6.69608	7.2947	6.81713	7.38836		#N/A
BOLA1	ENSG00000178096	BOLA1	-0.899126	0.0252162		4.87912	4.59986	6.18094	5.47189	5.91345	5.02333	5.4182	4.97082	5.92405	4.80473	5.62797	4.45007		#N/A
VGLL3	ENSG00000206538	VGLL3	1.75455	0.0254326		10.6273	11.1515	8.2339	10.8805	7.02918	9.49408	6.63016	8.76676	9.32757	10.6239	7.59331	9.74858		#N/A
GPD2	ENSG00000115159	GPD2	-0.259948	0.0254326		9.4048	9.21226	9.43144	9.26279	9.54324	9.04879	9.26645	9.09945	9.43177	9.2512	9.48672	9.13276		#N/A
EME2	ENSG00000197774	EME2	0.42758	0.0254326		7.32225	7.9651	7.75066	8.21966	7.43313	7.93308	7.53764	7.95692	7.89328	7.97427	7.51865	7.99406		#N/A
PEX11A	ENSG00000166821	PEX11A	-0.724441	0.0254326		5.68337	5.34487	6.61852	5.89773	6.96294	6.16809	6.87667	6.13323	6.74313	5.99713	6.54352	5.96053		#N/A
ARAP2	ENSG00000047365	ARAP2	1.08326	0.0254541		8.89001	9.29209	7.73785	9.70344	7.99371	9.54743	7.90286	8.34149	8.41671	9.49945	7.48636	8.1454		#N/A
DENND2D	ENSG00000162777	DENND2D	-1.39812	0.0254541		3.45087	3.86855	5.63521	4.32195	5.24787	4.02002	5.56604	3.68095	5.09076	4.31948	5.82673	4.38666		#N/A
LARP4B	ENSG00000107929	LARP4B	0.412962	0.0256774		10.592	10.8761	10.3692	10.927	10.4061	10.9553	10.1838	10.4396	10.3016	10.5969	10.1947	10.6905		#N/A
RTCA-AS1	ENSG00000224616	RTCA-AS1	-0.798558	0.0257231		6.87369	6.37622	6.88573	6.44376	6.64579	5.96351	7.68725	6.79167	7.19628	6.29477	7.65852	6.62831		#N/A
THAP2	ENSG00000173451	THAP2	-0.939734	0.0257231		5.83712	5.97312	6.57596	5.74213	7.05485	5.60939	7.55898	6.11497	6.79987	6.16703	7.11618	6.3411		#N/A
BTG2	ENSG00000159388	BTG2	-1.05214	0.0258046		10.6922	10.62	12.506	11.3311	12.1867	10.4514	11.3258	10.3011	12.0773	11.455	11.9123	10.3733		#N/A
SAP30BP	ENSG00000161526	SAP30BP	0.358631	0.0258767		10.0614	10.4731	9.85283	10.3794	9.63756	10.1351	9.84032	10.06	9.98671	10.063	9.80474	10.1823		#N/A
DLC1	ENSG00000164741	DLC1	1.02966	0.0258821		10.7475	11.3253	9.52016	11.0881	8.94851	10.1575	8.71497	9.89862	9.97444	10.7032	9.40444	10.2384		#N/A
MAP3K4	ENSG00000085511	MAP3K4	-0.394949	0.0258821		10.0234	9.70093	10.7543	10.0827	10.8509	10.2996	10.7709	10.4686	10.2146	9.98942	10.4336	10.1252		#N/A
ENSG00000254461	ENSG00000254461	ENSG00000254461	0.777523	0.0258821		4.87912	5.56654	4.79715	5.89773	5.29171	5.5268	5.53766	5.61502	4.46249	5.45665	4.44998	5.61807		#N/A
PRKCQ-AS1	ENSG00000237943	PRKCQ-AS1	-0.712544	0.0261553		6.12684	5.27473	6.45591	5.93414	6.2161	5.60939	6.70863	5.95997	6.0788	5.0562	6.50536	6.0451		#N/A
PRKACB	ENSG00000142875	PRKACB	-0.60473	0.0262661		9.04642	8.51788	9.58061	8.81045	10.1264	9.31186	9.90841	9.26794	9.61527	9.30681	9.4369	8.85674		PRKACB
HMGCR	ENSG00000113161	HMGCR	0.589207	0.0263929		11.359	12.018	10.5956	11.4801	11.1846	11.6806	10.9068	11.2861	10.7214	11.3398	10.8448	11.3385		#N/A
GRK3	ENSG00000100077	GRK3	-0.461966	0.0264637		9.35219	8.85179	9.07692	8.55389	9.50185	9.04509	9.49214	9.28437	9.45139	8.84663	9.31902	8.81219		#N/A
DYRK1A	ENSG00000157540	DYRK1A	0.405704	0.0265057		9.79849	10.0846	10.4122	10.702	10.0818	10.5304	10.2432	10.7316	10.1988	10.6129	10.0487	10.5374		#N/A
NDEL1	ENSG00000166579	NDEL1	0.639687	0.0265057		10.225	10.5614	9.54979	10.4928	9.55002	10.3575	9.10658	9.77618	9.70564	10.0862	9.44196	10.1361		#N/A
RNF115	ENSG00000265491	RNF115	0.261766	0.0265057		9.30024	9.44761	9.33902	9.40253	9.27494	9.47218	9.14001	9.48071	9.17292	9.65039	9.11241	9.45214		#N/A
PFKFB4	ENSG00000114268	PFKFB4	-0.546723	0.0265117		8.11857	7.46433	7.60305	7.30294	7.65075	7.59086	7.59385	7.10083	7.92424	7.08449	7.78601	6.84431		#N/A
INAFM1	ENSG00000257704	INAFM1	0.549702	0.0266266		6.12684	6.53466	5.93373	6.22609	5.76585	6.16809	5.62118	6.45685	5.90349	6.29477	5.55512	6.30726		#N/A
NAP1L6P	ENSG00000204118	NAP1L6P	-1.57719	0.0268519		3.9596	3.66427	5.6073	3.87449	4.83894	3.43174	3.82288	3.21651	4.34539	2.41427	4.27957	3.40316		#N/A
NDC80	ENSG00000080986	NDC80	-0.566661	0.0277235		8.51479	8.23817	9.09712	8.27393	9.17314	8.46927	9.44898	8.96832	8.96784	8.46729	9.23407	8.64951		#N/A
ITPKB	ENSG00000143772	ITPKB	-0.752265	0.0277235		8.35592	7.81257	8.11011	7.12538	8.36596	7.28647	8.71497	8.18404	8.57463	8.01935	8.17031	7.14183		#N/A
RNF169	ENSG00000166439	RNF169	-0.302957	0.0277328		8.09437	8.10809	8.27439	8.01392	8.29773	7.98814	8.43622	7.97221	8.27581	8.00448	8.34253	7.86624		#N/A
CWC27	ENSG00000153015	CWC27	-0.323615	0.0277436		9.45556	9.24243	9.58955	9.07786	9.66907	9.1694	9.64463	9.32067	9.14253	9.11936	9.34806	8.98805		#N/A
PPRC1	ENSG00000148840	PPRC1	0.495943	0.0280647		10.2553	10.628	10.0994	10.8367	10.1769	10.768	10.295	10.8801	10.0145	10.3068	10.6348	11.0094		#N/A
ENSG00000259937	ENSG00000259937	ENSG00000259937	0.988145	0.0280685		3.84823	4.59986	5.06675	5.56771	5.00615	5.02333	4.65683	6.2715	3.92331	4.49998	3.69244	4.92204		#N/A
PRKAG2	ENSG00000106617	PRKAG2	0.615927	0.0280761		9.38748	9.44561	9.0172	9.58678	9.14951	9.93341	8.60984	9.23451	9.37315	9.89177	8.6026	9.78439		PRKAG2
KLHL18	ENSG00000114648	KLHL18	0.53856	0.0280877		8.78808	9.325	8.26994	9.01551	8.31907	8.80337	8.2344	8.72524	8.28777	8.71121	8.14572	8.60493		#N/A
GPCPD1	ENSG00000125772	GPCPD1	0.577014	0.0281044		8.38114	8.41974	8.67471	9.29114	8.44088	8.9333	8.85094	9.35995	8.50468	9.08795	8.46356	9.46563		#N/A
RASGEF1B	ENSG00000138670	RASGEF1B	1.16301	0.028738		5.03981	4.99833	3.41478	5.07531	4.64976	5.13906	4.65683	5.69092	4.89632	5.83845	4.08631	6.20068		#N/A
ZYX	ENSG00000285443	ZYX	0.924786	0.0288959		12.0659	12.3138	10.6159	11.9161	10.3873	11.7887	10.2432	11.2836	11.0906	11.5944	10.3154	11.736		#N/A
ENSG00000274712	ENSG00000274712	ENSG00000274712	-0.837378	0.0292232		5.71546	5.08285	6.29029	4.86509	5.66944	4.34327	5.82281	5.61502	5.96432	5.41226	6.1735	5.47297		#N/A
ENSG00000232533	ENSG00000232533	ENSG00000232533	0.879419	0.0293829		6.7552	7.02587	5.45906	6.7701	5.29171	6.52796	5.56604	6.60808	6.25146	6.41212	5.34071	6.57241		#N/A
LRP5	ENSG00000162337	LRP5	-0.309519	0.0294307		10.414	10.1849	10.3692	10.0715	10.6624	10.3708	10.3673	9.95615	10.4719	10.1193	10.3993	10.124		#N/A
ING2	ENSG00000168556	ING2	0.504716	0.0294307		7.86327	8.07751	7.71188	8.67716	7.92578	8.0111	7.97342	8.42165	7.17927	8.00448	7.62332	8.04629		#N/A
LRRC27	ENSG00000148814	LRRC27	-0.641522	0.0294307		6.65948	6.28996	7.25294	6.61052	6.97643	6.32297	7.66774	6.99501	7.09109	6.24503	7.24527	6.7212		#N/A
B3GALT2	ENSG00000162630	B3GALT2	2.44448	0.0296287		2.3662	2.56766	2.56175	4.32195	3.11927	4.136	2.2995	3.46734	3.74986	4.93594	2.49142	5.5902		#N/A
NXF1	ENSG00000162231	NXF1	0.329032	0.0300576		10.277	10.811	10.3452	10.4775	10.0196	10.6103	10.2596	10.5302	10.1063	10.419	10.3731	10.5014		#N/A
GTF2I	ENSG00000263001	GTF2I	-0.233801	0.0300793		9.4508	9.39692	9.83037	9.61088	9.75575	9.38695	9.84612	9.60035	9.62	9.38066	9.6384	9.3664		#N/A
KCNK5	ENSG00000164626	KCNK5	-1.44046	0.0301558		6.69209	5.41175	8.95213	5.70047	8.16848	7.0258	8.45152	7.50298	7.83475	6.88781	8.87866	7.59884		#N/A
PTPN4	ENSG00000088179	PTPN4	-0.513501	0.0305016		8.47317	8.04628	8.81551	7.84731	8.7779	8.27421	9.03732	8.53583	8.87318	8.58693	8.73491	8.30397		#N/A
TRMO	ENSG00000136932	TRMO	0.617344	0.0306235		6.52108	7.14859	6.77721	7.27482	6.50391	6.83304	6.54717	6.95452	7.14464	7.69744	6.41219	7.60582		#N/A
CLDN7	ENSG00000288292	CLDN7	0.479898	0.0306527		10.3719	10.5522	10.4983	11.1037	10.3188	10.8835	9.90146	10.4294	10.404	10.7838	10.1715	10.7672		CLDN7
GGNBP2	ENSG00000275099	GGNBP2	0.300961	0.0306527		10.2943	10.4955	10.0049	10.5223	9.99663	10.3011	10.0139	10.2487	10.1107	10.385	9.96797	10.2203		#N/A
CEP55	ENSG00000138180	CEP55	-0.474037	0.0306527		9.16735	8.93373	9.14885	8.55681	9.34424	8.76785	9.16573	8.52204	8.99239	8.66939	8.7294	8.2246		#N/A
UBE2B	ENSG00000119048	UBE2B	0.475587	0.0306679		9.05898	9.31848	8.77218	9.43624	8.6019	9.01131	8.57884	8.94784	8.69619	9.17687	8.35689	9.01713		#N/A
MTERF2	ENSG00000120832	MTERF2	-0.686053	0.0307835		6.67588	6.19821	7.3655	6.67649	7.68403	6.79825	7.73177	7.18199	7.48631	6.85502	7.63515	6.93576		#N/A
TUT4	ENSG00000134744	TUT4	-0.248663	0.0308274		10.9865	10.7565	11.2518	11.0861	11.1759	10.7781	11.3651	11.1341	10.9839	10.7541	10.9964	10.7381		#N/A
CAMSAP2	ENSG00000118200	CAMSAP2	0.370058	0.0308274		10.6932	10.9313	10.7583	11.3147	10.6286	10.8679	10.4563	10.7924	10.52	10.9521	10.431	10.8071		#N/A
CBR3-AS1	ENSG00000236830	CBR3-AS1	1.57365	0.0308274		5.47423	6.21703	4.19232	5.87917	3.11927	5.02333	2.54738	4.65428	5.0161	5.99713	4.27957	5.05034		#N/A
KCTD2	ENSG00000180901	KCTD2	0.374521	0.0309338		9.20174	9.52517	9.01188	9.88877	9.12549	9.67276	9.45658	9.59048	9.16646	9.33681	9.10605	9.29265		#N/A
KLHL42	ENSG00000087448	KLHL42	0.392607	0.0310064		9.58929	10.0859	9.43739	9.92201	9.49248	9.80568	9.24248	9.67857	9.25435	9.65992	9.38004	9.54219		#N/A
AATK	ENSG00000181409	AATK	0.85978	0.0310674		5.68337	5.41175	5.32841	6.7701	5.45485	6.5903	6.11942	7.04407	5.60546	6.11259	5.67457	6.61454		#N/A
RALGAPA2	ENSG00000188559	RALGAPA2	-0.344191	0.0312991		9.04009	8.7553	9.48992	8.89138	9.46642	8.98061	9.60927	9.34437	9.20898	8.97042	9.10605	8.89996		#N/A
ZNF385A	ENSG00000161642	ZNF385A	-0.508683	0.0314986		10.3706	9.95189	10.7904	10.1711	10.4587	9.71999	10.0495	9.56044	10.5892	10.0486	10.263	10.0644		#N/A
RRP1	ENSG00000160214	RRP1	0.45135	0.0314986		8.68246	9.07455	8.75639	9.21735	8.68233	9.32719	8.81296	9.10639	8.6163	8.79571	8.94669	9.56922		#N/A
UBE2T	ENSG00000077152	UBE2T	-0.462862	0.031513		8.02564	7.76859	8.23845	7.78388	8.53963	8.12076	8.37337	8.21436	8.18927	7.2947	8.41293	7.80085		#N/A
RMC1	ENSG00000141452	RMC1	0.477966	0.031513		8.20021	8.4238	7.65167	8.38332	7.63381	8.09232	7.50136	8.103	7.59291	8.15348	7.73746	7.98339		#N/A
KLK13	ENSG00000167759	KLK13	1.58462	0.031513		4.5637	4.54132	3.75714	5.49645	2.66556	4.02002	3.82288	5.16076	2.89481	4.93594	3.39138	4.67905		#N/A
B3GNT2	ENSG00000170340	B3GNT2	0.578904	0.0315813		9.47678	9.84402	9.9039	10.5701	9.40038	10.0872	9.3847	9.94069	9.91789	10.4713	9.92285	10.4948		#N/A
NOP58	ENSG00000055044	NOP58	0.33078	0.0315813		9.71762	10.0057	9.82886	10.2482	9.87222	10.1661	9.82719	10.2329	9.79069	9.94337	10.0185	10.4047		#N/A
OAZ2	ENSG00000180304	OAZ2	-0.299051	0.0315813		10.4042	10.3063	10.5274	10.0938	10.2716	9.96708	10.346	9.9916	10.3134	10.0755	10.2885	9.9095		#N/A
AP5Z1	ENSG00000242802	AP5Z1	0.508818	0.0315813		8.73428	9.34225	8.28323	8.56554	7.75621	8.65572	7.85765	8.48343	8.51149	8.85079	8.3711	8.61879		#N/A
DEXI	ENSG00000182108	DEXI	0.86829	0.0315813		6.00231	7.27073	6.37548	6.93189	5.24787	6.74444	5.449	6.09649	6.34594	6.76964	5.78487	6.4224		#N/A
LONP2	ENSG00000102910	LONP2	-0.25675	0.0324794		10.2607	10.0002	10.1365	9.95893	10.3424	9.93541	10.0583	9.97018	10.071	9.78485	10.1314	9.81632		#N/A
ENSG00000259802	ENSG00000259802	ENSG00000259802	-1.11403	0.0324794		4.49141	4.12923	4.6948	3.63007	4.26609	3.23767	4.89918	4.03173	4.57079	3.41312	4.27957	3.40316		#N/A
GJD2	ENSG00000159248	GJD2	-0.933729	0.0324998		6.55695	6.73077	6.44018	4.97403	6.74373	5.39331	6.7213	5.32858	6.42021	6.14007	6.66389	5.34538		#N/A
BCL7A	ENSG00000282873	BCL7A	-0.785008	0.0325022		8.09437	7.5706	9.08199	8.04754	9.41779	8.32397	9.61608	9.05226	8.80552	8.03407	9.16639	8.42332		#N/A
VPS18	ENSG00000104142	VPS18	0.691659	0.0328471		9.89971	10.0936	9.10463	9.8296	8.64479	9.7476	8.73698	9.46638	8.9504	9.70201	8.71554	9.58872		#N/A
SH3RF1	ENSG00000154447	SH3RF1	0.459954	0.0328471		9.78343	10.1884	9.19646	9.77042	9.41779	9.87618	9.31325	9.66452	9.46899	9.87142	9.06291	9.65076		#N/A
DGKD	ENSG00000280873	DGKD	0.344136	0.0328471		9.49075	9.72907	9.18234	9.77544	9.15546	9.67755	9.10175	9.39063	9.33527	9.48345	9.54274	9.77048		#N/A
PNMA8A	ENSG00000182013	PNMA8A	-0.718021	0.0328471		8.60749	8.1818	8.58097	7.64251	9.2557	8.52352	9.50685	8.81279	8.50809	7.6312	8.70435	7.97802		#N/A
MINDY2	ENSG00000128923	MINDY2	0.607149	0.0330115		9.56307	10.0191	9.91105	11.1753	9.86498	10.1931	9.9304	10.1468	9.91532	10.4509	9.82683	10.3936		#N/A
TMX2	ENSG00000213593	TMX2	0.268326	0.0330115		9.38499	9.54951	9.32623	9.60383	9.09179	9.45832	9.20687	9.67234	9.2785	9.42601	9.28376	9.45408		#N/A
EIF5	ENSG00000100664	EIF5	0.255385	0.0330554		12.0177	12.1721	11.8418	12.3263	11.8712	12.1233	12.1019	12.2098	11.8314	12.2096	11.861	12.0208		#N/A
MAGT1	ENSG00000102158	MAGT1	0.294343	0.0332104		10.0598	10.1387	9.96702	10.4813	9.92711	10.3424	10.0407	10.2529	9.99645	10.0522	9.6946	10.1846		#N/A
ZNF281	ENSG00000162702	ZNF281	0.32067	0.0332104		9.5806	9.85908	9.50889	9.99384	9.59227	9.77693	9.74889	10.1389	9.33335	9.60428	9.36769	9.64569		#N/A
PHF14	ENSG00000106443	PHF14	-0.338728	0.0332104		9.9762	9.6875	10.0471	9.58248	9.99498	9.60392	10.2087	10.0016	9.88811	9.65516	9.86249	9.3746		#N/A
PTCD2	ENSG00000049883	PTCD2	-0.494477	0.0332104		7.56171	7.44051	8.28764	7.59781	8.12673	7.42973	8.10013	7.5782	7.94953	7.57191	8.30599	7.86624		#N/A
EIF4G2	ENSG00000110321	EIF4G2	0.253657	0.0332922		14.3043	14.5219	14.124	14.5011	14.2006	14.3975	14.1846	14.4491	14.0669	14.2885	14.0058	14.2507		#N/A
C5orf49	ENSG00000215217	C5ORF49	1.65691	0.0333553		3.2897	4.95414	3.75714	5.31507	3.30185	4.96178	3.72559	3.68095	4.0028	4.80473	2.26653	4.10084		#N/A
ENSG00000254837	ENSG00000254837	ENSG00000254837	-0.898147	0.0335155		5.77758	5.27473	6.60447	5.39561	5.82671	4.52446	5.56604	5.47889	6.04164	5.58216	6.15718	4.67905		#N/A
MAGI3	ENSG00000081026	MAGI3	-0.402948	0.0340132		8.28819	7.87316	8.43382	8.05169	8.64901	8.14172	8.57535	8.32966	8.64755	7.82142	8.08664	8.10164		#N/A
THBS1	ENSG00000137801	THBS1	1.51712	0.0340459		11.9091	12.8184	9.50323	11.4308	9.44231	11.3605	8.07566	10.1812	10.6155	11.527	8.86617	11.0974		#N/A
MAP3K10	ENSG00000130758	MAP3K10	-0.384741	0.0347444		8.11256	7.81874	7.91334	7.42309	8.24852	7.91695	7.97871	7.54449	8.23113	7.76076	7.984	7.74506		#N/A
GLYATL1	ENSG00000166840	GLYATL1	-1.28327	0.0347444		5.54736	4.12923	5.39521	4.37589	5.15599	3.60277	5.97873	5.01086	4.57079	3.73482	6.07272	4.96609		#N/A
CAND2	ENSG00000144712	CAND2	-0.716524	0.0347565		7.02219	6.25395	7.32324	6.71885	8.00033	7.56004	7.94669	6.83693	7.30219	6.3894	7.51865	7.05272		#N/A
MEF2C	ENSG00000081189	MEF2C	1.12161	0.0347618		8.91786	9.45555	7.14061	8.86804	7.26737	8.29931	6.89915	7.82837	7.20471	8.93164	7.12459	8.07171		#N/A
SMAD2	ENSG00000175387	SMAD2	0.389845	0.0351935		10.4262	10.5297	10.3536	10.9665	10.3733	10.8605	10.1013	10.3806	10.3911	10.8549	10.4191	10.7389		#N/A
PCSK7	ENSG00000160613	PCSK7	0.345046	0.0351935		9.10815	9.39486	8.84269	9.12587	8.72692	9.1728	8.60643	9.03537	8.81381	9.04135	8.70996	9.0911		#N/A
DGCR8	ENSG00000128191	DGCR8	0.372969	0.0355378		8.80682	9.1524	9.51829	9.95228	9.452	10.1729	9.73802	10.0731	9.20478	9.20641	9.10179	9.49975		#N/A
ZNF275	ENSG00000063587	ZNF275	0.24317	0.0355378		8.56849	8.80591	8.42586	8.88209	8.53508	8.75883	8.67644	8.7813	8.65064	8.80432	8.58441	8.85674		#N/A
N4BP1	ENSG00000102921	N4BP1	0.279571	0.0355881		9.91879	10.0614	9.81062	10.3695	9.78096	10.0636	9.90424	10.0189	9.87892	10.1382	9.7212	10.0102		#N/A
SMARCAL1	ENSG00000138375	SMARCAL1	-0.446949	0.0358397		8.72643	8.4598	8.67807	8.11253	8.61921	8.10661	8.65017	8.11682	8.34226	8.0915	8.31705	7.73873		#N/A
ENSG00000268670	ENSG00000268670	ENSG00000268670	1.36068	0.0358397		3.10823	4.59986	3.53815	4.08344	3.86308	3.75566	3.38682	4.79852	3.05256	3.9977	2.8573	3.93344		#N/A
SERPINB9	ENSG00000170542	SERPINB9	1.38979	0.0358527		11.0013	10.9926	8.69474	10.2608	8.67407	11.0673	8.5927	11.1836	9.04027	9.58692	8.71554	10.5726		#N/A
MAK16	ENSG00000198042	MAK16	0.622528	0.0358955		9.06522	9.34225	8.29203	9.05944	8.24295	9.03017	8.23881	8.76968	7.88282	8.77832	8.34972	8.95291		#N/A
KCTD11	ENSG00000288399	KCTD11	0.666025	0.0359257		8.01279	8.00896	7.26192	8.12833	7.23406	8.16239	6.70863	7.95692	7.58	7.90388	7.02021	7.78249		#N/A
FOSB	ENSG00000125740	FOSB	-1.67288	0.0359476		10.7639	10.1729	12.0605	9.64423	12.6197	9.89893	10.6301	9.0948	12.1102	11.2823	10.2697	7.7639		#N/A
ZNF592	ENSG00000166716	ZNF592	0.257117	0.0359476		9.55645	9.80101	9.70267	9.89802	9.73009	10.1437	9.76428	10.1081	9.58168	9.79785	9.79291	9.91934		#N/A
KLC1	ENSG00000126214	KLC1	0.490232	0.035986		8.9213	9.54765	8.86643	9.56952	8.33487	9.13496	8.73073	8.82407	9.00209	9.13651	8.89843	9.38478		#N/A
INVS	ENSG00000119509	INVS	-0.34861	0.0362185		8.31984	8.20555	8.44963	8.23068	8.77018	8.13477	8.39331	8.07494	8.70513	8.2762	8.47018	8.16915		#N/A
GOLGA6L9	ENSG00000274320	GOLGA6L9	-0.758591	0.03635		7.81965	7.30632	8.78158	7.89427	8.86391	7.85059	8.59958	7.92584	9.10699	8.4727	8.7211	8.02563		#N/A
FAM72C	ENSG00000263513	FAM72C	-1.3989	0.03635		4.33496	3.42622	4.03364	3.22241	3.86308	3.23767	4.65683	3.46734	3.74986	3.58292	5.31153	3.52595		#N/A
LINC01197	ENSG00000248441	LINC01197	-1.5829	0.0364031		4.06298	3.42622	4.79715	3.09955	5.6014	4.136	5.14475	3.86697	5.32529	3.22064	5.88734	5.00883		#N/A
SESN1	ENSG00000080546	SESN1	-0.569753	0.0364725		8.90052	8.61688	9.76872	8.76063	9.34684	8.44136	8.96457	8.62561	9.29636	9.1331	9.39229	8.79398		#N/A
SDHAF4	ENSG00000154079	SDHAF4	-0.567166	0.0365631		6.9963	6.14022	6.76463	6.64388	7.47176	6.61049	7.28792	6.67191	6.90706	6.73402	7.34947	6.74668		#N/A
CBARP	ENSG00000099625	CBARP	0.834906	0.0366669		7.50776	7.61386	5.99961	7.55169	6.2161	7.24831	6.79509	7.49595	6.33062	7.16695	6.23698	7.27035		#N/A
SLC25A44	ENSG00000160785	SLC25A44	0.331018	0.0367536		9.18465	9.29873	8.98774	9.14153	8.99234	9.34538	8.87382	9.38873	8.8599	9.22578	8.67314	9.16854		#N/A
KCNV1	ENSG00000164794	KCNV1	1.64036	0.0368083		4.76109	6.69093	5.97798	8.28455	5.76585	7.89242	4.98577	6.15126	6.63502	8.04138	7.78601	8.59093		#N/A
LINC00472	ENSG00000233237	LINC00472	1.08156	0.0369194		7.20282	8.09797	7.95268	9.13568	8.37618	9.43019	8.09039	9.65033	8.73744	9.49148	9.04528	10.0076		#N/A
CCDC24	ENSG00000159214	CCDC24	-0.543221	0.0370987		7.48932	6.98252	7.22567	6.95865	6.9898	6.7626	7.65458	6.88081	7.40086	6.91987	7.21406	6.30726		#N/A
CNNM2	ENSG00000148842	CNNM2	-0.758964	0.0374679		7.32225	6.93783	9.11457	8.03921	8.37618	7.48546	8.39726	8.11682	8.03237	7.24495	8.50283	7.64021		#N/A
KCNC4	ENSG00000116396	KCNC4	-0.619014	0.0374679		7.88459	7.68993	6.45591	5.78263	6.92168	5.72504	6.02035	5.66606	8.23113	7.49951	7.63515	7.27911		#N/A
NOL9	ENSG00000162408	NOL9	0.348521	0.037528		8.11256	8.51027	8.40169	8.61404	8.26511	8.9373	8.49276	8.86834	8.37251	8.65993	8.52525	8.68947		#N/A
ATP1B1	ENSG00000143153	ATP1B1	0.730827	0.0376833		10.52	10.7232	9.75766	10.8528	10.2551	11.2474	9.54121	10.2062	10.1625	10.6741	9.48672	10.4711		#N/A
PPP1R10	ENSG00000230995	PPP1R10	0.403886	0.0376833		10.1433	10.8597	10.4162	10.4944	10.4897	11.0655	10.5797	10.6283	10.1538	10.5296	10.006	10.5546		#N/A
CBLL1	ENSG00000105879	CBLL1	0.253062	0.037726		9.30816	9.39486	9.13426	9.48461	9.15249	9.53428	9.28578	9.54177	9.01653	9.29158	9.11874	9.28397		#N/A
TDG	ENSG00000139372	TDG	0.25345	0.0383597		9.73729	9.88432	10.1559	10.1891	10.0245	10.2634	9.95744	10.3438	9.8617	10.1159	9.72535	10.1765		#N/A
COPS3	ENSG00000141030	COPS3	0.252136	0.0383597		9.8572	9.97143	9.78282	10.0581	9.78096	10.0526	9.78556	10.1445	9.62315	9.76514	9.52377	9.86367		#N/A
ATF5	ENSG00000169136	ATF5	0.472517	0.0383597		7.87752	8.31006	7.92469	8.25607	7.48125	8.20285	7.75044	8.38784	8.16355	8.46186	7.53768	7.97263		#N/A
PTK2B	ENSG00000120899	PTK2B	1.27985	0.0384297		11.0326	11.4059	9.26057	11.1928	9.13454	10.8542	8.27365	9.94844	9.73212	10.3279	8.51888	10.6077		#N/A
FOSL2	ENSG00000075426	FOSL2	1.3875	0.0384297		10.4598	10.8394	8.01773	10.4209	8.35567	10.2213	7.13529	9.28233	9.3391	10.1297	8.06494	9.30127		#N/A
EFS	ENSG00000100842	EFS	-0.815436	0.0384297		8.57287	7.84923	9.73204	8.39643	9.8848	9.13844	10.0216	9.30263	9.44784	8.49947	9.69601	9.12549		#N/A
MAP3K2	ENSG00000169967	MAP3K2	0.391329	0.0384297		9.23256	9.47132	8.88107	9.56372	9.55228	9.81005	9.39858	9.7935	9.06131	9.54642	9.27622	9.62352		#N/A
RBM43	ENSG00000184898	RBM43	-0.889569	0.0384297		6.00231	5.20101	7.22567	6.29771	6.71182	5.02333	6.95387	6.58174	6.65975	5.66014	6.74254	6.0451		#N/A
HSD17B1P1	ENSG00000108785	HSD17B1P1	-1.31621	0.0384297		4.98821	3.86855	3.75714	3.33562	4.58076	3.75566	5.25346	4.54944	5.05391	3.41312	5.18848	3.63911		#N/A
ENSG00000260000	ENSG00000260000	ENSG00000260000	-1.12961	0.0384297		5.35706	4.04746	4.40176	4.08344	5.05785	3.75566	4.48911	3.9517	5.32529	4.87182	5.12278	3.12092		#N/A
TTC30B	ENSG00000196659	TTC30B	-0.706967	0.0387423		6.80078	5.73271	7.40656	6.61052	7.50006	6.46282	7.68078	6.97491	7.04489	7.01198	7.38493	6.69526		#N/A
TXNDC11	ENSG00000153066	TXNDC11	0.481845	0.0398552		8.61601	8.97302	8.10013	8.78824	8.03298	8.64597	8.05579	8.51858	8.11965	8.51004	8.02953	8.34625		#N/A
TMEM40	ENSG00000088726	TMEM40	1.31686	0.0399631		7.2474	7.81874	8.01773	9.54029	6.38752	8.65572	5.77498	7.45299	7.25427	7.77835	7.25297	8.5661		#N/A
SRRT	ENSG00000087087	SRRT	0.318429	0.0401027		11.2302	11.5814	11.5029	11.7651	11.5277	11.9578	11.5647	11.9563	11.4372	11.6402	11.6618	11.933		#N/A
SPRED1	ENSG00000166068	SPRED1	0.557115	0.0401027		9.15278	9.64121	8.62687	9.41708	9.32327	9.78362	9.35044	10.1569	8.86257	9.22257	9.09966	9.51094		#N/A
INHA	ENSG00000123999	INHA	1.00156	0.0402068		5.35706	5.88171	4.74688	6.07123	4.26609	4.96178	4.36538	4.60281	5.35588	6.34286	4.64978	5.87069		#N/A
LIF	ENSG00000128342	LIF	1.63217	0.0403138		9.89096	10.5697	7.13084	9.25382	7.23406	9.77246	6.10015	8.55627	8.31527	9.02302	6.59288	8.71873		#N/A
WWC1	ENSG00000113645	WWC1	0.518681	0.0403666		10.1225	10.2296	10.0549	10.7595	9.87402	10.7189	9.55721	10.0384	10.2167	10.4134	9.81648	10.5338		#N/A
SUPT6H	ENSG00000109111	SUPT6H	0.32271	0.0406283		11.4882	11.8183	11.3733	11.7029	11.1411	11.4908	11.3273	11.5385	11.1354	11.453	11.1685	11.5644		#N/A
CSTF3	ENSG00000176102	CSTF3	-0.238472	0.0406283		9.35983	9.0874	9.44923	9.13372	9.34943	9.02266	9.41427	9.25341	9.20898	8.9277	9.18461	9.0911		#N/A
RELL1	ENSG00000181826	RELL1	0.667831	0.0406362		7.03496	7.20625	7.02935	7.74854	6.87921	7.39522	6.36533	6.81448	6.7887	7.40073	6.43943	7.77012		#N/A
DYNC1LI2	ENSG00000135720	DYNC1LI2	0.247323	0.0407038		11.5923	11.6873	11.2653	11.5965	11.1246	11.4867	11.2069	11.4907	11.3382	11.5367	11.3113	11.5323		#N/A
AGPS	ENSG00000018510	AGPS	-0.329748	0.0407038		10.6378	10.4741	10.5804	10.1587	10.545	9.95923	10.4091	10.1591	10.5376	10.2653	10.3355	10.0285		#N/A
UFL1	ENSG00000014123	UFL1	0.464261	0.0407038		9.61291	9.81806	9.5842	10.2988	9.40538	9.71999	9.46602	9.69248	9.56049	9.93162	8.98878	9.91934		#N/A
MAPK8	ENSG00000107643	MAPK8	0.244646	0.0407038		9.89622	10.1188	9.68108	10.011	9.70801	9.94538	9.80355	10.0695	9.75239	9.95695	9.65883	9.84904		MAPK8
LSG1	ENSG00000041802	LSG1	0.30479	0.0407038		9.37246	9.61307	9.29158	9.60524	9.06677	9.58108	9.19101	9.39631	9.11819	9.30681	9.31535	9.65245		#N/A
TUBG2	ENSG00000037042	TUBG2	-0.371091	0.0407038		8.48252	8.32749	8.3352	8.04754	8.58439	8.20949	8.7118	8.21864	8.58436	8.33088	8.49636	7.8487		#N/A
PNO1	ENSG00000115946	PNO1	0.403245	0.0407038		8.17158	8.32749	7.7822	8.07633	7.78717	8.26149	7.58	8.08904	7.76806	8.00448	7.58113	8.31252		#N/A
METTL1	ENSG00000037897	METTL1	0.560371	0.0407038		7.27995	7.37497	6.80204	7.52806	6.94932	7.57038	6.92129	7.5782	6.85446	7.08449	7.24527	8.04115		#N/A
TMEM223	ENSG00000168569	TMEM223	-0.418144	0.0407038		7.46121	6.81966	7.54539	7.20948	7.4622	6.79825	7.67427	7.2421	7.21309	7.1125	7.54397	7.20752		#N/A
EHHADH	ENSG00000113790	EHHADH	-0.787636	0.041136		7.0093	6.27207	7.27971	6.29771	6.72786	5.5268	6.85383	6.23816	6.29948	5.73413	7.25297	6.70829		#N/A
NGF	ENSG00000134259	NGF	1.33506	0.0412032		5.61697	6.60779	5.48995	7.65892	5.20266	7.67955	4.85386	5.32858	6.34594	6.99703	6.37034	6.35773		#N/A
ENSG00000267260	ENSG00000267260	ENSG00000267260	-1.13766	0.0412096		5.13779	4.54132	4.33527	3.53844	5.41576	3.43174	5.14475	4.49401	5.12669	4.99732	5.69731	3.93344		#N/A
PECR	ENSG00000115425	PECR	-0.46753	0.0412441		6.65948	6.12036	6.56148	6.28367	6.80552	6.3711	6.80703	6.11497	6.58424	6.16703	6.20559	5.93859		#N/A
DNMT3B	ENSG00000088305	DNMT3B	-0.400557	0.0413302		10.033	9.32717	9.94907	9.52695	9.64181	9.23915	9.8519	9.45372	9.87496	9.62144	10.2116	9.95119		#N/A
RSAD1	ENSG00000136444	RSAD1	-0.486801	0.041423		8.13052	7.87908	8.77532	8.1165	8.42621	8.09949	8.76173	8.07021	8.49783	8.00448	8.8383	8.43512		#N/A
EPHA1	ENSG00000284816	EPHA1	0.599263	0.0414894		9.57187	9.83186	9.31765	10.3636	9.1072	9.98652	8.90471	9.26588	9.35054	9.64561	9.13549	9.71832		#N/A
UBXN10	ENSG00000162543	UBXN10	-0.822724	0.0414894		5.61697	4.65611	5.84092	4.37589	5.45485	4.89749	5.62118	5.3906	5.35588	5.31917	5.78487	4.45007		#N/A
FAF2	ENSG00000113194	FAF2	0.352084	0.0416756		10.6688	10.9995	10.3282	10.7118	10.3784	10.7013	10.3834	10.7649	10.2219	10.5981	10.2515	10.56		#N/A
SCRN2	ENSG00000141295	SCRN2	-0.412576	0.0416756		8.57725	8.13308	8.97414	8.5771	8.97564	8.41289	8.92128	8.44376	9.04966	8.79571	8.81249	8.46995		#N/A
TFAP4	ENSG00000090447	TFAP4	-0.849659	0.041755		7.26918	6.91496	8.06978	6.98492	8.30844	7.3479	8.7401	7.82837	7.89849	6.90393	8.53159	7.8487		#N/A
BTG3	ENSG00000281484	BTG3	0.485514	0.041755		9.11117	9.10519	8.21553	8.97239	8.56665	9.18631	8.17575	8.8574	8.98262	9.30074	8.44016	9.0482		#N/A
COX18	ENSG00000163626	COX18	-0.338609	0.041755		7.87041	7.61386	7.99098	7.76379	8.29773	7.89242	8.16651	7.7178	8.17647	7.81291	8.15396	7.895		#N/A
LAYN	ENSG00000204381	LAYN	1.07739	0.041792		8.65376	8.67249	7.25294	8.83953	7.21141	8.35423	6.11942	7.21664	9.00451	9.74514	7.61737	9.35816		#N/A
URB2	ENSG00000135763	URB2	0.452024	0.04214		7.83433	8.23817	7.87874	8.38332	8.17435	8.50207	8.13843	8.57642	7.65574	8.21292	8.2494	8.71228		#N/A
PSMA1	ENSG00000129084	PSMA1	0.333386	0.04214		7.51689	7.71663	7.08099	7.74342	7.21141	7.46342	7.28792	7.4457	7.39351	7.68816	7.33503	7.68702		#N/A
CLN8	ENSG00000278220	CLN8	0.49679	0.0422438		9.77584	10.0404	9.29377	10.1018	9.15249	9.63135	9.11621	9.74981	9.37875	9.67878	9.07381	9.54945		#N/A
INTS8	ENSG00000164941	INTS8	-0.474834	0.0423159		10.496	10.1729	10.0956	9.53586	10.2866	9.63382	9.99576	9.62636	10.0847	9.62144	9.93605	9.42872		#N/A
CCDC8	ENSG00000169515	CCDC8	-0.279137	0.0423929		9.1989	8.9507	9.24254	8.9347	9.35977	9.11036	9.38669	9.13158	9.09797	8.60183	9.13341	8.9827		#N/A
DIDO1	ENSG00000101191	DIDO1	0.307841	0.0424046		10.5692	11.0979	10.7881	11.0815	10.8054	11.2474	10.9268	11.3377	10.7454	10.9118	11.0157	11.0413		#N/A
NTPCR	ENSG00000135778	NTPCR	-0.489772	0.0427751		8.80682	8.62395	9.31334	8.66638	9.34424	8.53413	9.10658	8.74615	9.56541	9.13651	9.48017	9.06095		#N/A
DCLRE1A	ENSG00000198924	DCLRE1A	-0.437337	0.0427751		8.09437	7.87316	8.70465	7.96636	8.3505	8.07062	8.64019	8.23141	8.54174	7.92772	8.6265	8.32948		#N/A
FAM171A2	ENSG00000161682	FAM171A2	-0.51046	0.0427751		7.63065	7.14859	7.63103	6.92286	7.75621	7.67955	8.20762	7.53079	7.63717	7.20647	7.8685	7.25268		#N/A
FANCF	ENSG00000183161	FANCF	-0.380678	0.0427761		7.87041	7.70334	8.28323	8.24886	8.58878	7.87584	8.5927	7.98734	8.15922	7.91187	8.28362	7.82497		#N/A
PXN	ENSG00000089159	PXN	0.626466	0.0429155		11.2378	11.4013	10.6229	11.3764	10.5025	11.3797	9.98134	10.9029	10.809	11.0906	10.1947	11.1389		#N/A
TACC1	ENSG00000147526	TACC1	0.917383	0.0430961		11.3691	11.7589	10.1006	11.4248	9.90611	10.9563	9.15176	10.2518	10.4131	11.2629	9.98656	10.9303		#N/A
SNX8	ENSG00000106266	SNX8	0.464629	0.0430961		8.81425	9.13023	8.58097	9.2118	8.24295	9.0037	8.12895	8.61266	8.76904	8.82139	8.4996	8.99604		#N/A
CORO2A	ENSG00000106789	CORO2A	-0.708192	0.0438263		8.87943	8.55534	9.65064	8.68786	8.73488	8.10661	8.5927	7.84508	9.14909	8.77395	9.59969	8.61879		#N/A
SPDL1	ENSG00000040275	SPDL1	-0.321819	0.0438263		8.98192	8.71283	9.39109	8.83953	9.41284	8.94129	9.40645	9.18287	9.08205	8.80432	9.22039	9.06602		#N/A
POLR3C	ENSG00000186141	POLR3C	0.324117	0.0438929		8.96867	9.24013	8.72751	9.05531	8.43601	9.07446	8.85382	8.97845	8.65372	9.08088	8.77822	8.95291		#N/A
CRK	ENSG00000167193	CRK	0.47613	0.0439005		10.3819	10.71	9.86613	10.5823	9.85953	10.4402	9.85765	10.1768	9.76527	10.0826	9.78098	10.3517		#N/A
TTC9C	ENSG00000162222	TTC9C	-0.289891	0.0439005		7.92632	7.48	7.81307	7.5161	7.71655	7.50716	7.86338	7.58485	7.85631	7.70665	7.79658	7.48235		#N/A
L3MBTL3	ENSG00000198945	L3MBTL3	-0.501275	0.043966		9.09906	8.73911	9.22658	8.56844	9.22494	8.63615	8.72129	8.23564	9.22564	9.00071	8.95143	8.23363		#N/A
CCDC9	ENSG00000105321	CCDC9	0.363297	0.0439905		8.48252	8.70285	8.47687	8.87039	8.16848	8.54467	8.12895	8.56974	8.28777	8.46186	8.33529	8.84794		#N/A
DCP1B	ENSG00000284850	DCP1B	-0.475698	0.0439905		8.75758	8.23817	8.30076	7.67514	8.7546	8.21609	8.78908	8.22291	8.34608	8.04865	8.64709	8.37103		#N/A
PSMC4	ENSG00000281221	PSMC4	0.297689	0.0441494		10.2333	10.3937	9.98204	10.1692	10.0049	10.4146	9.99184	10.408	9.92811	10.0809	9.95505	10.3886		#N/A
EIF1B	ENSG00000114784	EIF1B	0.291738	0.0441494		9.42677	9.61838	9.63518	9.95561	9.87222	10.0433	9.75968	10.1138	9.66346	9.82138	9.4736	10.0116		#N/A
LINC00847	ENSG00000245060	LINC00847	-1.01067	0.0441494		4.69825	4.20661	4.40176	3.22241	4.07861	3.75566	4.75871	3.86697	4.71937	4.21999	4.82525	3.52595		#N/A
LGALS8	ENSG00000116977	LGALS8	0.464429	0.0444699		9.16735	9.32283	9.66425	10.1461	9.239	9.8594	9.24687	9.81487	9.17077	9.41762	9.36591	9.99437		#N/A
PMS1	ENSG00000064933	PMS1	-0.457723	0.0446403		8.60321	8.54793	9.21738	8.66638	9.29393	8.64107	9.24687	8.63525	9.04262	8.69277	9.39925	8.97733		#N/A
BCL11B	ENSG00000127152	BCL11B	-1.48103	0.0446403		4.76109	3.14098	5.39521	3.33562	5.4929	3.43174	6.17576	5.19592	5.38585	4.87182	5.7197	4.32034		#N/A
ZC3H12C	ENSG00000149289	ZC3H12C	0.741122	0.0449677		9.23533	9.87546	8.82463	9.85237	8.76241	9.67755	8.09039	8.5897	9.42638	10.0175	8.81768	9.3664		#N/A
PIM3	ENSG00000198355	PIM3	0.546921	0.0449677		8.39111	8.58825	8.75321	9.61228	8.93129	9.60392	8.4591	9.35023	8.94789	9.29464	8.7915	9.0761		#N/A
LINC01529	ENSG00000225872	LINC01529	-1.22623	0.0452591		4.76109	3.42622	4.03364	3.44059	4.26609	3.23767	4.65683	4.31368	4.76568	3.87224	4.64978	2.95597		#N/A
ARHGEF39	ENSG00000137135	ARHGEF39	-0.821287	0.0452814		6.70813	6.03807	7.63795	6.45633	7.74048	6.70742	7.96279	7.19073	7.50008	6.96666	7.91775	7.24376		#N/A
EHMT2	ENSG00000238134	EHMT2	-0.527254	0.0453018		9.78343	9.49465	10.2592	9.44888	10.443	9.872	10.6115	10.1058	10.1363	9.61656	10.5038	10.0311		#N/A
RBM22	ENSG00000086589	RBM22	0.264736	0.0454109		9.73533	9.99343	9.69606	10.0237	9.57906	10.0359	9.87051	10.1127	9.69072	9.69739	9.69318	9.97294		#N/A
BRD3	ENSG00000169925	BRD3	-0.331872	0.045683		9.9679	9.7026	10.2148	9.92992	10.4979	9.96708	10.5202	10.218	9.98915	9.82773	10.33	9.91654		#N/A
PPT2-EGFL8	ENSG00000258388	PPT2-EGFL8	0.952904	0.0461256		3.2897	4.54132	3.94723	5.44691	4.26609	5.08235	4.29929	5.19592	4.14973	4.58241	4.21798	4.10084		#N/A
ENSG00000239415	ENSG00000239415	ENSG00000239415	-1.08666	0.0463457		4.06298	3.86855	5.10716	3.71623	4.58076	3.89388	5.449	3.86697	5.05391	4.31948	5.01827	4.5691		#N/A
KIAA1109	ENSG00000138688	KIAA1109	-0.290848	0.0464223		11.2135	10.9581	11.1363	10.7294	11.0869	10.7692	11.0761	10.8508	11.2765	11.0276	10.9313	10.637		#N/A
FAM126B	ENSG00000155744	FAM126B	0.415737	0.0464223		8.17158	8.38687	7.45434	8.25607	7.69223	8.24221	7.87477	8.17084	7.64339	8.20643	7.94652	8.02563		#N/A
TRMT2B	ENSG00000188917	TRMT2B	-0.386005	0.0464223		7.78226	7.24345	8.26549	7.49797	7.90476	7.6408	7.7255	7.59805	7.80179	7.45644	7.8175	7.62655		#N/A
ATXN7L1	ENSG00000146776	ATXN7L1	-0.441224	0.0466059		7.68837	7.31508	7.81917	7.10955	7.57294	7.0258	7.77497	7.58485	7.57351	7.12631	7.32776	6.93576		#N/A
AFG1L	ENSG00000135537	AFG1L	-0.536102	0.0466279		6.80078	5.92814	6.68677	6.07123	6.79032	5.8993	6.58926	6.25493	6.15036	6.14007	6.74254	6.39043		#N/A
HSD11B1L	ENSG00000167733	HSD11B1L	-0.529319	0.0467028		6.15051	6.01675	6.342	5.93414	6.34653	6.08394	6.60302	5.93937	6.37611	6.08458	6.8067	5.69861		#N/A
NSD3	ENSG00000147548	NSD3	-0.303009	0.046816		11.4362	11.043	11.3676	11.0962	11.207	10.8742	11.3022	11.088	11.0075	10.7518	11.1997	10.8569		#N/A
APOLD1	ENSG00000178878	APOLD1	-1.07794	0.0468656		4.76109	4.76244	5.6073	4.42788	5.41576	5.39331	6.47417	5.26377	6.44887	4.73436	6.05522	4.92204		#N/A
ENSG00000261732	ENSG00000261732	ENSG00000261732	1.36962	0.0468656		3.2897	4.4803	3.6518	4.57349	3.86308	4.34327	2.94326	3.21651	3.44293	4.49998	3.01047	4.78121		#N/A
HIVEP3	ENSG00000127124	HIVEP3	0.460465	0.0468669		9.38997	9.70093	8.71122	9.22104	8.61058	9.45274	8.63015	8.86834	8.85723	9.16688	8.96555	9.44827		#N/A
OLMALINC	ENSG00000235823	OLMALINC	-0.758816	0.0469606		9.1989	8.53674	9.57522	8.53326	10.492	9.72925	10.1013	9.32861	9.89593	9.24172	9.94796	9.2308		#N/A
NEK2	ENSG00000117650	NEK2	-0.593005	0.0469606		8.25582	8.00896	9.24027	8.57997	9.59446	8.49122	9.46978	9.04986	8.94286	8.50477	9.21054	8.60841		#N/A
ZBTB42	ENSG00000179627	ZBTB42	0.630702	0.0469606		7.63904	8.09797	7.08099	7.73828	6.52242	7.33582	6.50381	6.91286	7.2297	7.67882	6.85808	7.77012		#N/A
DNAJA1	ENSG00000086061	DNAJA1	0.345049	0.0471645		11.9888	12.3334	11.5241	12.1326	11.9352	12.2242	11.9157	12.1463	11.6062	11.9761	11.7657	12.0231		#N/A
ELF1	ENSG00000120690	ELF1	0.706185	0.0474391		10.5189	10.9327	10.6062	11.5356	10.102	10.6895	9.76428	10.2653	10.2848	10.979	9.78895	10.8018		#N/A
AKIRIN1	ENSG00000174574	AKIRIN1	0.324359	0.0474391		10.8993	11.0613	10.6976	11.1392	10.7544	11.0238	10.5814	11.0314	10.5359	10.8118	10.4054	10.7734		#N/A
STEAP2	ENSG00000157214	STEAP2	-1.50341	0.0474391		5.65055	4.04746	4.84573	3.22241	5.4929	3.23767	6.56134	5.32858	5.92405	4.49998	5.60409	5.05034		#N/A
NEIL3	ENSG00000109674	NEIL3	-0.594895	0.0475638		6.91573	6.66375	7.29728	6.68719	7.73255	7.07022	7.93041	6.72102	7.10916	7.19342	7.38493	6.64195		#N/A
FAM189A2	ENSG00000135063	FAM189A2	1.02087	0.0475638		5.80766	5.75864	4.84573	5.5206	4.35142	6.08394	4.70867	5.3906	5.09076	6.66002	4.44998	5.34538		#N/A
HROB	ENSG00000125319	HROB	0.580286	0.0476793		6.87369	7.34961	7.17904	8.17851	7.50938	7.98814	7.23587	8.10762	7.51371	7.33091	7.3779	8.08675		#N/A
B4GAT1	ENSG00000174684	B4GAT1	-0.463124	0.0476946		8.05729	7.60674	7.89037	7.35086	8.13879	7.8249	8.40906	7.93106	7.79064	7.60186	8.00238	7.22575		#N/A
EGR1	ENSG00000120738	EGR1	-1.27067	0.0476993		11.7695	11.219	14.0046	12.3693	14.2382	12.8763	13.9584	12.7847	13.768	13.2651	13.7336	10.7036		#N/A
H3-3B	ENSG00000132475	H3-3B	0.26953	0.0479004		12.5481	12.6902	12.5097	12.816	12.3585	12.6376	12.6956	12.9289	12.361	12.6552	12.2754	12.6538		#N/A
FOXP4	ENSG00000137166	FOXP4	-0.399727	0.0479004		10.677	10.4365	10.6564	10.0131	10.6435	10.1368	10.8026	10.6154	10.5812	10.1702	10.4513	9.94708		#N/A
BTBD6	ENSG00000184887	BTBD6	0.540664	0.0479004		8.43994	8.56272	8.13475	9.08395	7.72457	8.5655	7.79908	8.36098	8.27581	8.59192	8.01149	8.3792		#N/A
ZFYVE27	ENSG00000155256	ZFYVE27	0.376137	0.0480404		8.82164	9.00315	8.35631	8.77826	8.08374	8.94129	8.32437	8.66692	8.63201	8.62632	8.67027	9.08612		#N/A
KANK2	ENSG00000197256	KANK2	-0.325495	0.0481102		9.60436	9.28095	9.17285	8.69848	9.36747	8.99604	9.29641	8.94526	9.26849	9.23854	9.36769	8.97194		#N/A
FYTTD1	ENSG00000122068	FYTTD1	0.359126	0.0484768		10.0409	10.2864	9.83188	10.5787	9.99829	10.2295	9.93857	10.1845	9.71305	10.0304	9.62512	9.95939		#N/A
CDKN3	ENSG00000100526	CDKN3	-0.487293	0.0484768		7.53499	7.35811	7.89037	7.52806	8.58439	7.59086	8.03563	7.36304	7.73353	7.56179	7.74293	7.36387		#N/A
RAB3A	ENSG00000105649	RAB3A	-1.1012	0.0484768		5.18439	5.16269	5.06675	3.44059	5.41576	3.89388	5.7991	4.24819	4.89632	4.80473	5.31153	4.32034		#N/A
ZNF358	ENSG00000198816	ZNF358	-0.360809	0.0489468		8.80309	8.32315	8.84568	8.30555	8.96553	8.9373	8.96723	8.44376	8.82479	8.53613	8.86366	8.5262		#N/A
GPSM2	ENSG00000121957	GPSM2	-0.518181	0.0489468		7.34294	7.01515	8.26102	7.65892	8.20333	7.78991	8.4779	7.68105	7.87227	7.74295	8.12908	7.42037		#N/A
TFPI	ENSG00000003436	TFPI	0.484678	0.0490215		10.4116	10.5878	9.59667	10.7778	10.4943	10.9788	10.3357	10.8222	10.2343	10.5882	10.4496	10.8056		#N/A
STXBP3	ENSG00000116266	STXBP3	0.434016	0.0490443		9.16735	9.58255	8.87523	9.58535	8.83458	9.04137	8.83645	9.0642	8.94034	9.27618	8.59656	9.23306		#N/A
ASB6	ENSG00000148331	ASB6	0.420143	0.0493666		8.25036	8.73585	7.97469	8.54214	7.85449	8.63615	8.06576	8.34541	7.91912	8.1802	8.15396	8.20635		#N/A
SMARCC2	ENSG00000139613	SMARCC2	-0.218946	0.0494114		11.3691	11.1649	11.5995	11.2991	11.5312	11.4381	11.7097	11.5213	11.4967	11.2064	11.5635	11.3291		#N/A
TAF5	ENSG00000148835	TAF5	-0.440083	0.0497596		7.55286	7.28864	7.7314	7.34411	7.85449	6.97997	7.90841	7.67483	7.34094	7.07028	7.80184	7.17035		#N/A
ADGRF1	ENSG00000153292	ADGRF1	1.04308	0.0497711		5.58259	6.50433	5.18475	6.95865	5.52998	6.54904	5.50871	5.29654	4.67153	5.1672	5.22024	6.3411		#N/A
ZBTB1	ENSG00000126804	ZBTB1	0.320811	0.049778		10.0089	10.4254	9.67437	10.1616	9.64181	9.89688	9.52323	9.96764	10.2466	10.4509	9.97497	10.0619		#N/A
CDC27	ENSG00000004897	CDC27	-0.204459	0.049778		10.4514	10.2841	10.4588	10.2134	10.6329	10.3288	10.5797	10.3161	10.3735	10.3412	10.3748	10.1682		#N/A
RXRB	ENSG00000231321	RXRB	-0.328344	0.049778		9.1989	9.28542	9.41543	8.95034	9.40787	8.79457	9.43365	9.20029	9.32757	8.95116	9.49971	9.10101		#N/A
ZNF862	ENSG00000106479	ZNF862	-0.424414	0.049778		7.60518	7.59239	8.38946	7.60912	8.23736	7.85059	8.06576	7.71174	8.30355	7.65044	7.91775	7.71955		#N/A
CDK6	ENSG00000105810	CDK6	0.575629	0.0501596		11.544	11.8827	10.8806	11.8444	11.2318	12.1662	10.8115	11.0277	11.2137	11.8497	11.4584	11.6403		#N/A
KIF20B	ENSG00000138182	KIF20B	-0.423517	0.0501596		9.59145	9.14505	9.98068	9.38455	9.99	9.50221	10.3295	9.85941	9.89724	9.60428	9.89237	9.62008		#N/A
SLC41A1	ENSG00000133065	SLC41A1	-0.467658	0.0501596		9.14101	8.84878	9.06414	8.14007	9.37003	8.88023	9.24687	8.88459	9.01892	8.5153	9.2553	8.92249		#N/A
USP30	ENSG00000135093	USP30	-0.369757	0.0501596		7.84887	7.54103	8.44569	7.87567	8.30309	8.09949	8.52925	8.31374	8.20195	7.85497	8.11225	7.57771		#N/A
MXI1	ENSG00000119950	MXI1	-0.450411	0.0501596		8.57287	8.23355	8.00174	7.45477	7.87625	7.19582	8.10498	7.78284	8.19351	7.83829	8.22613	7.70663		#N/A
ENSG00000279989	ENSG00000279989	ENSG00000279989	-0.745147	0.0501596		5.35706	4.81281	5.3622	4.61893	5.73442	4.52446	5.38672	4.92963	4.89632	4.80473	5.78487	4.96609		#N/A
DAPK3	ENSG00000167657	DAPK3	0.686326	0.0501983		10.2635	10.4613	9.35798	10.151	9.35461	10.1729	8.7709	9.85254	9.58491	9.84035	8.96086	10.1881		#N/A
ESRP2	ENSG00000103067	ESRP2	0.678461	0.0502858		9.65281	10.105	10.3239	11.2454	9.66282	10.4289	9.46602	10.0504	9.93572	10.4509	9.89851	10.5708		#N/A
STX16	ENSG00000124222	STX16	-0.233648	0.050821		10.2222	9.94203	10.0981	9.95672	10.1112	9.88657	10.0318	9.65191	10.144	10.0862	10.1837	9.85051		#N/A
TAGAP-AS1	ENSG00000271913	TAGAP-AS1	-0.93189	0.0513676		4.24987	3.96078	4.98236	3.79753	4.58076	3.75566	5.10662	4.03173	4.97726	4.21999	4.82525	4.51081		#N/A
LAMP3	ENSG00000078081	LAMP3	1.2063	0.0513723		7.37342	8.13802	8.76904	10.0623	8.36083	9.53692	7.47914	8.85465	9.32564	10.0267	8.2104	10.0783		#N/A
BNC1	ENSG00000169594	BNC1	0.897085	0.0513762		10.5064	10.6454	9.61079	11.1087	9.22494	10.6788	8.59615	9.75718	10.3911	10.7794	9.61171	10.3192		#N/A
POC1A	ENSG00000164087	POC1A	-0.382416	0.0513762		7.75936	7.71	8.47301	7.80861	8.53052	8.00349	8.1895	7.99235	8.20616	7.81291	8.26471	7.91761		#N/A
APOBEC3F	ENSG00000128394	APOBEC3F	-0.781623	0.0513769		8.03839	7.58517	9.07437	8.0885	9.06045	8.20949	8.34499	7.30786	8.97031	8.25122	9.07598	8.51142		#N/A
ZNF140	ENSG00000196387	ZNF140	0.435999	0.0514296		7.88459	8.06198	7.7822	8.50025	7.49069	8.33615	7.8169	8.43275	7.87227	7.74295	7.84322	8.15969		#N/A
ANKRD26	ENSG00000107890	ANKRD26	-0.362979	0.0514318		8.75372	8.57372	9.15369	8.68519	8.87116	8.40713	9.01947	8.43643	8.59401	8.4007	8.97256	8.70255		#N/A
PLIN2	ENSG00000147872	PLIN2	-0.522978	0.0514992		9.89622	9.49078	9.76399	8.67716	9.74199	9.16258	9.76581	9.40008	9.20898	8.91979	9.76895	9.31198		#N/A
TEAD1	ENSG00000187079	TEAD1	0.422117	0.0515991		11.4156	11.4499	11.4863	12.1927	11.3577	11.8345	11.2203	11.5377	11.5547	11.9699	11.3127	11.7925		#N/A
EBNA1BP2	ENSG00000117395	EBNA1BP2	0.364682	0.0515991		9.88215	10.1362	9.53134	10.0643	9.40038	9.91729	9.42593	9.76744	9.4881	9.65754	9.53644	9.87237		#N/A
PIK3CA	ENSG00000121879	PIK3CA	0.362266	0.0515991		8.9384	9.62192	9.01188	9.41063	8.98234	9.2807	8.84805	9.12476	9.00933	9.32488	8.87368	8.98002		#N/A
ACOT2	ENSG00000119673	ACOT2	-0.684776	0.0515991		6.34766	5.75864	6.39193	5.5206	6.77496	5.99457	6.45911	6.3825	6.3611	5.58216	7.03814	6.18212		#N/A
GPRIN3	ENSG00000185477	GPRIN3	-1.50038	0.0515991		5.866	5.3787	4.19232	2.96525	5.29171	4.136	6.36533	4.24819	4.85407	4.21999	6.01956	4.32034		#N/A
ENSG00000235609	ENSG00000235609	ENSG00000235609	-0.735866	0.0515991		5.31579	4.99833	5.5202	4.61893	5.63582	4.68542	5.95746	5.26377	5.77353	5.11277	5.12278	4.73103		#N/A
CATSPER2P1	ENSG00000205771	CATSPER2P1	-0.981437	0.0515991		4.33496	3.42622	5.25837	4.01709	4.89685	4.136	4.65683	4.49401	4.34539	3.41312	3.78029	3.26893		#N/A
WDR20	ENSG00000140153	WDR20	0.380982	0.0518291		8.91441	9.14012	8.9549	9.53438	8.84565	9.11743	8.51112	9.00348	8.73162	9.08442	8.7294	9.0482		#N/A
FAM107B	ENSG00000065809	FAM107B	0.76442	0.05235		10.1418	10.5146	9.22887	10.7006	9.52728	10.6052	9.45468	9.82192	9.65886	10.3383	8.99109	9.48279		#N/A
XPO1	ENSG00000082898	XPO1	-0.306191	0.0530535		11.7395	11.378	12.0404	11.6966	11.9677	11.6215	12.1047	11.7072	11.9717	11.6492	11.9995	11.9043		#N/A
WDR55	ENSG00000120314	WDR55	0.414183	0.0531081		8.85803	9.34225	8.45355	9.07583	8.37618	8.78127	8.39726	8.69484	8.52164	8.73393	8.50283	8.85382		#N/A
R3HDM1	ENSG00000048991	R3HDM1	-0.344765	0.053156		10.1135	9.80878	10.118	9.66739	10.5049	10.0818	10.3552	10.2159	10.0733	9.67878	10.2155	9.83723		#N/A
ALAD	ENSG00000148218	ALAD	-0.350296	0.0532111		8.95865	8.78714	9.41744	8.9347	9.06045	8.72218	9.01691	8.73424	9.38618	8.95503	9.30428	8.98002		#N/A
CENPN	ENSG00000166451	CENPN	0.450626	0.0533938		6.95658	7.35811	7.39844	7.88964	7.8324	7.9648	7.62116	8.16642	7.07278	7.48886	7.32776	7.96179		#N/A
PPIL4	ENSG00000131013	PPIL4	0.267732	0.0535395		9.5431	9.79632	9.49754	9.84641	9.28582	9.48317	9.53045	9.80778	9.45139	9.71577	9.43521	9.66587		#N/A
MELTF-AS1	ENSG00000228109	MELTF-AS1	-0.670699	0.0535395		5.27331	5.12332	5.32841	4.82688	5.45485	4.68542	5.18191	4.43637	5.75069	4.58241	5.50443	5.16816		#N/A
CXCL8	ENSG00000169429	CXCL8	1.79251	0.0539403		4.06298	4.71026	3.27987	3.71623	3.46391	4.96178	2.2995	3.68095	2.28077	4.21999	2.8573	4.67905		#N/A
MICU3	ENSG00000155970	MICU3	0.559833	0.0540023		7.61372	8.04628	6.93147	7.44218	7.59934	8.24867	7.37872	8.05593	7.40086	7.59195	7.15777	7.93987		#N/A
KIAA0319L	ENSG00000142687	KIAA0319L	-0.173569	0.0546766		10.4609	10.3378	10.3868	10.191	10.3095	10.2855	10.3714	10.115	10.4667	10.3068	10.4521	10.1753		#N/A
NSD1	ENSG00000165671	NSD1	-0.396041	0.0546876		11.1714	10.7166	11.6912	11.0805	11.6327	11.122	11.7329	11.3908	11.4851	11.2274	11.5937	11.3401		#N/A
POLR1F	ENSG00000105849	POLR1F	0.38847	0.0546876		8.85803	8.70285	8.22015	8.91206	8.56665	8.92526	8.59958	9.17628	8.64136	8.9277	8.45691	9.02235		#N/A
PIGA	ENSG00000165195	PIGA	0.371355	0.0546876		7.98014	8.29685	8.34368	8.85386	8.31376	8.3422	8.15721	8.52896	8.00367	8.19338	7.95598	8.63594		#N/A
STN1	ENSG00000107960	STN1	-0.484873	0.0546876		8.62026	8.177	8.17333	7.25337	7.88343	7.44105	7.74425	7.5782	8.1241	7.65044	8.06056	7.64699		#N/A
TIPARP	ENSG00000163659	TIPARP	0.816574	0.0547355		9.8041	10.5632	8.37711	10.0003	9.33902	10.1105	9.08468	9.68167	9.10023	9.48613	8.6116	9.41885		#N/A
ENSG00000279342	ENSG00000279342	ENSG00000279342	0.548783	0.0548117		5.71546	5.90511	5.66259	6.05479	5.96851	6.46282	5.59387	6.59497	5.83997	6.21949	5.84722	6.4224		#N/A
FAM131B	ENSG00000159784	FAM131B	0.832628	0.0549468		7.13326	7.5706	6.65986	8.36677	7.06752	8.22921	8.1337	8.79283	7.75664	7.93559	7.46664	8.50396		#N/A
RPUSD3	ENSG00000156990	RPUSD3	-0.277962	0.0551222		8.76909	8.67589	8.73398	8.25247	8.63632	8.56032	8.80405	8.51858	8.97278	8.4564	8.88115	8.67958		#N/A
BYSL	ENSG00000112578	BYSL	0.357603	0.0551222		8.08211	8.34898	7.78843	8.07633	7.92578	8.38971	8.01004	8.19711	7.66187	8.04138	7.8884	8.40343		#N/A
ALYREF	ENSG00000183684	ALYREF	0.253083	0.0551444		9.20174	9.59519	9.3767	9.58392	9.38275	9.52898	9.27508	9.48249	9.11819	9.35451	9.35344	9.6575		#N/A
ZBTB34	ENSG00000177125	ZBTB34	0.310744	0.0552234		8.58161	9.01126	8.88689	9.43307	9.01867	9.30568	9.16109	9.34632	8.92767	9.30074	8.90333	8.95837		#N/A
HUWE1	ENSG00000086758	HUWE1	-0.154536	0.0554025		13.096	12.9756	13.1606	12.8788	13.0359	12.9065	13.0452	12.8748	13.0182	12.9504	12.9938	12.8389		#N/A
GDPD1	ENSG00000153982	GDPD1	-1.09396	0.0554261		5.71546	4.99833	5.54982	4.20762	6.6288	4.83021	6.4439	6.05878	5.29403	4.87182	6.07272	4.38666		#N/A
GSEC	ENSG00000280832	GSEC	-0.838842	0.0559704		5.54736	4.4803	5.5202	4.74726	5.73442	5.13906	5.91396	5.5888	5.16174	4.31948	6.07272	5.05034		#N/A
MBP	ENSG00000197971	MBP	0.690942	0.0566699		9.80223	9.85308	9.28058	10.5379	9.5065	10.3767	8.7709	9.45554	9.68621	10.0915	9.03639	9.86948		#N/A
EPHA2	ENSG00000142627	EPHA2	0.820182	0.0568046		11.244	11.5292	9.71089	11.2683	10.4587	11.4103	9.72863	10.8355	10.8062	11.2754	9.83069	10.6387		#N/A
B4GALT6	ENSG00000118276	B4GALT6	0.611814	0.0569731		8.46376	8.62747	9.24254	10.0664	9.59008	10.1847	9.18645	9.85116	9.19	9.7892	8.65001	9.34571		#N/A
NFIL3	ENSG00000165030	NFIL3	-0.447013	0.057296		7.96687	8.20555	8.6544	8.01392	8.3505	7.68907	8.37337	7.97727	8.40213	7.91982	8.70435	8.07171		#N/A
ZNF335	ENSG00000198026	ZNF335	0.275354	0.0578473		8.73819	9.14995	8.8397	8.92795	8.73091	9.15228	8.77395	9.06895	8.58112	8.80432	8.8383	9.02235		#N/A
TMEM39A	ENSG00000176142	TMEM39A	0.222649	0.0582122		9.04957	9.32065	9.08958	9.26279	9.12549	9.11036	8.96723	9.39819	9.02845	9.30984	9.06072	9.21947		#N/A
AXL	ENSG00000167601	AXL	0.823207	0.0583495		11.2536	11.4682	10.1044	11.3319	10.2771	11.4374	9.60586	10.6056	10.6305	11.1627	9.69035	10.746		#N/A
TIMM10B	ENSG00000132286	TIMM10B	0.364131	0.0584145		9.34195	9.41129	9.30033	9.73086	9.22494	9.26486	9.14942	9.87712	9.34101	9.55154	9.15205	9.75644		#N/A
MTAP	ENSG00000099810	MTAP	0.43633	0.0584188		10.3115	10.3074	10.1892	11.0729	10.2524	10.5304	10.1653	10.333	10.1711	10.8	10.3409	10.8393		#N/A
VPS37D	ENSG00000176428	VPS37D	-0.748798	0.0584188		6.02809	5.3787	5.63521	5.20016	6.6116	5.68751	6.77091	6.16906	6.11503	5.36647	6.01956	5.27708		#N/A
THAP8	ENSG00000161277	THAP8	-0.528349	0.0587644		6.52108	5.56654	6.54687	5.89773	6.42736	6.32297	6.63016	5.69092	6.15036	6.08458	6.09001	5.82358		#N/A
ENSG00000287625	ENSG00000287625	ENSG00000287625	-1.15226	0.0588596		4.06298	2.78507	4.03364	3.87449	4.26609	4.136	4.89918	3.77696	4.57079	3.22064	4.55334	3.52595		#N/A
IPO8	ENSG00000133704	IPO8	-0.319099	0.058866		9.65695	9.58073	9.96976	9.65108	9.95634	9.51566	10.2443	9.90395	10.0097	9.67173	9.86249	9.48089		#N/A
OCEL1	ENSG00000099330	OCEL1	-0.578295	0.0590159		7.27995	7.0365	6.5321	5.91605	7.15319	5.99457	7.0066	6.39768	7.09109	6.75194	6.88805	6.45367		#N/A
SRPK1	ENSG00000096063	SRPK1	-0.333679	0.0591302		10.6315	10.3474	10.5144	10.1759	10.4897	9.88657	10.3378	9.85254	10.3433	10.0985	10.5498	10.473		#N/A
PDCD6IP-DT	ENSG00000271643	PDCD6IP-DT	0.822202	0.0591302		7.54395	7.83711	6.21832	7.40375	5.85621	6.78054	5.53766	6.28789	6.7198	7.47813	6.35612	7.25268		#N/A
MAP3K1	ENSG00000095015	MAP3K1	0.579797	0.0591952		8.8363	9.32933	8.88398	9.51648	9.39285	10.0152	9.54834	10.2674	9.3237	9.99507	9.50778	9.81933		MAP3K1
MPP6	ENSG00000105926	MPP6	-0.720449	0.0592561		7.58795	7.16807	7.53061	6.00431	8.2706	7.38354	7.81099	7.14648	7.87227	7.48886	7.86348	7.30506		#N/A
NAPSA	ENSG00000131400	NAPSA	-1.12432	0.0592561		4.98821	3.29064	4.33527	3.71623	3.86308	3.01338	3.82288	3.34737	4.67153	3.41312	4.39538	4.10084		#N/A
MAPRE1	ENSG00000101367	MAPRE1	0.29941	0.0594729		11.1605	11.3638	11.1418	11.4478	11.1321	11.3657	11.2932	11.5368	10.7096	11.0853	10.7703	11.227		#N/A
MRTFA	ENSG00000196588	MRTFA	0.409098	0.0598718		10.218	10.2864	9.99152	10.5737	9.92537	10.5157	9.72706	9.93809	9.80045	10.1802	9.88248	10.447		#N/A
DLX3	ENSG00000064195	DLX3	-0.987263	0.0598718		7.81225	7.04706	9.64551	8.82264	9.1072	7.29896	9.85046	9.0109	8.8811	8.1802	9.28938	8.0616		#N/A
CCNC	ENSG00000112237	CCNC	0.301598	0.0600602		9.64242	9.76148	9.42945	9.81625	9.4301	9.65342	9.06989	9.47714	9.46724	9.84035	9.40444	9.70538		#N/A
DNAJC4	ENSG00000110011	DNAJC4	-0.334681	0.0600602		8.00632	7.51084	8.41785	8.12833	8.35567	8.13477	8.46288	8.15306	8.39478	7.92772	8.13326	7.93987		#N/A
RTF1	ENSG00000137815	RTF1	-0.214599	0.0602228		10.7417	10.604	10.9095	10.4905	10.8491	10.6449	10.9725	10.7286	10.5876	10.4646	10.6726	10.5107		#N/A
ACTG2	ENSG00000163017	ACTG2	1.41405	0.0603311		5.54736	6.27207	3.27987	5.07531	2.37082	4.43671	2.94326	4.24819	5.65551	6.29477	4.69569	4.73103		#N/A
PAQR8	ENSG00000170915	PAQR8	-0.520521	0.0606964		7.19146	6.60779	7.61009	7.12538	7.47176	6.9002	7.49399	7.07273	7.83475	7.51007	7.73746	7.04247		#N/A
FGD1	ENSG00000102302	FGD1	-0.486291	0.0607994		8.51479	7.90833	8.84866	8.10855	9.28311	8.92929	9.06244	8.59959	8.67814	8.23219	8.83317	8.45457		#N/A
HOXC6	ENSG00000197757	HOXC6	-1.07715	0.0608359		6.73968	5.23834	6.12299	5.54435	6.80552	5.5268	5.02719	4.31368	6.95781	6.14007	7.54397	6.45367		#N/A
ZSWIM9	ENSG00000185453	ZSWIM9	-0.39223	0.0608359		7.58795	7.1968	7.65849	7.35758	7.74048	7.53912	8.03055	7.48887	7.72769	7.21941	7.97006	7.62655		#N/A
ZNF324	ENSG00000083812	ZNF324	0.449488	0.0608359		7.08495	7.53354	6.98666	7.49797	7.27831	7.7631	7.2181	7.70565	6.82195	6.95123	7.1982	7.6738		#N/A
CIRBP-AS1	ENSG00000267493	CIRBP-AS1	0.991636	0.0608359		4.87912	5.04121	4.46533	5.82203	4.71562	6.50657	5.70013	5.85389	5.2294	6.34286	5.55512	6.4224		#N/A
BIK	ENSG00000100290	BIK	1.22159	0.0608645		5.866	6.54958	4.74688	6.6657	5.6014	6.56982	4.23003	4.54944	5.26208	6.11259	6.0375	7.42037		#N/A
DDX10	ENSG00000178105	DDX10	-0.251166	0.0610519		9.41216	9.10519	9.42546	9.11005	9.41779	9.22285	9.24906	9.18506	9.17292	8.98943	9.4981	9.08362		#N/A
KCTD21-AS1	ENSG00000246174	KCTD21-AS1	-1.25496	0.0610519		4.69825	4.20661	4.79715	3.94755	5.00615	3.23767	5.95746	4.37633	5.29403	5.11277	6.35612	5.09069		#N/A
AKAP17A	ENSG00000197976	AKAP17A	0.262407	0.0611242		10.1389	10.4344	10.1303	10.4752	10.0849	10.4074	9.91532	10.1513	10.0536	10.1735	10.0264	10.2507		#N/A
EPPK1	ENSG00000261150	EPPK1	1.05637	0.0612183		10.2264	10.7517	9.50323	10.9399	8.46501	10.3694	8.5038	9.10639	9.49843	10.0304	8.65582	9.93743		#N/A
GBP1	ENSG00000117228	GBP1	1.65583	0.0613262		5.27331	5.27473	3.53815	6.5176	6.71182	8.31169	6.24761	6.42757	4.67153	6.27011	3.78029	7.1322		#N/A
CEP164	ENSG00000110274	CEP164	-0.291815	0.0614649		9.40971	9.28987	9.38904	8.90749	9.54324	9.25206	9.64463	9.27618	9.42277	9.15683	9.54587	9.32049		#N/A
PHLDA1	ENSG00000139289	PHLDA1	0.618676	0.0615248		11.28	11.6406	10.9202	11.6295	10.8025	11.6172	10.3673	11.171	10.4167	10.9365	10.4097	10.9869		#N/A
ADAMTS18	ENSG00000140873	ADAMTS18	0.861453	0.0615248		9.25183	9.31411	10.2423	11.2961	10.3463	11.2965	9.84323	10.9429	10.4745	11.1142	9.60872	10.7197		#N/A
HSPB11	ENSG00000081870	HSPB11	0.293766	0.0615248		8.13052	8.36172	8.12986	8.22701	8.08996	8.38386	8.02033	8.5151	7.82385	8.16021	8.09094	8.35869		#N/A
TFAP2E	ENSG00000116819	TFAP2E	-0.858338	0.0615248		6.26334	5.73271	6.39193	4.82688	6.75943	6.11254	5.70013	5.64076	7.27843	6.27011	7.08201	6.14428		#N/A
TUBB8P1	ENSG00000229298	TUBB8P1	1.55729	0.0615424		3.72754	4.4803	3.53815	4.97403	3.86308	5.29691	3.38682	3.07258	3.32417	3.73482	2.68593	4.96609		#N/A
HMGN4	ENSG00000182952	HMGN4	-0.20446	0.062857		9.66107	9.38864	9.66425	9.57386	9.83936	9.40729	9.81542	9.62797	9.59296	9.46456	9.63104	9.50349		#N/A
FDX1	ENSG00000137714	FDX1	0.368382	0.0630681		8.3457	8.66907	8.67471	8.9302	8.39137	8.79898	8.15721	8.51162	8.15052	8.57188	8.04291	8.48517		#N/A
CASP2	ENSG00000106144	CASP2	0.17823	0.0631627		9.80968	10.0178	9.79215	10.0374	9.81703	9.98845	9.82279	10.0432	9.93951	9.90784	9.74186	9.99038		#N/A
TMEM187	ENSG00000177854	TMEM187	-0.954852	0.0631627		5.18439	4.76244	5.29381	4.26592	4.95254	4.52446	6.13845	5.23025	5.98404	5.27027	5.88734	4.45007		#N/A
MIOS	ENSG00000164654	MIOS	0.43771	0.0632197		8.81425	9.12774	9.40128	10.1187	9.2418	9.56823	9.13528	9.61828	9.28845	9.63599	9.13341	9.49599		#N/A
BSPRY	ENSG00000119411	BSPRY	-0.516705	0.0632197		6.98318	6.60779	7.22567	6.71885	6.86477	6.3711	6.63016	6.09649	7.04489	6.14007	7.0292	6.74668		#N/A
KIAA1958	ENSG00000165185	KIAA1958	-0.764522	0.0639796		7.90561	7.45644	8.68476	7.85682	9.10413	8.16921	9.17958	8.75207	8.88372	7.98188	9.30613	8.3954		#N/A
CLCN6	ENSG00000011021	CLCN6	0.305361	0.0641351		9.3368	9.67223	9.24707	9.72568	9.44959	9.7991	9.60244	9.75424	9.36753	9.48613	9.55524	9.93743		#N/A
BCL9L	ENSG00000186174	BCL9L	0.508439	0.0641793		11.2719	11.6716	11.2228	11.8498	11.0029	11.7477	10.5892	11.125	11.1031	11.342	10.785	11.2605		#N/A
TAMM41	ENSG00000279643	TAMM41	-0.308606	0.0641793		7.61372	7.2526	7.46992	7.05272	7.55506	7.26114	7.28792	7.11926	7.71594	7.34279	7.51225	7.34731		#N/A
CCDC88C	ENSG00000015133	CCDC88C	-0.367133	0.0643223		9.96624	9.72414	9.62304	9.31032	9.82638	9.27438	9.79008	9.33059	9.52054	9.22257	9.59515	9.24874		#N/A
AFF4	ENSG00000072364	AFF4	0.392631	0.0644563		12.0072	12.1922	11.4762	12.0458	11.5414	11.9967	11.3976	11.7683	11.6062	11.987	11.3219	11.7499		#N/A
MIR22HG	ENSG00000282800	MIR22HG	1.0681	0.0645851		9.61503	10.1716	8.56655	9.89571	8.13879	9.30877	7.11622	8.42536	8.55169	9.51002	7.75382	9.20116		#N/A
TRIM26	ENSG00000231002	TRIM26	0.226584	0.0645851		9.74314	9.97281	10.0249	10.0499	9.75379	10.0019	9.68563	10.0359	9.80739	9.94726	9.69318	10.0733		#N/A
NCAPG	ENSG00000109805	NCAPG	-0.466303	0.0647205		8.935	8.79968	9.59667	8.98546	9.89549	9.25527	9.98266	9.40572	9.34101	9.01562	9.66893	9.24204		#N/A
RBM12B	ENSG00000183808	RBM12B	-0.292337	0.0647205		9.17025	8.80901	9.40128	9.0656	9.31532	9.25206	9.55189	9.27001	9.35433	8.97042	9.46534	9.15433		#N/A
SUN1	ENSG00000164828	SUN1	0.425285	0.0648745		11.5651	11.8627	10.9441	11.8025	11.1516	11.6794	11.0284	11.2421	11.2329	11.6006	11.103	11.3243		#N/A
PANK1	ENSG00000152782	PANK1	-0.647532	0.0648745		8.06976	7.61386	9.38699	8.78824	9.57241	8.40135	9.37671	8.81279	8.88372	8.54643	9.21449	8.51883		#N/A
ZXDC	ENSG00000070476	ZXDC	0.223287	0.0648745		8.55081	8.80901	8.53357	8.64182	8.45058	8.7035	8.32437	8.67629	8.60997	8.77832	8.70996	8.91127		#N/A
STON1	ENSG00000243244	STON1	-0.672443	0.0648745		6.78575	6.23561	7.65849	7.30294	7.32125	6.48486	7.49399	6.58174	7.77939	7.04142	7.41268	6.82052		#N/A
ZNF204P	ENSG00000204789	ZNF204P	-0.759385	0.0649028		7.48001	6.78223	8.6199	7.648	8.83458	8.02622	8.94849	8.23986	8.73162	8.12626	8.48333	7.73236		#N/A
ZNF316	ENSG00000205903	ZNF316	0.240348	0.0650017		9.23256	9.4031	9.42745	9.85712	9.38528	9.65099	9.35857	9.58053	9.31594	9.37489	9.08248	9.35195		#N/A
PCDHA3	ENSG00000255408	PCDHA3	-0.832657	0.06553		5.58259	4.4803	6.42427	5.47189	5.37558	4.60719	6.28224	5.42063	5.6799	4.80473	5.67457	5.50318		#N/A
PAIP2B	ENSG00000124374	PAIP2B	-0.928409	0.0657991		6.77056	5.67942	7.78843	6.80983	7.78717	6.56982	8.11941	7.8725	7.11811	6.31902	8.12069	6.83246		#N/A
BRD9	ENSG00000028310	BRD9	0.261316	0.0658477		9.54979	9.82267	9.48992	9.68352	9.19927	9.60643	9.22923	9.56549	9.36001	9.52834	9.50295	9.68576		#N/A
SFT2D2	ENSG00000213064	SFT2D2	0.317792	0.066137		9.42677	9.62721	9.22658	9.8296	9.29393	9.65828	9.03732	9.31668	9.48465	9.74291	9.44868	9.60448		#N/A
FBXO28	ENSG00000143756	FBXO28	0.333135	0.066137		8.96867	9.27423	8.84568	9.20995	9.0541	9.14192	8.85094	9.37345	8.62575	8.89582	8.54105	8.95837		#N/A
ZNF32	ENSG00000169740	ZNF32	-0.387454	0.066137		7.06017	6.80729	7.30599	7.14881	7.68403	6.99541	7.53764	7.19073	7.06355	6.95123	7.50582	6.86772		#N/A
PROCA1	ENSG00000167525	PROCA1	-0.407519	0.0666029		7.71243	7.27073	7.8008	7.19455	7.72457	7.41832	7.73802	7.37843	8.18075	7.91187	8.11225	7.70012		#N/A
ENSG00000229180	ENSG00000229180	ENSG00000229180	0.329965	0.0666908		8.24487	8.33612	8.26102	8.53326	7.98038	8.65572	7.98398	8.31374	8.0085	8.1669	7.93221	8.35869		#N/A
SBSPON	ENSG00000164764	SBSPON	-1.00265	0.0666908		5.18439	4.28005	3.53815	3.09955	4.1754	4.02002	4.15728	3.46734	5.2294	4.49998	5.25131	3.63911		#N/A
BMF	ENSG00000104081	BMF	-0.757186	0.066703		11.4975	11.6886	12.0443	10.951	11.2205	10.0854	11.8987	10.8713	11.264	10.6846	11.689	10.5079		#N/A
STRBP	ENSG00000165209	STRBP	-0.450337	0.0668068		9.74508	9.22161	10.4869	10.0142	10.7445	10.034	10.6551	10.3996	10.1029	9.84453	10.366	9.85637		#N/A
TBX6	ENSG00000149922	TBX6	-1.15268	0.0668068		4.5637	3.86855	5.42749	4.20762	5.82671	4.60719	5.50871	4.49401	4.85407	4.99732	6.45286	4.96609		#N/A
ENSG00000287270	ENSG00000287270	ENSG00000287270	1.95041	0.067178		2.65801	2.97397	3.13102	4.37589	2.66556	4.24336	2.2995	2.91269	3.44293	5.62168	3.78029	4.51081		#N/A
RNF214	ENSG00000167257	RNF214	-0.29101	0.0671982		8.91441	8.54421	8.96593	8.68519	8.86028	8.22921	8.83645	8.60286	8.6902	8.58693	8.79414	8.62568		#N/A
LIF-AS2	ENSG00000268812	LIF-AS2	1.77862	0.0671982		4.33496	4.71026	3.13102	4.32195	2.37082	5.08235	3.38682	3.21651	3.19475	4.41255	2.26653	4.82969		#N/A
CD55	ENSG00000196352	CD55	1.22199	0.0671983		8.1831	9.27423	10.0023	11.4172	9.00227	9.92738	7.90286	9.09247	9.22357	10.4577	9.20062	10.3496		#N/A
TJP2	ENSG00000119139	TJP2	0.529581	0.0678446		7.29064	7.55589	7.11111	7.74342	6.87921	7.67955	6.75867	7.02465	7.72183	7.98945	7.07335	7.92321		TJP2
EGLN3	ENSG00000129521	EGLN3	0.927156	0.0678446		6.17379	6.51957	5.10716	6.22609	6.46614	7.69854	5.77498	6.58174	5.94433	6.64092	5.36932	6.43812		#N/A
MTA3	ENSG00000057935	MTA3	-0.332373	0.0681837		10.4995	10.1436	10.6419	10.2988	10.3227	9.86151	10.522	9.99535	10.1582	9.99695	10.2165	10.072		#N/A
LARP4	ENSG00000161813	LARP4	0.218134	0.0682628		9.96457	10.1872	9.87347	10.2143	10.1249	10.1661	10.0293	10.1899	9.86303	10.2512	9.84732	9.99703		#N/A
ZNF10	ENSG00000256223	ZNF10	0.46942	0.0683961		7.40328	7.82489	7.73785	7.79382	7.04207	7.42973	7.37872	8.14858	7.56043	8.04138	7.48636	8.11148		#N/A
BRD4	ENSG00000141867	BRD4	0.237852	0.0685354		11.1206	11.2559	11.0293	11.1947	11.1351	11.3841	11.143	11.4143	10.8539	11.0746	10.9866	11.3578		#N/A
SEC62	ENSG00000008952	SEC62	0.255801	0.0685354		10.7981	10.8575	10.4461	10.9008	10.6403	10.7948	10.6691	10.9988	10.5665	10.8806	10.4728	10.7027		#N/A
RND3	ENSG00000115963	RND3	0.673713	0.0686738		11.1922	11.2404	9.93791	11.1455	10.4491	11.0406	9.76428	10.8815	10.9052	11.1492	9.77431	11.0173		#N/A
CCDC77	ENSG00000120647	CCDC77	-0.691035	0.0690575		8.00632	7.62799	8.51116	7.46102	8.43111	7.45228	8.95118	8.33362	7.79064	7.53098	8.81249	8.036		#N/A
NFS1	ENSG00000244005	NFS1	-0.293069	0.0690575		7.65567	7.29751	7.65849	7.47962	7.73255	7.19582	7.68078	7.35529	7.51371	7.36625	7.69853	7.47475		#N/A
PDK2	ENSG00000005882	PDK2	-0.470224	0.0692674		7.75164	7.12885	8.04918	7.37755	7.86178	7.78103	8.11941	7.5782	8.15052	7.76958	7.60539	7.1225		#N/A
SAPCD1	ENSG00000234951	SAPCD1	-0.95524	0.0692674		4.63254	3.96078	5.45906	3.63007	4.71562	4.34327	4.42857	3.77696	4.62204	4.41255	4.86598	4.17778		#N/A
KIF14	ENSG00000118193	KIF14	-0.40535	0.0700755		8.74986	8.59546	9.488	9.0282	9.36234	8.84231	9.56952	9.16524	9.19212	8.72489	9.43182	9.05586		#N/A
MANEA	ENSG00000172469	MANEA	-0.509644	0.0701545		8.01923	7.74285	8.22015	7.55169	8.88553	8.10661	8.62003	8.24826	7.94451	7.65044	8.47018	7.8893		#N/A
DLG3	ENSG00000082458	DLG3	-0.278185	0.0703727		10.322	10.0949	10.1845	9.89571	10.3161	9.97294	10.3056	10.0299	10.0324	9.94532	10.1146	9.65413		DLG3
ARSK	ENSG00000164291	ARSK	-0.524899	0.0704713		7.27995	7.20625	7.50058	6.91377	8.14478	7.20912	7.99446	7.56481	7.71003	7.27003	7.93221	7.39643		#N/A
STARD13	ENSG00000133121	STARD13	1.26313	0.0707089		8.47317	9.06938	8.91561	10.4767	7.65075	9.41592	6.77091	7.39365	8.48058	9.60921	8.17842	9.37051		#N/A
NSUN5P1	ENSG00000223705	NSUN5P1	-0.305059	0.0707892		8.50565	8.30567	8.65099	8.40942	8.42621	8.19619	8.73386	8.44741	8.81381	8.42324	8.59958	8.15494		#N/A
GEMIN5	ENSG00000082516	GEMIN5	-0.311433	0.0710123		9.0621	8.86677	9.12445	8.99411	9.25016	8.71287	9.33403	8.91392	9.03791	8.77832	9.40444	9.08612		#N/A
TMEM116	ENSG00000198270	TMEM116	-0.540697	0.0711067		6.26334	5.78411	7.06055	6.45633	6.5942	5.8993	6.91026	6.33597	6.7661	6.05601	6.55602	6.45367		#N/A
RCOR2	ENSG00000167771	RCOR2	-1.02032	0.0715715		9.28161	8.46768	9.41744	7.75364	9.85953	9.07446	10.6343	9.70474	9.38433	8.00448	10.3053	9.3478		#N/A
SFPQ	ENSG00000116560	SFPQ	0.383796	0.0717203		13.0484	13.5164	13.7247	14.107	13.5943	14.0318	13.7396	14.1551	13.5532	13.8492	13.7234	14.0592		#N/A
CCNJ	ENSG00000107443	CCNJ	0.298644	0.0717203		9.58712	9.9561	9.55162	10.1088	9.97495	10.0926	10.0953	10.1757	9.56377	9.93555	9.4537	9.79359		#N/A
B3GNT5	ENSG00000176597	B3GNT5	0.662237	0.0717203		9.49769	9.84251	8.48839	9.58392	8.90683	9.74304	8.65678	9.18068	8.76904	9.4968	8.40259	8.83909		#N/A
ENTPD1	ENSG00000138185	ENTPD1	-0.836	0.0717203		6.57455	5.90511	7.59596	6.05479	7.9118	6.68855	7.54479	6.84802	7.36371	7.09856	7.77536	7.17035		#N/A
CCNE2	ENSG00000175305	CCNE2	0.591604	0.0717281		5.35706	6.50433	5.99961	6.33903	5.52998	6.70742	5.93587	6.55491	5.72748	5.87162	6.1735	6.20068		#N/A
LPAR3	ENSG00000171517	LPAR3	-1.88462	0.071783		4.69825	2.78507	7.98014	5.84133	7.12923	4.89749	6.0608	4.03173	7.52721	6.11259	7.78601	6.4224		#N/A
ZNF462	ENSG00000148143	ZNF462	0.273553	0.0718945		10.9708	10.9018	10.7575	11.1451	10.68	10.973	10.8872	11.0962	10.555	10.9922	10.5381	10.9572		#N/A
INTS6	ENSG00000102786	INTS6	0.408063	0.0719228		9.84456	10.2468	9.76557	10.3153	9.57906	10.183	9.52142	9.8191	9.66498	9.96658	9.43013	9.644		#N/A
RBM6	ENSG00000004534	RBM6	-0.215779	0.072133		11.2036	10.9025	11.2337	11.0135	11.1238	11.0096	11.2788	11.0314	11.316	11.1159	11.4217	11.2111		#N/A
ARHGAP32	ENSG00000134909	ARHGAP32	-0.324804	0.072133		9.88038	9.75828	10.4588	10.0003	10.3695	9.99807	10.1455	9.75128	10.0652	9.76514	10.3034	10.0298		#N/A
TXK	ENSG00000074966	TXK	0.71533	0.072133		6.91573	7.15836	8.04918	9.14541	8.2706	8.78127	7.16342	8.01221	7.02599	7.38933	6.90768	7.92878		#N/A
LINC00997	ENSG00000281332	LINC00997	-0.831524	0.072133		5.22954	4.59986	5.06675	4.26592	5.91345	4.60719	5.7991	5.12472	5.2294	5.31917	5.7197	4.62512		#N/A
FAM53A	ENSG00000174137	FAM53A	-1.01988	0.072133		4.15945	3.77003	3.94723	3.63007	4.35142	2.74768	3.99975	3.34737	4.62204	3.9977	4.60237	3.52595		#N/A
PRDM2	ENSG00000116731	PRDM2	0.217913	0.0723734		10.1462	10.4514	10.3578	10.5245	10.1233	10.2457	10.194	10.3585	10.1163	10.4007	10.1817	10.4334		#N/A
NKIRAS1	ENSG00000197885	NKIRAS1	-0.38807	0.0724052		6.92947	6.56436	6.87407	6.67649	7.08007	6.29828	6.79509	6.52757	7.04489	6.67888	6.73156	6.4224		#N/A
XKR8	ENSG00000158156	XKR8	-0.44822	0.0724097		7.82701	7.54848	7.29728	6.87684	7.6423	7.3479	7.53764	6.84802	7.57351	7.27003	7.59936	6.89076		#N/A
ALDH3B2	ENSG00000132746	ALDH3B2	-0.686214	0.0724204		6.05342	5.04121	7.51567	6.7701	6.80552	6.56982	6.74632	6.25493	6.16771	5.87162	6.75343	5.69861		#N/A
ADSS2	ENSG00000035687	ADSS2	0.228567	0.0724883		9.65074	9.77584	9.88223	10.3636	10.0049	10.0284	9.91532	10.1	9.65579	9.81073	9.55835	9.91934		#N/A
NR2C1	ENSG00000120798	NR2C1	-0.289863	0.0724883		9.48145	9.23783	9.30033	9.08192	9.34163	8.90087	9.40448	9.04986	9.52054	9.27308	9.82037	9.58166		#N/A
BMP7	ENSG00000101144	BMP7	-0.639725	0.0724883		8.18883	7.52601	8.27882	7.86156	8.35567	7.56004	8.84516	8.50812	8.41671	7.73396	9.0252	8.10164		#N/A
PRELID3A	ENSG00000141391	PRELID3A	-0.557584	0.0724883		6.02809	6.0798	6.21832	5.70047	6.69559	6.08394	6.84227	5.98028	6.75466	5.99713	6.46616	6.16333		#N/A
B3GNT9	ENSG00000237172	B3GNT9	-0.549605	0.0729272		5.83712	5.53688	5.88807	5.00859	5.52998	5.24619	5.77498	5.29654	6.31513	5.93574	6.0375	5.41058		#N/A
C21orf58	ENSG00000160298	C21ORF58	-0.74323	0.0732907		7.4131	7.29751	8.25203	7.2819	8.23174	7.57038	8.99097	8.06547	8.29962	7.46733	8.70154	8.02563		#N/A
FBXL3	ENSG00000005812	FBXL3	0.388083	0.0732907		8.52841	8.9079	8.51867	9.10805	8.33487	8.31169	8.37738	8.75796	8.63201	9.12624	8.50927	8.8684		#N/A
PCDHA12	ENSG00000251664	PCDHA12	0.523193	0.0732907		6.1967	6.54958	6.12299	6.92286	6.28279	6.44043	5.67429	6.36715	5.90349	6.52063	5.92637	6.219		#N/A
E2F3	ENSG00000112242	E2F3	0.335608	0.0734397		9.4603	9.60773	8.99044	9.56952	9.46642	9.7747	9.57826	9.7169	9.1293	9.60675	9.30613	9.72794		#N/A
ZNF530	ENSG00000183647	ZNF530	0.538571	0.0735484		6.02809	6.93783	6.48687	7.23889	6.34653	6.85013	6.85383	7.31587	6.55816	6.71587	6.83775	7.24376		#N/A
ACBD4	ENSG00000181513	ACBD4	-0.652251	0.0738507		6.52108	5.80913	7.19787	6.36593	6.34653	5.8993	6.89915	6.2715	6.7661	6.24503	7.24527	6.68212		#N/A
ZNF318	ENSG00000171467	ZNF318	-0.34699	0.0739327		9.69968	9.37823	9.90963	9.49835	10.1813	9.55266	10.0508	9.80209	9.65579	9.52834	10.0858	9.75958		#N/A
SYNDIG1	ENSG00000101463	SYNDIG1	-0.750802	0.0739497		5.51126	4.4803	6.83851	5.86037	6.2609	5.24619	5.91396	5.93937	5.55361	5.0562	6.07272	5.37835		#N/A
C22orf24	ENSG00000128254	C22ORF24	1.3939	0.0743969		3.9596	4.4803	3.13102	4.93862	3.30185	5.24619	4.48911	3.86697	2.51569	4.49998	3.39138	4.51081		#N/A
NUP88	ENSG00000108559	NUP88	0.30605	0.0746303		9.21021	9.31848	9.14158	9.69019	9.26947	9.48591	9.0014	9.30263	9.10249	9.18018	8.89597	9.44243		#N/A
ABHD11	ENSG00000106077	ABHD11	0.489925	0.0746303		8.63711	8.72274	8.71776	9.373	9.08868	9.57852	8.38934	8.81562	8.60679	8.98943	8.34253	9.17794		#N/A
NOM1	ENSG00000146909	NOM1	0.302351	0.0746502		8.6579	9.13766	8.92977	9.31895	9.06045	9.17619	9.004	9.33651	8.7944	9.02302	9.11029	9.3746		#N/A
ANKRA2	ENSG00000164331	ANKRA2	-0.399202	0.0746502		8.09437	7.71	8.27439	7.71231	8.13879	7.80751	7.86338	7.25048	7.90884	7.68816	8.20644	7.93987		#N/A
PRR14L	ENSG00000183530	PRR14L	0.268655	0.074997		10.4201	10.7166	10.3185	10.7934	10.606	10.8783	10.3963	10.4829	10.349	10.5566	10.2857	10.5365		#N/A
SMG1P2	ENSG00000205534	SMG1P2	0.76379	0.0750105		5.08963	6.12036	4.89273	6.03816	4.71562	5.19362	5.35454	5.64076	4.67153	5.11277	5.12278	5.61807		#N/A
RBM27	ENSG00000091009	RBM27	0.379069	0.0753358		7.69644	7.97619	7.80695	8.28102	8.21476	8.37208	8.26502	8.52204	7.61837	8.15348	7.89333	8.44293		#N/A
ZEB1-AS1	ENSG00000237036	ZEB1-AS1	-0.945539	0.0753897		5.13779	4.81281	5.18475	4.01709	5.24787	4.02002	5.7991	4.17958	5.05391	4.66039	4.33864	4.38666		#N/A
ZNF48	ENSG00000180035	ZNF48	0.36207	0.0756487		9.0113	9.41333	9.02776	9.3155	9.05728	9.48317	9.15876	9.53148	8.52501	8.88368	8.676	8.95291		#N/A
ZBTB9	ENSG00000236515	ZBTB9	0.493924	0.0757678		8.28819	8.49878	7.55272	8.67716	8.05859	8.78127	8.40514	8.71921	7.87755	8.02673	8.05176	8.54084		#N/A
CCDC134	ENSG00000100147	CCDC134	-0.57809	0.076155		5.92208	5.70631	5.74173	5.36926	6.04735	5.86609	6.47417	5.50717	5.86146	5.31917	6.18963	5.34538		#N/A
ENSG00000287126	ENSG00000287126	ENSG00000287126	-1.10423	0.0764365		4.98821	4.34994	5.42749	4.08344	6.44688	5.29691	6.63016	5.61502	5.83997	5.21966	5.25131	3.84184		#N/A
RNF25	ENSG00000163481	RNF25	0.441115	0.0764773		8.38114	8.50262	7.85521	8.31593	7.52782	8.26787	7.8519	8.16198	7.64957	8.2258	7.67006	8.17854		#N/A
CYP27B1	ENSG00000111012	CYP27B1	0.928056	0.0765464		4.24987	4.99833	3.6518	3.87449	3.74189	4.68542	3.72559	4.92963	4.28307	4.66039	3.86309	4.62512		#N/A
URI1	ENSG00000105176	URI1	-0.184824	0.0766602		9.88038	9.65508	10.123	9.82718	10.1233	9.9414	9.92219	9.83731	9.89593	9.76734	9.93964	9.76426		#N/A
HSPA8	ENSG00000109971	HSPA8	0.360911	0.0768045		14.0973	14.5629	13.6267	14.1971	13.7731	14.2214	13.703	13.9391	13.8244	14.0108	13.7797	13.9661		#N/A
ZNF611	ENSG00000213020	ZNF611	0.612602	0.0768816		8.91095	8.97025	8.24299	9.16086	7.74837	8.57067	7.78103	8.24406	8.18501	8.79571	7.95598	8.78171		#N/A
MAFG-DT	ENSG00000265688	MAFG-DT	-0.73592	0.0771461		5.18439	5.31023	5.6073	4.42788	6.2609	5.19362	5.64798	5.26377	5.57977	4.93594	5.65146	4.82969		#N/A
UNC5CL	ENSG00000124602	UNC5CL	-0.785544	0.0773244		5.13779	4.71026	5.39521	4.74726	5.41576	4.43671	5.95746	5.04982	5.70389	4.49998	5.76347	5.53278		#N/A
DROSHA	ENSG00000113360	DROSHA	-0.273652	0.0774059		10.7446	10.4741	10.7928	10.4031	10.9328	10.6596	11.089	10.8362	10.7888	10.527	10.8763	10.6673		#N/A
RAPGEF2	ENSG00000109756	RAPGEF2	0.55767	0.0776752		10.7999	10.8894	11.0254	11.5181	10.3605	10.7465	10.117	11.1335	10.7454	11.0818	10.5607	11.559		RAPGEF2
FRAT1	ENSG00000165879	FRAT1	-0.731312	0.0776752		5.27331	5.27473	5.39521	4.37589	5.45485	4.75963	5.21813	4.24819	5.0161	4.87182	5.69731	4.67905		#N/A
ENSG00000280120	ENSG00000280120	ENSG00000280120	-1.12194	0.0783541		4.33496	3.14098	4.11516	3.44059	4.58076	3.60277	3.91402	2.73285	4.46249	3.87224	4.78334	4.25082		#N/A
CCNG2	ENSG00000138764	CCNG2	-0.577061	0.0784093		9.93591	9.98659	10.942	10.0746	10.288	9.16599	10.665	10.0262	10.2818	10.095	10.4786	9.72474		#N/A
AHNAK	ENSG00000124942	AHNAK	0.990286	0.0784404		14.1728	14.5937	13.5917	14.9895	12.5824	14.1615	11.825	13.1512	14.1815	14.7219	13.5035	14.2166		#N/A
NUDT15	ENSG00000136159	NUDT15	0.293857	0.0786223		9.26815	9.46149	8.96042	9.25742	8.99234	9.2807	8.96457	9.32663	8.81931	9.06305	9.01844	9.37255		#N/A
NCAPD3	ENSG00000151503	NCAPD3	-0.418741	0.0788312		9.09601	9.04852	9.50133	8.8299	9.87222	9.36632	9.80057	9.33454	9.37128	9.05224	9.69035	9.23306		#N/A
ZNFX1	ENSG00000124201	ZNFX1	0.68057	0.0789286		9.45556	9.88726	8.43779	9.51347	8.39137	9.21627	7.97871	8.46554	8.78318	9.35744	8.49636	9.0482		#N/A
ZNF189	ENSG00000136870	ZNF189	0.266122	0.0791162		8.54636	8.73259	8.92695	8.99195	8.70682	9.08532	8.53285	8.94267	8.58758	8.74739	8.33166	8.75056		#N/A
ENSG00000187951	ENSG00000187951	ENSG00000187951	-0.641701	0.0792502		7.16846	6.74381	8.2016	6.91377	7.96692	7.65058	7.77497	7.25882	7.90367	7.48886	8.2609	7.50492		#N/A
ZNF202	ENSG00000166261	ZNF202	0.355232	0.0793464		8.37613	8.78714	8.74683	9.06765	8.28151	8.92526	8.5578	9.03537	8.69917	8.81714	8.84595	9.05331		#N/A
CRELD2	ENSG00000184164	CRELD2	0.393927	0.0794207		8.22828	8.4238	8.13963	8.73248	7.8398	8.39554	8.05579	8.28953	7.89328	8.01935	8.02053	8.56968		#N/A
MLLT3	ENSG00000171843	MLLT3	-0.586711	0.0794207		7.57926	6.99348	7.27971	6.70837	8.19181	6.97997	7.73177	7.60461	7.53392	6.90393	7.74293	7.37208		#N/A
ANKLE1	ENSG00000160117	ANKLE1	-0.918444	0.0794207		6.60912	6.19821	6.80204	5.49645	6.74373	6.46282	7.34636	6.5137	6.63502	4.66039	7.44664	6.45367		#N/A
SLC44A3-AS1	ENSG00000224081	SLC44A3-AS1	-0.602183	0.0794207		7.07261	6.32508	6.56148	5.96965	6.94932	6.19509	6.19406	5.5888	6.3611	5.90403	6.7205	6.46906		#N/A
NCK1-DT	ENSG00000239213	NCK1-DT	-0.665117	0.0794207		5.35706	5.41175	5.93373	4.70574	6.02155	5.02333	5.99969	5.12472	5.32529	5.36647	5.53	4.92204		#N/A
ADPRS	ENSG00000116863	ADPRS	0.468826	0.0794719		8.49644	8.89627	8.38124	9.11203	8.13879	8.81647	8.22553	8.58308	8.35746	8.63601	7.94176	8.20635		#N/A
CREM	ENSG00000095794	CREM	0.45827	0.0794719		8.00632	8.30127	7.24391	8.17851	8.00692	8.40135	7.68725	8.15753	7.63093	7.82142	7.59936	8.08176		#N/A
SLC38A2	ENSG00000134294	SLC38A2	0.342397	0.0797256		11.87	12.0845	11.4151	11.9041	11.8958	12.1255	11.2975	11.8585	11.6423	11.9003	11.6152	11.9791		#N/A
MED13	ENSG00000108510	MED13	0.233562	0.0802735		10.4503	10.586	10.4421	10.8191	10.3999	10.4928	10.5806	10.8693	10.3318	10.6018	10.3409	10.5474		#N/A
RNGTT	ENSG00000111880	RNGTT	-0.299351	0.0802735		8.99832	8.58825	8.66459	8.36343	8.88553	8.58604	8.96457	8.65749	8.62261	8.40636	8.77822	8.54448		#N/A
TRIM63	ENSG00000158022	TRIM63	1.22407	0.0802735		3.2897	3.14098	3.53815	5.22976	3.30185	4.96178	3.62126	4.37633	3.44293	3.58292	2.8573	3.63911		#N/A
TBC1D2B	ENSG00000167202	TBC1D2B	-0.50758	0.0807645		8.15997	7.82489	8.85757	8.32624	8.43601	8.28052	8.295	7.67483	8.79719	8.20643	8.4996	7.74506		#N/A
USP13	ENSG00000058056	USP13	-0.375641	0.0807645		8.57287	8.12313	8.89556	8.32966	8.95193	8.3602	8.82768	8.62238	8.71696	8.2762	8.85103	8.78171		#N/A
C15orf40	ENSG00000169609	C15ORF40	-0.358665	0.0807645		7.82701	7.84318	8.40575	7.82809	8.18601	7.60098	8.12419	7.93627	8.29568	7.81291	8.29858	8.02563		#N/A
DLX2	ENSG00000115844	DLX2	0.707632	0.0808279		8.49182	9.16699	9.12937	9.87713	9.08557	9.96904	10.1525	10.7583	8.6932	9.74514	9.30242	9.71993		#N/A
HILPDA	ENSG00000135245	HILPDA	-0.459824	0.0808279		8.08825	7.56327	7.90763	7.26771	7.87625	7.60098	8.13843	8.07966	7.94451	7.31894	8.28738	7.59884		#N/A
NUDT12	ENSG00000112874	NUDT12	-0.441377	0.0808528		7.91254	7.32379	8.26102	7.76884	8.39137	8.12778	8.45531	8.02693	8.35746	7.70665	8.36756	8.11637		#N/A
RAB34	ENSG00000109113	RAB34	0.381706	0.0809071		10.9071	11.0443	10.248	10.8694	10.3528	10.9204	10.2585	10.6617	10.4649	10.5503	10.3481	10.8244		#N/A
MGME1	ENSG00000125871	MGME1	-0.349769	0.0809071		8.75758	8.6928	9.2448	8.82021	9.18772	8.49665	9.25342	9.01337	9.04732	8.64082	9.21843	8.93085		#N/A
ENSG00000257285	ENSG00000257285	ENSG00000257285	-0.786247	0.0811796		4.5637	3.66427	5.06675	4.47807	4.71562	4.02002	4.98577	4.31368	5.0161	4.41255	4.55334	4.10084		#N/A
ENSG00000255284	ENSG00000255284	ENSG00000255284	-0.649048	0.081209		6.10278	5.5066	6.65986	6.16613	5.94124	5.96351	6.13845	5.26377	6.33062	5.36647	5.94549	5.16816		#N/A
SSBP3-AS1	ENSG00000198711	SSBP3-AS1	0.662334	0.0813776		5.65055	5.97312	4.84573	6.11946	4.71562	5.34592	4.70867	5.5621	5.6799	5.76975	5.82673	6.20068		#N/A
MPZL3	ENSG00000160588	MPZL3	0.709897	0.0814791		7.20282	7.60674	7.01879	7.93076	7.59934	8.19619	6.15723	7.34749	6.79987	7.24495	6.5807	7.42827		#N/A
ENSG00000246451	ENSG00000246451	ENSG00000246451	0.427764	0.0814791		6.69209	7.12885	6.61852	7.17946	6.6288	7.0258	6.33267	6.62108	6.49083	7.15353	6.98367	7.1225		#N/A
NSUN2	ENSG00000037474	NSUN2	0.340761	0.081558		10.5493	10.7396	9.91817	10.5027	10.105	10.4246	9.94263	10.2549	10.0133	10.3368	10.1562	10.4797		#N/A
CYP2R1	ENSG00000186104	CYP2R1	-0.44414	0.0817553		7.25833	6.44169	7.00816	6.96746	7.53696	6.8837	7.27937	7.11926	7.41546	7.09856	7.28335	6.65546		#N/A
CDKN2B	ENSG00000147883	CDKN2B	1.12597	0.0817692		11.4695	11.9885	10.7858	12.0954	9.93058	11.4239	8.22553	10.042	11.3135	12.0253	10.4445	11.8648		#N/A
PLCD4	ENSG00000115556	PLCD4	0.567555	0.0819485		5.61697	6.23561	5.3622	6.26949	5.4929	6.27317	5.89171	6.33597	6.11503	5.73413	5.69731	6.51427		#N/A
OSER1	ENSG00000132823	OSER1	0.474811	0.0827786		8.40594	8.80901	8.43779	9.358	8.3401	8.65085	8.4591	8.44376	8.6568	9.0985	8.18246	8.79398		#N/A
CREG2	ENSG00000175874	CREG2	1.37584	0.0827817		5.80766	6.21703	3.41478	6.49341	4.83894	6.54904	3.82288	5.01086	5.83997	5.62168	4.15365	5.79944		#N/A
C6orf62	ENSG00000112308	C6ORF62	0.360688	0.0831953		9.8892	10.3802	9.77657	10.3811	9.63756	9.7991	9.7065	10.1081	9.84157	10.0007	9.65011	9.8882		#N/A
TENT4A	ENSG00000112941	TENT4A	0.327362	0.0831953		9.44364	9.78848	9.77029	10.3161	9.99663	10.3027	9.81246	10.0456	9.85769	10.2338	9.77164	9.91934		#N/A
PANX1	ENSG00000110218	PANX1	0.459339	0.0831953		9.09906	9.53458	8.22933	9.11402	8.77018	9.30877	8.9831	9.27413	8.70215	9.13992	8.71275	8.91689		#N/A
LRFN3	ENSG00000126243	LRFN3	-0.274997	0.0834721		8.13646	7.94266	8.42586	7.99249	8.59317	8.26787	8.59615	8.28137	7.98422	7.92772	8.17031	7.8893		#N/A
ENSG00000177788	ENSG00000177788	ENSG00000177788	-0.553276	0.0835791		6.32704	5.5066	6.70004	6.2407	6.55876	5.86609	6.51841	6.63396	6.47698	5.76975	6.77498	6.02442		#N/A
LRATD2	ENSG00000168672	LRATD2	0.893212	0.0840931		12.781	13.2691	10.9307	12.6239	11.1093	11.8721	10.5719	11.6592	11.9995	12.4791	11.0493	11.9413		#N/A
CHSY1	ENSG00000131873	CHSY1	0.247841	0.0843586		9.65074	9.9589	9.7449	9.84163	9.75183	10.1524	9.90841	10.0564	9.59457	9.97041	9.55057	9.68576		#N/A
EPSTI1	ENSG00000133106	EPSTI1	0.628262	0.0843586		7.27995	7.54103	7.60305	8.1823	7.53696	8.18276	7.41037	8.103	8.227	8.61168	7.78601	8.80917		#N/A
FUT10	ENSG00000172728	FUT10	-0.506926	0.0843586		8.6579	8.35749	8.20626	7.62591	8.4064	7.51789	7.8169	7.41619	8.17217	7.83829	8.0995	7.59884		#N/A
PBK	ENSG00000168078	PBK	-0.383738	0.084535		7.98673	7.66273	8.42985	8.0011	8.85663	8.42435	8.79508	8.37639	8.39109	8.01193	8.25324	7.99406		#N/A
ARFIP2	ENSG00000132254	ARFIP2	0.246703	0.0847599		9.98281	9.97004	9.86907	10.1711	9.57906	10.019	9.72392	10.0189	9.73503	9.95115	9.7295	9.98102		#N/A
AK6	ENSG00000279247	AK6	0.368798	0.0851052		6.90185	7.16807	6.342	6.96746	6.67918	6.91651	6.63016	7.19073	6.70799	7.1125	7.02021	7.08304		#N/A
ENSG00000228549	ENSG00000228549	ENSG00000228549	-1.83215	0.0851052		2.90062	2.31157	4.03364	2.65209	5.82671	3.60277	3.72559	3.46734	3.92331	2.99847	4.64978	3.52595		#N/A
ST3GAL5	ENSG00000115525	ST3GAL5	0.717974	0.0855511		8.06354	8.34898	6.8143	8.38989	8.13277	9.0037	7.37872	8.17525	7.82385	7.93559	7.40579	8.2155		#N/A
RAD54L2	ENSG00000164080	RAD54L2	0.333061	0.0856828		9.80223	10.0338	10.0288	10.1863	9.41779	9.99615	9.56426	9.99784	9.63099	9.97232	9.87626	10.1893		#N/A
CARD8	ENSG00000105483	CARD8	-0.442472	0.0861739		8.75758	8.52167	8.55199	8.04754	8.87476	8.27421	9.17498	8.80996	8.89158	8.49947	8.83317	8.25154		#N/A
PHLDB2	ENSG00000144824	PHLDB2	0.777868	0.0868613		9.87329	10.1704	8.72102	10.3502	8.47456	9.48591	8.41687	8.45105	9.47945	10.045	9.20062	9.77977		#N/A
SHISA2	ENSG00000180730	SHISA2	0.749403	0.0869414		6.10278	7.32379	6.57596	8.02662	7.38335	7.66996	6.94309	7.2998	6.88625	7.69744	6.23698	6.30726		#N/A
CERS1	ENSG00000223802	CERS1	-0.595576	0.0869549		5.94932	5.41175	5.88807	5.04234	5.99527	5.64898	5.95746	5.76303	5.6799	4.93594	6.2677	5.53278		#N/A
EEF1AKMT3	ENSG00000123427	EEF1AKMT3	-0.65859	0.0870001		6.15051	4.99833	5.79218	4.90233	5.56613	4.89749	5.59387	5.26377	6.2351	5.69761	5.34071	5.37835		#N/A
CCDC82	ENSG00000149231	CCDC82	0.404042	0.0872617		10.0754	10.2617	9.70761	10.2437	9.52499	9.81876	9.74734	10.1602	10.1819	10.6623	9.60721	10.0883		#N/A
TSPEAR-AS1	ENSG00000235890	TSPEAR-AS1	-0.638369	0.0873576		6.38804	6.01675	4.93824	4.82688	5.91345	5.13906	5.82281	4.54944	6.43461	5.76975	6.1071	5.87069		#N/A
CCNL1	ENSG00000163660	CCNL1	0.233962	0.0874532		10.9304	11.041	10.8675	11.258	10.9285	11.1025	10.7409	10.9552	10.8275	10.956	10.8955	11.25		#N/A
ZFAND5	ENSG00000107372	ZFAND5	0.476604	0.0877505		11.71	11.9977	10.8211	11.4828	11.1478	11.7397	11.048	11.4535	11.0963	11.4828	10.8288	11.4254		#N/A
ABHD10	ENSG00000144827	ABHD10	-0.336495	0.08778		7.98014	7.74285	8.40979	7.82809	8.46501	8.0111	8.45531	8.17084	8.23525	7.98188	8.35689	8.16915		#N/A
TAS2R14	ENSG00000261984	TAS2R14	0.880386	0.08778		3.72754	4.59986	3.94723	4.66299	3.11927	4.136	4.15728	4.60281	3.92331	4.66039	4.27957	4.87661		#N/A
TRANK1	ENSG00000168016	TRANK1	-1.01766	0.088185		8.75372	7.43248	9.89959	8.61404	10.7901	9.73616	10.6166	9.68012	10.3375	9.43436	10.2322	9.3077		#N/A
CYP39A1	ENSG00000146233	CYP39A1	-0.775765	0.088185		5.27331	4.90855	6.14257	5.39561	6.23868	5.48366	6.87667	6.13323	6.3611	4.99732	5.983	5.69861		#N/A
TLE3	ENSG00000140332	TLE3	-0.397325	0.0882296		10.5648	10.5401	11.444	10.3769	10.8871	10.6413	11.0001	10.8842	10.951	10.5566	11.0848	10.6224		#N/A
CEP85	ENSG00000130695	CEP85	-0.411765	0.0882296		8.82532	8.76812	9.2448	8.95034	9.49717	8.88023	9.43173	9.03051	9.62315	9.21935	9.41305	8.82121		#N/A
FZD4	ENSG00000174804	FZD4	-0.56496	0.0882296		7.75936	7.69665	7.22567	6.74982	7.56403	6.85013	8.06576	7.2917	8.43115	8.05588	8.55357	7.79476		#N/A
PFKFB3	ENSG00000170525	PFKFB3	0.819098	0.0884772		9.8892	10.186	8.26549	9.13958	9.17021	10.3119	8.49276	9.52804	8.74613	9.61656	8.62056	9.44243		#N/A
GOSR1	ENSG00000108587	GOSR1	0.18606	0.0886531		9.77394	9.97281	9.81825	9.92879	9.77132	9.81005	9.84612	9.95871	9.73358	10.0156	9.64573	10.0063		#N/A
CHST6	ENSG00000183196	CHST6	-0.745606	0.0886531		7.09718	6.48892	6.37548	5.70047	6.83545	5.8993	7.50869	6.25493	6.34594	5.76975	6.59288	6.49935		#N/A
UTP25	ENSG00000117597	UTP25	0.291844	0.0887329		8.87943	9.19812	8.59525	8.94589	8.70682	8.73143	8.51476	8.87106	8.56485	8.79571	8.74586	9.15195		#N/A
AP5B1	ENSG00000254470	AP5B1	0.398552	0.0889167		9.84637	9.92496	9.64207	10.2464	9.79816	10.0636	9.17958	9.6199	9.65579	10.1518	9.73638	10.2192		#N/A
MYC	ENSG00000136997	MYC	1.22085	0.0896067		9.10209	9.67223	6.51718	8.66908	7.61668	9.34839	6.77091	8.09371	7.09109	8.13312	7.3779	7.95634		#N/A
SYT13	ENSG00000019505	SYT13	1.51426	0.0903328		5.13779	5.97312	5.66259	7.68586	7.06752	8.2551	8.42076	9.39819	5.6307	7.54132	6.92706	8.85382		#N/A
ARHGEF11	ENSG00000132694	ARHGEF11	-0.236845	0.0903754		10.115	9.89897	10.1951	9.7842	10.2001	9.95726	10.3077	10.1867	10.2628	10.0594	10.1654	9.92353		#N/A
TMEM198	ENSG00000188760	TMEM198	0.739398	0.0903754		5.22954	5.78411	4.33527	5.44691	4.71562	5.34592	4.60306	5.29654	5.55361	5.41226	4.27957	5.61807		#N/A
DEPDC4	ENSG00000166153	DEPDC4	-0.758806	0.0904579		4.87912	4.4803	5.32841	4.78762	4.71562	4.68542	5.47917	4.88724	5.32529	4.66039	5.78487	4.32034		#N/A
TOP2A	ENSG00000131747	TOP2A	-0.528999	0.0908262		11.5412	11.202	12.4562	11.8185	12.5557	11.8737	12.6954	12.2074	12.2245	11.833	12.572	11.9871		#N/A
MAFF	ENSG00000185022	MAFF	0.741591	0.0908702		8.86162	9.34225	8.42186	9.46141	8.73091	9.43869	7.55898	8.80996	8.29568	8.53095	7.73196	8.63934		#N/A
SPDYE5	ENSG00000170092	SPDYE5	1.02247	0.0909283		3.59583	4.71026	4.33527	5.07531	3.46391	5.02333	3.91402	3.9517	4.07814	5.1672	3.9414	4.17778		#N/A
TAC1	ENSG00000006128	TAC1	2.23746	0.0911832		4.93469	5.70631	2.56175	5.10755	2.37082	4.60719	2.2995	4.31368	3.74986	3.22064	2.26653	3.84184		#N/A
SQSTM1	ENSG00000161011	SQSTM1	0.893699	0.0912229		11.4524	12.102	10.2826	11.3268	9.99829	11.2007	9.50319	10.6316	10.4348	10.9646	9.74732	10.637		#N/A
SNAP25	ENSG00000132639	SNAP25	0.88199	0.0912229		5.71546	5.56654	4.93824	5.07531	5.29171	6.39458	4.65683	6.03955	4.93736	5.49971	4.64978	6.25495		#N/A
LUZP1	ENSG00000169641	LUZP1	0.434782	0.0918729		11.6396	11.8194	11.0088	11.6166	10.7217	11.2254	10.9274	11.3139	11.0397	11.5668	10.865	11.3238		#N/A
TRAF6	ENSG00000175104	TRAF6	0.357526	0.0920299		9.02096	9.36984	8.59525	9.13958	8.45541	8.89677	8.53285	8.86288	8.79719	8.88773	8.57215	8.89996		#N/A
SIVA1	ENSG00000184990	SIVA1	0.301116	0.0920299		8.51479	8.79028	8.41383	8.82506	8.57555	8.9922	8.59615	8.85465	8.48405	8.64082	8.80465	9.06855		#N/A
CEBPB	ENSG00000172216	CEBPB	0.691111	0.0920299		7.25833	7.87316	7.52316	8.18608	7.1884	7.85906	6.31605	7.28355	6.85446	7.28242	6.51819	7.32211		#N/A
ITPRIPL1	ENSG00000198885	ITPRIPL1	-0.461425	0.0920299		6.7552	6.64996	7.25294	6.85801	7.72457	7.22231	7.60073	7.30786	7.29432	6.71587	7.50582	6.80847		#N/A
ZBTB49	ENSG00000168826	ZBTB49	0.500359	0.0920299		6.69209	7.22497	6.82645	7.00217	6.69559	6.93264	6.74632	7.43102	6.16771	6.99703	6.1735	6.51427		#N/A
B3GNTL1	ENSG00000277033	B3GNTL1	-0.525305	0.0920299		6.65948	5.88171	6.61852	5.952	6.48515	5.96351	6.70863	6.5137	6.95781	6.1935	6.98367	6.7212		#N/A
ENSG00000204055	ENSG00000204055	ENSG00000204055	-0.777943	0.0920299		5.03981	4.20661	5.6073	5.22976	5.15599	4.89749	5.06745	4.49401	5.12669	3.87224	5.50443	4.5691		#N/A
ENSG00000234869	ENSG00000234869	ENSG00000234869	1.53518	0.0920299		4.15945	5.08285	3.13102	5.04234	2.66556	4.02002	2.75886	3.21651	4.0028	4.41255	3.01047	3.84184		#N/A
CREB5	ENSG00000146592	CREB5	1.38479	0.0927936		8.44952	9.0925	6.37548	8.32966	6.2609	7.72656	5.67429	7.50298	7.39351	8.60183	4.86598	6.79632		#N/A
TPPP	ENSG00000171368	TPPP	1.18835	0.0928253		4.93469	5.70631	4.46533	5.49645	5.10775	6.08394	4.94313	5.42063	3.83919	5.96676	3.39138	3.93344		#N/A
PTS	ENSG00000150787	PTS	0.395752	0.0928379		8.16579	8.16251	7.65849	8.33308	7.8398	8.28052	7.83451	8.25244	8.28777	8.43992	8.37463	8.94468		#N/A
ZMIZ1	ENSG00000108175	ZMIZ1	-0.315795	0.0929061		12.2548	12.0353	12.2807	11.6029	12.3286	11.9919	12.2366	12.0841	12.3551	12.1913	12.6746	12.3115		#N/A
ETS2	ENSG00000157557	ETS2	0.556484	0.0929061		9.21021	9.62545	8.54097	9.60665	8.83458	9.47494	8.56485	8.36098	8.69917	9.38641	8.91307	9.37868		#N/A
SDCCAG8	ENSG00000276111	SDCCAG8	-0.377818	0.0929061		8.71059	8.41568	8.49602	8.07633	8.53052	7.8249	8.47041	8.07494	8.46663	7.95892	8.10377	8.16915		#N/A
CCDC141	ENSG00000163492	CCDC141	2.1171	0.0929061		3.84823	4.41659	3.75714	6.10356	2.91018	4.24336	2	2.52735	3.19475	4.58241	2.8573	4.51081		#N/A
PTPRD-AS1	ENSG00000225706	PTPRD-AS1	-0.741369	0.0929061		5.61697	4.65611	4.74688	4.32195	4.83894	4.34327	5.4182	3.86697	5.19597	5.21966	5.22024	4.82969		#N/A
PIGV	ENSG00000060642	PIGV	-0.419539	0.0929092		6.80078	6.60779	7.2072	6.75999	7.50006	6.91651	6.9962	6.79167	7.34094	6.73402	6.81713	6.54363		#N/A
DPH3	ENSG00000154813	DPH3	0.410623	0.0929578		8.91786	8.99772	8.36467	8.99195	8.66577	9.05985	8.5038	8.96577	8.63201	8.97424	8.05176	8.70255		#N/A
BBS2	ENSG00000125124	BBS2	-0.260552	0.0933288		9.13805	8.91368	9.49754	9.13568	9.39536	9.08532	9.40645	9.0784	9.35812	9.18018	9.44028	9.29048		#N/A
HPS3	ENSG00000163755	HPS3	-0.444367	0.0933892		8.63291	7.9313	8.98503	8.40618	9.46163	8.7452	8.84805	8.60614	8.73744	8.66939	8.86617	8.51142		#N/A
CIITA	ENSG00000179583	CIITA	1.06936	0.0933892		4.93469	5.04121	3.6518	5.04234	3.11927	5.24619	3.10674	4.60281	4.71937	4.66039	4.90558	5.24168		#N/A
PURB	ENSG00000146676	PURB	0.288712	0.0933982		9.46267	9.87842	9.73688	10.2013	9.90963	10.1033	9.90702	10.3031	9.62786	9.92571	9.99232	9.99968		#N/A
DENND2C	ENSG00000175984	DENND2C	1.47417	0.0933982		6.21926	7.20625	4.26557	6.50555	3.60958	5.56869	4.08067	5.23025	5.29403	5.90403	4.33864	4.25082		#N/A
GABPB1	ENSG00000104064	GABPB1	0.348216	0.0936183		8.935	9.09505	8.96318	9.23934	8.72692	8.92526	8.82475	9.15187	8.39109	8.83407	8.4996	9.17559		#N/A
EZR	ENSG00000092820	EZR	0.752348	0.0941137		13.2035	13.5814	12.8123	13.9749	12.5475	13.3329	11.9243	12.5905	13.2051	13.795	12.1817	13.0473		EZR
CDKN2AIP	ENSG00000168564	CDKN2AIP	0.318738	0.0941137		8.33024	8.61333	8.45355	8.78326	8.37618	8.82945	8.60301	9.00843	8.22285	8.12626	8.23781	8.67295		#N/A
MRPL47	ENSG00000136522	MRPL47	0.267964	0.0941137		8.53741	8.87568	8.38946	8.83953	8.40141	8.57581	8.49645	8.61266	8.31137	8.52053	8.48005	8.73155		#N/A
C14orf93	ENSG00000100802	C14ORF93	-0.688823	0.0941137		6.52108	6.10022	7.38207	6.8196	7.26737	6.05476	7.33815	6.92339	7.26237	6.4782	7.73196	7.05272		#N/A
TMEM33	ENSG00000109133	TMEM33	0.228552	0.0941349		9.79286	9.81497	9.41945	9.90949	9.73803	9.80787	9.58867	9.8906	9.5752	9.76072	9.62956	9.92911		#N/A
GARS1-DT	ENSG00000196295	GARS1-DT	-0.407292	0.0942341		8.49644	8.30567	8.52614	8.37341	8.59754	8.24221	8.64019	7.98231	9.10023	8.71121	9.24376	8.63253		#N/A
PPP2R5D	ENSG00000112640	PPP2R5D	-0.354603	0.0942341		9.08377	9.02468	9.10961	8.52135	9.24459	8.88438	9.27722	8.82968	8.90457	8.49947	8.84085	8.51883		#N/A
LNX2	ENSG00000139517	LNX2	0.374604	0.0942508		8.84358	9.28095	8.96867	9.7463	8.92434	9.21627	9.05495	9.18068	8.91488	9.10896	8.54105	8.86258		#N/A
ZNF655	ENSG00000197343	ZNF655	0.349035	0.0942561		10.4431	10.6891	10.6868	11.1739	10.4111	10.7826	10.2155	10.5717	10.573	10.8897	10.4395	10.7197		#N/A
KDM3B	ENSG00000120733	KDM3B	-0.239237	0.0943976		11.4356	11.3495	11.8784	11.5768	11.7139	11.4246	11.9029	11.6643	11.5695	11.4113	11.8123	11.4734		#N/A
STAT1	ENSG00000115415	STAT1	0.403603	0.0943976		10.4645	10.5632	10.1619	10.8811	9.92363	10.3424	10.062	10.1366	10.5409	11.0395	10.2332	10.7181		#N/A
ZBTB40	ENSG00000184677	ZBTB40	-0.260535	0.0943976		10.5415	10.4751	10.6607	10.0888	10.1886	10.2441	10.5666	10.2508	10.6044	10.3053	10.6355	10.3106		#N/A
FNBP1	ENSG00000187239	FNBP1	-0.302003	0.0943976		9.76054	9.55876	10.0536	9.66874	9.76161	9.48864	9.56952	9.22603	9.83208	9.46456	9.77565	9.54764		#N/A
ANGEL1	ENSG00000013523	ANGEL1	-0.380161	0.0943976		8.57725	8.29685	8.88107	8.48499	8.84197	8.35423	9.07977	8.75207	8.65987	8.19338	9.04971	8.71551		#N/A
FAM133B	ENSG00000234545	FAM133B	0.259343	0.0943976		8.63291	8.76492	8.84269	9.04077	8.7779	9.06717	8.93767	9.07605	8.37624	8.7563	8.66451	9.06602		#N/A
CEP44	ENSG00000164118	CEP44	-0.422166	0.0943976		7.73608	7.05754	8.05436	7.39071	8.05859	7.73578	8.12419	7.94146	7.72769	7.38933	8.11225	7.72597		#N/A
TRAPPC5	ENSG00000181029	TRAPPC5	-0.902372	0.0943976		5.03981	4.71026	5.95603	4.82688	5.15599	4.43671	5.59387	4.24819	5.12669	4.11312	5.84722	5.44212		#N/A
IGFL4	ENSG00000204869	IGFL4	1.44521	0.0943976		3.10823	4.20661	3.41478	5.04234	2.66556	3.75566	3.10674	3.68095	3.44293	4.41255	4.55334	5.37835		#N/A
PIBF1	ENSG00000083535	PIBF1	-0.402511	0.0944228		7.98673	7.635	8.27882	7.64251	7.97366	7.14134	8.20311	7.8725	8.0371	7.97427	8.11225	7.8428		#N/A
ZNF35	ENSG00000281306	ZNF35	0.348824	0.0944916		7.93316	7.99812	7.59596	8.07633	7.56403	7.78991	7.55898	8.09371	7.71594	7.91982	7.31311	7.86624		#N/A
MIDEAS	ENSG00000156030	MIDEAS	-0.294026	0.0944959		9.31341	9.11776	9.75448	9.32753	9.61186	9.09968	9.49214	9.2986	9.60416	9.51265	9.56301	9.22402		#N/A
PARP16	ENSG00000138617	PARP16	-0.741374	0.0946438		6.64289	5.83373	7.55272	6.61052	7.50938	6.54904	7.93041	7.10083	7.00683	6.43448	7.64688	7.25268		#N/A
ZMYM3	ENSG00000147130	ZMYM3	-0.410142	0.0947981		10.5132	10.1412	10.7213	10.2918	11.0355	10.5291	11.1305	10.8425	10.5418	10.1501	11.027	10.5573		#N/A
RASSF3	ENSG00000153179	RASSF3	0.542173	0.0947981		8.99178	9.05899	8.33944	9.38455	8.5577	9.17619	8.16651	8.42165	8.27981	8.91583	8.27609	8.84205		#N/A
UCKL1-AS1	ENSG00000280213	UCKL1-AS1	0.802191	0.0947981		4.33496	5.44407	4.26557	5.20016	3.74189	4.89749	4.80707	5.35992	4.57079	4.66039	4.44998	4.73103		#N/A
POT1	ENSG00000128513	POT1	-0.322807	0.0955973		8.3457	7.98171	8.62687	8.21226	8.62779	7.97262	8.61664	8.42165	8.29962	8.15348	8.58441	8.38732		#N/A
RPL23AP64	ENSG00000281913	RPL23AP64	0.921317	0.0960235		4.87912	5.16269	5.57885	6.56481	4.58076	5.8993	4.98577	5.08776	5.09076	6.21949	5.4519	6.32428		#N/A
BORA	ENSG00000136122	BORA	-0.524436	0.0963101		6.98318	6.53466	7.89037	6.89542	7.22278	6.78054	7.7255	7.35529	7.50691	7.21941	7.42636	6.92464		#N/A
ENSG00000280187	ENSG00000280187	ENSG00000280187	-0.593333	0.0963101		5.47423	5.12332	6.37548	5.5907	6.04735	5.02333	6.21213	5.5621	5.83997	5.27027	5.86742	5.82358		#N/A
RTKN	ENSG00000114993	RTKN	0.623429	0.0963544		10.403	10.8264	9.42346	10.4233	9.62048	10.5475	9.35044	9.89595	9.86436	10.1851	9.373	9.81331		#N/A
LIPE	ENSG00000079435	LIPE	-0.893988	0.0963544		5.39718	5.23834	6.47148	5.47189	6.89351	6.29828	7.11622	6.3041	6.65975	5.69761	7.32046	6.16333		#N/A
C17orf58	ENSG00000186665	C17ORF58	-0.422635	0.0963544		6.6261	6.37622	6.56148	6.18136	6.85018	6.34724	6.97519	6.15126	6.47698	6.58203	6.86814	6.37417		#N/A
BIVM	ENSG00000134897	BIVM	-0.586681	0.0966472		7.2141	6.37622	7.70531	6.89542	8.08374	7.33582	7.86909	7.2421	7.57351	7.65044	7.70976	7.02175		#N/A
MRPS31	ENSG00000102738	MRPS31	-0.278169	0.0970055		8.67023	8.1961	8.79091	8.41587	8.58878	8.14172	8.61664	8.46193	8.45608	8.40636	8.676	8.49272		#N/A
ZDBF2	ENSG00000283649	ZDBF2	0.292942	0.0970187		8.70661	9.0874	9.08705	9.30685	8.99897	9.01889	9.09202	9.54348	8.98507	9.30681	8.89351	9.20576		#N/A
CCDC191	ENSG00000163617	CCDC191	-0.369835	0.0970187		7.40328	7.48777	7.8373	7.41667	7.98706	7.05557	7.84613	7.64333	7.50008	7.21941	7.60539	7.093		#N/A
PKD2	ENSG00000118762	PKD2	0.513732	0.0974597		10.5459	10.667	11.0418	11.7419	10.5382	11.098	10.6124	11.1571	11.0237	11.4281	10.8556	11.4715		#N/A
BAG5	ENSG00000166170	BAG5	0.380847	0.098314		9.73142	10.0653	9.35589	9.92088	9.31798	9.56306	9.31534	9.67546	9.26446	9.72487	9.18663	9.45987		#N/A
GNPNAT1	ENSG00000100522	GNPNAT1	0.307494	0.098314		9.01453	9.20756	8.96042	9.48	9.21359	9.47494	8.78606	9.13611	8.97278	9.04135	8.74858	9.1896		#N/A
PITPNB	ENSG00000180957	PITPNB	0.294101	0.098404		10.5626	10.763	10.3066	10.7	10.251	10.6511	10.1254	10.3211	10.3337	10.4888	10.1552	10.5582		#N/A
HFE	ENSG00000010704	HFE	-0.726858	0.098404		5.54736	4.54132	6.10315	5.07531	6.0727	5.34592	6.02035	5.80918	5.88263	5.62168	5.36932	4.32034		#N/A
DIS3	ENSG00000083520	DIS3	0.287346	0.0984306		10.3023	10.5089	10.1425	10.5004	9.80951	10.1263	9.94399	10.179	9.99645	10.3219	10.0695	10.3402		#N/A
ACBD5	ENSG00000107897	ACBD5	-0.395396	0.098642		8.83265	8.39516	8.84866	8.24886	8.89977	8.20285	8.75866	8.62883	8.41671	8.65041	8.76752	7.97263		#N/A
RBBP6	ENSG00000122257	RBBP6	-0.243968	0.0986481		10.9783	10.8945	11.2078	10.8088	11.2325	10.8752	11.199	11.1566	11.136	10.8918	10.9721	10.6025		#N/A
HUNK	ENSG00000142149	HUNK	0.581936	0.0987398		10.3272	10.7191	10.3399	11.8075	10.9696	11.668	11.103	11.5021	10.5657	10.787	11.1288	11.5092		#N/A
FGF11	ENSG00000283903	FGF11	-0.919266	0.0987916		4.93469	4.28005	4.89273	3.87449	4.35142	3.23767	3.99975	3.57809	4.85407	3.9977	4.27957	4.01957		#N/A
ALG5	ENSG00000120697	ALG5	0.295235	0.0989011		7.65567	7.80014	7.85521	7.9968	7.53696	7.94903	7.52324	7.90474	7.41546	7.83829	7.73196	7.99937		#N/A
PGBD1	ENSG00000137338	PGBD1	0.338142	0.0990172		7.85609	8.15276	7.47765	8.0011	7.57294	8.12778	7.97342	8.20144	7.64339	7.80435	7.7209	7.97263		#N/A
TRIM11	ENSG00000154370	TRIM11	0.313654	0.0991273		8.99178	9.35717	9.17523	9.62487	9.11637	9.44994	8.90748	9.10639	9.23184	9.21935	8.98878	9.48657		#N/A
EEF1D	ENSG00000273594	EEF1D	0.351194	0.0991492		9.64033	10.1704	9.50889	9.78544	9.32854	9.9314	9.30064	9.77182	9.58975	9.68345	10.0553	10.1788		#N/A
LZTS3	ENSG00000088899	LZTS3	-0.665373	0.0991492		8.56409	8.39929	9.45902	8.44139	9.7241	8.71753	9.20462	8.77841	9.4881	8.7563	9.91195	9.43265		#N/A
DTNBP1	ENSG00000047579	DTNBP1	-0.36676	0.0991492		8.14826	7.99267	8.14934	7.25337	7.96014	7.66996	7.99446	7.75364	7.92424	7.78707	8.01602	7.51237		#N/A
ENSG00000234338	ENSG00000234338	ENSG00000234338	-0.998686	0.0991492		4.87912	4.4803	5.76717	4.78762	6.09761	5.34592	5.99969	5.42063	5.65551	4.80473	6.93665	5.53278		#N/A
SOX8	ENSG00000005513	SOX8	1.4101	0.0991492		5.39718	6.39287	2.96503	5.04234	5.6014	6.93264	5.70013	6.67191	4.0028	5.41226	4.27957	6.0451		#N/A
TMEM208	ENSG00000168701	TMEM208	0.453826	0.0991796		7.69644	7.95392	7.26192	7.80861	7.01617	7.75405	6.85383	7.50298	7.58	7.60186	7.04702	7.54903		#N/A
TMEM62	ENSG00000137842	TMEM62	0.492188	0.0992864		7.68027	7.7876	7.84329	8.39643	7.37318	7.90882	7.19102	7.75364	7.76806	7.91982	7.22975	8.2246		#N/A
ARL5B	ENSG00000165997	ARL5B	0.236254	0.0992904		10.6325	10.8125	10.8028	11.2463	11.1268	11.1948	10.9666	11.2468	10.8499	11.1322	10.8113	10.9829		#N/A
NFATC4	ENSG00000285485	NFATC4	-0.667588	0.0992904		9.227	8.8152	10.0419	9.53141	10.292	9.43303	10.5745	10.06	10.1733	9.29769	10.5623	9.83574		#N/A
ZNF544	ENSG00000198131	ZNF544	0.393202	0.0992904		8.87233	9.18383	9.12445	9.26993	8.32962	9.01889	8.72129	9.27001	8.75189	9.1228	9.07815	9.44632		#N/A
TMEM68	ENSG00000167904	TMEM68	-0.417744	0.0992904		8.95529	8.49878	8.45746	8.14784	8.92434	8.07789	8.32852	8.28137	8.39109	8.04138	8.54105	8.13096		#N/A
TMEM37	ENSG00000171227	TMEM37	-0.81464	0.0993125		4.87912	4.41659	6.61852	5.42149	6.77496	5.29691	6.28224	5.26377	5.6799	5.73413	5.55512	5.16816		#N/A
POLM	ENSG00000122678	POLM	-0.328693	0.0993534		7.81225	7.43248	8.03354	7.51009	7.51863	7.45228	7.68078	7.59805	7.91399	7.41205	7.99322	7.65374		#N/A
SCAMP1	ENSG00000085365	SCAMP1	-0.285778	0.0994743		9.32125	9.18861	9.39313	9.08192	9.84121	9.4044	9.61777	9.35995	9.28249	9.14332	9.48672	9.08861		#N/A
RC3H1	ENSG00000135870	RC3H1	0.372764	0.0995555		9.41949	9.69758	9.42745	9.90377	9.21644	9.53428	9.00659	9.52458	9.24416	9.48613	8.90333	9.30127		#N/A
AFG3L1P	ENSG00000223959	AFG3L1P	0.37917	0.0995555		8.56409	8.91368	8.89845	9.11005	8.45541	9.13844	8.95118	9.28845	8.72577	9.00071	9.00711	9.43657		#N/A
PSMA2	ENSG00000106588	PSMA2	0.679484	0.0998865		5.31579	5.5066	5.68945	5.70047	5.66944	6.16809	4.75871	6.16906	5.55361	6.36632	5.60409	6.45367		#N/A
NBR1	ENSG00000188554	NBR1	-0.395284	0.0999938		10.6209	10.4425	10.913	10.3686	10.536	9.81223	10.6675	10.5146	10.3725	10.0193	10.5238	10.0076		#N/A
SAPCD2	ENSG00000186193	SAPCD2	-0.76384	0.100347		6.52108	6.30763	7.97469	6.91377	7.71655	7.15516	7.78103	7.08216	7.69216	6.58203	8.17437	7.51977		#N/A
MKI67	ENSG00000148773	MKI67	-0.489408	0.100361		11.7899	11.581	12.721	11.999	12.9129	12.4525	12.9213	12.423	12.5185	12.0915	12.769	12.2127		#N/A
FAM110C	ENSG00000184731	FAM110C	0.512439	0.100367		7.68837	7.91986	7.23482	8.61404	8.03943	8.52884	7.54479	8.16198	7.95953	8.0915	8.06494	8.31678		#N/A
GPR75	ENSG00000119737	GPR75	0.653052	0.10053		6.17379	6.64996	5.06675	6.31161	5.15599	5.68751	6.04071	6.33597	5.49983	6.21949	5.78487	6.30726		#N/A
MTMR10	ENSG00000277086	MTMR10	0.427469	0.10085		9.14691	9.27423	9.21968	9.71656	8.72293	9.10325	8.78606	9.29455	9.29833	9.62631	9.30982	9.92911		#N/A
KBTBD7	ENSG00000120696	KBTBD7	-0.497812	0.101176		6.9963	6.48892	7.74427	7.33052	8.16848	7.41832	8.07072	7.64333	7.40818	6.87151	7.6758	7.36387		#N/A
BTBD19	ENSG00000222009	BTBD19	0.981048	0.101282		9.27355	9.91202	7.49298	8.90749	7.87625	9.29636	7.40252	8.35322	8.73162	9.1228	7.07335	8.32103		#N/A
DLG1	ENSG00000075711	DLG1	-0.299613	0.101286		10.7505	10.506	10.7164	10.3127	10.6561	10.3812	10.4572	10.1241	10.7719	10.6092	10.5151	10.113		DLG1
KBTBD2	ENSG00000170852	KBTBD2	0.325658	0.101384		9.62774	10.0271	9.28279	9.82112	9.80574	9.82956	9.73646	10.0883	9.43715	9.89782	9.46368	9.64908		#N/A
TIGAR	ENSG00000078237	TIGAR	0.557399	0.101741		7.75936	8.28798	6.60447	7.42948	7.23406	7.51789	6.51841	7.25048	7.61837	7.98945	6.90768	7.55625		#N/A
CBX7	ENSG00000100307	CBX7	-0.716269	0.101741		5.61697	5.5066	6.86231	5.96965	6.52242	6.02498	6.84227	6.07776	6.85446	5.93574	7.0992	6.46906		#N/A
PNISR	ENSG00000132424	PNISR	-0.417668	0.101753		12.0148	11.7533	12.5807	12.2729	12.5868	12.0261	12.6785	12.315	12.6285	12.139	12.8399	12.3616		#N/A
TADA2B	ENSG00000173011	TADA2B	0.261421	0.102008		8.361	8.63798	8.30511	8.54508	8.37618	8.51283	8.36532	8.65433	8.15488	8.44543	8.02053	8.31678		#N/A
CALM2	ENSG00000143933	CALM2	0.252227	0.102051		11.8109	12.0564	11.5449	11.8542	11.7114	11.8382	11.5046	11.7694	11.6677	11.9128	11.4041	11.7408		#N/A
NOL4L	ENSG00000197183	NOL4L	-0.413576	0.102096		10.1195	9.71755	10.3335	9.73215	10.7997	10.4667	10.7785	10.3565	9.91018	9.76514	9.99002	9.34154		#N/A
TBC1D10A	ENSG00000099992	TBC1D10A	0.605575	0.102768		7.08495	7.58517	5.99961	7.02767	6.38752	6.9002	5.84614	6.32012	6.55816	6.95123	6.32724	6.83246		#N/A
ATE1	ENSG00000107669	ATE1	-0.293574	0.102805		8.52388	8.25192	8.66459	8.2011	8.98568	8.32397	8.56132	8.45469	8.44545	8.31288	8.47018	8.38327		#N/A
ULBP1	ENSG00000111981	ULBP1	1.4578	0.102806		4.76109	4.59986	3.53815	4.42788	3.60958	5.19362	3.62126	4.97082	3.65462	4.73436	2	5.09069		#N/A
GOLGA2P7	ENSG00000225151	GOLGA2P7	-0.750046	0.102844		5.83712	5.5956	5.39521	4.61893	5.7023	3.75566	5.95746	5.26377	6.0788	5.62168	5.65146	5.24168		#N/A
SETD5	ENSG00000168137	SETD5	-0.153047	0.102981		11.7699	11.6146	11.867	11.7267	11.9287	11.7992	11.9731	11.761	11.8122	11.6318	11.9044	11.8028		#N/A
UNC5C	ENSG00000182168	UNC5C	-0.736147	0.103008		9.62774	8.79342	11.4704	10.3753	10.9729	10.4444	10.9632	10.3825	10.9098	10.1602	10.8949	10.2651		#N/A
P3H2	ENSG00000090530	P3H2	0.535898	0.103008		9.42435	9.59339	8.83369	9.50291	8.9382	9.50221	9.38669	10.0189	10.0241	10.5021	9.40617	10.0427		#N/A
PIGG	ENSG00000174227	PIGG	0.264978	0.103008		9.86795	10.0782	9.54979	9.8296	9.26398	9.57081	9.30906	9.62475	9.59136	9.78485	9.71145	9.97967		#N/A
CSPP1	ENSG00000104218	CSPP1	0.367094	0.103008		9.12915	9.47914	8.88689	9.28411	8.64056	9.10325	8.61325	8.97845	8.76904	9.38641	8.90577	8.84205		#N/A
TDP1	ENSG00000042088	TDP1	-0.33101	0.103008		9.05271	8.83666	8.9796	8.73248	9.25847	8.54467	9.02715	8.72524	8.60997	8.72489	9.03192	8.43903		#N/A
LINC01089	ENSG00000212694	LINC01089	-0.557595	0.103008		7.50776	7.04706	8.04399	7.17186	7.21141	7.32364	8.20311	7.47463	7.82931	7.35456	8.26851	7.64021		#N/A
NRSN2-AS1	ENSG00000225377	NRSN2-AS1	-0.483271	0.103008		5.71546	5.88171	6.5321	5.5206	6.30435	5.68751	6.41298	5.87574	6.09703	5.73413	6.05522	5.77488		#N/A
TRIM23	ENSG00000113595	TRIM23	0.345874	0.103171		7.56171	7.93699	7.39028	7.71754	7.42331	7.85906	7.62791	8.02693	7.2297	7.78707	7.80708	7.80085		#N/A
THAP11	ENSG00000168286	THAP11	-0.392444	0.103281		7.07261	6.76954	7.34875	7.07735	7.65075	7.38354	7.62791	7.09152	7.10916	6.98193	7.64102	6.95774		#N/A
JAG1	ENSG00000101384	JAG1	0.880218	0.103583		10.2526	10.994	8.1445	9.77042	9.55002	10.7892	9.58	10.1975	9.75669	10.353	9.00483	9.60448		#N/A
KIDINS220	ENSG00000134313	KIDINS220	-0.241986	0.103588		11.2413	11.0344	11.2563	11.0114	11.1162	10.8177	11.1819	10.8842	11.264	11.1365	11.0376	10.7429		#N/A
SH3BGRL2	ENSG00000198478	SH3BGRL2	0.292659	0.103588		10.1195	10.1801	10.343	10.7	10.2173	10.3885	9.9721	10.3565	10.1625	10.5769	10.0264	10.3631		#N/A
TERT	ENSG00000164362	TERT	-1.71473	0.104121		3.45087	2.31157	3.75714	2.96525	4.07861	3.23767	4.89918	3.57809	5.32529	2.99847	5.78487	4.5691		#N/A
ATRX	ENSG00000085224	ATRX	-0.151686	0.104563		11.3346	11.3977	11.6118	11.4051	11.5566	11.3597	11.5678	11.4162	11.5285	11.3633	11.5159	11.2726		#N/A
ATAD2B	ENSG00000119778	ATAD2B	-0.395305	0.104591		8.73036	8.17218	9.2448	8.78575	9.20788	8.94527	9.52323	9.13385	9.05899	8.89178	9.19464	8.64274		#N/A
CCDC157	ENSG00000187860	CCDC157	0.650443	0.104755		4.82131	6.03807	5.18475	5.25876	4.64976	5.34592	5.28795	5.85389	4.85407	5.36647	5.25131	5.67226		#N/A
ITPRID2	ENSG00000138434	ITPRID2	1.00342	0.104766		12.9889	13.5491	11.0148	12.7031	11.4446	12.6732	10.6675	11.2268	12.0339	12.8521	10.8701	12.0696		#N/A
SPAG9	ENSG00000008294	SPAG9	0.617732	0.104766		10.8074	11.2496	9.84239	10.7872	10.0614	10.9701	9.99837	10.3478	10.1418	10.5956	9.63693	10.2203		#N/A
HLTF	ENSG00000071794	HLTF	-0.618347	0.104766		8.7956	8.25648	9.19646	8.46957	9.66282	8.91312	9.86195	9.33059	9.25435	8.80002	9.80736	9.12792		#N/A
YEATS2	ENSG00000163872	YEATS2	-0.240485	0.104956		10.3643	10.2062	10.6053	10.2097	10.5428	10.2949	10.5596	10.2612	10.2557	10.1501	10.6318	10.4126		#N/A
ENSG00000254428	ENSG00000254428	ENSG00000254428	0.698606	0.104979		6.02809	6.17914	5.74173	6.39234	5.56613	6.54904	4.94313	6.4127	6.39096	6.36632	5.15601	6.23709		#N/A
ANKLE2	ENSG00000176915	ANKLE2	0.533754	0.105519		11.3112	11.6665	10.4292	11.282	10.4345	11.1299	10.1665	10.4749	10.7512	11.1892	10.4761	10.951		#N/A
ARL11	ENSG00000152213	ARL11	-1.37168	0.105724		4.15945	4.34994	5.29381	3.63007	4.83894	2.74768	4.15728	2.52735	5.12669	3.73482	4.27957	4.51081		#N/A
NHLH2	ENSG00000177551	NHLH2	-1.3319	0.10602		4.06298	2.56766	4.19232	3.44059	5.76585	4.83021	4.85386	3.77696	5.19597	4.11312	4.90558	3.84184		#N/A
ID2	ENSG00000115738	ID2	-0.757793	0.10609		9.37999	9.07455	11.3243	9.89686	11.0217	9.84243	11.298	10.6138	10.3269	10.1365	10.8912	10.1682		#N/A
MSRB2	ENSG00000148450	MSRB2	-0.265342	0.10609		7.93316	7.54848	7.81917	7.37092	7.78717	7.40682	7.66118	7.48887	7.72769	7.66942	7.68151	7.56344		#N/A
NIFK-AS1	ENSG00000236859	NIFK-AS1	-0.72551	0.10609		5.58259	5.5066	6.42427	5.76253	5.66944	4.60719	6.39727	5.69092	5.96432	5.0562	6.41219	5.64542		#N/A
RN7SL381P	ENSG00000263968	RN7SL381P	-1.29355	0.106223		4.49141	2.78507	5.57885	3.53844	5.05785	3.01338	4.94313	4.75202	5.09076	4.41255	5.50443	4.73103		#N/A
ETV6	ENSG00000139083	ETV6	0.511573	0.106514		9.84274	10.0338	9.22198	9.92992	9.17021	10.0303	8.90193	9.07132	9.30619	9.59687	9.21449	9.93605		#N/A
UBE2A	ENSG00000077721	UBE2A	0.330731	0.106514		9.76247	10.1325	9.57161	10.029	9.48778	9.76347	9.34431	9.64397	9.59136	9.89782	9.38705	9.60448		#N/A
MAFB	ENSG00000204103	MAFB	-0.806883	0.106514		6.53913	6.85614	7.49298	6.70837	8.25407	6.93264	8.1098	7.10083	7.30219	6.75194	6.78563	5.09069		#N/A
AKAP12	ENSG00000131016	AKAP12	0.648738	0.106859		15.4301	15.7698	14.4948	15.79	15.3192	16.0518	14.6637	15.0988	14.7871	15.2324	14.3861	15.1157		#N/A
ZSWIM4	ENSG00000288360	ZSWIM4	0.698625	0.106859		8.24487	8.27905	7.10114	8.61964	7.16502	8.14865	7.65458	8.40672	7.14464	7.31894	7.47982	8.19251		#N/A
MCMBP	ENSG00000197771	MCMBP	0.229455	0.106861		9.93421	10.1704	10.1242	10.3636	10.2454	10.4709	10.3003	10.5634	10.0984	10.3763	10.2611	10.4037		#N/A
GPBP1	ENSG00000062194	GPBP1	0.315938	0.106886		10.52	10.48	10.8893	11.3117	10.8362	11.1576	11.0053	11.2193	10.691	11.0809	10.6385	11.1425		#N/A
MAPKAPK2	ENSG00000162889	MAPKAPK2	0.542074	0.106886		10.8835	11.1137	9.81825	10.6219	9.97663	10.6015	9.84323	10.4478	10.2093	10.6962	9.69177	10.3202		#N/A
ANAPC1	ENSG00000153107	ANAPC1	-0.258138	0.106886		9.53413	9.46346	9.90963	9.49531	9.7241	9.46665	9.89028	9.55706	9.80045	9.56174	9.93366	9.73273		#N/A
PLAC9	ENSG00000189129	PLAC9	0.817717	0.107125		3.72754	4.90855	4.89273	5.86037	4.26609	5.79729	4.70867	5.19592	5.12669	5.1672	4.74018	5.20539		#N/A
KIF2C	ENSG00000142945	KIF2C	-0.507933	0.107381		8.87943	8.54421	9.68108	8.93245	9.92711	9.38402	9.9561	9.39441	9.2584	8.80002	9.74732	9.35195		#N/A
YJU2	ENSG00000105248	YJU2	0.368212	0.107381		7.37342	7.83711	7.77595	7.76379	7.40347	8.20285	7.7255	7.80008	7.34094	7.58196	7.49288	8.06666		#N/A
DLX2-DT	ENSG00000236651	DLX2-DT	1.10148	0.107699		3.59583	4.20661	4.74688	5.04234	3.11927	4.24336	3.62126	5.16076	3.55266	5.11277	4.21798	4.73103		#N/A
RASSF4	ENSG00000107551	RASSF4	-0.336766	0.107927		8.7956	8.4034	8.50739	7.96196	8.43601	8.30551	8.29075	7.82276	8.71106	8.3249	8.30229	8.24708		#N/A
TSSK6	ENSG00000178093	TSSK6	-0.674429	0.107927		4.82131	4.71026	5.10716	4.42788	5.05785	4.43671	5.35454	4.60281	4.57079	4.21999	5.08878	4.17778		#N/A
MARK2	ENSG00000072518	MARK2	-0.251632	0.107985		10.0707	10.0231	10.1702	9.79661	10.2384	9.85518	9.96279	9.67546	9.91275	9.70201	10.0026	9.79053		#N/A
MAP2K6	ENSG00000108984	MAP2K6	-0.75429	0.108171		8.15413	7.29751	8.93819	7.95754	8.45058	7.61104	9.35451	8.86014	8.77754	8.07023	9.18863	8.40343		#N/A
LYSMD3	ENSG00000176018	LYSMD3	0.404259	0.108638		8.55525	8.73259	8.11507	8.61123	8.42621	8.64597	8.46665	8.89533	8.05119	8.82139	7.94652	8.26923		#N/A
MEX3D	ENSG00000181588	MEX3D	0.222378	0.10876		9.32645	9.80412	9.94071	10.0447	9.85406	10.0926	9.65623	9.93029	9.56868	9.66229	9.58604	9.7533		#N/A
RFX1	ENSG00000288283	RFX1	0.302302	0.10876		7.72824	8.05677	7.96922	8.17091	8.02651	8.41289	7.90286	8.33756	7.94451	7.80435	7.45334	8.036		#N/A
GNG4	ENSG00000282972	GNG4	1.06296	0.108953		6.64289	6.59346	4.84573	6.98492	6.71182	7.93308	6.89915	7.54449	6.60985	7.79573	5.05395	6.84431		#N/A
LRRK2	ENSG00000188906	LRRK2	-1.13123	0.108956		4.98821	4.71026	8.46914	7.01922	7.50006	6.34724	7.05746	5.87574	7.2297	6.21949	7.00206	6.14428		#N/A
SUB1	ENSG00000113387	SUB1	0.203943	0.109266		10.8037	10.8776	10.8392	11.0901	10.9294	10.9123	10.7891	11.0271	10.5073	10.8466	10.6804	11.016		#N/A
PNRC1	ENSG00000146278	PNRC1	-0.454036	0.109266		9.04642	9.08995	9.71253	9.10207	9.40787	8.40135	9.42011	8.63525	9.21941	9.05946	9.04307	8.76933		#N/A
TMEM69	ENSG00000159596	TMEM69	-0.296907	0.110361		8.85803	8.49107	9.059	8.73248	8.69463	8.37208	8.5927	8.47272	8.75763	8.58193	8.87866	8.43512		#N/A
FAM189B	ENSG00000262666	FAM189B	-0.440614	0.110606		9.24635	9.01664	9.21738	8.74278	9.78096	9.40151	9.82279	9.52285	9.47423	9.00071	9.67468	8.89996		#N/A
TRIP6	ENSG00000087077	TRIP6	0.355846	0.110819		9.83546	9.92782	9.87494	10.3695	9.34684	9.99998	9.53405	9.89995	9.86036	9.9178	9.7514	10.2032		#N/A
GVQW3	ENSG00000179240	GVQW3	-0.880741	0.110994		6.64289	6.05909	7.57451	6.88616	7.62527	7.11331	8.51476	7.58485	7.86165	6.99703	8.50605	7.33056		#N/A
SEPSECS-AS1	ENSG00000281501	SEPSECS-AS1	-0.91918	0.110994		4.49141	3.42622	5.25837	3.71623	4.26609	4.24336	4.60306	4.10755	4.28307	4.31948	4.50258	3.40316		#N/A
CEMIP2	ENSG00000135048	CEMIP2	0.611838	0.111094		12.0217	12.2728	11.8537	12.6829	11.394	12.1211	10.8943	11.4153	11.87	12.3545	11.3305	12.1511		#N/A
CRCP	ENSG00000241258	CRCP	0.237782	0.111101		8.71853	8.96469	8.58456	8.75046	8.57997	8.8635	8.47416	8.88728	8.60042	8.58693	8.57215	8.85088		#N/A
PRXL2C	ENSG00000158122	PRXL2C	0.731264	0.111101		6.88784	6.66375	6.08303	7.19455	5.96851	7.14134	5.95746	6.59497	6.31513	6.98193	5.28173	6.39043		#N/A
SAMD13	ENSG00000203943	SAMD13	-1.04108	0.111419		4.06298	3.14098	5.10716	4.37589	5.00615	3.60277	3.99975	4.03173	4.34539	3.73482	5.05395	3.93344		#N/A
HOMEZ	ENSG00000215271	HOMEZ	-0.328217	0.112288		8.72643	8.50645	8.94657	8.75046	8.81217	8.37798	8.75558	8.20144	8.7081	8.30076	8.92276	8.70255		#N/A
CBLC	ENSG00000142273	CBLC	-0.553662	0.112288		6.50281	6.39287	6.83851	6.5414	6.90766	5.72504	6.39727	5.76303	6.82195	6.05601	6.98367	6.61454		#N/A
ENSG00000235560	ENSG00000235560	ENSG00000235560	-0.966951	0.112288		4.33496	3.86855	5.14648	3.63007	5.24787	3.89388	5.10662	4.60281	4.89632	4.41255	5.62797	4.96609		#N/A
SLC25A25	ENSG00000148339	SLC25A25	0.399144	0.112303		6.80078	7.27073	6.67338	7.11748	7.15319	7.41832	6.78305	7.6241	7.21309	7.31894	7.0292	7.27035		#N/A
C10orf88B	ENSG00000255624	C10ORF88B	-1.25227	0.112303		3.45087	2.97397	4.46533	4.14686	5.10775	3.89388	5.62118	3.77696	3.65462	2.99847	4.98167	4.10084		#N/A
HEATR5A	ENSG00000129493	HEATR5A	-0.368811	0.11236		7.78982	7.39164	7.51567	7.26055	7.62527	6.99541	7.47914	7.12839	7.7041	7.58196	7.40579	6.93576		#N/A
RCCD1	ENSG00000166965	RCCD1	-0.519951	0.112421		7.49857	7.65585	8.25653	7.68586	8.31907	7.6408	8.13843	7.10083	8.15922	7.75188	8.48986	8.04115		#N/A
SLC22A15	ENSG00000163393	SLC22A15	-0.445075	0.112555		6.53913	6.10022	6.45591	6.00431	6.42736	6.16809	6.10015	6.05878	6.85446	6.21949	6.41219	5.77488		#N/A
NARS2	ENSG00000137513	NARS2	-0.280698	0.112789		8.02564	7.64893	7.86113	7.75364	8.08996	7.77209	7.92494	7.4457	8.14177	7.86324	8.078	7.96179		#N/A
DDX21	ENSG00000165732	DDX21	0.376613	0.113068		11.4789	11.8488	10.9531	11.4596	11.0846	11.3273	10.8502	11.2948	10.9296	11.1116	11.0885	11.5626		#N/A
ZNF121	ENSG00000197961	ZNF121	-0.295025	0.113235		9.56748	9.26973	9.62825	9.46608	9.67942	9.24884	9.56426	9.49489	9.49843	9.10199	9.91316	9.49599		#N/A
TRIM46	ENSG00000163462	TRIM46	-1.01522	0.113403		7.97352	7.23424	6.25475	5.20016	7.08007	5.76161	7.71286	6.39768	6.7661	6.21949	6.55602	5.82358		#N/A
DOC2GP	ENSG00000231793	DOC2GP	-1.36748	0.113485		2.90062	3.29064	6.77721	4.97403	6.1221	5.13906	6.51841	4.79852	6.15036	5.11277	5.84722	4.78121		#N/A
ENSG00000212978	ENSG00000212978	ENSG00000212978	-0.600527	0.113719		6.46556	6.51957	6.54687	5.5206	6.85018	5.86609	6.17576	6.00031	6.2351	5.45665	6.53091	5.84733		#N/A
CNOT1	ENSG00000125107	CNOT1	-0.159705	0.113759		12.0887	12.0373	12.1902	11.9479	12.1503	11.9519	12.0781	11.9084	11.9711	11.8054	12.0115	11.8739		#N/A
ZKSCAN7	ENSG00000281894	ZKSCAN7	-0.374234	0.113759		7.35317	7.10883	7.93033	7.52806	7.68403	7.39522	7.6937	7.41619	7.73934	7.08449	7.90315	7.57771		#N/A
JHY	ENSG00000109944	JHY	-0.499836	0.113759		6.38804	6.69093	7.60305	6.75999	7.4622	6.81575	7.49399	6.98499	7.11811	6.90393	7.00206	6.0451		#N/A
POM121C	ENSG00000272391	POM121C	0.341768	0.11434		9.72157	9.92353	9.90103	10.3893	10.1096	10.509	10.1349	10.6507	9.82253	9.97614	10.148	10.4136		#N/A
AVL9	ENSG00000105778	AVL9	-0.211201	0.114882		10.0282	9.93067	9.99152	9.65108	10.2201	9.77917	10.028	9.8484	9.98059	9.95888	10.0219	9.84167		#N/A
MAMSTR	ENSG00000176909	MAMSTR	-0.987558	0.114882		4.4153	4.04746	4.52621	3.33562	4.89685	3.43174	5.35454	4.37633	4.21794	3.58292	4.55334	4.25082		#N/A
LINC01963	ENSG00000260804	LINC01963	0.259472	0.115015		7.75164	8.08265	7.75066	7.75364	7.58179	8.09949	7.58	7.80579	7.76236	7.94341	7.80708	8.08675		#N/A
CLIP1	ENSG00000130779	CLIP1	0.413666	0.115161		11.5226	11.7776	11.3984	12.0802	11.1261	11.5754	10.9137	11.3054	11.3401	11.6226	11.1104	11.472		#N/A
TMEM43	ENSG00000170876	TMEM43	0.663582	0.115161		10.0892	10.4935	9.04347	10.1711	9.1072	9.98652	9.07484	9.60527	9.18148	9.72033	8.8561	9.31836		#N/A
EVC	ENSG00000072840	EVC	-0.298808	0.115161		9.5183	9.56429	9.46681	8.86097	9.53414	9.05985	9.43942	9.14063	9.37315	9.22257	9.46202	9.11085		#N/A
PARPBP	ENSG00000185480	PARPBP	-0.46838	0.115161		7.35317	6.84408	7.8008	7.47344	8.08996	7.65058	8.04575	7.52389	7.91399	7.40073	8.12069	7.68702		#N/A
ZNF786	ENSG00000197362	ZNF786	0.393404	0.115161		7.95348	8.12313	7.44648	8.12045	7.26737	7.87584	7.88607	8.16198	7.41546	7.93559	7.7807	7.93987		#N/A
NUP37	ENSG00000075188	NUP37	-0.250834	0.115161		8.02564	7.72323	8.23845	7.76379	8.16259	7.85059	8.09527	7.92584	7.82931	7.86324	8.09094	7.85457		#N/A
C22orf46	ENSG00000184208	C22ORF46	-0.431276	0.115259		8.80309	8.37015	9.21968	8.60277	8.99234	8.28052	9.36464	8.74021	9.06594	8.74292	9.06728	9.1133		#N/A
ZSCAN5A	ENSG00000131848	ZSCAN5A	0.524541	0.115347		5.22954	6.23561	5.68945	6.29771	5.91345	6.44043	6.50381	6.59497	5.49983	6.24503	5.80595	6.02442		#N/A
SYVN1	ENSG00000162298	SYVN1	0.266513	0.115473		9.36236	9.55507	9.04866	9.37796	9.00885	9.48317	9.12816	9.45554	9.19635	9.19336	9.0207	9.27743		#N/A
PMM2	ENSG00000140650	PMM2	0.557807	0.115473		8.47317	8.64842	7.66527	8.42229	7.61668	8.07789	7.03733	8.01714	8.09719	8.35453	7.33503	8.22005		#N/A
PI4K2A	ENSG00000155252	PI4K2A	0.599848	0.115562		9.28429	9.67904	8.76273	9.59248	8.57555	9.24884	8.09039	8.92968	8.92257	9.2129	8.23781	8.845		#N/A
CEBPD	ENSG00000221869	CEBPD	1.54734	0.115562		7.15682	7.66958	6.32497	8.29158	5.20266	7.37175	3.25356	5.73939	6.26765	6.71587	4.60237	7.1322		#N/A
NAA80	ENSG00000243477	NAA80	-0.689708	0.115569		7.2141	7.21564	6.92017	6.16613	7.26737	6.41769	7.28792	5.83171	7.09109	6.82147	6.77498	5.77488		#N/A
TJAP1	ENSG00000137221	TJAP1	0.319865	0.115578		9.21302	9.33795	9.25833	9.64697	9.18772	9.84882	9.54478	9.87847	9.52054	9.47269	9.30242	9.75487		TJAP1
CRACD	ENSG00000109265	CRACD	-0.34875	0.115611		9.65901	9.3358	9.71416	9.09605	9.67529	9.25847	9.86481	9.71083	9.49327	9.01191	9.70726	9.5128		#N/A
MRNIP	ENSG00000283918	MRNIP	0.27406	0.115611		8.86877	9.16457	8.6164	9.06355	8.42621	8.82513	8.88513	8.99851	8.7081	8.89984	8.8306	9.02496		#N/A
TSNAX	ENSG00000116918	TSNAX	0.291762	0.116002		8.25036	8.29242	8.13475	8.35674	8.13277	8.29931	7.93041	8.36485	8.06977	8.17357	7.86348	8.59093		#N/A
DYNLL1	ENSG00000088986	DYNLL1	0.308401	0.116029		11.4957	11.6936	11.2165	11.6316	11.3205	11.6735	11.204	11.5183	11.2949	11.5393	10.9156	11.2616		#N/A
NPC1	ENSG00000141458	NPC1	0.79532	0.116029		10.4562	10.834	9.17523	10.6699	9.24459	10.5184	9.02715	9.33256	9.71894	10.0359	9.0252	9.8298		#N/A
ATP6V0A2	ENSG00000185344	ATP6V0A2	0.355207	0.116029		8.85082	9.0874	8.38124	9.04494	8.73488	9.04509	8.99097	9.30062	8.7916	9.10896	9.12714	9.44632		#N/A
FASTKD5	ENSG00000215251	FASTKD5	0.294717	0.116238		7.95348	8.39516	8.30511	8.48806	8.30844	8.40135	7.83451	8.30572	7.98911	8.43992	8.05176	8.19251		#N/A
RPGRIP1L	ENSG00000103494	RPGRIP1L	-0.300211	0.116531		8.39607	7.97066	8.62339	8.32966	8.83828	8.2551	8.81591	8.66378	8.18075	8.21937	8.53791	8.15969		#N/A
HDAC11	ENSG00000163517	HDAC11	-0.387484	0.116531		7.16846	7.17771	7.24391	6.97622	7.60804	7.20912	7.60757	7.03439	7.68615	7.18024	7.24527	6.79632		#N/A
SLC9A3R1	ENSG00000109062	SLC9A3R1	-0.344127	0.116584		9.31078	9.16699	9.53875	8.94589	9.55678	9.05617	9.73802	9.50719	9.19212	8.85079	9.53171	9.22402		#N/A
RNF144B	ENSG00000137393	RNF144B	-0.763209	0.116584		6.59194	6.25395	7.08099	6.13519	6.30435	5.08235	6.56134	4.92963	6.26765	6.3894	6.46616	5.87069		#N/A
ZNF746	ENSG00000181220	ZNF746	0.23475	0.116764		8.8363	8.89918	8.77845	9.09806	8.72293	9.19971	8.80405	8.82688	8.75763	9.02302	8.64416	8.88283		#N/A
TLCD4	ENSG00000152078	TLCD4	0.632319	0.116766		8.17735	8.38687	8.2964	9.19126	8.85663	9.56823	8.06576	8.90598	9.06363	9.46998	8.50927	9.19192		#N/A
SLC26A2	ENSG00000155850	SLC26A2	-0.367399	0.116804		8.08825	7.81257	8.3479	8.4477	8.89267	7.9648	8.70224	8.21436	8.365	7.99698	8.39217	8.17385		#N/A
UAP1	ENSG00000117143	UAP1	0.398397	0.117377		9.01453	9.07713	8.23845	9.07175	8.42621	8.92122	8.39331	8.81844	8.24754	8.76073	8.67027	8.77243		#N/A
RHPN1	ENSG00000158106	RHPN1	-0.413209	0.117377		8.47317	8.24277	8.39762	7.96636	8.86028	8.46373	9.04994	8.63204	8.86789	8.28238	8.52207	8.16915		#N/A
RGMA	ENSG00000182175	RGMA	-0.641588	0.117377		7.68837	7.72323	7.75066	6.69782	8.05859	7.78103	8.11461	7.52389	8.00367	6.91987	7.6758	6.43812		#N/A
PCDHA2	ENSG00000204969	PCDHA2	-0.549061	0.117377		6.00231	5.90511	6.48687	5.70047	6.23868	5.13906	6.56134	6.23816	6.1328	5.69761	6.49241	5.93859		#N/A
SF1	ENSG00000168066	SF1	0.338381	0.117616		11.8611	12.1453	12.2152	12.5238	12.2168	12.694	12.4088	12.8075	12.1233	12.2893	12.3506	12.7182		#N/A
ENSG00000287385	ENSG00000287385	ENSG00000287385	-0.98608	0.118013		3.9596	3.55015	4.74688	3.79753	4.07861	4.24336	5.06745	3.77696	3.74986	3.22064	4.74018	3.63911		#N/A
NUDT6	ENSG00000170917	NUDT6	-0.7261	0.118168		5.80766	5.23834	6.14257	5.63561	6.14618	5.72504	6.93223	6.32012	6.60985	5.80451	6.97439	5.98214		#N/A
CEP192	ENSG00000101639	CEP192	-0.371165	0.118193		9.61291	9.16941	9.97796	9.66062	9.83566	9.32719	9.84323	9.48604	9.71747	9.43713	10.1573	9.81632		#N/A
SRPK2	ENSG00000135250	SRPK2	-0.238285	0.118193		9.52284	9.32717	9.61079	9.24479	9.88301	9.4611	9.64796	9.62475	9.50527	9.25748	9.5784	9.3969		#N/A
C2CD2	ENSG00000157617	C2CD2	-0.41695	0.118193		8.18883	7.89085	8.86053	8.47576	9.08868	8.33615	8.5927	8.31774	8.28777	8.2258	8.90821	8.32526		#N/A
BPNT1	ENSG00000162813	BPNT1	-0.248334	0.118193		8.39111	8.10303	8.22015	8.00538	8.08996	7.85059	8.0407	7.70565	8.35746	8.02673	8.16216	8.08176		#N/A
ZNF696	ENSG00000185730	ZNF696	0.367602	0.11867		7.29064	7.62094	7.14061	7.67514	7.16502	7.31135	7.26213	7.81712	7.09109	7.1125	7.24527	7.66046		#N/A
CRNKL1	ENSG00000101343	CRNKL1	0.304916	0.118956		9.07143	9.19099	9.10463	9.68486	8.99897	9.13496	9.31115	9.62475	9.08661	9.43158	9.00938	9.27306		#N/A
DMTF1	ENSG00000135164	DMTF1	0.233132	0.11964		10.8862	11.0096	10.9758	11.2833	10.8996	11.2466	11.0705	11.2183	11.126	11.3611	11.1424	11.3717		#N/A
CDPF1	ENSG00000205643	CDPF1	-0.485817	0.11964		6.36799	6.05909	6.60447	5.86037	7.04207	6.52796	6.93223	6.35165	6.7887	6.14007	6.23698	6.30726		#N/A
ENSG00000227741	ENSG00000227741	ENSG00000227741	1.17431	0.11964		2.65801	4.34994	3.6518	4.20762	2.66556	4.02002	3.38682	4.75202	3.65462	4.58241	4.39538	4.38666		#N/A
KCNE3	ENSG00000175538	KCNE3	-0.992558	0.11964		4.49141	4.20661	4.33527	2.81715	4.58076	4.02002	4.70867	3.77696	4.07814	3.41312	4.82525	4.01957		#N/A
KPNA2	ENSG00000182481	KPNA2	-0.172955	0.119746		11.7454	11.6102	11.7701	11.6739	11.8798	11.7195	11.784	11.5795	11.6612	11.4509	11.5941	11.3541		#N/A
TFDP2	ENSG00000114126	TFDP2	-0.373275	0.119746		10.1869	9.93067	10.7	10.0827	10.2087	9.76121	10.5996	10.3652	9.97444	9.91183	10.5191	9.93881		#N/A
CCNYL1	ENSG00000163249	CCNYL1	0.793033	0.119746		9.41949	9.61307	8.58097	9.89225	8.41634	9.53163	8.00486	8.43275	8.52501	9.1159	7.85844	8.97464		#N/A
MTF1	ENSG00000188786	MTF1	0.213929	0.119746		8.11857	8.44391	8.27882	8.67716	8.3401	8.45259	8.40121	8.51858	8.12854	8.2762	8.16624	8.29967		#N/A
CAPS	ENSG00000105519	CAPS	-0.527878	0.119746		6.69209	5.88171	6.44018	6.26949	6.42736	6.02498	5.93587	5.61502	6.97762	5.90403	6.42587	6.20068		#N/A
ENSG00000285331	ENSG00000285331	ENSG00000285331	-0.949176	0.119746		5.27331	4.28005	4.64076	3.53844	3.86308	3.60277	4.94313	3.46734	4.34539	4.49998	4.50258	4.01957		#N/A
MAILR	ENSG00000253320	MAILR	-0.469456	0.119932		5.71546	5.53688	5.99961	5.22976	5.94124	5.24619	5.95746	5.5621	6.15036	5.66014	5.82673	5.7499		#N/A
CHD1	ENSG00000153922	CHD1	0.276612	0.120558		10.7221	10.7993	10.7295	11.1801	10.7106	10.8918	10.8306	11.0985	10.52	10.9818	10.9622	11.1751		#N/A
ANKFY1	ENSG00000185722	ANKFY1	-0.252418	0.120973		10.4739	10.2594	10.8043	10.4581	10.6655	10.2425	10.5987	10.4441	10.6645	10.4618	10.7936	10.6164		#N/A
HAT1	ENSG00000128708	HAT1	0.240538	0.121139		9.44842	9.53083	9.66594	10.1442	9.74593	9.88864	9.82132	10.1138	9.52391	9.67878	9.62808	9.88103		#N/A
AKIRIN2	ENSG00000135334	AKIRIN2	-0.21678	0.121275		9.57842	9.55322	10.0235	9.63596	10.0439	9.79027	10.0781	9.83592	9.46373	9.43436	9.78231	9.44438		#N/A
FBXL20	ENSG00000108306	FBXL20	-0.42081	0.121275		8.61601	8.30127	8.91561	8.10855	8.75851	8.12076	8.85094	8.986	8.74324	8.1802	8.56907	8.06666		#N/A
FAM234B	ENSG00000084444	FAM234B	-0.519027	0.121381		7.81225	6.98252	7.8008	7.17186	7.98038	7.15516	8.09039	8.11223	7.54724	7.09856	8.02053	7.45169		#N/A
ROCK2	ENSG00000134318	ROCK2	0.168652	0.121478		10.5714	10.6916	10.4243	10.6268	10.5002	10.699	10.4042	10.5163	10.4771	10.6928	10.3871	10.5447		ROCK2
CEP126	ENSG00000110318	CEP126	-0.611337	0.121478		5.89431	5.80913	6.9538	6.11946	6.97643	5.8321	7.20913	6.60808	6.60985	6.31902	6.94618	6.43812		#N/A
ZBTB7A	ENSG00000178951	ZBTB7A	0.448493	0.121662		9.05271	9.78059	9.24027	9.67144	9.03488	9.44151	8.54716	8.91656	9.12265	9.45912	8.87866	9.2172		#N/A
PSMC3IP	ENSG00000131470	PSMC3IP	0.477175	0.121709		7.2474	7.60674	7.32324	7.80861	7.45257	8.12778	7.98398	8.37639	7.01644	7.40073	7.52502	8.036		#N/A
PTRH2	ENSG00000141378	PTRH2	0.339956	0.121736		8.15997	8.59905	7.8008	8.31248	8.22044	8.34823	7.70011	8.30169	7.99398	8.08444	7.99781	8.2246		#N/A
TTLL5	ENSG00000119685	TTLL5	-0.215746	0.121749		9.42192	9.11023	9.35589	9.07583	9.44231	9.21627	9.3966	9.33651	9.39541	9.00819	9.39751	9.33735		#N/A
TBC1D24	ENSG00000162065	TBC1D24	-0.483491	0.121768		7.53499	7.1968	7.08099	6.71885	7.77177	7.46342	7.99446	7.18199	7.43708	6.96666	7.62924	7.16091		#N/A
LINC02814	ENSG00000236975	LINC02814	1.23444	0.121768		3.84823	4.34994	3.6518	4.57349	3.74189	4.68542	2.54738	3.21651	3.44293	4.11312	3.01047	4.51081		#N/A
PRPF40B	ENSG00000110844	PRPF40B	-0.476462	0.121969		7.22528	6.93783	7.67202	7.28895	7.81748	7.48546	7.99446	7.69954	7.82931	7.08449	8.13742	7.4671		#N/A
FPGT	ENSG00000254685	FPGT	-0.333984	0.121969		6.94309	6.34233	7.16953	6.78014	6.83545	6.61049	7.0066	6.82575	6.7198	6.62155	6.84795	6.4065		#N/A
ENSG00000225216	ENSG00000225216	ENSG00000225216	-0.890468	0.121969		4.63254	3.66427	4.11516	3.33562	3.86308	3.60277	3.72559	3.21651	5.12669	4.11312	4.44998	4.17778		#N/A
FAM72A	ENSG00000196550	FAM72A	-0.619094	0.122041		5.74685	5.88171	6.16188	5.47189	6.14618	5.60939	6.73387	5.95997	5.86146	5.76975	6.55602	5.16816		#N/A
SRR	ENSG00000167720	SRR	-0.400685	0.122444		7.22528	6.45761	7.01879	6.35254	6.90766	6.9002	6.91026	6.68435	6.62249	6.3894	6.90768	6.51427		#N/A
RARA-AS1	ENSG00000265666	RARA-AS1	-0.535927	0.122444		5.47423	5.04121	5.95603	4.82688	6.09761	5.60939	5.93587	5.45006	5.49983	5.36647	5.53	5.27708		#N/A
KIF4A	ENSG00000090889	KIF4A	-0.317368	0.122735		9.12915	8.97854	9.87201	9.17234	9.59227	9.3957	9.94534	9.62314	9.31594	9.11936	9.53012	9.22175		#N/A
CBR4	ENSG00000145439	CBR4	-0.3058	0.122735		9.55866	9.14012	9.62652	9.19689	9.55902	9.23265	9.9866	9.59048	9.41371	9.36036	9.57687	9.37664		#N/A
CYP24A1	ENSG00000019186	CYP24A1	1.29216	0.12296		11.3462	11.6345	10.5867	12.7336	10.8673	12.61	8.37738	9.64397	11.9695	12.5107	10.6013	12.0221		#N/A
WDR43	ENSG00000163811	WDR43	0.198016	0.12296		10.1883	10.356	10.0288	10.2482	10.1593	10.1541	10.0682	10.2767	9.89854	10.1901	10.063	10.36		#N/A
GEMIN6	ENSG00000152147	GEMIN6	-0.427361	0.12296		7.78226	7.20625	7.92469	7.42948	7.50938	6.9002	7.79309	7.45299	7.40086	6.95123	7.76463	7.60582		#N/A
EVC2	ENSG00000173040	EVC2	-0.375591	0.12296		7.68837	7.58517	7.34875	6.91377	7.50006	6.8837	7.68078	6.84802	7.47242	7.23223	7.61139	7.58479		#N/A
CENPI	ENSG00000102384	CENPI	-0.271024	0.123334		7.53499	7.08853	7.72492	7.46102	7.55506	7.45228	7.82279	7.46024	7.44422	7.31894	7.64102	7.37208		#N/A
FAM102B	ENSG00000162636	FAM102B	-0.403332	0.123437		8.11256	8.22428	8.58097	8.0011	8.89622	8.38386	8.50013	8.03666	8.57463	8.35453	8.46356	7.73236		#N/A
ENSG00000260922	ENSG00000260922	ENSG00000260922	1.13454	0.123702		3.9596	3.96078	4.98236	5.78263	4.64976	5.34592	4.15728	5.5888	5.4152	6.34286	4.82525	6.43812		#N/A
PAWR	ENSG00000177425	PAWR	0.447118	0.124508		11.085	11.1901	10.9116	11.6949	10.8044	11.1052	10.4439	10.7051	11.0923	11.7175	11.0281	11.4493		#N/A
CTNNAL1	ENSG00000119326	CTNNAL1	0.325754	0.124658		10.2797	10.3194	10.1377	10.8817	10.1173	10.416	9.99837	10.3141	9.99281	10.3279	10.3025	10.4663		#N/A
ZNF354C	ENSG00000177932	ZNF354C	-0.316665	0.124757		7.98673	7.4955	8.2339	7.84253	8.18019	7.69854	8.25197	8.17084	8.16355	8.01193	8.05176	7.70663		#N/A
BUB3	ENSG00000154473	BUB3	-0.220527	0.125564		9.98116	9.99752	10.1143	9.75141	10.1696	9.95923	10.2876	10.0671	10.0501	9.84453	10.2224	9.88677		#N/A
TRPS1	ENSG00000104447	TRPS1	0.348565	0.125583		8.40101	8.49107	8.28323	8.96361	8.60625	8.78127	8.92402	8.99102	8.21035	8.78704	7.98862	8.54084		#N/A
SDAD1	ENSG00000198301	SDAD1	0.225439	0.125953		9.62351	9.91635	9.46681	9.65654	9.45683	9.60392	9.54656	9.71841	9.33718	9.6384	9.40444	9.63209		#N/A
GAREM1	ENSG00000141441	GAREM1	-0.359302	0.126115		6.87369	6.23561	6.85046	6.5414	6.89351	6.29828	6.66993	6.52757	6.49083	6.58203	6.78563	6.29003		#N/A
GSKIP	ENSG00000100744	GSKIP	0.262237	0.126154		8.41573	8.61688	8.30945	8.66096	8.32962	8.53413	8.0855	8.30572	8.25972	8.73393	8.3711	8.45457		#N/A
ENSG00000259959	ENSG00000259959	ENSG00000259959	0.429795	0.126154		7.1093	7.30632	6.99745	7.885	7.35263	7.71728	7.26213	7.74179	6.83287	7.38933	7.60539	7.71955		#N/A
PKP2	ENSG00000057294	PKP2	0.494125	0.126372		11.304	11.2952	11.625	12.2446	10.9805	11.537	10.9525	11.6787	11.5994	11.9443	11.362	12.0044		#N/A
TTLL7	ENSG00000137941	TTLL7	-0.697885	0.126372		8.92474	8.68606	10.4695	9.69152	10.3644	9.52633	9.65623	9.21964	10.3095	9.74066	10.4157	9.42676		#N/A
GTF3C4	ENSG00000125484	GTF3C4	0.189226	0.126372		9.82079	9.87101	9.86466	10.0571	9.89193	10.1403	10.0757	10.2725	9.716	9.95695	9.82037	10.022		#N/A
LARP1B	ENSG00000138709	LARP1B	0.432949	0.126372		8.52388	8.96747	8.44569	8.93245	8.83087	9.12797	8.05579	8.648	8.65064	8.97805	8.08664	8.60144		#N/A
POLL	ENSG00000166169	POLL	-0.348058	0.126372		8.20021	7.89085	8.62687	8.07633	8.06492	8.00349	8.02033	7.95692	8.35746	7.85497	8.52843	8.05141		#N/A
KLHL32	ENSG00000186231	KLHL32	-1.02198	0.126372		4.63254	4.54132	7.67202	6.2407	7.8024	6.52796	8.15721	7.16434	6.77744	6.27011	6.93665	5.72448		#N/A
GRAMD1C	ENSG00000178075	GRAMD1C	-0.815814	0.126372		6.88784	6.66375	7.77595	6.96746	6.79032	5.60939	7.07731	6.45685	6.53161	6.41212	8.05617	6.58659		#N/A
RNF152	ENSG00000176641	RNF152	0.668035	0.126372		7.57926	7.81874	6.16188	7.81838	6.86477	7.44105	6.24761	6.63396	6.64744	7.36625	7.22975	7.51237		#N/A
ENSG00000263345	ENSG00000263345	ENSG00000263345	-0.540545	0.126372		5.97606	5.47567	5.71583	5.63561	6.14618	5.68751	5.77498	5.35992	5.6307	4.87182	6.23698	5.41058		#N/A
FAM13C	ENSG00000148541	FAM13C	-0.974315	0.126372		5.77758	5.23834	4.89273	4.20762	5.7023	4.02002	4.75871	4.43637	5.12669	4.41255	4.82525	3.52595		#N/A
MATN1-AS1	ENSG00000186056	MATN1-AS1	-1.34165	0.126372		4.69825	2.56766	3.41478	4.14686	3.74189	3.01338	4.29929	2.91269	4.93736	3.41312	5.08878	3.74403		#N/A
ENSG00000251414	ENSG00000251414	ENSG00000251414	0.70576	0.126372		4.4153	4.4803	4.40176	5.25876	4.1754	5.24619	4.42857	4.88724	4.46249	4.66039	4.60237	5.37835		#N/A
PKNOX1	ENSG00000160199	PKNOX1	0.466448	0.126617		8.48252	8.76172	9.07182	9.64834	9.03488	9.36928	9.31951	9.54518	8.7199	9.28851	9.09966	9.789		#N/A
VIPAS39	ENSG00000151445	VIPAS39	-0.335296	0.126617		8.82164	8.67589	9.09963	8.41587	8.86028	8.29307	8.9295	8.58308	8.38739	8.54643	8.82028	8.43512		#N/A
KIAA2026	ENSG00000183354	KIAA2026	0.172377	0.128191		9.33938	9.52706	9.60903	9.85712	9.58348	9.64855	9.48658	9.69248	9.36189	9.59438	9.37476	9.45021		#N/A
ZFP14	ENSG00000142065	ZFP14	-0.654104	0.128191		6.9963	7.07828	8.23845	7.27482	8.31376	7.42973	8.55426	7.96713	7.9744	7.24495	8.47018	7.86624		#N/A
CNN2	ENSG00000064666	CNN2	0.360038	0.128857		12.5553	12.682	11.9144	12.3384	11.7498	12.2417	11.5938	12.0553	12.1217	12.2796	11.8521	12.4097		#N/A
ARF6	ENSG00000165527	ARF6	0.431895	0.129415		10.9767	11.1607	10.6884	11.4336	10.6286	11.0294	10.3306	10.5809	10.4884	10.9627	10.3589	10.8452		#N/A
MPHOSPH10	ENSG00000124383	MPHOSPH10	0.24908	0.129415		9.64658	9.81033	9.85728	10.0928	9.53186	9.75895	9.81246	10.0742	9.39541	9.73617	9.58604	9.84314		#N/A
TRPV4	ENSG00000111199	TRPV4	-0.612331	0.129415		6.30612	5.75864	6.42427	5.39561	6.85018	6.66943	6.63016	5.66606	6.2351	5.73413	6.62882	6.14428		#N/A
RDH5	ENSG00000135437	RDH5	-1.24407	0.129415		3.2897	3.14098	4.11516	2.65209	4.1754	3.23767	3.72559	3.86697	4.81056	3.58292	4.74018	3.40316		#N/A
SLC25A42	ENSG00000181035	SLC25A42	-0.735891	0.129491		5.71546	5.62408	6.51718	5.42149	7.00305	6.7626	6.94309	6.33597	6.09703	5.41226	6.97439	5.5902		#N/A
ENSG00000249406	ENSG00000249406	ENSG00000249406	1.01606	0.12953		4.82131	5.04121	4.93824	6.18136	5.10775	5.5268	4.48911	5.23025	4.34539	5.31917	5.57982	6.89076		#N/A
NAP1L5	ENSG00000177432	NAP1L5	0.687317	0.129623		5.43622	5.67942	7.03983	7.41667	6.46614	7.37175	6.69584	7.46024	6.26765	6.83835	6.34175	7.27035		#N/A
F3	ENSG00000117525	F3	0.91795	0.129817		8.98522	9.44561	7.38207	8.54214	7.34225	8.61632	6.28224	7.63695	8.31527	9.01933	7.29085	7.87781		#N/A
CCDC97	ENSG00000142039	CCDC97	0.259102	0.129817		8.80309	9.30973	9.22428	9.41224	9.13755	9.36928	9.35654	9.69402	8.94286	9.21613	9.2046	9.2308		#N/A
ARHGAP29	ENSG00000137962	ARHGAP29	0.763128	0.12995		11.2733	11.3495	11.6598	12.7505	11.0939	11.882	10.6756	11.3318	12.0635	12.6881	11.5937	12.5232		#N/A
RBM7	ENSG00000076053	RBM7	0.46982	0.12995		9.03056	9.28095	8.5988	9.44573	8.71892	9.20636	8.29923	8.648	8.8465	9.2512	8.37463	8.76933		#N/A
PTPN23	ENSG00000076201	PTPN23	0.18978	0.12996		10.3233	10.5316	10.2067	10.4137	10.3772	10.6128	10.2244	10.5189	10.3622	10.3907	10.4554	10.6121		#N/A
ELOA	ENSG00000011007	ELOA	0.261927	0.130535		9.58712	9.8799	9.56438	9.79908	9.24459	9.61396	9.58521	9.77182	9.314	9.61656	9.37476	9.55667		#N/A
NPRL3	ENSG00000103148	NPRL3	-0.347059	0.130761		8.28284	8.04628	8.92412	8.29858	8.7663	8.46927	8.9295	8.54949	8.83297	8.61658	8.6026	8.31678		#N/A
CDS1	ENSG00000163624	CDS1	0.290154	0.13112		10.7052	10.8386	10.6708	11.3328	11.1744	11.0134	11.0105	11.5025	10.6124	10.9395	10.6582	10.9393		#N/A
KLC2	ENSG00000174996	KLC2	0.327986	0.13112		9.66929	9.86506	9.14643	9.7767	9.56573	9.96512	9.46036	9.68012	9.37502	9.48077	9.18461	9.61663		#N/A
AXIN1	ENSG00000103126	AXIN1	0.337967	0.131173		9.31078	9.64816	9.33902	10.0857	9.45923	9.82525	9.25124	9.39631	9.2339	9.36619	9.45203	9.65076		#N/A
GIGYF2	ENSG00000204120	GIGYF2	-0.155854	0.132065		10.5166	10.5022	10.7327	10.4729	10.6893	10.4955	10.5832	10.422	10.5334	10.4523	10.5302	10.3085		#N/A
SELENOS	ENSG00000131871	SELENOS	0.511898	0.132532		9.07143	9.52329	8.34368	9.04286	8.38632	8.79015	8.22553	8.72223	8.45608	8.91979	8.078	8.59795		#N/A
ERI2	ENSG00000196678	ERI2	-0.295261	0.132532		7.75164	7.3999	8.25653	7.76884	8.01348	7.83351	8.19405	7.73583	7.78503	7.87963	8.00694	7.68043		#N/A
GMCL1	ENSG00000087338	GMCL1	-0.336022	0.132734		8.5946	8.46375	8.66797	8.33988	8.91035	8.176	8.98835	8.71012	8.58758	8.51004	8.99339	8.54448		#N/A
ARMCX2	ENSG00000184867	ARMCX2	-0.331447	0.132817		10.2594	9.99888	10.4705	10.1635	10.273	9.71766	10.4343	10.1161	10.095	9.81287	10.57	10.275		#N/A
ARHGEF37	ENSG00000183111	ARHGEF37	-0.715154	0.132817		5.83712	5.83373	5.02517	4.90233	5.15599	4.02002	5.50871	4.31368	5.72748	5.1672	5.88734	4.62512		#N/A
DNAJC3-DT	ENSG00000247400	DNAJC3-DT	-0.663546	0.133196		5.13779	5.62408	5.88807	4.93862	5.99527	5.02333	5.97873	5.08776	5.32529	5.11277	6.20559	5.31163		#N/A
YTHDF3	ENSG00000185728	YTHDF3	0.315923	0.133364		10.7981	11.0626	10.4559	10.7759	10.4222	10.7442	10.4891	10.8473	10.2394	10.608	10.3445	10.6095		#N/A
IL4R	ENSG00000077238	IL4R	0.941885	0.133752		10.2011	10.303	8.26994	10.0353	9.10413	10.4667	8.23881	8.75502	9.12709	9.73842	8.12069	9.71187		#N/A
LRRC3	ENSG00000160233	LRRC3	0.389282	0.133752		7.89864	7.97066	7.12101	7.44218	7.09252	7.89242	7.26213	7.50998	7.31003	8.09852	7.53768	7.60582		#N/A
ENSG00000279289	ENSG00000279289	ENSG00000279289	1.62695	0.133752		2	2.97397	2.77744	4.47807	3.30185	5.08235	3.38682	4.10755	3.92331	4.21999	3.86309	5.27708		#N/A
CMTR2	ENSG00000180917	CMTR2	0.29995	0.133856		8.9885	9.32717	9.40331	9.86303	9.33379	9.36928	9.3299	9.65507	9.06131	9.52834	9.43182	9.57989		#N/A
ARMC7	ENSG00000125449	ARMC7	0.457443	0.133892		6.90185	7.34961	6.64621	7.03607	6.14618	7.07022	7.13529	7.23366	6.55816	7.35456	6.77498	6.93576		#N/A
FAM227B	ENSG00000166262	FAM227B	-0.521428	0.133892		5.61697	5.53688	6.35884	6.10356	5.94124	5.43919	6.22998	5.71536	6.21855	5.66014	6.29778	5.31163		#N/A
BDNF-AS	ENSG00000245573	BDNF-AS	0.613869	0.133892		4.82131	5.83373	5.71583	5.44691	5.29171	6.05476	5.59387	6.20402	4.85407	6.11259	5.62797	5.79944		#N/A
RNF20	ENSG00000155827	RNF20	-0.238495	0.13398		9.57842	9.3824	9.73204	9.52546	9.57019	9.21627	9.90979	9.60363	9.63878	9.43158	9.63399	9.46563		#N/A
RNF208	ENSG00000212864	RNF208	-0.779417	0.134178		5.65055	5.9951	6.08303	5.25876	6.6288	5.56869	6.66993	5.95997	6.31513	5.36647	5.80595	4.25082		#N/A
AKAP8	ENSG00000105127	AKAP8	0.227799	0.134261		9.5806	9.82881	9.62999	9.86539	9.53186	9.65828	9.44898	9.8484	9.46548	9.51528	9.61769	9.87815		#N/A
PUM1	ENSG00000134644	PUM1	-0.121401	0.134804		11.5038	11.4404	11.5362	11.4063	11.5139	11.347	11.5291	11.4407	11.4142	11.3136	11.4949	11.3084		#N/A
HDAC7	ENSG00000061273	HDAC7	0.308405	0.134804		11.0207	11.0878	10.3356	10.8149	10.4296	10.9798	10.3613	10.63	10.7569	10.9068	10.4571	10.8101		#N/A
KRTAP2-3	ENSG00000262862	KRTAP2-3	1.95439	0.134804		4.4153	5.88171	4.58462	6.85801	3.74189	5.79729	2	2.73285	3.74986	4.31948	3.78029	4.87661		#N/A
ASPDH	ENSG00000204653	ASPDH	0.79064	0.134804		4.5637	4.99833	3.41478	4.20762	3.86308	4.136	3.38682	4.43637	4.57079	4.73436	3.78029	4.87661		#N/A
TRIM71	ENSG00000206557	TRIM71	-0.320672	0.135045		10.4104	10.2774	10.5376	10.1957	10.3682	9.72925	10.4295	10.1812	10.3356	10.0809	10.7784	10.4451		#N/A
CCDC174	ENSG00000154781	CCDC174	0.242294	0.135045		8.67023	8.905	8.6544	9.16661	8.57997	8.79898	8.81887	8.91392	8.52501	8.76515	8.68172	8.79092		#N/A
ZNF813	ENSG00000198346	ZNF813	-0.37533	0.135045		8.31461	7.85525	8.41785	8.00966	8.38126	7.59086	8.25633	7.53766	8.01809	8.13994	7.96069	7.95087		#N/A
SHISAL1	ENSG00000138944	SHISAL1	1.37493	0.135045		3.59583	3.29064	3.27987	5.10755	4.43199	5.56869	2.54738	4.79852	2.89481	4.49998	4.08631	4.38666		#N/A
RELA-DT	ENSG00000285533	RELA-DT	-0.591613	0.135045		5.65055	5.04121	5.63521	4.66299	5.10775	4.43671	5.47917	4.79852	5.52697	5.31917	5.08878	5.09069		#N/A
LBX2-AS1	ENSG00000257702	LBX2-AS1	-0.814036	0.135045		5.08963	4.76244	5.02517	3.53844	5.05785	4.136	4.85386	4.31368	5.26208	4.58241	4.27957	4.17778		#N/A
KMT2B	ENSG00000272333	KMT2B	0.206833	0.135077		10.4079	10.642	10.3609	10.678	10.5929	10.8307	10.5979	10.8307	10.3846	10.4495	10.5451	10.6954		#N/A
PPARGC1B	ENSG00000155846	PPARGC1B	-1.03059	0.135229		5.77758	4.54132	4.11516	3.79753	5.10775	3.43174	3.5088	3.07258	5.09076	3.9977	5.12278	5.05034		#N/A
TRIM65	ENSG00000141569	TRIM65	-0.456799	0.135235		8.43994	8.1818	7.59596	7.21689	7.87625	7.46342	7.53764	7.11926	8.10622	7.09856	8.23393	7.83094		#N/A
MOCS3	ENSG00000124217	MOCS3	0.348568	0.135235		7.43253	7.51084	7.38207	7.71754	7.08007	7.31135	7.07731	7.39365	6.89669	7.53098	7.20616	7.64699		#N/A
RAPGEF6	ENSG00000158987	RAPGEF6	0.383513	0.135235		6.28489	6.4256	6.82645	7.18703	6.44688	7.14134	6.58926	6.89157	6.42021	6.83835	6.61694	6.92464		RAPGEF6
CREB1	ENSG00000118260	CREB1	0.225529	0.135365		10.1954	10.4009	10.4549	10.546	10.23	10.3619	10.4525	10.6617	10.0859	10.5756	10.3071	10.5283		#N/A
CCDC93	ENSG00000125633	CCDC93	-0.343963	0.135365		10.5155	10.2203	10.2218	9.84999	10.2771	10.1437	10.699	10.2265	10.2486	9.94726	10.1897	9.70538		#N/A
CEBPG	ENSG00000153879	CEBPG	0.258375	0.135365		9.33164	9.33365	9.15369	9.75523	9.55002	9.78362	9.47727	9.636	9.2705	9.45365	9.34266	9.70213		#N/A
DNAJC2	ENSG00000105821	DNAJC2	0.280034	0.135365		9.32645	9.71424	9.0921	9.45516	9.20502	9.29636	9.27722	9.56381	8.9554	9.27308	9.21449	9.40492		#N/A
SPAST	ENSG00000021574	SPAST	-0.261682	0.135365		9.24085	9.06159	9.238	8.9347	9.32327	9.02642	9.51961	9.28233	9.15997	9.06663	9.2046	8.72835		#N/A
PRECSIT	ENSG00000255874	PRECSIT	1.11408	0.135365		6.34766	5.34487	5.10716	6.8485	5.00615	6.66943	4.42857	5.89727	5.4152	6.24503	3.86309	6.0451		#N/A
IQCH	ENSG00000103599	IQCH	-0.595661	0.135365		4.87912	3.96078	5.42749	5.39561	5.4929	5.19362	5.77498	4.92963	4.76568	3.9977	4.90558	4.45007		#N/A
HSPA2	ENSG00000126803	HSPA2	1.26089	0.135421		6.98318	7.21564	8.63725	10.0205	7.4622	8.48028	6.24761	7.4457	7.36371	8.3189	7.90803	9.58166		#N/A
PACC1	ENSG00000065600	PACC1	-0.351299	0.135421		8.16579	7.83102	8.22474	7.72795	8.53963	8.09232	8.51112	8.18404	7.83475	8.00448	8.39565	7.80085		#N/A
EEFSEC	ENSG00000284869	EEFSEC	-0.375633	0.135421		7.33263	7.06795	7.51567	7.18703	8.11458	7.53912	7.82279	7.53079	7.63717	7.24495	7.7209	7.42827		#N/A
ZNF292	ENSG00000188994	ZNF292	0.279828	0.135543		9.97786	10.2853	9.92242	10.1577	9.84305	9.97294	10.1929	10.3281	9.95833	10.47	9.79818	10.1409		#N/A
SUDS3	ENSG00000111707	SUDS3	-0.223052	0.135609		10.9541	10.7116	10.9552	10.7391	10.9466	10.6165	10.7315	10.6364	10.8384	10.5844	10.6237	10.4353		#N/A
BACH1	ENSG00000156273	BACH1	0.320146	0.135609		9.56087	9.84554	9.93511	10.3477	9.86679	10.1489	9.65623	9.95871	9.72628	9.84035	9.87875	10.3402		#N/A
PIMREG	ENSG00000129195	PIMREG	-0.64242	0.135609		7.25833	7.11888	7.91903	6.70837	8.3401	7.59086	8.37337	7.88333	7.92933	7.1125	8.31338	7.81898		#N/A
ENSG00000226535	ENSG00000226535	ENSG00000226535	1.33061	0.135609		6.12684	6.54958	6.48687	7.8135	5.15599	6.29828	3.82288	4.88724	5.19597	6.3894	5.05395	7.26154		#N/A
ENSG00000247796	ENSG00000247796	ENSG00000247796	-0.913515	0.135609		3.9596	4.12923	4.6948	3.33562	4.77859	3.60277	4.23003	3.77696	4.07814	3.87224	4.90558	3.93344		#N/A
SNX11	ENSG00000002919	SNX11	0.356134	0.135619		7.14509	7.66273	7.03983	7.38414	7.23406	7.46342	7.23587	7.80579	7.13585	7.25754	6.93665	7.14183		#N/A
GLT8D1	ENSG00000016864	GLT8D1	-0.223021	0.135779		9.50688	9.30314	9.2695	9.0697	9.43255	9.22939	9.41622	9.30465	9.30619	9.0985	9.43859	9.01974		#N/A
C3orf38	ENSG00000179021	C3ORF38	0.297651	0.13615		8.95193	9.15728	8.88398	9.42349	8.97564	9.08893	8.90471	9.23451	8.64446	9.00071	8.52207	8.71228		#N/A
PDXK	ENSG00000160209	PDXK	0.374721	0.137065		9.9444	10.2571	9.26057	9.98411	9.51809	10.0322	9.22033	9.42807	9.71157	9.79353	9.57072	9.89391		#N/A
TOR1AIP2	ENSG00000169905	TOR1AIP2	0.357222	0.137405		10.0298	10.0601	9.7937	10.3273	9.51346	9.87826	9.45468	9.82753	9.62942	10.0576	9.44028	9.86221		#N/A
C12orf29	ENSG00000133641	C12ORF29	0.25754	0.137405		8.10652	8.54048	7.98557	8.38989	8.01348	8.24221	8.12895	8.38403	8.02763	8.13312	8.27986	8.34207		#N/A
ECD	ENSG00000122882	ECD	0.299664	0.13752		9.32645	9.49078	9.09461	9.43307	8.85663	9.24884	8.83936	9.08311	9.05433	9.41199	8.86366	9.15671		#N/A
ST6GAL1	ENSG00000073849	ST6GAL1	-0.469329	0.137569		9.81894	9.24243	9.0172	8.40618	9.59008	9.14884	9.46036	9.04263	9.36001	8.85079	9.88372	9.56386		#N/A
CFAP53	ENSG00000172361	CFAP53	-0.814216	0.137576		5.71546	4.86147	5.32841	5.13909	5.15599	4.52446	5.21813	4.37633	5.29403	3.73482	4.60237	4.17778		#N/A
ASB3	ENSG00000115239	ASB3	-0.330645	0.137784		9.03375	8.67589	9.7158	9.29114	9.4712	8.77681	9.35654	9.23028	9.24006	9.13992	9.15821	8.83315		#N/A
AHDC1	ENSG00000126705	AHDC1	-0.302168	0.138277		10.6378	10.3313	11.1086	10.774	10.7356	10.5475	10.7951	10.4623	10.6645	10.3676	11.0163	10.6814		#N/A
ZBTB21	ENSG00000173276	ZBTB21	0.560881	0.138277		8.16579	8.55164	8.11507	9.15123	8.73885	8.38386	8.73386	9.1087	7.48631	8.30683	8.13326	9.12306		#N/A
ENSG00000229167	ENSG00000229167	ENSG00000229167	0.651216	0.138277		5.54736	6.05909	4.64076	6.16613	5.37558	5.29691	4.60306	5.08776	5.6307	6.11259	5.84722	6.3411		#N/A
CRIM1	ENSG00000277354	CRIM1	0.655922	0.138473		10.7485	11.0935	10.8519	11.6648	10.3372	10.871	9.68077	10.4062	10.8929	11.5179	10.0553	10.9544		#N/A
DDX42	ENSG00000198231	DDX42	0.186729	0.138473		11.7135	11.8404	11.8226	12.0235	11.5572	11.8014	11.662	11.7636	11.6554	11.8235	11.6755	11.9472		#N/A
MX1	ENSG00000157601	MX1	0.872403	0.138473		6.36799	7.13876	6.97579	7.78886	6.92168	8.3602	7.3867	7.64333	8.21453	8.9932	7.73196	8.73791		#N/A
CRYZL1	ENSG00000205758	CRYZL1	-0.250328	0.138473		8.42547	8.19135	8.6407	8.50631	8.63206	8.39554	8.68617	8.51858	8.69619	8.50477	8.63536	8.11148		#N/A
APOBEC3D	ENSG00000243811	APOBEC3D	-1.39661	0.138473		4.15945	4.20661	4.33527	2.96525	5.20266	2.42174	3.99975	2.73285	3.74986	4.31948	4.44998	3.40316		#N/A
FRMD4B	ENSG00000114541	FRMD4B	0.60596	0.138474		10.171	10.0859	10.4801	11.4284	11.0282	11.4218	10.4955	11.4059	11.0081	11.1843	10.4827	11.5849		#N/A
TAOK3	ENSG00000135090	TAOK3	-0.289517	0.138474		9.14984	8.82137	9.33264	8.95699	9.06361	8.5499	8.99097	8.84083	9.03791	8.89984	8.84595	8.61188		#N/A
DNAJB9	ENSG00000128590	DNAJB9	0.338382	0.138677		8.21151	8.57006	8.25203	8.91206	8.36596	8.6063	8.06078	8.46554	8.39109	8.61658	8.0995	8.16443		#N/A
DUSP12	ENSG00000081721	DUSP12	0.332911	0.138677		8.25582	8.57006	8.18754	8.38661	7.8324	8.33007	8.28222	8.65117	7.86165	8.23856	7.97006	8.18787		#N/A
ENSG00000258056	ENSG00000258056	ENSG00000258056	-0.53977	0.138677		5.51126	5.62408	5.71583	5.16995	6.30435	5.13906	5.50871	5.19592	5.83997	5.31917	5.82673	5.37835		#N/A
ENSG00000130723	ENSG00000130723	ENSG00000130723	-0.165424	0.138925		12.3762	12.3285	12.5275	12.3543	12.6941	12.4243	12.705	12.4768	12.4316	12.3192	12.5681	12.4174		#N/A
NOA1	ENSG00000084092	NOA1	-0.283635	0.138925		8.60749	8.27905	9.00922	8.53919	8.57555	8.26787	8.65017	8.55289	8.51488	8.21292	8.68457	8.50023		#N/A
SHQ1	ENSG00000144736	SHQ1	-0.315813	0.138929		8.11857	7.85525	7.87289	7.65892	7.88343	7.28647	7.97342	7.72384	7.78503	7.44547	8.11225	7.81898		#N/A
DNASE1	ENSG00000213918	DNASE1	-0.337367	0.138982		8.57725	8.20083	8.72102	8.6056	8.67407	8.37208	8.9619	8.55627	8.61946	8.16021	9.01618	8.65625		#N/A
D2HGDH	ENSG00000180902	D2HGDH	-0.512057	0.139018		8.09437	7.69665	8.48072	7.94867	7.66748	7.39522	7.8169	7.22518	8.77188	8.00448	8.18246	7.83688		#N/A
ACTG1P25	ENSG00000234996	ACTG1P25	-0.951188	0.139468		4.69825	3.55015	5.3622	4.14686	5.15599	4.34327	5.70013	5.50717	4.85407	3.87224	5.60409	4.62512		#N/A
RSF1	ENSG00000048649	RSF1	-0.284137	0.139518		11.0461	10.8024	11.0168	10.6914	11.0185	10.7037	11.1995	10.9195	10.7804	10.7123	10.7784	10.2673		#N/A
COQ5	ENSG00000110871	COQ5	-0.18692	0.139641		8.74209	8.64147	8.91277	8.71165	8.83828	8.6213	8.86243	8.69176	8.82752	8.42324	8.71554	8.66629		#N/A
ABHD17C	ENSG00000136379	ABHD17C	-0.519845	0.139728		8.13052	7.51084	8.88398	8.06817	8.2596	7.78103	7.95208	7.77123	8.74901	8.26376	8.66451	8.26483		#N/A
SBF2-AS1	ENSG00000246273	SBF2-AS1	-1.07739	0.139972		4.82131	3.42622	5.45906	4.01709	5.41576	4.60719	5.35454	3.68095	5.32529	5.45665	6.20559	5.31163		#N/A
DCUN1D4	ENSG00000109184	DCUN1D4	0.298886	0.140413		8.90052	9.09759	8.57738	9.26993	9.02842	9.25527	9.22478	9.1156	8.75189	9.15346	8.6265	9.0761		#N/A
PAN3	ENSG00000152520	PAN3	0.249105	0.140534		9.24085	9.59519	9.62478	9.76664	9.41036	9.44151	9.63963	9.89328	9.25637	9.68578	9.32633	9.57634		#N/A
TTC21B	ENSG00000123607	TTC21B	-0.290468	0.140573		8.23936	8.27006	8.70465	8.26324	8.65741	8.40135	8.78305	8.6094	8.71106	8.38929	8.75943	8.25154		#N/A
SCYL2	ENSG00000136021	SCYL2	0.246139	0.140734		10.414	10.6165	10.3483	10.7151	10.3161	10.585	10.1895	10.3614	10.4058	10.4605	10.0564	10.4654		#N/A
ZNF514	ENSG00000144026	ZNF514	-0.479605	0.140734		8.80309	8.4359	9.46292	9.19877	9.04452	8.7543	9.48472	8.76968	9.08433	8.63117	9.735	9.05586		#N/A
RLF	ENSG00000117000	RLF	0.296687	0.140734		8.94179	9.23321	9.30033	9.86421	9.37258	9.41017	9.58521	9.56717	9.04262	9.42042	9.14999	9.62524		#N/A
TTF2	ENSG00000116830	TTF2	-0.285004	0.140734		9.35474	9.12276	9.60198	9.39112	9.63756	9.15572	9.61098	9.30465	9.75956	9.54127	9.78098	9.52389		#N/A
PSMA3	ENSG00000100567	PSMA3	0.193753	0.140734		9.97786	10.2639	9.99825	9.98736	10.1157	10.2634	9.95207	10.2633	9.95708	10.1818	9.91073	10.097		#N/A
GINM1	ENSG00000055211	GINM1	0.193547	0.140734		8.66202	8.82444	8.8094	8.93695	8.68233	8.92122	8.64353	8.7957	8.52501	8.81288	8.50283	8.68618		#N/A
TRMT61A	ENSG00000166166	TRMT61A	0.505645	0.140734		7.14509	7.72323	6.25475	6.8293	6.3256	6.93264	6.28224	6.96475	6.7198	6.75194	6.5807	6.86772		#N/A
RCOR1	ENSG00000089902	RCOR1	0.350933	0.141115		9.90842	9.83034	9.91533	10.5577	10.0115	10.5224	9.68563	9.89461	9.64344	9.98184	9.63251	10.0402		#N/A
ENSG00000275322	ENSG00000275322	ENSG00000275322	0.879922	0.141115		3.2897	4.12923	4.26557	4.66299	4.26609	5.02333	3.5088	4.65428	4.34539	4.87182	3.49887	4.32034		#N/A
INAFM2	ENSG00000259330	INAFM2	-0.639549	0.141522		9.18751	8.60621	9.08705	8.36343	8.42621	7.20912	7.82866	7.33177	8.88896	8.57691	8.7915	8.29967		#N/A
TMEM199	ENSG00000244045	TMEM199	0.436238	0.141588		6.90185	7.11888	5.95603	6.63285	6.38752	6.78054	6.33267	6.64672	6.44887	6.69749	6.1071	6.83246		#N/A
HERC1	ENSG00000103657	HERC1	-0.32514	0.141924		10.8148	10.4809	10.5929	10.3469	10.5405	10.1281	10.3992	9.82753	10.56	10.4035	10.34	10.082		#N/A
ZNF467	ENSG00000181444	ZNF467	-1.01072	0.141924		6.02809	5.20101	8.38124	6.68719	8.24295	7.15516	8.28649	8.01221	8.20616	7.18024	8.09094	6.93576		#N/A
PXDC1	ENSG00000168994	PXDC1	0.816095	0.14195		8.77672	8.96747	8.91277	10.1246	8.2706	9.2359	7.50869	8.17525	9.18787	9.84662	8.87118	9.63891		#N/A
ERVK13-1	ENSG00000260565	ERVK13-1	0.600211	0.14195		7.93996	8.61688	9.11209	9.64148	8.03298	8.73603	8.11941	8.62238	8.29962	9.04135	8.28738	8.73155		#N/A
LIMA1	ENSG00000050405	LIMA1	0.697591	0.142214		11.8512	12.3045	11.6241	12.5678	10.8537	11.6759	10.5301	11.0603	11.4051	11.7734	10.9241	11.9036		#N/A
PDE7A	ENSG00000205268	PDE7A	0.36721	0.142214		10.3807	10.5118	10.6513	11.0331	10.6168	10.8542	10.6526	11.1014	10.5624	10.8704	10.8028	11.3808		#N/A
DERL2	ENSG00000072849	DERL2	0.209744	0.142214		8.8363	9.022	9.00922	9.51046	9.13755	9.31494	9.08468	9.28028	9.02845	9.07378	9.00483	9.13758		#N/A
MYCT1	ENSG00000120279	MYCT1	-0.807691	0.142214		5.89431	5.41175	6.57596	5.5206	6.75943	5.93176	5.28795	4.54944	5.79602	5.41226	5.76347	4.82969		#N/A
ENSG00000269688	ENSG00000269688	ENSG00000269688	0.502776	0.142214		5.03981	5.34487	5.42749	5.80247	5.37558	5.96351	5.02719	6.13323	5.35588	5.49971	5.39738	5.64542		#N/A
COASY	ENSG00000068120	COASY	-0.240042	0.143068		9.63614	9.39486	9.5369	9.2025	9.435	9.22285	9.18645	8.93489	9.53565	9.34863	9.42673	9.22854		#N/A
GTPBP4	ENSG00000107937	GTPBP4	0.298977	0.14325		10.4104	10.5651	10.0076	10.52	10.0708	10.2229	10.0074	10.2508	9.83208	10.2015	10.0275	10.3936		#N/A
IGSF9	ENSG00000085552	IGSF9	-0.62582	0.143408		9.31341	8.79028	9.62304	9.05324	10.4671	9.86572	10.7617	10.1423	9.97444	9.19336	10.1061	9.5128		#N/A
NFATC3	ENSG00000072736	NFATC3	-0.407463	0.143819		8.27748	7.97619	8.67134	8.14396	9.21928	8.48028	9.06493	8.7755	8.57788	8.16021	8.66451	8.49272		#N/A
RUFY2	ENSG00000204130	RUFY2	0.241727	0.14418		8.46376	8.62395	8.46526	8.77826	8.45541	8.75883	8.50013	8.75502	8.25972	8.50477	8.12069	8.26041		#N/A
C9orf40	ENSG00000135045	C9ORF40	-0.3856	0.144635		7.72035	7.54103	7.43859	7.25337	8.23174	7.63095	7.66774	7.40872	7.76236	7.20647	7.83299	7.42037		#N/A
TMEM177	ENSG00000144120	TMEM177	-0.409318	0.14489		6.9963	6.78223	7.29728	6.86745	7.33179	6.99541	7.37872	6.82575	7.27843	6.66002	7.62924	7.36387		#N/A
CTTNBP2	ENSG00000077063	CTTNBP2	-0.771951	0.144928		8.15997	7.82489	9.08199	7.71231	8.53508	8.0111	8.7401	8.22717	8.83297	8.25122	10.0253	9.10348		#N/A
CDC40	ENSG00000168438	CDC40	-0.307239	0.144928		8.45902	8.34471	8.91277	8.47267	8.64901	8.09232	8.74941	8.62561	8.82479	8.50477	8.8383	8.5481		#N/A
PDP2	ENSG00000172840	PDP2	-0.497755	0.144928		7.68027	7.84318	8.07997	7.55169	8.49814	7.60098	8.50013	7.92059	8.29962	8.13994	8.8306	8.11148		#N/A
ZBED9	ENSG00000248496	ZBED9	-0.356229	0.144928		7.04762	6.73077	7.38207	7.19455	7.60804	6.86701	7.70011	7.33177	7.27843	7.23223	7.41268	6.96861		#N/A
HCFC2	ENSG00000111727	HCFC2	0.41562	0.144928		6.98318	6.83192	6.98666	7.42948	7.1884	7.29896	6.60302	7.67483	6.84371	7.52057	6.9174	7.1322		#N/A
TRIM55	ENSG00000147573	TRIM55	1.28017	0.145115		9.54979	10.2377	6.39193	8.69848	7.39344	8.94924	5.14475	6.48556	8.71696	9.25434	7.34227	8.55172		#N/A
VSIR	ENSG00000107738	VSIR	0.820561	0.145222		9.18751	9.5402	9.02249	10.3282	8.97228	10.1051	7.47914	8.59301	9.36565	9.66938	8.75943	9.42676		#N/A
GAS1RR	ENSG00000226237	GAS1RR	-1.27465	0.145222		2.90062	2.31157	4.58462	3.33562	4.83894	3.60277	4.54721	3.9517	4.34539	2.73574	4.27957	3.93344		#N/A
PSMD12	ENSG00000197170	PSMD12	0.372233	0.145311		10.2526	10.4385	9.81673	10.2971	9.83751	10.1948	9.61268	10.1184	9.77521	10.0702	9.46534	9.92493		#N/A
RAD51C	ENSG00000108384	RAD51C	-0.565803	0.145335		7.0093	6.4256	8.31377	7.89427	7.90476	7.14134	7.99967	7.4457	7.80179	7.2947	7.9274	7.35562		#N/A
PEDS1	ENSG00000240849	PEDS1	0.380088	0.14539		9.66107	9.88873	9.54428	10.2599	9.65655	10.1051	9.21361	9.54859	9.31594	9.69044	9.4537	9.56206		#N/A
PRKAA1	ENSG00000132356	PRKAA1	0.223466	0.14539		10.0892	10.2819	9.8676	10.1246	10.1828	10.1695	10.0113	10.3171	9.79488	10.145	9.87002	10.1264		PRKAA1
ZFP90	ENSG00000184939	ZFP90	-0.266232	0.14539		9.67746	9.52329	9.58777	9.42829	9.47595	9.07809	9.77192	9.39252	9.59296	9.34863	9.44532	9.15909		#N/A
EGLN1	ENSG00000135766	EGLN1	0.866582	0.14539		7.12133	7.91411	6.56148	7.04442	6.16987	7.19582	5.56604	5.80918	5.83997	6.96666	5.74175	7.1029		#N/A
AMZ2P1	ENSG00000214174	AMZ2P1	-0.450826	0.14539		6.60912	6.51957	6.8143	6.00431	6.89351	6.29828	7.0066	6.7089	7.21309	6.3894	6.9174	6.86772		#N/A
ENSG00000287110	ENSG00000287110	ENSG00000287110	-0.696662	0.145589		5.27331	4.65611	5.5202	4.78762	5.15599	3.60277	5.47917	4.84356	4.67153	4.49998	5.05395	4.78121		#N/A
SOCS6	ENSG00000170677	SOCS6	0.572912	0.146068		9.94947	10.5354	9.37256	10.2795	9.37513	9.79469	9.26862	9.56044	9.25231	9.80431	8.88858	9.43853		#N/A
DNAJC14	ENSG00000135392	DNAJC14	-0.239697	0.146068		8.10046	7.85525	8.27882	8.01816	8.22044	7.9804	8.44006	8.22717	8.02763	7.84666	8.26851	7.98873		#N/A
DUSP11	ENSG00000144048	DUSP11	0.399364	0.146353		8.44952	8.81211	8.36049	8.81533	7.95334	8.49122	7.80504	8.22291	8.25972	8.41201	7.99322	8.41936		#N/A
TCF7L2	ENSG00000148737	TCF7L2	0.326566	0.146456		9.58712	9.74212	9.30468	9.81381	9.10106	9.79248	9.40055	9.48249	9.29439	9.52573	9.04971	9.34154		#N/A
CMTM1	ENSG00000089505	CMTM1	-0.913088	0.146456		4.06298	3.77003	5.06675	4.20762	5.6014	4.02002	5.06745	4.70398	4.97726	4.93594	5.67457	4.38666		#N/A
CIT	ENSG00000122966	CIT	-0.374486	0.146486		9.58278	9.4356	10.1571	9.60242	10.2229	9.93941	10.477	10.0359	9.89463	9.41481	10.2302	9.90527		#N/A
PTPRU	ENSG00000060656	PTPRU	-0.212685	0.146555		11.9611	11.6737	12.5373	12.4113	12.6336	12.3254	12.6984	12.4985	12.1391	11.9355	12.2082	12.0444		#N/A
LARS1	ENSG00000133706	LARS1	-0.240383	0.146555		10.9193	10.7946	11.0001	10.774	11.2283	10.7477	11.1447	10.8453	10.9027	10.6312	11.1062	11.0509		#N/A
NCOA3	ENSG00000124151	NCOA3	-0.296129	0.146555		10.6942	10.5512	11.0733	10.5312	10.8898	10.4955	10.7679	10.446	10.8745	10.7429	10.4835	10.2462		#N/A
PPP6C	ENSG00000119414	PPP6C	0.218648	0.146555		9.77394	9.92209	9.45902	9.79537	9.63331	9.81876	9.55897	9.81487	9.60734	9.73392	9.40444	9.6642		#N/A
TDRKH	ENSG00000182134	TDRKH	-0.458953	0.146555		7.72035	7.1968	7.54539	7.00217	7.79481	7.22231	7.44134	7.17319	6.81095	6.83835	7.25297	6.51427		#N/A
C17orf100	ENSG00000256806	C17ORF100	-0.54533	0.146555		5.54736	5.31023	5.91108	5.42149	6.44688	5.8993	5.67429	5.19592	5.65551	4.93594	5.50443	5.00883		#N/A
ZNF630	ENSG00000221994	ZNF630	-0.532587	0.146555		5.54736	4.95414	5.84092	5.28719	5.24787	5.08235	5.56604	4.79852	5.77353	5.27027	5.31153	5.09069		#N/A
SLC17A5	ENSG00000119899	SLC17A5	0.673945	0.146588		8.90052	9.04852	8.49602	9.77419	8.15074	9.01131	7.76887	8.28137	8.63825	9.08088	8.034	8.58388		#N/A
P4HTM	ENSG00000178467	P4HTM	0.443367	0.146588		8.27748	8.12313	8.56655	9.26637	8.53963	9.28384	8.33678	8.91128	8.71696	8.79571	8.40949	8.98538		#N/A
IDH3B	ENSG00000101365	IDH3B	0.170408	0.146588		9.56967	9.66882	9.7481	9.77293	9.61617	9.85094	9.56426	9.68477	9.52054	9.82138	9.5568	9.80121		#N/A
FRA10AC1	ENSG00000148690	FRA10AC1	-0.436187	0.146588		8.48252	7.99812	9.01188	8.37341	8.6149	8.05597	8.69583	8.44376	9.18148	8.57691	8.87617	8.79703		#N/A
DARS2	ENSG00000117593	DARS2	-0.258724	0.146588		9.28696	8.92231	8.87815	8.69318	8.91736	8.61132	8.78908	8.66378	8.88372	8.57188	8.93716	8.68289		#N/A
CYTOR	ENSG00000222041	CYTOR	1.06177	0.146588		7.79733	7.89085	5.32841	6.94087	5.7023	7.3479	5.25346	6.2715	6.18486	7.18024	5.15601	6.66885		#N/A
NCAPD2	ENSG00000010292	NCAPD2	-0.383162	0.146805		10.8167	10.5806	11.5745	11.0917	11.5861	11.2015	11.6434	11.2289	11.2257	10.8611	11.6344	11.2555		#N/A
SNHG18	ENSG00000250786	SNHG18	-0.7324	0.146805		7.08495	6.45761	8.42186	7.45477	8.03298	7.09909	7.8519	6.86996	7.93947	7.91187	8.49311	7.68702		#N/A
PRR22	ENSG00000212123	PRR22	0.755964	0.147676		3.72754	4.34994	4.11516	4.78762	4.50829	4.83021	3.91402	4.65428	4.07814	5.11277	4.64978	5.12995		#N/A
C6orf132	ENSG00000188112	C6ORF132	0.709582	0.148077		9.73533	10.0614	9.3767	10.5895	8.86754	9.80129	8.61325	8.87377	9.59457	10.0576	8.77288	9.54219		#N/A
CDK13	ENSG00000065883	CDK13	0.196653	0.148077		10.3023	10.4534	10.4792	10.7734	10.3911	10.6413	10.3794	10.4793	10.393	10.6928	10.3704	10.4304		#N/A
ACAP2	ENSG00000114331	ACAP2	-0.240979	0.148077		9.58495	9.22161	9.3767	9.07786	9.70193	9.39279	9.48286	9.46097	9.53398	9.22257	9.40098	9.26426		#N/A
NAA60	ENSG00000122390	NAA60	0.201389	0.148077		8.94179	9.14995	8.85757	9.00271	8.73488	8.98449	8.80999	9.12703	8.85456	9.00446	8.76213	8.87419		#N/A
LINC01232	ENSG00000280734	LINC01232	-1.10978	0.148254		3.9596	3.14098	4.46533	2.65209	3.86308	3.43174	4.42857	3.21651	4.40513	4.41255	4.08631	3.52595		#N/A
EFCAB5	ENSG00000176927	EFCAB5	-1.00855	0.148336		4.15945	4.12923	3.85531	2.81715	4.26609	3.23767	4.08067	3.77696	4.93736	3.73482	4.15365	3.26893		#N/A
KCTD3	ENSG00000136636	KCTD3	0.323451	0.149044		10.1403	10.3205	10.4172	10.8676	9.99994	10.344	10.0904	10.2497	10.2177	10.4821	10.1335	10.6095		#N/A
PCMTD1	ENSG00000168300	PCMTD1	-0.34589	0.149044		10.1418	10.0808	10.2286	9.79784	9.92188	9.19637	9.94263	9.57887	10.0617	9.90184	9.98887	9.571		#N/A
INO80E	ENSG00000169592	INO80E	-0.27935	0.149044		9.24085	9.09759	9.08958	8.86333	9.38528	9.21627	9.2001	8.6825	9.39541	8.93556	9.13341	8.96653		#N/A
CDCA8	ENSG00000134690	CDCA8	-0.39304	0.149075		8.67023	8.47943	9.32409	8.50631	9.38781	9.08532	9.4754	9.09247	8.69619	8.61168	9.32268	8.78785		#N/A
C16orf87	ENSG00000155330	C16ORF87	-0.404667	0.149257		9.03375	8.53299	10.2229	9.46608	9.8301	9.05985	9.6953	9.60527	9.33335	9.21935	9.08032	8.845		#N/A
P3H4	ENSG00000141696	P3H4	-0.241935	0.149257		9.6065	9.5119	9.61255	9.34284	9.91839	9.78362	9.84323	9.57887	9.73212	9.3691	9.71424	9.38883		#N/A
RAD52	ENSG00000002016	RAD52	-0.388015	0.149257		7.73608	7.66958	7.98557	7.83292	8.13277	7.62103	8.49645	7.94146	8.14177	7.76958	8.4866	7.96722		#N/A
CLDN15	ENSG00000106404	CLDN15	0.450915	0.149257		6.34766	6.92644	6.73914	7.33733	7.08007	7.22231	6.68294	7.16434	7.03547	7.08449	6.90768	7.68043		CLDN15
MTARC2	ENSG00000117791	MTARC2	-0.708125	0.149257		6.26334	5.31023	6.342	5.25876	6.80552	5.5268	6.39727	6.47128	6.54495	6.34286	6.18963	5.12995		#N/A
C10orf82	ENSG00000165863	C10ORF82	-0.296279	0.149393		8.15997	8.08265	8.21553	7.68051	8.21476	7.59086	8.30766	8.13052	8.36124	8.19338	8.36401	8.13096		#N/A
WDR45B	ENSG00000141580	WDR45B	0.21918	0.150041		10.4311	10.5887	10.2626	10.4736	10.292	10.6252	10.0916	10.3091	10.3452	10.5528	10.1877	10.3651		#N/A
CEP170B	ENSG00000099814	CEP170B	0.562097	0.150143		11.3539	11.5887	10.3878	11.3421	10.2825	11.02	10.1803	10.6649	10.7965	11.1236	10.063	10.7834		#N/A
RRN3	ENSG00000278494	RRN3	0.31449	0.150143		9.42677	9.67223	9.059	9.54619	9.08557	9.42735	9.26862	9.42623	8.9504	9.29769	8.89597	9.20346		#N/A
PPP1R3E	ENSG00000235194	PPP1R3E	-0.730872	0.150349		5.68337	5.5066	6.70004	5.5206	6.44688	5.76161	6.98574	6.28789	6.69608	6.21949	7.25297	6.49935		#N/A
TSPYL1	ENSG00000189241	TSPYL1	0.237938	0.150599		9.87329	10.151	10.0235	10.2143	9.97831	10.1385	9.65458	9.98282	9.80739	9.99883	9.63399	9.92074		#N/A
COG6	ENSG00000133103	COG6	-0.339914	0.150626		9.14691	8.64495	8.81551	8.38989	8.88195	8.41289	8.84805	8.46913	8.7662	8.81714	8.52525	8.23813		#N/A
ZNF416	ENSG00000083817	ZNF416	0.454421	0.150727		6.78575	7.12885	6.65986	7.01072	6.23868	6.74444	6.69584	6.82575	5.88263	6.78712	6.55602	7.0629		#N/A
RTEL1-TNFRSF6B	ENSG00000026036	RTEL1-TNFRSF6B	1.04631	0.150727		3.2897	5.04121	3.94723	3.94755	3.46391	3.75566	3.10674	3.68095	3.32417	4.58241	3.49887	4.01957		#N/A
ITGAV	ENSG00000138448	ITGAV	0.571334	0.151186		12.6168	12.815	11.1755	12.1034	11.3415	12.0949	10.9679	11.612	11.8878	12.2201	11.3062	12.0227		#N/A
CUEDC1	ENSG00000180891	CUEDC1	0.590938	0.151186		8.90748	9.32065	9.11209	9.67817	9.02518	9.86991	8.18493	8.48699	8.7888	9.34273	9.09109	9.73273		#N/A
FAM83G	ENSG00000188522	FAM83G	0.460233	0.151186		9.28161	9.42755	8.6199	9.40901	8.69054	9.17957	8.35722	8.83527	8.8811	9.28851	8.36756	8.83315		#N/A
BCL7B	ENSG00000106635	BCL7B	0.28348	0.151186		9.18178	9.2493	8.75002	9.20809	9.14354	9.52633	9.0014	9.39252	8.92257	9.06663	8.84595	9.1084		#N/A
ARHGAP39	ENSG00000147799	ARHGAP39	-0.392186	0.151186		8.57725	7.98171	8.2016	7.62591	8.71087	8.27421	8.52564	8.37639	8.37251	7.82142	8.29858	8.20635		#N/A
SCN2A	ENSG00000136531	SCN2A	-1.12799	0.151186		4.5637	4.20661	3.27987	2.65209	4.50829	2.74768	4.85386	3.9517	5.26208	4.31948	4.86598	4.32034		#N/A
LINC02245	ENSG00000237638	LINC02245	-1.33232	0.151186		3.2897	2.56766	4.40176	4.08344	4.50829	2.42174	4.98577	3.86697	4.07814	3.73482	5.12278	3.63911		#N/A
ANKAR	ENSG00000151687	ANKAR	-0.709235	0.151306		5.27331	4.20661	5.71583	5.07531	4.95254	4.68542	5.14475	4.60281	5.4152	3.9977	5.25131	5.16816		#N/A
MORC3	ENSG00000159256	MORC3	0.279122	0.151502		9.37999	9.74375	9.21275	9.63043	9.20502	9.31186	9.14707	9.44096	9.26446	9.38066	8.98648	9.30984		#N/A
BRF2	ENSG00000104221	BRF2	0.677225	0.1519		6.64289	6.89172	5.48995	6.21134	5.33426	6.34724	5.14475	6.35165	5.65551	5.87162	5.67457	6.10542		#N/A
KIFBP	ENSG00000198954	KIFBP	0.447224	0.152117		9.34964	9.61484	8.63725	9.51046	9.25293	9.48591	8.90193	9.4076	8.92512	9.49945	8.58135	8.84205		#N/A
CCNT1	ENSG00000129315	CCNT1	0.240351	0.152294		9.35219	9.65163	9.54428	9.84043	9.46642	9.81659	9.778	10.0065	9.41915	9.65992	9.71564	9.77359		#N/A
BARX2	ENSG00000043039	BARX2	-1.11781	0.152825		5.71546	5.78411	8.04918	6.43108	8.45058	7.35987	7.27078	6.20402	8.35746	7.70665	7.95598	6.08559		#N/A
GJA3	ENSG00000121743	GJA3	2.20041	0.153161		2.3662	3.77003	2	5.13909	2	4.43671	4.15728	4.92963	2	3.73482	3.5989	4.45007		#N/A
GMPS	ENSG00000163655	GMPS	-0.221802	0.153279		10.281	10.0311	10.4973	10.2355	10.6477	10.3166	10.5867	10.4136	10.3622	10.2274	10.5731	10.3916		#N/A
KLF11	ENSG00000172059	KLF11	-0.542507	0.153347		7.87041	7.46433	8.05952	6.96746	8.59754	7.65058	7.60073	7.28355	8.16787	8.04865	7.80708	7.55625		#N/A
ARID5B	ENSG00000150347	ARID5B	0.47439	0.153419		8.89352	8.56272	9.36216	9.90032	9.2362	9.77246	9.32575	9.48959	8.90973	9.60428	8.97023	9.87237		#N/A
USP38	ENSG00000170185	USP38	0.29973	0.153605		8.53292	9.14012	8.82159	8.88209	8.80841	8.99604	8.80107	8.96577	8.62575	9.12967	8.39217	8.60841		#N/A
RNF19B	ENSG00000116514	RNF19B	0.567731	0.15368		8.83995	9.36984	8.99314	9.98193	8.69054	9.08893	8.50013	8.64164	8.60361	9.19007	8.27986	8.68947		#N/A
ZBTB8B	ENSG00000273274	ZBTB8B	-0.830781	0.15368		5.74685	5.92814	7.19787	6.94087	7.65914	5.64898	7.51598	6.85903	7.22142	6.45651	7.80184	6.75925		#N/A
DDX41	ENSG00000183258	DDX41	0.205187	0.153997		9.97289	10.1896	9.8676	10.0938	9.82824	10.1695	9.87335	10.0872	9.81015	9.80001	9.92405	10.13		#N/A
CPT1C	ENSG00000169169	CPT1C	-0.459372	0.154361		8.5946	8.01972	8.60587	8.04754	8.62351	8.63122	9.07731	8.61266	8.36876	7.51007	8.80465	8.39942		#N/A
ENSG00000260563	ENSG00000260563	ENSG00000260563	-0.825644	0.154782		4.24987	4.4803	5.22203	3.94755	4.64976	4.02002	5.25346	4.79852	5.0161	3.87224	5.47841	4.62512		#N/A
PHF23	ENSG00000040633	PHF23	0.334237	0.154839		9.81524	10.1075	9.61079	10.0756	9.59227	9.96708	9.7704	9.92375	9.1578	9.79785	9.44868	9.5349		#N/A
CEBPA-DT	ENSG00000267296	CEBPA-DT	-0.944849	0.154915		4.24987	3.86855	5.95603	5.10755	5.88511	5.13906	5.95746	4.79852	5.70389	4.21999	6.07272	5.56177		#N/A
TNFAIP1	ENSG00000109079	TNFAIP1	0.540802	0.154985		10.9423	11.1472	9.90963	10.7229	9.95123	10.7049	9.69208	10.3241	10.1978	10.474	9.71703	10.3926		#N/A
EIF2S1	ENSG00000134001	EIF2S1	0.243954	0.154985		10.1029	10.2673	9.80449	10.2812	10.1309	10.034	9.85334	10.1378	9.88155	10.0432	9.76492	10.2395		#N/A
PRRT1	ENSG00000229071	PRRT1	0.82363	0.154985		5.22954	5.20101	4.46533	6.22609	5.33426	5.34592	5.7991	6.7089	5.0161	5.66014	4.21798	5.47297		#N/A
LINC00869	ENSG00000277147	LINC00869	-0.928032	0.154985		4.82131	4.95414	4.6948	3.09955	5.63582	4.43671	4.70867	3.86697	4.85407	4.41255	5.28173	4.51081		#N/A
TMEM41B	ENSG00000166471	TMEM41B	0.327252	0.155122		9.72157	9.99479	9.53505	10.1078	9.89726	10.2344	9.50685	9.84148	9.314	9.52834	9.61171	9.82532		#N/A
SH3BP4	ENSG00000130147	SH3BP4	0.609624	0.15514		11.1161	11.5498	9.93089	10.4353	9.4712	10.5023	9.40448	9.9966	10.2062	10.8309	9.89729	10.4275		#N/A
C20orf194	ENSG00000088854	C20ORF194	0.356563	0.155692		8.85082	8.98405	8.83369	9.42988	8.77018	9.07809	8.51112	8.81279	8.7916	8.74739	8.42661	9.19192		#N/A
RPRD1B	ENSG00000101413	RPRD1B	0.283888	0.155754		9.04957	8.97302	9.14158	9.30337	9.16727	9.52367	9.16109	9.62636	8.91231	9.26374	9.17249	9.54401		#N/A
USP37	ENSG00000135913	USP37	0.366056	0.155754		7.83433	8.177	8.55929	8.77576	8.47456	8.51283	8.38934	8.98097	7.93947	8.52575	8.39217	8.7631		#N/A
SLC27A2	ENSG00000140284	SLC27A2	0.639983	0.155754		6.72399	7.61386	7.39844	8.66367	7.19995	7.22231	7.20913	7.53079	7.34094	7.78707	6.66389	7.05272		#N/A
C6orf163	ENSG00000203872	C6ORF163	-0.459957	0.155754		5.65055	5.5956	6.32497	5.5907	5.94124	5.34592	5.82281	5.5621	6.26765	5.80451	6.12399	5.77488		#N/A
REV3L	ENSG00000009413	REV3L	0.364696	0.156281		9.4508	10.1163	9.09963	9.63181	9.45442	9.44994	9.38669	9.71387	9.37689	9.70661	9.07815	9.32683		#N/A
UBE2Q2P2	ENSG00000282084	UBE2Q2P2	-0.599303	0.156281		6.94309	6.05909	7.65849	7.06098	7.69223	6.74444	7.59385	7.25882	7.84557	7.41205	7.79658	7.27911		#N/A
GOLGA3	ENSG00000090615	GOLGA3	0.380985	0.156284		10.5515	10.7339	10.0049	10.624	9.77904	10.3708	9.79308	10.1173	10.2187	10.4564	9.88496	10.2009		#N/A
ABCB8	ENSG00000197150	ABCB8	0.280757	0.156422		9.14396	9.34866	8.71776	9.20437	8.53963	8.9373	8.75866	8.99102	9.03082	9.2129	8.7862	8.93916		#N/A
PYM1	ENSG00000170473	PYM1	-0.246272	0.156718		8.94856	8.74236	8.74042	8.5971	8.69871	8.44136	8.76785	8.26904	8.65987	8.53613	8.71554	8.4507		#N/A
RNF139	ENSG00000170881	RNF139	0.354206	0.156848		9.29494	9.60416	8.97141	9.32067	9.20215	9.26167	8.89075	9.28437	8.75763	9.32488	8.61459	9.09854		#N/A
UBE2C	ENSG00000175063	UBE2C	-0.322185	0.157646		9.4048	9.13271	9.77814	9.30685	9.7281	9.74075	9.99184	9.65033	9.77379	9.29158	9.9168	9.55126		#N/A
LYST	ENSG00000143669	LYST	-0.710028	0.157748		7.42285	6.81966	6.99745	6.10356	6.9898	6.32297	6.85383	6.33597	7.81836	7.1125	6.34175	5.61807		#N/A
PSME4	ENSG00000068878	PSME4	0.30445	0.158059		11.3	11.4364	10.8601	11.3768	10.812	11.0153	10.7838	11.0344	11.0403	11.4042	10.7164	11.0681		#N/A
TSR1	ENSG00000167721	TSR1	0.222396	0.158172		9.52057	9.78059	9.58598	9.88645	9.55678	9.77022	9.68563	9.83173	9.49499	9.56428	9.70024	10.0076		#N/A
ZNF638	ENSG00000075292	ZNF638	-0.242434	0.158493		11.1101	10.992	11.5754	11.3052	11.4947	11.2745	11.6233	11.3827	11.5394	11.2113	11.56	11.3126		#N/A
SLC25A30	ENSG00000174032	SLC25A30	-0.437823	0.158493		7.40328	7.15836	7.27971	6.8196	7.24525	6.86701	7.24468	6.58174	7.52048	7.56179	7.46664	6.4224		#N/A
DDIT3	ENSG00000175197	DDIT3	0.611569	0.158493		5.80766	6.76954	5.99961	6.5414	6.0727	5.76161	5.38672	6.42757	5.38585	6.16703	6.37034	6.82052		#N/A
PPM1F	ENSG00000100034	PPM1F	-0.307357	0.159047		9.29494	9.01664	8.83067	8.50025	8.99897	8.71287	8.69904	8.42165	8.84919	8.56175	9.00711	8.62568		#N/A
COQ8A	ENSG00000163050	COQ8A	-0.488193	0.159127		7.07261	6.97148	7.67874	6.85801	7.42331	7.08473	7.76276	7.31587	7.72183	7.01198	8.03846	7.64699		#N/A
LIMCH1	ENSG00000064042	LIMCH1	-0.335987	0.159244		9.92909	9.67394	10.6658	10.0067	10.904	10.5117	10.8596	10.5692	10.3394	10.109	10.042	9.81482		#N/A
ENSG00000279347	ENSG00000279347	ENSG00000279347	0.580623	0.159832		4.69825	5.27473	4.89273	5.10755	5.20266	5.60939	5.06745	5.5621	4.76568	5.69761	5.36932	5.91631		#N/A
ZBTB7B	ENSG00000160685	ZBTB7B	0.369548	0.159866		9.18465	9.65853	9.33689	9.73215	9.13454	9.51833	8.85669	9.17408	8.90198	9.32189	8.88363	9.02756		#N/A
TAF6	ENSG00000106290	TAF6	-0.228593	0.159866		9.09601	8.70285	9.03039	8.70113	9.24459	9.04137	9.13528	9.04263	8.87318	8.68813	8.97953	8.80917		#N/A
ENSG00000257354	ENSG00000257354	ENSG00000257354	0.659836	0.159866		7.59659	8.00355	6.37548	7.32367	6.5942	7.6603	6.77091	7.50298	7.91399	8.01935	6.31258	7.25268		#N/A
BIRC3	ENSG00000023445	BIRC3	1.22478	0.159866		7.15682	7.33245	5.32841	6.62173	5.88511	8.32397	5.18191	5.85389	5.05391	5.69761	5.92637	6.97939		#N/A
TMEM19	ENSG00000139291	TMEM19	-0.322145	0.159866		7.47064	7.26169	7.29728	7.07735	7.80996	7.44105	7.65458	7.4457	7.68012	7.21941	7.46664	7.08304		#N/A
CPLANE2	ENSG00000132881	CPLANE2	-0.636242	0.159866		5.51126	4.65611	5.66259	4.57349	5.00615	4.75963	5.35454	4.54944	5.0161	4.73436	5.55512	5.44212		#N/A
KHK	ENSG00000138030	KHK	-0.987769	0.159953		3.59583	3.55015	4.33527	3.44059	5.15599	4.34327	4.29929	4.17958	4.51765	3.58292	5.08878	3.74403		#N/A
XPO7	ENSG00000130227	XPO7	-0.264092	0.160227		11.2309	11.0541	11.0365	10.6184	11.0579	10.8242	11.0124	10.801	10.8981	10.6263	10.8967	10.5964		#N/A
PDLIM2	ENSG00000120913	PDLIM2	0.907173	0.160227		8.40594	8.31006	6.88573	8.36009	6.2609	7.9804	5.75046	6.44228	7.91912	8.49416	7.0292	7.8428		#N/A
CRACR2B	ENSG00000177685	CRACR2B	-0.367214	0.160227		7.58795	7.12885	7.49298	7.10955	7.9188	7.35987	7.34636	7.18199	7.38611	7.07028	7.03814	6.85606		#N/A
ENSG00000273218	ENSG00000273218	ENSG00000273218	1.1937	0.160227		3.9596	3.77003	3.27987	4.57349	2	4.52446	3.72559	4.79852	3.44293	4.11312	4.21798	4.67905		#N/A
TOR1AIP1	ENSG00000143337	TOR1AIP1	0.395309	0.16031		9.66724	10.0885	9.00655	9.48768	9.12851	9.50761	9.14707	9.49313	9.01653	9.37199	9.05192	9.39891		#N/A
C21orf91	ENSG00000154642	C21ORF91	0.53172	0.16031		8.59029	8.93373	7.43859	8.36677	8.17435	8.79015	8.34499	8.84914	7.99884	8.51004	7.78601	8.15018		#N/A
ZNF417	ENSG00000173480	ZNF417	0.315347	0.16031		7.68027	8.23355	7.65849	8.0804	7.71655	8.01868	8.09527	8.33362	7.85095	8.04138	8.12069	8.32103		#N/A
FAM185BP	ENSG00000214439	FAM185BP	-1.2039	0.16031		2.90062	2.97397	5.02517	3.87449	3.97486	2.74768	4.23003	3.77696	4.57079	3.22064	4.21798	3.52595		#N/A
ENSG00000284024	ENSG00000284024	ENSG00000284024	0.279772	0.160339		8.20587	8.55164	8.2339	8.73764	8.58878	8.73143	8.68617	8.89533	8.43832	8.37201	8.23781	8.76933		#N/A
ARHGAP11A	ENSG00000275568	ARHGAP11A	-0.272728	0.160705		9.3974	9.17904	9.75766	9.36635	9.96821	9.70128	9.94938	9.66452	9.71452	9.45091	9.76088	9.55667		#N/A
FIG4	ENSG00000112367	FIG4	-0.344125	0.160966		8.82164	8.60263	9.059	8.36343	8.85663	8.51819	8.94038	8.5963	8.64446	8.51004	8.32072	7.98339		#N/A
CPNE8	ENSG00000139117	CPNE8	-0.320752	0.161609		7.69644	7.66958	7.73785	7.22426	7.47176	6.78054	7.34636	7.27535	7.88806	7.42327	7.9129	7.71311		#N/A
ZNF131	ENSG00000172262	ZNF131	0.330443	0.161627		8.91095	9.4235	9.30901	9.57674	9.40538	9.44994	9.61268	9.92112	9.02369	9.46998	9.3853	9.77204		#N/A
AGTRAP	ENSG00000177674	AGTRAP	-0.317274	0.161678		8.03839	8.16735	8.30076	7.5221	8.24852	7.95693	8.34908	8.02693	8.22285	7.99698	8.47677	8.08675		#N/A
PEX1	ENSG00000127980	PEX1	-0.3275	0.161785		8.9885	8.52545	9.35589	9.12587	9.33117	8.72681	9.05995	9.04263	9.41007	9.07021	9.28188	8.95017		#N/A
HEMK1	ENSG00000114735	HEMK1	-0.290946	0.161882		8.82532	8.74561	9.07437	8.54802	8.49345	8.26149	8.62341	8.35322	8.98017	8.66939	8.86868	8.60493		#N/A
SYNCRIP	ENSG00000135316	SYNCRIP	0.216713	0.162005		11.8021	12.0126	11.7756	12.0675	11.726	11.7522	11.8648	12.0917	11.529	11.8419	11.7887	12.0047		#N/A
MSI1	ENSG00000135097	MSI1	0.488221	0.162005		8.82899	9.01395	8.75956	9.68352	9.18772	9.6412	9.72077	10.0918	8.85723	9.39213	9.31718	9.81933		#N/A
FNTA	ENSG00000168522	FNTA	0.351985	0.162005		9.66313	9.83947	9.23116	9.58105	8.97228	9.53163	8.99097	9.4188	8.94286	9.31286	9.28564	9.54583		#N/A
INTS2	ENSG00000108506	INTS2	-0.254685	0.162005		8.6986	8.35749	8.72751	8.46336	8.65322	8.27421	8.73073	8.648	8.67207	8.30076	8.84341	8.69929		#N/A
PATL1	ENSG00000166889	PATL1	0.193416	0.162791		10.1225	10.1436	9.83489	10.15	9.89549	10.1763	9.91945	10.1468	9.83344	10.095	10.1624	10.2305		#N/A
NIPSNAP3B	ENSG00000165028	NIPSNAP3B	-1.14779	0.162791		3.84823	4.41659	5.79218	4.32195	5.91345	3.89388	6.29924	5.5621	5.35588	4.49998	6.53091	5.31163		#N/A
AUP1	ENSG00000115307	AUP1	0.211105	0.162825		10.124	10.3205	9.82129	10.1731	9.75575	10.1385	9.81246	9.84287	9.95708	10.063	9.98771	10.1528		#N/A
SCLT1	ENSG00000151466	SCLT1	-0.270401	0.162825		7.56171	7.40811	8.20626	7.73312	7.92578	7.8249	8.16187	7.99235	7.9645	7.55159	7.7807	7.54903		#N/A
PAXIP1-DT	ENSG00000273344	PAXIP1-DT	-0.653575	0.163077		5.43622	5.44407	6.8143	6.21134	6.74373	5.8321	6.86529	6.20402	6.7661	6.34286	7.01116	6.16333		#N/A
RPS6KC1	ENSG00000136643	RPS6KC1	-0.224922	0.163399		8.65376	8.47161	8.77532	8.39643	8.59317	8.37798	8.80999	8.69484	8.53841	8.2762	8.57523	8.36282		#N/A
ENSG00000242622	ENSG00000242622	ENSG00000242622	-0.598611	0.163399		5.83712	5.80913	6.23665	5.20016	5.73442	4.96178	6.08061	5.26377	5.55361	5.69761	6.5807	5.93859		#N/A
MAP3K9	ENSG00000006432	MAP3K9	0.47653	0.163691		10.2675	10.6874	9.60903	10.3544	9.50418	10.0636	9.57826	9.79494	9.71157	10.2354	9.40444	9.7005		#N/A
FBXO45	ENSG00000174013	FBXO45	0.277806	0.163691		8.06976	8.4598	8.12986	8.78076	8.56218	8.77234	8.55071	8.63204	8.12854	8.52053	8.47677	8.47758		#N/A
PSPN	ENSG00000125650	PSPN	-0.641857	0.163835		5.08963	4.76244	5.14648	5.20016	6.19317	4.68542	5.91396	5.19592	5.75069	5.11277	5.60409	5.37835		#N/A
ETS1	ENSG00000134954	ETS1	1.22838	0.163963		11.1444	11.7836	8.57738	10.1606	8.29234	10.3273	6.70863	8.34149	9.22978	10.1966	9.21646	9.571		#N/A
FASTKD3	ENSG00000124279	FASTKD3	0.310201	0.163963		6.70813	7.11888	6.30773	6.86745	6.72786	7.0258	6.79509	7.01484	6.74313	6.99703	6.84795	6.95774		#N/A
TMEM158	ENSG00000249992	TMEM158	1.46051	0.16418		6.02809	6.75673	3.27987	5.28719	3.46391	5.56869	3.62126	4.37633	4.76568	5.27027	3.01047	4.32034		#N/A
SNRK	ENSG00000163788	SNRK	0.259658	0.164202		8.16579	8.26555	8.40979	8.61684	8.3401	8.69407	8.40906	8.86561	8.38739	8.56175	8.44352	8.67627		#N/A
ENSG00000217801	ENSG00000217801	ENSG00000217801	0.953231	0.164608		6.12684	6.6774	4.93824	6.5414	4.64976	5.68751	4.54721	5.73939	4.97726	5.45665	5.01827	4.92204		#N/A
ENSG00000246089	ENSG00000246089	ENSG00000246089	-0.598588	0.164855		6.42732	5.95081	5.63521	4.90233	5.94124	5.24619	5.77498	5.50717	5.47217	5.31917	6.15718	5.12995		#N/A
ADGRF4	ENSG00000153294	ADGRF4	1.73295	0.164866		7.74388	8.51788	5.32841	8.24524	4.64976	6.5903	3.25356	3.77696	6.95781	7.69744	4.82525	5.91631		#N/A
MICU1	ENSG00000107745	MICU1	-0.184761	0.164866		9.27893	9.07455	9.50512	9.20063	9.40288	9.33328	9.29004	9.27618	9.31983	8.90385	9.26294	9.15671		#N/A
ENSG00000246477	ENSG00000246477	ENSG00000246477	0.774767	0.164866		3.9596	4.86147	3.41478	4.14686	3.74189	4.83021	3.82288	4.43637	4.14973	4.11312	4.21798	4.51081		#N/A
PRR36	ENSG00000183248	PRR36	-0.486296	0.165653		9.03056	8.66222	9.65746	8.94589	9.69379	8.8677	10.1584	9.94457	9.47945	8.98943	9.29871	8.81821		#N/A
ZNF583	ENSG00000198440	ZNF583	0.488184	0.165753		5.866	6.6774	5.71583	6.6657	6.19317	6.5903	6.77091	6.65937	5.94433	6.71587	6.05522	6.20068		#N/A
DFFA	ENSG00000160049	DFFA	-0.207313	0.165888		10.2039	10.0769	10.3494	10.2464	10.3579	10.2311	10.4391	10.0164	10.2557	9.96081	10.4538	10.2739		#N/A
MRPS22	ENSG00000175110	MRPS22	0.215667	0.165888		8.54636	8.60621	8.44963	8.81289	8.54417	8.57067	8.4779	8.61266	8.34608	8.65041	8.2104	8.58388		#N/A
N4BP2L1	ENSG00000139597	N4BP2L1	-0.906957	0.165888		5.58259	5.08285	6.96484	6.11946	6.30435	5.19362	6.81887	5.89727	7.34857	6.85502	7.51865	6.29003		#N/A
CIZ1	ENSG00000148337	CIZ1	-0.154389	0.165915		10.8702	10.8302	10.8135	10.5386	10.8129	10.6883	10.922	10.7924	10.9155	10.718	10.8744	10.7076		#N/A
LMTK2	ENSG00000164715	LMTK2	0.187197	0.166643		9.91015	10.0124	9.81825	10.1088	9.87762	9.98652	9.88466	10.2787	9.75956	9.93555	9.92164	9.94845		#N/A
DCUN1D5	ENSG00000137692	DCUN1D5	0.255519	0.167132		9.00157	9.08484	8.81246	8.94812	8.6616	8.89677	8.7648	8.95555	8.69917	9.20966	8.51248	8.89996		#N/A
NLRX1	ENSG00000160703	NLRX1	-0.436332	0.167132		7.38345	7.08853	8.12986	7.33733	8.08374	7.22231	7.56602	7.6241	7.74513	7.52057	8.08664	7.69359		#N/A
CFAP300	ENSG00000137691	CFAP300	-0.859595	0.167132		4.24987	3.14098	4.79715	3.71623	5.00615	4.43671	4.94313	4.31368	4.07814	3.87224	5.01827	4.38666		#N/A
H3C10	ENSG00000278828	H3C10	-1.05837	0.167402		3.72754	2.97397	4.58462	3.09955	3.97486	3.60277	4.15728	4.24819	3.65462	2.99847	4.39538	3.12092		#N/A
SOGA1	ENSG00000149639	SOGA1	-0.3898	0.167785		10.7877	10.5231	10.8704	10.3005	11.3304	10.9681	11.4556	11.113	11.07	10.7794	11.1927	10.6505		#N/A
RHBDD2	ENSG00000005486	RHBDD2	0.312853	0.167785		9.13212	9.37823	8.90419	9.25742	9.16727	9.67755	9.35248	9.61828	8.71696	9.05224	8.99109	9.15195		#N/A
ABHD14B	ENSG00000114779	ABHD14B	-0.402066	0.167785		6.60912	6.05909	7.10114	6.68719	7.12923	6.86701	6.98574	6.42757	7.02599	6.88781	6.98367	6.54363		#N/A
MED8-AS1	ENSG00000229431	MED8-AS1	0.767368	0.168076		4.76109	4.95414	4.26557	4.42788	3.11927	4.43671	3.99975	4.17958	4.07814	5.27027	3.9414	4.92204		#N/A
ABCF3	ENSG00000161204	ABCF3	0.304645	0.168547		9.27355	9.58979	9.19177	9.48308	8.7428	9.24562	8.87382	9.16967	8.97278	9.10896	9.07164	9.33105		#N/A
TVP23B	ENSG00000171928	TVP23B	0.24844	0.168548		8.57287	8.97854	8.6129	8.84432	8.57111	8.61132	8.22553	8.57309	8.60997	8.86733	8.53475	8.71873		#N/A
ETV2	ENSG00000105672	ETV2	1.17329	0.168548		2.90062	3.86855	3.41478	3.87449	3.30185	4.68542	3.99975	5.19592	3.83919	3.22064	3.5989	4.92204		#N/A
ASPM	ENSG00000066279	ASPM	-0.412517	0.168644		9.88038	9.81188	10.5386	10.0121	10.7066	10.1193	10.8247	10.5215	10.5351	10.1399	10.8113	10.2988		#N/A
LINC01659	ENSG00000280986	LINC01659	-2.58326	0.168644		3.2897	2	3.85531	2	5.10775	2	4.80707	2.91269	3.92331	2	4.74018	4.38666		#N/A
ANXA1	ENSG00000135046	ANXA1	0.948975	0.168737		12.6203	12.9612	13.2084	14.4923	12.2815	13.2952	11.1042	12.4671	12.9291	13.5032	11.4778	12.8762		#N/A
KANK4	ENSG00000132854	KANK4	-0.569542	0.168737		10.0784	9.73561	11.9187	11.2012	11.5578	10.797	11.3356	10.848	11.3072	10.8601	10.9409	10.3589		#N/A
ID3	ENSG00000283060	ID3	-0.422942	0.168737		11.4284	11.3915	11.9651	11.2017	12.4913	12.0559	11.9177	11.4661	11.7653	11.5166	12.0033	11.3975		#N/A
ENSG00000226824	ENSG00000226824	ENSG00000226824	0.691247	0.168737		5.22954	5.20101	4.46533	5.39561	3.30185	5.02333	4.36538	4.70398	4.97726	5.45665	4.86598	5.31163		#N/A
STX12	ENSG00000117758	STX12	0.367655	0.168771		9.17602	9.44162	8.67134	9.23388	8.78559	9.07809	8.43237	8.7755	8.77188	9.06305	8.51568	8.95291		#N/A
TTC19	ENSG00000011295	TTC19	0.20575	0.168862		9.47678	9.56612	9.5571	9.76411	9.60318	9.56306	9.49951	9.59048	9.35433	9.74291	9.35344	9.82233		#N/A
BDP1	ENSG00000274803	BDP1	0.20613	0.168893		10.6565	10.8032	10.312	10.7455	10.5951	10.5579	10.4853	10.6633	10.3404	10.6575	10.442	10.6489		#N/A
PLEKHG2	ENSG00000090924	PLEKHG2	0.332877	0.169421		11.5423	11.78	11.0392	11.2367	11.1291	11.6632	11.3153	11.7038	11.2939	11.4014	10.9283	11.4614		#N/A
FIGN	ENSG00000182263	FIGN	-0.440607	0.169421		8.98522	8.72274	9.44135	9.02187	9.18191	8.45259	9.58347	9.21107	9.33335	8.99696	9.79423	9.27306		#N/A
DYNLT4	ENSG00000188396	DYNLT4	1.8464	0.169421		4.33496	5.16269	2.77744	3.94755	2	4.60719	2	2.73285	4.14973	4.11312	2.8573	3.63911		#N/A
BLCAP	ENSG00000166619	BLCAP	0.510715	0.16964		9.43402	9.72414	9.38083	10.0089	8.7546	9.57338	8.5578	8.88189	9.35433	9.76293	8.92276	9.44632		#N/A
ARAP1	ENSG00000186635	ARAP1	-0.320076	0.16964		9.54756	9.2052	9.63863	9.18372	9.79245	9.51566	9.21585	8.986	9.81429	9.46184	9.60421	9.37255		#N/A
TRABD	ENSG00000170638	TRABD	-0.318436	0.16964		8.86877	8.70618	8.93819	8.78575	8.96891	8.38386	8.58579	8.22717	8.90715	8.41763	9.04307	8.8272		#N/A
IGSF9B	ENSG00000080854	IGSF9B	-0.59196	0.16964		8.18883	8.01972	7.50058	6.91377	7.38335	6.70742	8.40121	7.63695	7.81286	7.20647	8.12489	7.38024		#N/A
BBC3	ENSG00000105327	BBC3	-0.833358	0.16964		8.22828	8.12313	7.65167	6.56481	7.4622	6.27317	7.10659	6.09649	7.85095	7.27003	7.36376	5.64542		#N/A
ENSG00000286132	ENSG00000286132	ENSG00000286132	-1.19309	0.16964		5.18439	2.78507	3.85531	3.44059	3.74189	3.23767	4.23003	4.03173	3.83919	3.22064	5.25131	4.01957		#N/A
PTGS2	ENSG00000073756	PTGS2	0.760649	0.169715		5.89431	6.75673	5.6073	7.44218	6.82056	6.94859	5.449	6.59497	6.54495	6.82147	5.55512	5.96053		#N/A
ZFP64	ENSG00000020256	ZFP64	-0.363433	0.169976		8.935	8.65878	8.63725	8.18985	8.96891	8.54467	9.0014	8.77841	8.48058	8.28238	8.76483	8.12125		#N/A
NXPH3	ENSG00000182575	NXPH3	-1.04972	0.170491		4.5637	2.97397	4.52621	3.09955	4.77859	3.75566	4.89918	4.70398	4.89632	4.66039	5.01827	3.63911		#N/A
PCNT	ENSG00000160299	PCNT	-0.203181	0.170753		9.8554	9.58979	10.1156	9.95893	9.99	9.80349	10.1665	10.0189	10.1096	9.74514	9.96329	9.86367		#N/A
CNNM4	ENSG00000158158	CNNM4	-0.348508	0.170753		9.55645	9.29652	9.38083	9.1298	9.04132	8.49665	9.121	8.87106	9.26446	9.01191	9.32998	8.70904		#N/A
CNNM3	ENSG00000168763	CNNM3	-0.408115	0.170753		8.22271	8.13802	8.92977	8.33648	8.76241	8.22267	8.88513	8.50111	8.83569	8.48882	9.14999	8.75371		#N/A
SP2	ENSG00000167182	SP2	0.300233	0.170753		8.60749	8.8608	9.00922	8.90749	8.88195	9.22612	9.11381	9.54177	8.5908	8.97424	8.76483	9.18028		#N/A
SS18L1	ENSG00000184402	SS18L1	0.264998	0.170753		8.64962	9.12525	8.69142	9.20063	8.88553	9.26167	9.08468	9.07605	8.7662	8.95503	9.08679	9.17794		#N/A
NUDCD2	ENSG00000170584	NUDCD2	-0.237806	0.170753		8.58595	8.57006	9.06414	8.78326	9.20502	8.8635	9.11861	8.71012	8.92512	8.81714	8.93955	8.72195		#N/A
CSGALNACT2	ENSG00000169826	CSGALNACT2	0.276909	0.170753		7.93996	8.31444	7.83128	8.01392	7.9118	8.12076	8.02033	8.4401	7.77374	8.2258	8.02053	7.98339		#N/A
FCHSD2	ENSG00000137478	FCHSD2	-0.285836	0.170753		8.40101	8.10303	8.04399	7.78886	8.48875	7.99583	8.28649	8.19277	8.33076	7.91982	8.11225	7.97263		#N/A
GSN-AS1	ENSG00000235865	GSN-AS1	1.37279	0.170753		4.76109	5.12332	3.27987	4.47807	2.66556	5.39331	2.54738	3.07258	4.89632	4.99732	3.78029	4.51081		#N/A
RPS11P5	ENSG00000232888	RPS11P5	1.06214	0.170753		4.06298	4.59986	3.53815	4.14686	2.66556	3.89388	3.10674	4.10755	2.71767	3.87224	3.86309	4.10084		#N/A
ANKZF1	ENSG00000163516	ANKZF1	-0.302138	0.171135		9.50917	9.32933	9.55162	9.2192	9.22494	8.67981	9.42787	9.1087	9.47945	9.18349	9.74323	9.55307		#N/A
FAM162A	ENSG00000114023	FAM162A	-0.243933	0.17133		7.84887	7.70334	8.15417	7.78388	8.12673	8.06332	8.38537	8.07494	8.0133	7.69744	8.03846	7.83094		#N/A
IFT27	ENSG00000100360	IFT27	-0.400305	0.172496		8.35592	8.16735	8.99852	8.49112	9.00885	8.39554	9.17728	8.80996	8.94789	8.59192	9.14793	8.81821		#N/A
ENSG00000269981	ENSG00000269981	ENSG00000269981	0.541106	0.172666		5.92208	6.66375	6.18094	6.3792	5.05785	6.46282	6.22998	6.67191	5.96432	5.96676	6.1735	6.64195		#N/A
ALG14	ENSG00000172339	ALG14	0.472532	0.1727		6.15051	6.32508	5.68945	6.7901	6.40758	6.9002	6.28224	6.47128	6.3611	6.45651	5.57982	6.37417		#N/A
NOP2	ENSG00000111641	NOP2	0.807461	0.1727		4.69825	5.47567	3.85531	4.82688	4.77859	5.5268	4.36538	4.88724	3.83919	4.21999	4.50258	5.05034		#N/A
FOXJ2	ENSG00000065970	FOXJ2	0.270053	0.172783		9.37498	9.4356	9.20346	9.75904	9.2334	9.32414	9.24248	9.60853	9.48638	9.6384	9.04971	9.41885		#N/A
ZC3H8	ENSG00000144161	ZC3H8	-0.359384	0.172783		8.14237	7.86124	8.30076	8.17091	8.50281	7.88415	8.73386	8.48699	8.58758	7.97427	8.55357	8.28235		#N/A
DIAPH1	ENSG00000131504	DIAPH1	0.434758	0.173283		11.969	12.3215	11.4863	12.118	11.3673	11.8825	11.1066	11.492	11.3913	11.7474	11.2815	11.5954		#N/A
ZNF253	ENSG00000256771	ZNF253	-0.305631	0.173283		8.62026	8.41568	8.98503	8.54802	8.92086	8.49665	9.16109	9.0109	9.00933	8.71578	8.97256	8.63934		#N/A
FNDC1	ENSG00000164694	FNDC1	1.04287	0.173347		5.13779	5.80913	3.13102	3.79753	3.97486	4.83021	3.91402	4.31368	3.65462	4.99732	3.5989	5.00883		#N/A
ENSG00000245213	ENSG00000245213	ENSG00000245213	-0.704267	0.173402		4.69825	4.41659	4.19232	3.79753	4.71562	4.34327	4.29929	3.68095	4.81056	3.73482	4.86598	4.17778		#N/A
ASH1L	ENSG00000116539	ASH1L	-0.300131	0.173609		10.3259	10.0351	10.8682	10.335	10.8773	10.6015	10.5657	10.4767	10.7612	10.5296	10.7677	10.4057		#N/A
TBC1D12	ENSG00000108239	TBC1D12	-0.309665	0.173631		7.63904	7.45644	7.71188	7.40375	8.05859	7.44105	7.39463	7.33965	7.81836	7.61171	7.73196	7.35562		#N/A
MAML1	ENSG00000283780	MAML1	0.244957	0.173754		10.1506	10.4858	10.5578	10.7803	10.5753	10.7669	10.6862	11.0368	10.2628	10.47	10.5777	10.7421		#N/A
PPP1CC	ENSG00000186298	PPP1CC	-0.26881	0.173951		11.1583	11.0607	11.5509	11.171	11.7866	11.2401	11.5309	11.3899	11.4461	11.2777	11.6469	11.398		#N/A
CKS2	ENSG00000123975	CKS2	-0.331035	0.173951		9.0621	9.10771	8.97687	8.52135	9.40288	9.07082	9.39066	8.90863	9.01892	8.77395	9.21252	8.67627		#N/A
POLG2	ENSG00000256525	POLG2	-0.398701	0.173951		8.06354	7.80637	8.1445	7.83292	7.92578	7.51789	8.32021	7.88871	8.50809	7.95892	8.80203	8.41936		#N/A
PHF5A	ENSG00000100410	PHF5A	0.22886	0.173951		8.48718	8.68943	8.71449	8.84671	8.61058	8.72218	8.65017	8.98851	8.35746	8.59192	8.62056	8.92807		#N/A
NIPAL3	ENSG00000001461	NIPAL3	-0.472176	0.173951		8.56409	8.40751	8.35211	7.58069	8.2706	7.72656	8.0407	7.64969	8.46663	8.23219	8.10377	7.19832		#N/A
ZNF623	ENSG00000276340	ZNF623	0.339953	0.173986		9.59792	9.94627	8.99044	9.6456	9.14951	9.71999	9.28365	9.50018	9.21525	9.36619	9.29312	9.32472		#N/A
PPP1R8	ENSG00000117751	PPP1R8	0.162391	0.174174		9.5251	9.64295	9.63345	9.64697	9.60318	9.72925	9.56426	9.81204	9.42998	9.5541	9.29685	9.63209		#N/A
DUSP2	ENSG00000158050	DUSP2	-0.93479	0.174174		3.45087	3.29064	4.33527	3.79753	4.83894	3.60277	4.89918	4.49401	4.34539	3.9977	4.74018	3.26893		#N/A
ENSG00000286388	ENSG00000286388	ENSG00000286388	-0.428534	0.174258		6.88784	6.25395	7.31464	6.78014	7.08007	6.52796	6.96457	6.90225	7.05425	6.16703	7.09063	7.0629		#N/A
ASNS	ENSG00000070669	ASNS	0.994172	0.174386		4.93469	5.16269	2.96503	4.08344	3.86308	5.24619	4.08067	5.26377	5.19597	4.58241	4.39538	5.89368		#N/A
GPD1L	ENSG00000152642	GPD1L	-0.483662	0.174405		5.80766	5.88171	6.8143	6.44376	6.80552	5.72504	6.79509	6.3825	6.33062	6.08458	6.79621	6.12498		#N/A
PDIA3P1	ENSG00000180867	PDIA3P1	-0.489575	0.174405		6.10278	5.12332	6.40819	6.00431	6.48515	5.93176	6.29924	5.93937	6.55816	6.16703	6.49241	6.23709		#N/A
FN3K	ENSG00000167363	FN3K	-0.34677	0.174687		7.02219	6.69093	7.90763	7.84253	7.73255	7.16884	7.8519	7.39365	7.1878	6.8044	7.36376	7.03215		#N/A
SMARCD2	ENSG00000108604	SMARCD2	-0.254885	0.174861		10.403	10.2639	10.6237	10.3239	10.606	10.2792	10.3295	9.9803	10.1754	9.98374	10.4604	10.2339		#N/A
THUMPD1	ENSG00000066654	THUMPD1	0.223688	0.174861		9.76438	9.99888	10.0536	10.2581	9.96314	10.1069	10.1254	10.3161	9.68018	9.86731	9.92164	10.2706		#N/A
ANKS6	ENSG00000165138	ANKS6	-0.47327	0.175166		9.05271	8.66907	9.48225	8.66638	9.58127	8.8635	9.77496	9.40947	9.08661	9.00071	9.83583	9.3561		#N/A
TMEM53	ENSG00000126106	TMEM53	-0.355551	0.175208		7.25833	6.59346	6.97579	6.71885	7.00305	6.29828	6.95387	6.64672	6.60985	6.56185	6.87812	6.75925		#N/A
EHD1	ENSG00000110047	EHD1	0.715999	0.175497		11.3314	11.5882	10.257	11.3493	9.65235	10.9962	9.78556	10.2622	10.5175	10.9771	9.72812	10.473		#N/A
MPHOSPH9	ENSG00000051825	MPHOSPH9	-0.513229	0.175941		8.14237	7.83711	8.51492	7.83292	8.95534	8.44698	8.26502	7.72985	8.21035	7.77835	8.94193	8.40743		#N/A
UBE2Q2	ENSG00000140367	UBE2Q2	0.39509	0.175945		9.8536	10.105	9.28058	9.93105	9.34684	9.6461	9.33196	9.5332	9.36189	9.8632	8.97953	9.45987		#N/A
LPIN2	ENSG00000101577	LPIN2	0.54672	0.176009		9.72355	9.78217	9.73688	10.1354	10.292	10.7948	10.1062	10.9711	10.4076	11.0377	10.0564	10.6164		#N/A
RNF111	ENSG00000157450	RNF111	0.205256	0.176009		9.71167	10.0043	9.60198	9.96003	9.58568	9.71999	9.69369	9.81769	9.51377	9.77612	9.6384	9.66085		#N/A
MANSC1	ENSG00000281818	MANSC1	-0.359637	0.176009		8.06354	7.87316	9.32195	8.95478	9.16138	8.44698	8.94849	8.70708	8.31916	8.28853	8.70996	8.15494		#N/A
FBXO30-DT	ENSG00000235652	FBXO30-DT	-0.847553	0.176009		4.63254	4.41659	5.18475	4.20762	3.86308	4.24336	5.59387	4.43637	5.12669	4.80473	5.78487	4.51081		#N/A
GLS	ENSG00000115419	GLS	0.505739	0.176104		10.6113	10.8317	9.63172	10.7079	9.80763	10.2681	9.43942	9.91586	10.1473	10.455	9.61619	10.082		#N/A
PRIMPOL	ENSG00000164306	PRIMPOL	-0.603331	0.176565		6.05342	6.28996	6.86231	5.49645	6.67918	6.3711	7.16342	6.69667	7.17927	6.14007	6.92706	6.43812		#N/A
ENSG00000286511	ENSG00000286511	ENSG00000286511	-0.777189	0.176565		4.5637	4.04746	4.74688	3.63007	4.58076	4.43671	4.54721	3.9517	4.62204	3.73482	5.34071	4.73103		#N/A
DNTTIP2	ENSG00000067334	DNTTIP2	0.213012	0.176566		10.0784	10.168	10.0076	10.1967	9.82078	9.88864	9.92082	10.218	9.89333	10.0826	9.7703	10.1951		#N/A
ZSCAN29	ENSG00000140265	ZSCAN29	0.220625	0.176804		9.60436	10.0043	9.62129	9.82112	9.59664	9.75442	9.78857	9.89194	9.42638	9.60181	9.61321	9.86948		#N/A
GPR37	ENSG00000170775	GPR37	0.559847	0.176834		7.63065	7.99812	7.16953	7.99249	7.38335	7.6408	6.94309	7.18199	7.51371	8.23219	6.51819	7.42827		#N/A
KIF9	ENSG00000088727	KIF9	0.645211	0.176834		5.92208	6.0798	5.48995	6.22609	5.00615	6.22159	5.06745	5.71536	5.4152	5.90403	4.86598	5.20539		#N/A
FAM83H	ENSG00000273889	FAM83H	0.353482	0.176927		11.0563	11.3095	10.8564	11.2961	10.5797	11.0077	10.3864	10.6665	10.6289	10.9218	10.5967	11.0048		#N/A
RNF8	ENSG00000112130	RNF8	-0.259209	0.177691		8.69458	8.64842	8.69142	8.50933	8.92782	8.62627	9.02715	8.52204	8.60361	8.21292	8.48333	8.35456		#N/A
OVOL2	ENSG00000125850	OVOL2	-0.74225	0.177691		5.43622	4.95414	6.57596	5.78263	6.42736	5.19362	6.51841	5.87574	6.64744	6.34286	6.95564	6.18212		#N/A
PAAF1	ENSG00000175575	PAAF1	-0.216797	0.177943		8.51935	8.37854	8.62687	8.49721	8.89267	8.51819	8.85094	8.62561	8.48058	8.30076	8.34253	8.10657		#N/A
CABIN1	ENSG00000281670	CABIN1	-0.249868	0.177977		10.8222	10.4365	10.6333	10.2821	10.7436	10.6015	10.7221	10.5379	10.5908	10.4482	10.4123	10.113		#N/A
PMPCA	ENSG00000165688	PMPCA	0.21851	0.178082		9.76247	9.9561	9.5332	9.83081	9.48306	9.81659	9.59212	9.76598	9.43715	9.619	9.76223	9.8839		#N/A
ENSG00000268218	ENSG00000268218	ENSG00000268218	0.72826	0.178503		4.69825	5.27473	5.48995	5.82203	4.64976	5.99457	4.94313	5.04982	4.46249	5.62168	5.53	6.08559		#N/A
TRAF3IP2	ENSG00000056972	TRAF3IP2	-0.499643	0.179277		8.80682	8.62747	8.41383	7.81838	8.16848	7.31135	7.91394	7.39365	8.12854	7.99698	8.39912	7.58479		#N/A
YTHDF2	ENSG00000198492	YTHDF2	0.212544	0.179392		10.5985	10.6428	10.7463	10.9785	10.3682	10.8199	10.656	10.857	10.4552	10.7043	10.6783	10.798		#N/A
ENSG00000268947	ENSG00000268947	ENSG00000268947	0.713825	0.180566		4.15945	4.99833	4.46533	5.04234	3.30185	4.52446	4.23003	4.54944	4.93736	4.99732	4.39538	5.27708		#N/A
ABCC1	ENSG00000278183	ABCC1	-0.205023	0.180628		10.363	10.1449	10.6255	10.151	10.3554	10.1864	10.1929	10.1524	10.1765	10.063	10.2293	10.0555		#N/A
PIF1	ENSG00000140451	PIF1	-0.742777	0.180628		6.84497	6.48892	8.25203	7.29596	8.19181	7.31135	8.48162	7.84508	7.98911	7.25754	8.70435	8.00993		#N/A
PARP2	ENSG00000129484	PARP2	-0.298609	0.180628		8.98192	8.53299	8.83067	8.54802	8.88553	8.46373	9.13528	8.83527	8.87054	8.53095	9.07815	9.02496		#N/A
CDK19	ENSG00000155111	CDK19	-0.360745	0.180628		8.8652	8.72274	8.82159	8.25247	8.82715	8.35423	9.109	8.68559	8.67814	8.395	8.38868	8.08675		#N/A
MCRIP2	ENSG00000172366	MCRIP2	-0.441604	0.18066		7.40328	7.17771	7.27084	6.31161	7.16502	6.9002	7.64796	7.12839	7.34857	7.23223	7.9129	7.42037		#N/A
ARHGEF16	ENSG00000130762	ARHGEF16	0.21292	0.181185		9.27355	9.20284	9.17997	9.47228	9.04772	9.55005	9.06493	9.42252	9.12487	9.15683	9.08464	9.2398		#N/A
SECISBP2L	ENSG00000138593	SECISBP2L	0.380354	0.181385		10.3807	10.6031	10.6176	11.4419	10.4369	10.609	10.3056	10.4953	10.3433	10.6635	10.3976	10.7602		#N/A
ZFP62	ENSG00000196670	ZFP62	-0.438096	0.18168		8.75758	8.80591	9.80603	9.37796	9.59008	8.97673	9.75661	9.22816	9.59617	9.25434	9.88124	9.28832		#N/A
DLG5	ENSG00000274429	DLG5	-0.257978	0.181821		11.1266	11.0317	11.8347	11.4196	11.404	11.1421	11.4688	11.2907	11.272	11.0764	11.5254	11.1757		#N/A
MED6	ENSG00000133997	MED6	0.280969	0.181896		7.62221	8.25648	8.2016	8.21226	7.94649	8.2551	8.1895	8.42906	7.89849	8.38929	7.94652	7.95087		#N/A
SNX9	ENSG00000130340	SNX9	0.482042	0.182248		10.3819	10.6244	9.81215	10.5386	9.92537	10.5824	9.44707	9.94973	9.71157	10.2096	9.57993	9.8118		#N/A
EPS8L1	ENSG00000131037	EPS8L1	0.583242	0.182364		9.12617	9.30973	8.67471	9.26815	8.08374	9.13147	7.75044	8.50812	9.05666	9.39213	8.02504	8.79398		#N/A
NUP50	ENSG00000093000	NUP50	0.1529	0.182688		10.8782	11.0723	11.0115	11.1211	10.938	11.0275	10.9498	10.9717	10.8138	11.145	11.0027	11.174		#N/A
BAHCC1	ENSG00000266074	BAHCC1	-0.751447	0.182688		8.6579	7.80014	9.68942	8.628	9.81328	9.05617	10.163	9.77908	9.43536	8.48347	10.1796	9.43657		#N/A
PIGW	ENSG00000275600	PIGW	0.348838	0.182688		7.30125	7.34106	7.08099	7.79877	7.37318	7.63095	7.3299	7.58485	7.20471	7.42327	7.51865	7.99406		#N/A
NOP14-AS1	ENSG00000249673	NOP14-AS1	0.317338	0.18271		7.20282	7.41628	7.21646	7.63146	6.94932	7.38354	7.41037	7.30786	6.81095	7.41205	7.21406	7.54903		#N/A
ZNF22-AS1	ENSG00000165511	ZNF22-AS1	-0.497937	0.18271		5.68337	5.27473	5.71583	5.31507	5.7023	5.02333	5.84614	5.26377	6.1328	5.31917	6.12399	6.08559		#N/A
POC1B	ENSG00000139323	POC1B	-0.285579	0.182845		8.96534	8.45585	8.28323	8.35002	8.51673	8.02622	8.39726	8.32966	8.63825	8.53095	8.75943	8.1406		#N/A
ZNF106	ENSG00000103994	ZNF106	-0.148816	0.183317		10.3452	10.2841	10.6784	10.4783	10.5484	10.4146	10.6141	10.4614	10.5665	10.3486	10.5357	10.4235		#N/A
DEAF1	ENSG00000282712	DEAF1	-0.257043	0.183317		8.41573	8.10303	8.76273	8.45085	8.96891	8.67022	8.70543	8.6159	8.51827	8.30683	8.7702	8.48138		#N/A
ENSG00000264456	ENSG00000264456	ENSG00000264456	-0.733183	0.183317		4.06298	3.42622	4.84573	4.37589	4.26609	4.24336	4.80707	4.03173	4.67153	3.9977	4.39538	3.63911		#N/A
FSBP	ENSG00000265817	FSBP	-0.266797	0.183404		7.48932	7.24345	7.80695	7.46102	7.59934	7.45228	7.58	7.10083	7.43708	7.31894	7.36376	7.14183		#N/A
PSEN1	ENSG00000080815	PSEN1	0.30926	0.183551		10.7052	10.9713	10.4618	10.9872	10.5176	10.835	10.3874	10.5583	10.4375	10.6611	10.149	10.4721		#N/A
ENSG00000267317	ENSG00000267317	ENSG00000267317	-0.459601	0.183618		5.54736	5.12332	5.32841	5.00859	5.29171	5.24619	5.32163	5.01086	5.94433	5.36647	5.76347	5.09069		#N/A
CCNB2	ENSG00000157456	CCNB2	-0.322661	0.183813		9.17025	9.06679	9.79679	9.48154	9.96821	9.56565	10.0062	9.64557	9.52727	9.22257	9.90341	9.52757		#N/A
DCAKD	ENSG00000172992	DCAKD	-0.369706	0.18468		9.11117	8.55904	9.47455	8.92343	9.79816	9.32108	9.671	9.38111	9.2745	9.15346	9.58452	9.29697		#N/A
TRIM37	ENSG00000108395	TRIM37	-0.270987	0.184721		9.13805	8.91656	9.67773	9.30685	9.55678	9.00751	9.58174	9.46818	9.17935	9.19336	9.53329	9.14478		#N/A
ZNF589	ENSG00000164048	ZNF589	-0.45245	0.184786		8.84721	8.57372	9.5406	9.15701	9.02842	8.51283	9.25778	8.7726	9.15563	8.61658	9.68893	9.19885		#N/A
PDE12	ENSG00000174840	PDE12	0.250528	0.184836		8.63291	8.67589	8.27882	8.77073	8.81217	8.91718	8.44771	8.74021	8.60679	8.87552	8.55669	8.87996		#N/A
ATN1	ENSG00000111676	ATN1	-0.263057	0.184981		12.0686	11.8627	12.0078	11.4874	12.2225	12.0275	12.1861	12.0758	12.1029	11.8032	11.9601	11.65		#N/A
SMAD6	ENSG00000137834	SMAD6	-0.458534	0.185181		8.83265	8.70285	9.81368	8.93919	9.4301	9.09968	9.3966	9.12019	9.54895	9.40635	9.96797	9.16146		#N/A
RNF216P1	ENSG00000196204	RNF216P1	0.363614	0.185181		8.38614	8.66565	8.01773	8.44139	7.58179	8.09232	7.75044	7.89942	7.96946	8.28853	7.83299	8.29104		#N/A
TENM3-AS1	ENSG00000177822	TENM3-AS1	0.721201	0.185181		6.38804	6.40933	6.18094	7.04442	5.88511	6.91651	5.18191	6.09649	6.15036	6.58203	4.94413	6.08559		#N/A
ENSG00000280433	ENSG00000280433	ENSG00000280433	0.534486	0.185181		5.35706	5.95081	5.29381	5.31507	4.95254	5.60939	4.80707	6.00031	5.26208	5.87162	5.53	5.31163		#N/A
KCNJ11	ENSG00000187486	KCNJ11	-1.03488	0.185181		3.45087	3.55015	4.58462	4.42788	5.33426	3.01338	5.06745	4.10755	4.62204	4.31948	5.36932	4.17778		#N/A
AGO2	ENSG00000123908	AGO2	0.149147	0.185234		10.8268	10.922	10.8556	11.147	11.0168	11.1932	10.8991	11.0668	10.7007	10.8288	10.8663	10.9023		#N/A
CCP110	ENSG00000103540	CCP110	-0.397582	0.185242		8.79185	8.30567	9.28058	8.73506	9.51809	8.79015	9.52865	9.23663	9.2785	8.97805	9.21843	9.09606		#N/A
ENSG00000238178	ENSG00000238178	ENSG00000238178	-1.91313	0.185242		3.59583	2.78507	3.85531	2.25154	4.58076	2.42174	2	3.21651	3.92331	3.22064	5.84722	4.01957		#N/A
MED26	ENSG00000105085	MED26	0.482289	0.185242		5.83712	6.28996	5.97798	5.82203	5.20266	6.34724	5.59387	6.35165	5.92405	5.87162	5.4519	6.08559		#N/A
USP14	ENSG00000101557	USP14	0.229985	0.185306		10.6647	10.8709	10.2726	10.6953	10.6211	10.7397	10.4295	10.6704	10.5004	10.7008	10.3237	10.5273		#N/A
OTUD7B	ENSG00000264522	OTUD7B	0.181502	0.185306		10.017	10.0029	9.81368	10.1187	9.83381	9.90508	9.72392	10.0965	9.81291	10.0862	9.85492	9.91794		#N/A
LYPD3	ENSG00000124466	LYPD3	1.20247	0.185841		7.59659	7.9872	7.38207	9.09203	5.96851	7.72656	5.18191	6.02007	6.29948	6.83835	6.14068	7.57771		#N/A
PURG	ENSG00000172733	PURG	-0.834203	0.18643		5.35706	4.90855	5.66259	4.97403	6.75943	5.93176	7.23587	6.67191	5.55361	4.66039	6.1735	5.00883		#N/A
DIP2A	ENSG00000160305	DIP2A	-0.227209	0.186614		10.1883	9.82114	9.84239	9.59248	9.69379	9.81441	9.8345	9.52285	10.0547	9.7585	9.83583	9.59224		#N/A
ZSCAN21	ENSG00000166529	ZSCAN21	0.417005	0.186614		6.48431	6.78223	6.83851	7.25337	6.71182	6.9002	6.38139	6.49969	6.63502	7.18024	6.53091	7.27035		#N/A
BLOC1S6	ENSG00000104164	BLOC1S6	0.215652	0.187045		10.0754	10.1126	9.81825	10.1325	9.87762	9.7991	9.83304	10.1975	9.83208	10.0468	9.87252	10.2662		#N/A
ENSG00000258744	ENSG00000258744	ENSG00000258744	-0.626196	0.187045		6.48431	5.67942	6.68677	5.76253	5.63582	4.75963	6.57536	6.03955	6.29948	6.21949	6.15718	5.69861		#N/A
SLC7A11	ENSG00000151012	SLC7A11	0.514619	0.187145		7.04762	7.18729	7.00816	7.22426	7.17676	7.9648	7.6937	8.06547	6.86513	7.12631	6.1071	7.42827		#N/A
TMEM129	ENSG00000168936	TMEM129	-0.321089	0.18764		8.37111	8.25648	8.64414	8.21226	8.73885	8.04859	8.75558	8.5324	8.77188	8.4564	8.86366	8.69929		#N/A
RFX6	ENSG00000185002	RFX6	-1.01823	0.187985		4.87912	4.04746	5.74173	4.08344	5.88511	4.75963	4.65683	4.88724	6.25146	5.21966	6.83775	5.96053		#N/A
SLC25A40	ENSG00000075303	SLC25A40	-0.339131	0.188047		7.76703	7.59239	8.31808	7.84253	8.37618	7.83351	8.25197	8.24826	8.10171	7.91187	8.47018	7.8893		#N/A
TNKS2	ENSG00000107854	TNKS2	0.202545	0.188148		10.8323	11.0083	10.9102	11.1895	10.8025	11.0646	10.6781	10.9135	10.7881	10.9138	10.6296	10.7539		#N/A
SPAG5	ENSG00000076382	SPAG5	-0.390808	0.188432		9.2976	8.97025	9.73042	9.25202	9.98333	9.50491	10.2155	9.92243	9.72335	9.38641	9.92405	9.48846		#N/A
JMJD7-PLA2G4B	ENSG00000168970	JMJD7-PLA2G4B	-0.557675	0.188649		5.22954	4.86147	5.42749	5.10755	5.24787	4.68542	5.72552	5.29654	5.90349	5.49971	6.0375	5.16816		#N/A
SPACA9	ENSG00000165698	SPACA9	-0.640625	0.188706		5.68337	5.04121	5.63521	5.10755	5.37558	5.60939	6.4439	5.16076	4.97726	4.87182	5.28173	4.38666		#N/A
BOK	ENSG00000176720	BOK	0.90142	0.188833		9.43161	9.76148	8.30945	9.61789	7.94649	9.4044	6.97519	7.36304	8.88896	9.55154	8.00694	8.84205		#N/A
IER2	ENSG00000160888	IER2	-0.475783	0.188833		9.07452	9.11776	9.72394	8.96581	9.50185	9.27438	9.25342	8.70097	9.26446	8.93164	9.15821	7.86041		#N/A
ACYP1	ENSG00000119640	ACYP1	-0.437181	0.189443		6.42732	6.21703	6.86231	6.2407	7.26737	6.94859	6.85383	6.85903	7.01644	6.24503	7.01116	6.43812		#N/A
ZNF74	ENSG00000185252	ZNF74	-0.261969	0.18975		7.54395	7.46433	8.54832	8.45398	8.84932	8.49665	8.9962	8.69791	7.71003	7.37783	7.82784	7.47475		#N/A
LIPT2	ENSG00000175536	LIPT2	-0.747886	0.18975		5.27331	5.23834	6.57596	5.61333	6.23868	5.8993	6.61665	5.89727	6.2018	6.16703	7.31311	5.79944		#N/A
CCDC14	ENSG00000175455	CCDC14	-0.334258	0.189796		11.1678	10.8522	11.3461	11.1196	11.4573	10.9603	11.6529	11.2968	11.5849	11.1322	11.7059	11.5226		#N/A
LAMTOR5-AS1	ENSG00000224699	LAMTOR5-AS1	-0.883759	0.19018		4.69825	3.29064	5.39521	4.74726	4.58076	3.60277	5.38672	4.88724	4.57079	4.11312	5.39738	4.5691		#N/A
E4F1	ENSG00000167967	E4F1	0.236588	0.190426		8.87233	9.17904	8.70135	8.91889	8.73488	8.82945	8.54716	8.79283	8.60679	8.82985	8.56289	8.85674		#N/A
RIOK1	ENSG00000124784	RIOK1	0.367999	0.19044		7.99982	8.4479	8.51116	8.95034	8.60625	8.80775	8.62678	9.00843	8.449	8.74739	8.75402	9.17559		#N/A
ZNF778	ENSG00000170100	ZNF778	0.366933	0.19044		7.96019	8.63449	7.94155	8.42869	7.6423	8.01868	8.1098	8.17525	7.60569	8.30076	8.30969	8.23813		#N/A
MPI	ENSG00000178802	MPI	-0.224563	0.19044		8.3041	8.20555	8.77532	8.39969	8.48875	8.34823	8.70543	8.43275	8.45254	8.38355	8.65292	8.32948		#N/A
FBXO33	ENSG00000165355	FBXO33	0.340088	0.19044		8.33541	8.91079	8.30076	8.60277	8.64479	8.44698	7.90841	8.49407	8.15488	8.54129	8.10377	8.51142		#N/A
SMARCE1	ENSG00000073584	SMARCE1	0.260093	0.19044		7.69644	7.83711	7.93595	8.23433	7.78717	8.07789	7.8169	8.06547	7.99398	8.27	7.69853	7.98339		#N/A
SERTAD4-AS1	ENSG00000280963	SERTAD4-AS1	1.06364	0.19044		5.43622	5.65202	3.75714	5.00859	3.97486	5.39331	2.54738	3.77696	4.62204	5.49971	4.55334	4.82969		#N/A
DNALI1	ENSG00000163879	DNALI1	0.383583	0.190832		8.32505	8.43188	8.62687	9.28587	8.95193	9.37519	9.35248	9.80636	8.39478	8.54643	8.49636	8.9611		#N/A
KCNK1	ENSG00000135750	KCNK1	0.534079	0.191164		8.42061	8.57372	7.62409	8.05169	7.82496	8.45817	7.12578	8.05114	7.58647	8.10551	7.21406	7.93987		#N/A
RNFT2	ENSG00000135119	RNFT2	-0.491128	0.191164		6.50281	6.01675	6.92017	5.86037	6.64579	6.05476	6.66993	6.4127	6.60985	6.43448	7.18217	6.86772		#N/A
FAM102A	ENSG00000167106	FAM102A	0.291213	0.19161		9.38997	9.61484	9.04866	9.26993	9.35461	9.64855	8.96457	9.31468	9.29241	9.67878	9.02744	9.28397		#N/A
VPS13C	ENSG00000129003	VPS13C	-0.241407	0.191614		10.0378	9.75345	10.1401	9.78295	10.1339	9.713	9.90146	9.72595	10.2072	10.1331	9.8899	9.75801		#N/A
ERVMER34-1	ENSG00000226887	ERVMER34-1	-0.700246	0.191748		5.47423	5.04121	6.44018	4.74726	6.28279	5.86609	6.4439	5.91847	6.1328	5.41226	6.55602	6.16333		#N/A
PTTG1	ENSG00000164611	PTTG1	-0.306873	0.19249		9.24635	8.97025	9.60375	9.23934	10.0115	9.61145	9.80504	9.59378	9.25231	9.12967	9.71842	9.30127		#N/A
STK11	ENSG00000118046	STK11	-0.174491	0.19249		9.75862	9.65163	9.77029	9.54177	9.66699	9.56565	9.72077	9.47177	9.76527	9.46456	9.52059	9.46755		STK11
HHIPL1	ENSG00000182218	HHIPL1	-0.826506	0.19249		5.31579	4.4803	5.76717	4.74726	5.52998	4.02002	5.32163	4.54944	5.6799	5.11277	6.35612	6.16333		#N/A
ENSG00000260077	ENSG00000260077	ENSG00000260077	-0.725465	0.19249		5.47423	4.54132	4.64076	4.26592	4.35142	4.60719	5.70013	4.84356	5.92405	4.99732	5.31153	4.78121		#N/A
DUSP19	ENSG00000162999	DUSP19	-1.28239	0.19249		3.45087	2.56766	4.52621	3.79753	5.6014	4.02002	5.53766	3.46734	3.65462	4.21999	5.31153	4.32034		#N/A
ENSG00000260276	ENSG00000260276	ENSG00000260276	0.59602	0.192609		4.98821	4.81281	4.74688	5.5206	4.64976	5.48366	4.60306	5.32858	4.40513	5.54152	4.94413	4.73103		#N/A
THADA	ENSG00000115970	THADA	-0.267351	0.192686		8.63711	8.27905	9.03563	8.7247	8.89977	8.56032	8.86243	8.62238	8.87318	8.65041	8.97953	8.83315		#N/A
ANXA9	ENSG00000143412	ANXA9	-0.718185	0.192886		7.51689	6.8681	9.20812	8.35338	8.03298	7.14134	8.31604	7.74179	8.28777	7.61171	8.70154	8.10164		#N/A
ZNF594-DT	ENSG00000261879	ZNF594-DT	-0.895471	0.192937		4.63254	3.77003	5.18475	4.42788	3.97486	4.24336	5.84614	4.70398	5.19597	4.80473	5.69731	4.5691		#N/A
KMT5C	ENSG00000133247	KMT5C	-0.246869	0.192939		8.58161	8.28352	8.54097	8.34665	8.87836	8.40713	8.53285	8.61266	8.50809	8.06307	8.57523	8.40743		#N/A
CDKN2B-AS1	ENSG00000240498	CDKN2B-AS1	0.868046	0.192943		4.63254	4.20661	4.03364	5.16995	4.35142	4.96178	3.5088	3.9517	4.62204	5.62168	4.50258	5.56177		#N/A
TGM1	ENSG00000285348	TGM1	-0.73529	0.193044		5.13779	5.27473	4.93824	4.57349	4.43199	3.23767	4.85386	3.86697	5.44396	4.73436	5.4249	4.25082		#N/A
PLK3	ENSG00000173846	PLK3	1.0866	0.193328		10.3668	10.7452	7.9019	9.81136	8.06492	9.65342	6.98574	8.51858	9.40093	9.69276	7.50582	8.72835		#N/A
GRB7	ENSG00000141738	GRB7	0.475223	0.19354		8.83265	9.14505	8.51116	9.24298	8.09616	8.82081	7.92494	8.5864	8.68719	8.54643	8.08232	8.62224		#N/A
FZD8	ENSG00000177283	FZD8	0.672398	0.19354		7.54395	8.39102	7.25294	7.38414	8.5121	9.09252	7.65458	8.3257	7.45132	8.12626	7.10771	7.99406		#N/A
NAA20	ENSG00000173418	NAA20	0.256474	0.193546		8.86877	8.9507	8.22933	8.71427	8.38632	8.7035	8.56836	8.64482	8.44545	8.7563	8.44016	8.73155		#N/A
IFT80	ENSG00000068885	IFT80	-0.224426	0.193546		7.93996	7.51084	8.10513	8.0224	8.11458	7.92504	8.2344	8.0415	8.05119	7.82142	8.0693	7.8487		#N/A
RORB	ENSG00000198963	RORB	-1.05544	0.193689		4.76109	4.86147	6.60447	4.82688	7.35263	6.22159	8.06576	7.21664	5.32529	3.87224	6.39837	5.24168		#N/A
SENP2	ENSG00000163904	SENP2	0.230504	0.193943		9.93591	9.93636	9.88804	10.1806	9.67736	9.84456	9.92904	10.1138	9.80045	10.1416	9.58299	9.97294		#N/A
SPATA2	ENSG00000158480	SPATA2	0.283275	0.194387		7.64738	7.9651	7.82524	8.09253	7.94649	8.28052	7.91394	8.37639	7.88282	7.59195	7.65271	8.15969		#N/A
TRO	ENSG00000067445	TRO	-0.187342	0.194613		10.3819	10.1704	10.3346	10.1635	10.6275	10.387	10.5961	10.4202	10.4294	10.2274	10.4429	10.3266		#N/A
OSBP	ENSG00000110048	OSBP	0.211311	0.194836		10.3491	10.5137	10.2412	10.4604	10.0582	10.3409	10.0583	10.204	10.1396	10.356	10.0196	10.254		#N/A
TP53BP2	ENSG00000143514	TP53BP2	0.485624	0.195384		11.4452	11.5126	10.3703	11.0146	10.3214	10.9335	10.3491	11	10.5583	10.8673	10.1324	10.9889		#N/A
TLR5	ENSG00000187554	TLR5	-0.960875	0.195559		4.06298	4.41659	4.52621	3.33562	4.83894	3.01338	4.94313	4.54944	4.62204	4.31948	5.18848	3.52595		#N/A
DNAJC9	ENSG00000213551	DNAJC9	0.205619	0.195592		8.21151	8.4359	8.24299	8.48192	8.21476	8.59113	8.47416	8.60286	8.22285	8.3189	8.36756	8.53719		#N/A
GPC1	ENSG00000063660	GPC1	0.443109	0.19581		11.3959	11.6022	10.7997	11.2638	10.9233	11.7692	10.7299	11.1782	11.0231	11.2048	10.4208	10.9476		#N/A
KMT2E	ENSG00000005483	KMT2E	-0.270634	0.195871		10.7553	10.635	11.0848	10.588	10.7096	10.3972	11.0871	10.874	10.7584	10.6504	11.0707	10.7141		#N/A
CDKN1B	ENSG00000111276	CDKN1B	-0.429071	0.195871		8.23383	8.13802	8.92412	8.00966	8.83458	8.35423	9.14942	8.80427	8.60361	8.42882	9.07381	8.5481		#N/A
LRRC8B	ENSG00000197147	LRRC8B	0.406713	0.195871		8.03203	8.15276	8.07488	8.75809	8.69463	8.96893	8.74941	9.23874	8.0371	8.57691	8.48333	8.8152		#N/A
ARMCX1	ENSG00000126947	ARMCX1	-0.322515	0.195871		7.72824	7.80014	8.42586	7.97949	7.98038	7.57038	8.20762	7.71174	7.87227	7.71581	8.23003	7.81296		#N/A
MRPL21	ENSG00000197345	MRPL21	0.222095	0.195871		7.96687	8.16735	7.71841	8.03921	7.81748	8.10661	7.98923	8.20576	7.89849	7.91982	7.80708	8.05651		#N/A
SLC25A28	ENSG00000155287	SLC25A28	0.230172	0.195871		7.87041	8.12313	8.06978	8.05169	7.86178	8.37208	8.02545	8.13506	8.08811	8.29466	8.01149	8.34207		#N/A
FAM216A	ENSG00000204856	FAM216A	-0.56048	0.195871		6.90185	6.50433	6.90878	6.40537	7.65914	6.70742	7.47914	6.81448	6.82195	6.31902	7.58724	7.33056		#N/A
ENSG00000255142	ENSG00000255142	ENSG00000255142	-0.855254	0.195871		3.9596	4.20661	4.64076	4.01709	4.35142	4.02002	4.75871	3.21651	4.07814	2.99847	4.50258	3.63911		#N/A
ZNF815P	ENSG00000235944	ZNF815P	-0.88618	0.196176		4.5637	3.55015	4.52621	4.82688	4.26609	4.24336	4.98577	3.9517	4.81056	2.99847	4.21798	3.40316		#N/A
ARL8B	ENSG00000134108	ARL8B	0.325804	0.196266		10.1725	10.4633	9.96976	10.3802	9.71407	10.1712	9.71444	10.0408	9.90372	10.2113	9.68751	9.79968		#N/A
GUCY1B1	ENSG00000061918	GUCY1B1	-0.768976	0.196266		6.7552	6.48892	8.21553	7.19455	8.89977	7.80751	8.48905	7.80579	8.62261	7.90388	8.43678	7.90635		#N/A
STXBP4	ENSG00000166263	STXBP4	-0.391619	0.196266		7.62221	7.4244	7.74427	7.12538	7.49069	6.72605	7.87477	7.68724	7.44422	7.09856	7.64688	7.28781		#N/A
IL6R	ENSG00000160712	IL6R	1.54882	0.196266		6.42732	6.75673	3.27987	4.90233	3.30185	5.99457	2.54738	4.03173	4.40513	5.0562	4.21798	4.32034		#N/A
CMBL	ENSG00000164237	CMBL	-0.530813	0.196626		8.14237	7.90252	7.32324	6.39234	7.65075	6.72605	7.11622	6.67191	7.65574	7.25754	7.17408	7.02175		#N/A
CNTROB	ENSG00000170037	CNTROB	-0.300802	0.19695		9.19037	8.95911	9.39925	9.09605	9.49951	9.19303	9.63629	9.46818	9.41189	9.01191	9.74049	9.36023		#N/A
TMCC2	ENSG00000133069	TMCC2	0.459218	0.197163		7.79733	7.81257	7.08099	7.64251	6.50391	7.88415	7.3867	7.80579	7.35616	7.65996	7.17408	7.36387		#N/A
CLPTM1L	ENSG00000274811	CLPTM1L	0.161319	0.197611		9.89797	9.98659	9.85876	10.0623	9.91138	10.1695	9.80206	10.1023	9.91789	9.84035	9.8936	10.0707		#N/A
DRAXIN	ENSG00000162490	DRAXIN	-0.458835	0.197828		8.67023	8.35749	8.84866	8.34665	8.84565	8.49665	9.25995	9.0642	9.13593	8.64082	9.63693	8.8272		#N/A
USP42	ENSG00000106346	USP42	0.355624	0.197898		8.89001	8.87864	9.23116	9.96113	9.56573	9.65828	9.41036	9.73045	8.96288	9.46998	9.31351	9.71187		#N/A
ZNF775	ENSG00000196456	ZNF775	-0.483883	0.197898		6.64289	5.88171	7.68543	6.71885	7.27831	6.94859	6.97519	6.94422	5.92405	6.11259	6.97439	6.32428		#N/A
ZNF444	ENSG00000167685	ZNF444	-0.261058	0.198719		9.25729	9.26747	9.36425	8.78076	9.33641	9.13844	9.49399	9.25341	9.48465	9.25748	9.68751	9.37255		#N/A
RYK	ENSG00000163785	RYK	-0.176115	0.198817		10.7251	10.7533	11.1713	10.8546	11.1642	10.8057	11.0612	10.9755	10.9264	10.8497	11.0348	10.8056		#N/A
ZC3H15	ENSG00000065548	ZC3H15	0.228445	0.198949		10.4383	10.4183	10.4001	10.6713	10.2689	10.3181	10.2099	10.5481	10.0157	10.3792	10.1542	10.5218		#N/A
ZBED8	ENSG00000221886	ZBED8	-0.508818	0.198961		5.83712	5.97312	5.81675	5.87917	6.23868	5.24619	6.33267	6.03955	6.55816	5.73413	6.7205	5.79944		#N/A
EMD	ENSG00000102119	EMD	0.259345	0.199247		8.9885	8.98953	9.19411	9.54766	9.00885	9.42735	8.86243	9.18506	9.03319	9.02302	8.90577	9.33105		#N/A
CSPG4P10	ENSG00000282457	CSPG4P10	-0.541058	0.199247		7.19146	6.83192	7.96373	7.2819	7.52782	7.39522	8.46288	7.80008	7.15338	6.49957	7.96538	7.38836		#N/A
INTS3	ENSG00000262826	INTS3	-0.283781	0.199418		10.4692	10.1025	10.8392	10.4581	10.7796	10.7556	11.0175	10.7442	10.8255	10.5074	10.9205	10.5761		#N/A
WDTC1	ENSG00000142784	WDTC1	-0.170369	0.199418		9.84456	9.69591	10.1056	9.96003	10.19	10.0433	9.97077	9.92506	10.0205	9.84035	10.0026	9.66587		#N/A
UBE2W	ENSG00000104343	UBE2W	0.343409	0.199418		8.7843	8.78714	8.1445	8.5971	8.30844	8.51283	8.26934	8.62238	8.02287	8.72034	8.01602	8.44682		#N/A
IRAK2	ENSG00000134070	IRAK2	0.68233	0.199418		6.80078	7.34106	5.71583	5.84133	5.73442	6.9002	4.85386	6.13323	6.0227	6.14007	6.41219	6.89076		#N/A
IFIT3	ENSG00000119917	IFIT3	0.938142	0.199418		4.5637	4.54132	3.27987	4.97403	3.74189	4.52446	3.72559	4.10755	4.62204	5.83845	4.21798	4.10084		#N/A
FERMT3	ENSG00000149781	FERMT3	0.753836	0.199418		3.2897	4.4803	3.75714	4.78762	3.97486	4.68542	4.42857	5.16076	4.46249	4.87182	4.44998	4.45007		#N/A
HIF3A	ENSG00000124440	HIF3A	-0.886797	0.199854		6.52108	5.73271	7.00816	5.70047	7.56403	6.97997	8.20762	7.50298	6.86513	5.83845	7.99322	7.02175		#N/A
NR2F1	ENSG00000175745	NR2F1	-0.711971	0.200306		8.21151	8.33181	9.64893	7.66435	10.2866	9.27121	10.2747	9.49313	9.24416	8.83407	8.89351	8.36282		#N/A
ZNF468	ENSG00000204604	ZNF468	0.382956	0.200306		8.95865	9.03267	8.87815	8.92343	8.78175	9.22285	8.65017	9.30666	8.51488	8.53095	8.59656	9.49412		#N/A
SLC10A3	ENSG00000126903	SLC10A3	0.496556	0.200306		8.51479	8.54048	8.09512	8.83472	7.86178	8.71753	7.58695	7.81147	7.90884	8.36621	7.65271	8.25154		#N/A
KATNB1	ENSG00000140854	KATNB1	-0.200029	0.200306		8.50105	8.46375	8.39355	8.21226	8.5121	8.38386	8.44389	8.30572	8.57788	8.11246	8.54733	8.2867		#N/A
AIP	ENSG00000110711	AIP	-0.259297	0.200306		8.10652	7.86124	8.15417	7.6965	8.32962	8.14865	7.99967	7.95178	8.24345	7.72492	8.06494	7.97263		#N/A
GALK2	ENSG00000156958	GALK2	-0.304149	0.200306		7.12133	6.89172	7.16953	6.94087	7.26737	6.8837	6.88795	6.58174	7.08196	6.78712	6.92706	6.58659		#N/A
ENSG00000267632	ENSG00000267632	ENSG00000267632	0.774119	0.200306		5.08963	4.76244	4.6948	5.34242	3.86308	5.86609	4.42857	4.65428	4.97726	5.0562	4.78334	5.91631		#N/A
CDK5RAP2	ENSG00000136861	CDK5RAP2	-0.250128	0.200556		10.277	10.1944	10.9095	10.5453	10.8835	10.6511	10.9632	10.7722	10.5916	10.3353	10.8474	10.5116		#N/A
ZNF574	ENSG00000105732	ZNF574	0.294451	0.200556		8.28819	8.58463	7.93033	8.54214	8.24852	8.62627	8.32852	8.59301	7.92424	8.1802	8.23003	8.16915		#N/A
MTERF1	ENSG00000127989	MTERF1	0.390698	0.200556		7.52597	7.81257	7.87289	8.21966	7.19995	7.50716	7.27937	7.92584	7.71594	7.87146	7.6758	8.20635		#N/A
ESPL1	ENSG00000135476	ESPL1	-0.44883	0.200732		8.95193	8.57736	9.85283	9.17804	9.65445	9.3957	9.92767	9.55368	9.76953	9.12967	9.87626	9.52573		#N/A
RMDN3	ENSG00000137824	RMDN3	0.227925	0.201051		8.58161	8.74236	8.39355	8.74534	8.48403	8.29931	8.24321	8.64164	8.50809	8.86321	8.46688	8.67958		#N/A
SAP30-DT	ENSG00000272870	SAP30-DT	-1.1022	0.201051		3.45087	3.29064	3.6518	3.79753	4.07861	2.74768	4.75871	3.9517	4.0028	2.73574	4.64978	3.40316		#N/A
EDEM1	ENSG00000134109	EDEM1	0.675933	0.201347		10.547	10.8302	9.40939	10.3358	9.14055	10.0209	8.70543	9.50018	9.63723	10.2369	8.89597	9.64061		#N/A
ZNF75D	ENSG00000186376	ZNF75D	-0.343	0.201347		7.68027	7.36657	8.28323	7.85682	8.07122	7.77209	8.27794	7.88871	8.36876	7.98188	8.01602	7.8487		#N/A
RCSD1	ENSG00000198771	RCSD1	-1.29891	0.201696		5.65055	4.99833	9.47069	7.84253	7.8324	6.08394	6.92129	5.80918	7.59291	6.60193	8.35331	7.37208		#N/A
ACTR6	ENSG00000075089	ACTR6	-0.333766	0.201696		7.70445	7.30632	8.15899	7.97949	8.18601	7.70794	8.25197	7.91004	8.16355	7.95118	8.2609	7.87781		#N/A
JDP2	ENSG00000140044	JDP2	0.305975	0.201779		8.904	8.77449	9.01188	9.15894	8.92434	9.22939	8.81887	9.34632	8.93781	9.12624	8.92758	9.59224		#N/A
ZNF18	ENSG00000154957	ZNF18	-0.401488	0.201779		7.04762	6.50433	6.94267	6.64388	6.75943	6.3711	6.84227	6.3041	6.37611	5.90403	6.42587	6.30726		#N/A
ENSG00000259668	ENSG00000259668	ENSG00000259668	-0.80763	0.201779		4.87912	3.42622	4.6948	4.42788	4.89685	5.02333	5.25346	4.65428	5.2294	4.11312	5.76347	4.78121		#N/A
LEMD3	ENSG00000174106	LEMD3	0.203707	0.201928		9.15862	9.325	9.14158	9.28587	9.42026	9.52898	9.41817	9.56549	9.07287	9.43713	9.09538	9.3868		#N/A
SOS1	ENSG00000115904	SOS1	-0.241791	0.202381		10.8738	10.7066	11.3152	10.9813	11.0177	10.6978	10.8872	10.7104	11.131	10.955	11.0067	10.7484		#N/A
SKA3	ENSG00000165480	SKA3	-0.464047	0.202381		8.15997	7.79389	8.93819	8.28455	9.08557	8.61632	9.23587	8.94008	8.63513	8.13312	9.12504	8.63594		#N/A
GPATCH8	ENSG00000186566	GPATCH8	0.125958	0.202415		10.9201	11.0089	11.0021	11.1032	11.0427	11.1043	11.0182	11.2567	10.9226	11.0976	11.036	11.1208		#N/A
HOXB13	ENSG00000159184	HOXB13	-0.863594	0.202415		6.34766	5.16269	7.7822	6.10356	8.09616	6.78054	6.24761	6.00031	6.58424	6.58203	7.1982	6.78407		#N/A
MTRF1	ENSG00000120662	MTRF1	-0.340187	0.202415		7.2141	7.07828	7.38207	7.22426	7.4622	6.79825	7.60073	7.2998	7.41546	6.82147	7.64688	7.40445		#N/A
GLYCTK	ENSG00000168237	GLYCTK	0.686132	0.202415		5.74685	6.14022	5.5202	6.00431	5.00615	6.56982	5.59387	6.22119	5.05391	5.41226	6.29778	6.7212		#N/A
BBX	ENSG00000114439	BBX	-0.218351	0.202469		10.7417	10.4365	10.9045	10.8325	10.9215	10.5696	10.6982	10.5498	10.951	10.7507	10.7419	10.4967		#N/A
[truncated: 58,677 more rows]

## Sheet: deg_values_DESeq2_genotype
symbol	ensembl_ID	User_ID	DEL-WT_logFC	DEL-WT_adjPval	Processed data:	XV001_S100_L002	XV002_S101_L002	XV003_S102_L002	XV004_S103_L002	XV005_S104_L002	XV006_S105_L002	XV007_S106_L002	XV008_S107_L002	XV009_S108_L002	XV010_S109_L002	XV011_S110_L002	XV012_S111_L002		overlap
CRKL	ENSG00000099942	CRKL	-1.04089	5.45296e-38		9.73924	10.0178	11.0254	11.0325	10.8279	10.8846	10.8631	10.9365	9.8348	9.8487	9.90097	9.99437		#N/A
DGCR2	ENSG00000070413	DGCR2	-1.03534	2.12197e-21		9.227	9.41944	10.5714	10.1957	10.528	10.353	10.5111	10.3468	9.52223	9.22898	9.50778	9.40692		#N/A
RANBP1	ENSG00000099901	RANBP1	-1.10303	9.15912e-21		9.94101	10.0417	11.0573	11.0982	11.0885	11.0526	11.1126	11.1798	9.64344	9.88569	10.1178	10.2804		#N/A
HIRA	ENSG00000100084	HIRA	-1.38891	9.53436e-20		6.48431	6.45761	7.52316	7.59781	7.65914	7.75405	7.97342	7.91533	6.11503	6.52063	6.37034	6.45367		#N/A
CDC45	ENSG00000093009	CDC45	-1.41412	3.76869e-19		7.0093	7.08853	8.76273	8.59994	8.7546	8.50746	8.58232	8.82126	7.15338	7.33091	7.23753	7.75765		#N/A
SLC25A1	ENSG00000100075	SLC25A1	-0.924881	4.31297e-17		9.01775	8.88748	9.83939	9.80892	9.86498	9.8594	9.60072	9.50719	8.79719	8.79138	8.76752	8.72515		#N/A
TXNRD2	ENSG00000184470	TXNRD2	-4.78985	8.63343e-16		3.59583	3.86855	6.23665	6.63285	7.38335	7.75405	7.29641	7.13746	2	3.41312	2	3.26893		#N/A
EHD3	ENSG00000013016	EHD3	1.06695	2.66899e-15		9.33422	9.34866	8.22015	8.49112	8.12067	8.35423	8.24321	7.94146	9.14033	9.3691	9.07815	9.47328		#N/A
COMT	ENSG00000093010	COMT	-1.93011	3.53124e-15		6.91573	6.21703	8.69805	8.7273	9.29123	9.31494	8.92128	9.00348	7.58647	7.34279	7.18217	7.08304		#N/A
RIPPLY3	ENSG00000183145	RIPPLY3	-2.19372	5.09692e-15		7.4131	7.02587	8.95766	8.7221	9.76744	9.45553	9.93585	9.90129	7.89849	7.34279	7.34947	6.92464		#N/A
DGCR6L	ENSG00000128185	DGCR6L	-1.30607	1.32784e-13		6.6261	6.62199	7.50815	7.68586	7.59934	7.9648	7.76887	7.63695	6.29948	6.73402	6.20559	6.0451		#N/A
ABCB4	ENSG00000005471	ABCB4	2.48836	6.06932e-13		7.93316	7.7298	6.32497	6.48115	5.41576	5.08235	5.67429	5.87574	8.09266	7.87146	8.87866	8.85674		#N/A
ZNF74	ENSG00000185252	ZNF74	-1.12498	7.01232e-13		7.54395	7.46433	8.54832	8.45398	8.84932	8.49665	8.9962	8.69791	7.71003	7.37783	7.82784	7.47475		#N/A
ZNF676	ENSG00000276219	ZNF676	23.3986	9.54215e-12		8.31984	8.28352	2	2	2	2	2	2	2	2	2	2		#N/A
RTL10	ENSG00000215012	RTL10	-1.12993	1.0798e-11		7.84162	8.1818	9.46681	9.63458	9.13755	9.20636	8.9962	9.2986	8.15052	8.48347	8.26851	8.13096		#N/A
MRPL40	ENSG00000185608	MRPL40	-1.03951	4.32656e-10		6.91573	6.71761	7.89037	7.77889	7.65075	7.42973	7.7065	8.00232	6.93772	6.54139	6.79621	6.49935		#N/A
KLHL22	ENSG00000099910	KLHL22	-1.03825	6.64659e-09		7.08495	6.74381	8.24752	8.12833	8.21476	8.48028	8.01004	7.97727	7.16206	7.52057	7.09063	7.30506		#N/A
ZNF662	ENSG00000182983	ZNF662	-2.71435	1.03303e-08		3.72754	4.28005	6.06262	6.03816	7.32125	7.31135	6.10015	5.26377	4.21794	4.11312	4.01567	4.32034		#N/A
ADAMTS2	ENSG00000283802	ADAMTS2	2.2281	1.67798e-08		7.14509	7.01515	4.46533	4.93862	5.73442	6.11254	4.85386	4.75202	7.85095	7.82988	6.88805	7.05272		#N/A
PCDHB16	ENSG00000272674	PCDHB16	-1.58471	5.25904e-08		4.49141	4.59986	5.57885	6.2407	5.85621	5.8993	6.08061	5.64076	4.62204	4.87182	4.33864	4.01957		#N/A
SNAP29	ENSG00000099940	SNAP29	-0.851028	6.38692e-08		8.21712	8.52545	9.01188	9.09605	8.94165	8.98835	8.79508	8.96832	8.09266	8.04138	7.99781	7.78864		#N/A
PI4KA	ENSG00000241973	PI4KA	-0.955927	8.95156e-08		9.38249	9.41129	10.9894	10.794	10.6749	10.7579	10.5319	10.4847	9.97813	9.77831	9.94321	9.95119		#N/A
ADGRA2	ENSG00000020181	ADGRA2	2.51767	9.93614e-08		8.06976	7.48777	4.84573	4.42788	5.94124	5.56869	5.38672	5.29654	6.47698	6.52063	8.35689	8.2155		#N/A
ACTC1	ENSG00000159251	ACTC1	2.27123	1.15954e-07		9.8892	9.60058	7.32324	7.46102	7.55506	7.85906	7.13529	7.13746	10.2828	10.3604	8.15807	8.43119		#N/A
HS3ST2	ENSG00000122254	HS3ST2	3.8226	2.13685e-07		6.05342	6.14022	2.77744	3.09955	2.37082	3.43174	2	2.28764	4.67153	5.0562	4.82525	4.5691		#N/A
RXRG	ENSG00000143171	RXRG	-3.6712	2.33664e-07		2.3662	3.14098	5.54982	4.93862	6.6288	6.44043	6.26503	5.64076	2.28077	2	3.9414	3.74403		#N/A
KCNC4	ENSG00000116396	KCNC4	1.62297	3.47124e-07		7.88459	7.68993	6.45591	5.78263	6.92168	5.72504	6.02035	5.66606	8.23113	7.49951	7.63515	7.27911		#N/A
TGFBI	ENSG00000120708	TGFBI	3.23131	3.68845e-07		12.105	12.2384	8.11011	8.21966	7.76401	8.90497	6.87667	6.92339	10.7273	10.856	9.16639	9.25542		#N/A
ASXL1	ENSG00000171456	ASXL1	-0.356796	3.95358e-07		10.9398	10.9644	11.3928	11.3285	11.1737	11.312	11.3682	11.2759	10.9802	10.8908	11.0191	10.9254		#N/A
MYL7	ENSG00000106631	MYL7	2.81705	3.95358e-07		6.36799	6.62199	3.6518	4.37589	3.60958	4.75963	2.75886	3.68095	6.96775	6.78712	5.12278	5.5902		#N/A
LUZP2	ENSG00000187398	LUZP2	-1.17415	6.05545e-07		6.80078	6.6774	7.53061	7.20203	7.57294	7.68907	7.56602	7.74773	5.92405	6.08458	6.14068	6.68212		#N/A
CTNND2	ENSG00000169862	CTNND2	-1.13416	6.98529e-07		7.53499	7.32379	9.00922	8.75809	8.74674	8.63615	9.3484	9.21964	8.06051	7.95892	8.10377	7.98873		#N/A
BACE2	ENSG00000182240	BACE2	1.36512	6.98529e-07		8.89352	8.86677	7.18848	7.72795	7.00305	7.35987	7.8169	7.66859	9.11819	9.28544	8.14985	8.42726		#N/A
THAP7	ENSG00000184436	THAP7	-1.23502	6.98529e-07		6.52108	6.53466	8.01242	7.41667	7.87625	7.84208	8.26934	8.10762	6.31513	6.83835	6.75343	7.27911		#N/A
PIEZO2	ENSG00000154864	PIEZO2	-1.03427	7.61673e-07		10.4633	10.2696	11.8463	11.8324	11.7727	11.5983	12.1352	12.043	11.1115	11.0175	11.0581	10.9701		#N/A
NID2	ENSG00000087303	NID2	2.17728	8.6785e-07		7.78982	8.30127	6.64621	7.58069	7.08007	7.44105	6.36533	7.09152	9.78648	10.034	9.09752	9.24204		#N/A
PMP22	ENSG00000109099	PMP22	2.46733	9.43532e-07		6.07831	6.01675	3.53815	3.09955	3.30185	4.43671	3.25356	3.46734	4.71937	5.36647	5.67457	4.96609		#N/A
CDH4	ENSG00000280641	CDH4	2.59192	1.14728e-06		8.62871	8.59546	5.63521	5.76253	5.24787	5.76161	4.94313	5.29654	7.98422	8.26376	6.14068	6.16333		#N/A
CNTN4	ENSG00000144619	CNTN4	8.36073	1.16146e-06		3.2897	2.78507	2.30804	2	2	2	2.75886	2	8.11519	8.30076	8.37463	8.43119		#N/A
TRMT2A	ENSG00000099899	TRMT2A	-0.7725	1.3791e-06		7.19146	7.24345	8.31808	8.31593	8.16259	8.20949	8.39726	8.13958	7.51371	7.45644	7.71534	7.77012		#N/A
GFRA1	ENSG00000151892	GFRA1	1.52369	1.741e-06		10.1594	10.0536	9.54795	9.26815	9.11332	9.33935	8.32852	8.17084	10.9014	10.8277	10.5715	10.6673		#N/A
RUNX1T1	ENSG00000079102	RUNX1T1	1.24845	1.741e-06		7.33263	7.43248	5.79218	6.05479	6.38752	6.27317	5.67429	5.61502	7.27042	7.37783	6.8979	6.62831		#N/A
ZDHHC8	ENSG00000099904	ZDHHC8	-0.711168	2.23156e-06		8.71457	8.4238	9.0172	8.87274	9.34684	9.15572	9.23587	9.08311	8.43474	8.1802	8.4232	8.2867		#N/A
LOXL4	ENSG00000138131	LOXL4	1.33983	2.24346e-06		8.31461	7.71	6.87407	6.32539	6.5942	6.72605	5.8691	6.32012	7.76236	7.90388	7.14128	7.6334		#N/A
RASGRF2	ENSG00000113319	RASGRF2	1.61311	3.10015e-06		5.71546	5.5956	4.19232	4.78762	4.43199	4.136	4.29929	4.79852	6.28365	5.21966	6.20559	6.08559		#N/A
KLHL29	ENSG00000119771	KLHL29	1.41266	5.28959e-06		8.01279	7.99812	6.48687	6.8	7.31063	7.68907	6.79509	7.06324	8.93528	8.85079	8.38167	8.2867		#N/A
ENSG00000276805	ENSG00000276805	ENSG00000276805	-3.05618	5.28959e-06		2	2.56766	5.88807	6.11946	5.05785	4.68542	5.82281	6.13323	3.32417	2.99847	4.27957	3.40316		#N/A
LRRN4	ENSG00000125872	LRRN4	2.34426	5.8801e-06		7.79733	8.46375	5.14648	7.26771	6.09761	6.54904	5.4182	5.08776	7.81836	7.96661	8.71832	9.24204		#N/A
HSD17B7P2	ENSG00000099251	HSD17B7P2	-5.90166	5.8801e-06		2.65801	2	3.53815	3.44059	4.95254	4.02002	6.45911	6.67191	2.28077	2	2.26653	2		#N/A
DACT1	ENSG00000165617	DACT1	1.3509	6.55167e-06		11.0896	11.0397	9.11209	8.86569	9.04452	9.2359	9.17498	9.17188	9.9695	9.92966	10.1756	9.92911		#N/A
ESS2	ENSG00000100056	ESS2	-0.941607	7.34697e-06		7.29064	7.20625	8.12495	8.23798	7.90476	8.41289	7.86338	8.21864	6.82195	7.04142	7.11618	7.6738		#N/A
PODXL	ENSG00000128567	PODXL	2.18862	8.75031e-06		13.9766	14.1771	11.0753	11.2372	11.0427	11.4395	10.4468	10.3967	12.5608	12.759	12.0092	11.8911		#N/A
IFI16	ENSG00000163565	IFI16	0.701995	9.28339e-06		10.1029	9.92496	9.50323	8.99627	9.56126	9.3957	9.31534	9.00099	10.0383	10.1382	9.98194	9.85051		#N/A
TMPRSS4	ENSG00000137648	TMPRSS4	-1.95046	9.48647e-06		7.09718	6.91496	10.0209	9.97649	8.57997	8.1137	8.76785	8.57642	7.17069	6.76964	7.70976	7.70663		#N/A
LIMS2	ENSG00000072163	LIMS2	2.24665	1.02809e-05		5.47423	5.95081	4.11516	3.53844	3.86308	3.60277	3.5088	3.86697	6.21855	5.96676	4.15365	5.20539		#N/A
CCDC80	ENSG00000091986	CCDC80	1.27853	1.09357e-05		11.53	11.5391	10.2229	10.3778	10.0098	10.1558	9.8519	9.89461	11.5201	11.9262	10.5143	10.7245		#N/A
ARVCF	ENSG00000099889	ARVCF	-0.989715	1.16805e-05		8.44474	8.41568	8.92977	9.10805	8.99234	9.29324	8.90193	8.7726	7.60569	7.98945	7.78601	7.71955		#N/A
PDGFRA	ENSG00000134853	PDGFRA	1.85783	1.40453e-05		8.99178	9.01395	5.6073	6.41828	6.93556	7.74495	6.28224	6.32012	8.02763	8.08444	8.35331	8.32103		#N/A
CETN2	ENSG00000147400	CETN2	-0.377434	2.45007e-05		9.39245	9.34866	9.64722	9.67817	9.84673	9.70832	9.71286	9.74833	9.35433	9.45912	9.21449	9.32683		#N/A
CDH11	ENSG00000140937	CDH11	3.58715	2.52073e-05		6.7552	6.84408	2	3.33562	5.00615	4.60719	5.56604	5.42063	7.76236	7.42327	9.01844	9.06602		#N/A
PCDHB8	ENSG00000120322	PCDHB8	-2.12435	2.8701e-05		3.9596	3.14098	5.06675	4.57349	6.19317	5.79729	5.8691	5.91847	3.32417	4.21999	4.33864	3.93344		#N/A
EMILIN2	ENSG00000132205	EMILIN2	1.36847	3.47102e-05		8.03839	7.81257	6.50211	6.97622	6.66258	7.15516	6.02035	5.89727	8.13296	8.395	7.44664	7.57059		#N/A
ACTA1	ENSG00000143632	ACTA1	2.8146	5.31558e-05		9.03692	8.83666	5.74173	5.76253	4.50829	5.93176	3.25356	5.16076	7.36371	7.36625	6.38442	6.96861		#N/A
EFNA5	ENSG00000184349	EFNA5	-1.02774	5.33663e-05		7.98014	8.34898	9.26057	9.2025	9.02193	8.92122	9.6953	9.54006	8.60042	8.68347	7.85844	8.02041		#N/A
ICOSLG	ENSG00000160223	ICOSLG	3.27865	5.80336e-05		4.76109	5.08285	2	2.25154	2	2.42174	3.25356	3.07258	3.74986	4.21999	4.60237	4.78121		#N/A
MMP9	ENSG00000100985	MMP9	2.80145	6.43198e-05		13.7301	13.8448	10.2848	10.5475	9.60318	10.3349	9.05745	8.70708	11.8848	12.2512	10.6065	10.5734		#N/A
NDN	ENSG00000288364	NDN	-0.396547	6.581e-05		8.50105	8.51027	8.89556	8.7479	8.96214	8.92526	8.93495	8.96067	8.449	8.61658	8.52525	8.47377		#N/A
DSCAM	ENSG00000171587	DSCAM	4.66241	6.581e-05		7.25833	7.12885	2.77744	2.65209	2	2.42174	3.25356	2.28764	3.44293	4.80473	3.78029	3.63911		#N/A
GPR155	ENSG00000163328	GPR155	1.31393	6.80384e-05		6.10278	6.6774	5.14648	5.00859	4.83894	5.02333	5.28795	5.04982	5.70389	5.83845	6.8067	6.14428		#N/A
C1R	ENSG00000288512	C1R	-1.62003	7.04169e-05		5.22954	4.28005	7.69871	7.49797	6.69559	6.9002	7.11622	7.32384	5.94433	5.93574	5.86742	6.219		#N/A
CLSTN2	ENSG00000158258	CLSTN2	1.51432	7.40831e-05		11.0508	11.0749	8.8397	8.79815	9.53642	9.83601	8.64019	8.71012	10.697	10.8382	9.88496	9.78439		#N/A
CES1	ENSG00000262243	CES1	4.11169	7.84167e-05		4.98821	5.23834	3.27987	2.25154	2	2.42174	2	2.28764	4.93736	5.58216	2.8573	4.38666		#N/A
CRYL1	ENSG00000165475	CRYL1	-1.13204	7.86263e-05		6.07831	6.32508	7.22567	7.01072	7.43313	7.1274	8.05579	7.78284	6.64744	6.31902	6.66389	6.219		#N/A
CHURC1	ENSG00000258289	CHURC1	-0.710776	9.37967e-05		8.5946	8.82137	9.40331	9.46141	9.67322	9.4968	8.86814	9.14963	8.64755	8.63601	8.6056	8.63253		#N/A
ZNF528-AS1	ENSG00000269834	ZNF528-AS1	1.48466	9.37967e-05		8.59029	8.62042	7.56002	7.15653	6.42736	5.60939	7.02716	6.65937	7.98911	7.73396	8.39912	8.3792		#N/A
LZTR1	ENSG00000099949	LZTR1	-0.781729	9.97749e-05		6.92947	7.14859	7.50058	7.60348	7.44289	7.73578	7.26213	7.69954	6.51814	6.82147	6.54352	6.69526		#N/A
ENSG00000189229	ENSG00000189229	ENSG00000189229	4.07195	0.000111581		6.73968	6.50433	4.03364	3.63007	2.37082	2	2.54738	3.77696	4.21794	3.22064	7.53137	7.54903		#N/A
CEP128	ENSG00000100629	CEP128	-0.558875	0.000124239		7.78226	7.80014	8.37298	8.37009	8.20333	8.1137	8.54359	8.50462	7.98911	7.65044	7.83811	7.77632		#N/A
ZNF385D	ENSG00000151789	ZNF385D	-2.25097	0.000130434		2.90062	2.56766	4.33527	4.47807	5.24787	4.02002	4.60306	4.70398	3.44293	2.41427	3.39138	3.12092		#N/A
GALNT6	ENSG00000139629	GALNT6	1.21799	0.000149243		9.60864	9.57345	8.38946	8.02662	7.9118	7.88415	7.7065	7.39365	9.12487	9.02302	8.55357	8.43512		#N/A
PGGHG	ENSG00000142102	PGGHG	0.843131	0.000149243		9.48843	9.32717	8.12986	7.84253	8.72293	8.6654	8.32021	8.48699	9.2745	9.15346	9.09752	8.94743		#N/A
PTPRZ1	ENSG00000106278	PTPRZ1	-1.48656	0.000162292		7.29064	7.34106	9.06157	8.88209	8.53963	8.41863	7.5519	7.61763	7.03547	6.24503	7.15777	6.60063		#N/A
THY1	ENSG00000154096	THY1	1.7251	0.000162292		8.19453	8.05677	5.99961	5.07531	5.7966	5.76161	6.61665	6.39768	6.89669	6.45651	8.01602	7.70663		#N/A
KLHL4	ENSG00000102271	KLHL4	2.36511	0.000165516		6.70813	6.48892	4.64076	4.32195	4.26609	4.02002	2.94326	3.9517	6.18486	6.83835	4.82525	4.67905		#N/A
RTN4R	ENSG00000040608	RTN4R	-1.14895	0.000179385		6.50281	6.30763	6.60447	7.10955	7.28917	7.74495	6.91026	7.22518	5.94433	6.1935	5.62797	5.77488		#N/A
FRMPD4	ENSG00000169933	FRMPD4	2.90915	0.00018673		6.70813	6.81966	4.40176	3.87449	4.1754	4.02002	2.54738	3.07258	6.53161	6.96666	4.39538	4.25082		#N/A
CST5	ENSG00000170367	CST5	5.5459	0.000207202		4.87912	4.41659	2	2	2.37082	2	2	2	3.92331	4.11312	2.49142	2.7697		#N/A
BAIAP2-DT	ENSG00000226137	BAIAP2-DT	-0.459136	0.000234075		8.56849	8.4479	9.06157	9.0282	8.91386	9.01131	9.13054	9.24294	8.67207	8.6741	8.77555	8.52252		#N/A
GRM6	ENSG00000113262	GRM6	1.65163	0.000234075		4.82131	4.81281	4.33527	3.44059	3.60958	3.43174	3.99975	3.34737	5.57977	5.0562	4.82525	5.12995		#N/A
PTPRB	ENSG00000127329	PTPRB	3.13536	0.000258104		8.88649	9.01395	5.14648	5.10755	5.20266	6.02498	3.25356	3.68095	7.55385	7.90388	5.05395	5.93859		#N/A
LRRC32	ENSG00000137507	LRRC32	1.10564	0.00026266		6.34766	6.10022	4.98236	5.56771	5.15599	6.08394	5.06745	5.04982	6.43461	6.62155	6.46616	6.32428		#N/A
CCDC9B	ENSG00000188549	CCDC9B	2.23965	0.000299081		6.70813	6.23561	3.85531	3.63007	4.07861	3.43174	3.91402	3.68095	4.76568	5.31917	5.05395	4.38666		#N/A
FAM43B	ENSG00000183114	FAM43B	-2.93653	0.000299081		2.90062	2.31157	3.6518	4.26592	4.50829	5.24619	4.08067	3.68095	2.51569	2	2.68593	2.95597		#N/A
ADAMTS9	ENSG00000163638	ADAMTS9	1.8825	0.000306509		10.3882	10.7541	7.84329	8.2011	7.8324	8.28052	7.93041	7.83396	9.81291	10.0304	8.12489	8.24708		#N/A
TRBC2	ENSG00000276849	TRBC2	3.01731	0.000329642		9.15862	9.39692	5.86469	5.93414	4.64976	5.8993	4.15728	3.9517	7.63093	7.64085	5.84722	5.67226		#N/A
TAC3	ENSG00000166863	TAC3	1.72371	0.000335322		5.08963	4.90855	4.40176	4.42788	3.30185	4.02002	3.82288	4.10755	5.44396	5.1672	6.29778	5.77488		#N/A
MME	ENSG00000196549	MME	2.00034	0.000342363		9.2976	9.39486	8.54097	8.76316	7.78717	7.7631	6.53286	6.64672	9.37875	9.19336	10.5929	10.6293		#N/A
RCN3	ENSG00000142552	RCN3	1.56292	0.000342363		7.0093	6.90339	5.45906	5.07531	5.29171	4.89749	5.84614	5.83171	7.56699	7.33091	6.12399	5.89368		#N/A
ZNF25	ENSG00000175395	ZNF25	-1.65789	0.000342363		5.31579	4.71026	5.71583	5.44691	5.7966	6.08394	6.80703	6.82575	4.28307	3.9977	4.78334	4.82969		#N/A
AFF3	ENSG00000144218	AFF3	2.40595	0.000342363		6.38804	6.15981	2.30804	3.33562	4.07861	3.43174	3.82288	3.9517	4.40513	4.99732	5.22024	5.09069		#N/A
C22orf39	ENSG00000242259	C22ORF39	-0.939193	0.000371578		7.08495	6.47335	8.16378	8.14007	8.35567	7.94107	8.06576	7.80579	7.03547	7.18024	7.73196	7.21667		#N/A
DDX60L	ENSG00000181381	DDX60L	1.63385	0.000389756		8.73036	9.04061	6.5321	6.74982	7.19995	7.11331	6.02035	6.45685	8.08354	8.65993	7.20616	7.26154		#N/A
CD40	ENSG00000101017	CD40	2.05448	0.000421313		6.80078	6.90339	4.46533	3.87449	4.58076	3.43174	4.65683	4.24819	5.65551	5.93574	5.08878	4.92204		#N/A
EDN1	ENSG00000078401	EDN1	1.69507	0.000436116		8.8363	8.66222	6.82645	7.30988	5.94124	6.11254	5.53766	6.4127	8.11519	7.6312	7.23753	7.59884		#N/A
PTPRU	ENSG00000060656	PTPRU	-0.519591	0.000518404		11.9611	11.6737	12.5373	12.4113	12.6336	12.3254	12.6984	12.4985	12.1391	11.9355	12.2082	12.0444		#N/A
GNAO1	ENSG00000087258	GNAO1	2.40669	0.000540027		9.9032	9.70926	6.93147	6.4688	6.93556	6.85013	5.59387	5.32858	8.57463	8.36038	6.88805	6.87929		#N/A
FOXL2NB	ENSG00000206262	FOXL2NB	2.96111	0.000542136		6.77056	7.37497	3.53815	3.71623	3.86308	4.02002	3.25356	3.34737	5.88263	5.93574	3.78029	3.52595		#N/A
MT-ND4L	ENSG00000212907	MT-ND4L	0.74737	0.000597738		14.4398	14.2355	13.8891	13.9953	13.5458	13.6681	13.3096	13.3854	14.6222	14.7083	14.1711	14.1244		#N/A
GLI3	ENSG00000106571	GLI3	-0.668152	0.000626714		10.68	10.4974	11.5772	11.0866	11.5544	11.5377	11.7407	11.4946	10.8936	10.7684	11.1862	10.9414		#N/A
SLIT3	ENSG00000184347	SLIT3	2.68513	0.000626714		7.69644	7.86124	3.6518	3.87449	5.41576	5.13906	4.08067	3.68095	6.58424	7.05592	5.01827	4.82969		#N/A
ENSG00000286190	ENSG00000286190	ENSG00000286190	-0.732336	0.000628495		6.60912	6.59346	6.93147	7.08547	7.40347	7.48546	7.62116	7.48177	6.77744	6.62155	6.77498	6.43812		#N/A
NLRP3	ENSG00000162711	NLRP3	2.96612	0.000641746		5.866	5.73271	2.96503	3.53844	2.66556	2.74768	2.2995	2.73285	4.40513	4.73436	3.9414	3.40316		#N/A
PKD1L2	ENSG00000166473	PKD1L2	1.5207	0.000706356		7.37342	7.27073	6.54687	5.54435	5.45485	4.89749	5.18191	4.65428	6.83287	6.82147	6.82747	6.43812		#N/A
ENSG00000225313	ENSG00000225313	ENSG00000225313	0.906804	0.000740125		7.04762	7.47219	6.76463	6.8	5.99527	6.44043	6.11942	6.20402	7.19628	6.99703	7.61737	7.34731		#N/A
RIN3	ENSG00000100599	RIN3	1.60054	0.000755658		9.46503	9.50808	7.47765	7.20203	7.11709	7.3479	6.87667	6.3825	8.12854	8.20643	7.87848	7.75765		#N/A
ABCB1	ENSG00000085563	ABCB1	2.57073	0.000773449		4.5637	4.71026	2.56175	2.96525	3.46391	2.74768	3.25356	2.28764	3.19475	4.41255	5.01827	5.31163		#N/A
MARCHF4	ENSG00000144583	MARCHF4	3.17089	0.000823362		7.51689	8.04628	4.11516	4.42788	3.97486	4.02002	3.38682	3.34737	6.2018	6.43448	3.69244	3.52595		#N/A
NEK5	ENSG00000197168	NEK5	1.78681	0.000823362		7.27995	6.71761	4.64076	4.97403	5.82671	5.99457	5.02719	4.37633	7.36371	7.48886	5.80595	6.10542		#N/A
ENSG00000255983	ENSG00000255983	ENSG00000255983	4.26062	0.000908594		2.3662	2.56766	2.56175	2.25154	2.66556	2.74768	2.2995	2.28764	6.1328	6.29477	4.01567	4.62512		#N/A
TAGLN	ENSG00000149591	TAGLN	2.39627	0.0009091		12.8226	13.0586	9.9834	10.4376	9.49248	10.4131	7.8169	8.38784	11.8614	12.1137	9.99462	10.5492		#N/A
COL27A1	ENSG00000196739	COL27A1	0.918636	0.000953391		10.3128	10.1837	8.81551	8.82021	9.32327	9.09252	9.68725	9.42252	9.78508	9.59687	10.4208	10.3651		#N/A
KCNMA1	ENSG00000156113	KCNMA1	2.19926	0.000960745		5.97606	5.53688	6.21832	5.91605	6.0727	5.72504	5.64798	5.64076	8.227	7.90388	8.67886	8.92249		#N/A
PGBD5	ENSG00000177614	PGBD5	2.75329	0.000969626		8.99832	9.87842	4.58462	6.03816	5.52998	6.50657	5.449	5.35992	6.98742	7.99698	5.88734	6.0451		#N/A
UFD1	ENSG00000070010	UFD1	-0.683453	0.000969626		8.77672	8.905	9.04347	9.43307	9.03165	9.43586	9.07977	9.18506	8.37251	8.43992	8.23393	8.35869		#N/A
ENSG00000250138	ENSG00000250138	ENSG00000250138	-3.90849	0.000969626		2.90062	2.78507	3.13102	2.46567	5.20266	5.08235	6.47417	6.32012	3.05256	2.99847	2	2.30448		#N/A
GABRG2	ENSG00000113327	GABRG2	6.65149	0.000978458		5.35706	5.5066	2	2.25154	2	2	2	2	5.47217	5.27027	2	2		#N/A
ELMO1	ENSG00000155849	ELMO1	1.35409	0.00106341		8.50565	8.4238	7.15031	6.95865	6.79032	6.86701	6.69584	6.62108	8.68418	8.45093	7.35663	6.79632		#N/A
ZSCAN4	ENSG00000180532	ZSCAN4	2.37461	0.00111768		5.39718	5.56654	4.03364	3.53844	3.46391	3.23767	3.62126	2.28764	5.6307	5.90403	4.98167	3.40316		#N/A
ENSG00000273760	ENSG00000273760	ENSG00000273760	3.79946	0.00113897		6.73968	7.65585	2.30804	3.53844	3.11927	4.60719	2.54738	2	5.98404	6.71587	3.49887	4.17778		#N/A
NPPB	ENSG00000120937	NPPB	2.36548	0.0011537		8.14826	8.13308	6.39193	5.72145	5.37558	6.11254	3.25356	3.77696	7.9645	8.09852	6.6406	6.70829		#N/A
STMN2	ENSG00000104435	STMN2	5.54104	0.00116005		7.65567	7.61386	4.6948	4.66299	2.37082	3.43174	3.25356	3.46734	10.2363	10.4413	2.49142	2.30448		#N/A
MMP24	ENSG00000125966	MMP24	1.58547	0.00117657		6.55695	6.59346	4.79715	4.82688	4.71562	4.83021	3.62126	4.70398	5.6799	6.34286	5.31153	5.24168		#N/A
GDF7	ENSG00000143869	GDF7	5.20574	0.0012335		2.65801	2.56766	2.30804	2.25154	2	2.42174	2	2	3.83919	3.41312	5.94549	5.05034		#N/A
GABRR2	ENSG00000111886	GABRR2	1.33873	0.0012335		5.08963	5.04121	4.19232	3.87449	3.74189	4.136	4.08067	3.46734	5.05391	5.11277	5.28173	4.38666		#N/A
LINC02263	ENSG00000228358	LINC02263	5.21759	0.00123823		6.10278	5.95081	2.30804	2.25154	2	2	2.2995	2.28764	2.51569	3.87224	2.49142	2.95597		#N/A
LINC02487	ENSG00000203688	LINC02487	4.81435	0.00124056		4.5637	4.54132	2	2	2.66556	2	2	2	3.05256	3.41312	3.39138	2.95597		#N/A
TENM1	ENSG00000009694	TENM1	-1.09233	0.00127269		6.77056	6.71761	7.46215	7.46724	8.08996	7.91695	6.78305	7.14648	6.2351	5.99713	6.62882	6.37417		#N/A
CXCL12	ENSG00000107562	CXCL12	1.50455	0.00130006		7.0093	7.6764	5.25837	5.34242	5.52998	6.11254	4.98577	4.60281	6.39096	6.4782	6.32724	6.20068		#N/A
VWCE	ENSG00000167992	VWCE	1.4903	0.00138273		8.07595	8.33612	5.79218	6.13519	6.1221	6.3711	5.97873	6.3041	7.59931	7.42327	6.78563	6.08559		#N/A
ISG15	ENSG00000187608	ISG15	1.08907	0.00138273		7.3934	7.69665	6.21832	6.99357	6.50391	6.99541	5.99969	5.76303	7.56699	7.68816	7.04702	7.73236		#N/A
SHFL	ENSG00000130813	SHFL	1.0463	0.00138273		6.17379	5.70631	4.40176	5.04234	5.33426	5.5268	5.18191	4.84356	6.25146	6.31902	5.84722	5.84733		#N/A
ESM1	ENSG00000164283	ESM1	2.80144	0.00138273		3.2897	3.86855	2	3.09955	2	2.74768	2.75886	2.28764	4.34539	3.9977	4.39538	4.38666		#N/A
PEAR1	ENSG00000187800	PEAR1	2.14254	0.00144194		10.7773	10.7224	7.91334	8.58284	7.70038	8.61632	5.99969	6.3825	9.68771	9.72487	8.66451	8.8272		#N/A
HIC1	ENSG00000177374	HIC1	1.88263	0.00148531		6.73968	7.05754	4.6948	4.47807	3.97486	4.83021	3.82288	4.49401	5.05391	5.80451	5.60409	5.05034		#N/A
S100A9	ENSG00000163220	S100A9	2.35096	0.00150341		7.31179	7.54103	4.6948	5.13909	4.35142	4.52446	3.99975	3.07258	5.98404	6.3894	4.55334	5.50318		#N/A
C1orf116	ENSG00000182795	C1ORF116	2.68234	0.00158077		8.09437	8.34898	5.5202	5.42149	4.26609	5.19362	3.72559	3.21651	7.09109	7.08449	5.18848	5.12995		#N/A
ANK2	ENSG00000145362	ANK2	-1.3082	0.00175677		6.84497	7.16807	7.94155	8.26681	8.00692	8.6063	9.27722	9.45009	7.22142	7.67882	7.55646	7.85457		#N/A
CCDC177	ENSG00000267909	CCDC177	-5.97624	0.00178731		2	2	2	3.22241	2.91018	3.43174	5.02719	4.84356	2	2	2	2		#N/A
METTL9	ENSG00000284548	METTL9	-0.288199	0.00179543		10.3259	10.3833	10.6132	10.598	10.7921	10.5977	10.6576	10.6625	10.2527	10.3412	10.4802	10.4077		#N/A
IVNS1ABP	ENSG00000116679	IVNS1ABP	0.488217	0.00186993		11.9366	11.9309	11.0702	11.4367	11.4494	11.5264	11.3314	11.5056	11.9214	12.023	11.5369	11.8968		#N/A
GRM7-AS3	ENSG00000226258	GRM7-AS3	5.83614	0.00186993		3.45087	3.96078	2	2	2	2	2	2	2.71767	2	5.18848	3.63911		#N/A
ZDHHC17	ENSG00000186908	ZDHHC17	0.334215	0.00208562		10.0769	10.0562	9.55528	9.68085	9.60753	9.57081	9.76581	9.79494	9.95209	9.98184	9.85871	10.0644		#N/A
TTC3	ENSG00000182670	TTC3	-0.706045	0.00211193		12.7406	12.5183	13.071	12.9114	13.3452	13.1871	13.5472	13.3879	12.7832	12.7938	12.2198	12.098		#N/A
FAM90A28P	ENSG00000269118	FAM90A28P	5.66752	0.00211193		3.9596	3.66427	2	2	2	2	2	2	4.46249	4.21999	2	2.7697		#N/A
RAP1GAP2	ENSG00000132359	RAP1GAP2	1.58417	0.0022609		10.3115	10.405	8.07488	7.88034	8.86754	8.57581	7.58695	7.32384	9.64809	9.78049	8.46024	8.65625		#N/A
ENSG00000265912	ENSG00000265912	ENSG00000265912	5.23639	0.0022609		2.3662	2.31157	2	2	2	2	2	2	3.83919	4.11312	3.69244	3.40316		#N/A
LINC01629	ENSG00000258602	LINC01629	2.99507	0.00227388		6.28489	6.23561	2	2.65209	4.07861	3.60277	2.54738	2.91269	4.93736	4.80473	4.01567	4.10084		#N/A
CDX2	ENSG00000165556	CDX2	2.27138	0.00228037		4.98821	5.31023	2.30804	4.37589	3.11927	2.74768	2.75886	3.21651	5.09076	5.11277	5.05395	4.10084		#N/A
MT-ATP6	ENSG00000198899	MT-ATP6	0.645773	0.00233279		16.8672	16.8306	16.4965	16.5889	15.9823	16.2779	15.9907	16.0335	16.9216	17.2594	16.6952	16.7214		#N/A
FOXG1	ENSG00000176165	FOXG1	-5.14068	0.00233279		3.10823	2.31157	2.56175	2	7.1884	6.16809	8.88794	8.63204	3.55266	3.73482	2.8573	3.12092		#N/A
PAX6	ENSG00000007372	PAX6	-8.56937	0.00237162		2	2.97397	2.56175	2	4.83894	4.136	10.1408	9.89461	2	2	2.49142	2		#N/A
ARL14EP	ENSG00000152219	ARL14EP	-0.377113	0.00237162		8.29351	8.17218	8.73075	8.48499	8.73885	8.56032	8.7118	8.5864	8.3269	8.30076	8.33166	8.15494		#N/A
NCF2	ENSG00000116701	NCF2	2.81406	0.00252497		4.82131	5.23834	3.13102	2.81715	2.66556	3.23767	2.2995	2	4.97726	4.11312	3.5989	3.26893		#N/A
MT-CYB	ENSG00000198727	MT-CYB	0.611924	0.00254814		16.8891	16.86	16.5692	16.6754	15.9305	16.2698	16.1487	16.1801	16.9677	17.215	16.7999	16.8056		#N/A
FAM71F1	ENSG00000135248	FAM71F1	3.19619	0.00254814		8.66613	8.49107	5.6073	5.07531	4.43199	4.89749	2.2995	2.73285	7.16206	7.31894	4.98167	5.16816		#N/A
PLCD1	ENSG00000187091	PLCD1	0.943392	0.00259305		8.22828	8.21026	7.12101	7.53401	6.80552	7.09909	6.93223	6.94422	8.29173	8.28853	7.36376	7.41244		#N/A
ZNF681	ENSG00000196172	ZNF681	-0.950007	0.00260781		7.38345	7.72323	8.07997	8.00538	9.11027	8.52884	8.5038	8.44741	7.85631	7.87963	7.16595	7.14183		#N/A
LINC01266	ENSG00000224957	LINC01266	6.61208	0.00260781		2	2	2	2	2	2	2	2	5.47217	3.9977	4.86598	5.05034		#N/A
SH3KBP1	ENSG00000147010	SH3KBP1	1.49631	0.00264226		11.7814	11.7713	9.90677	9.99707	10.1958	10.3104	9.4375	9.44096	11.7596	11.9178	9.98656	9.94845		#N/A
IL2RB	ENSG00000100385	IL2RB	3.34361	0.00264226		8.27748	8.23817	4.79715	4.70574	2.91018	4.43671	2.2995	3.21651	4.34539	6.14007	4.86598	5.20539		#N/A
OTX1	ENSG00000115507	OTX1	-3.39025	0.00264226		3.45087	3.55015	3.41478	2.46567	6.04735	4.43671	7.46414	7.10083	3.55266	2.99847	3.49887	2.95597		#N/A
ITGB3	ENSG00000259207	ITGB3	3.1701	0.00272067		7.90561	7.97619	4.40176	4.01709	3.74189	4.24336	3.25356	3.21651	5.72748	5.0562	3.78029	3.52595		#N/A
HLCS	ENSG00000159267	HLCS	-0.450462	0.00277998		9.42435	9.34225	9.62129	9.59817	9.73009	9.72463	9.85908	9.58717	8.8811	9.24172	9.24954	9.25985		#N/A
SASH1	ENSG00000111961	SASH1	-0.593937	0.00278935		9.61077	9.93494	10.5533	10.5548	10.4123	10.1695	10.2388	10.0164	10.0097	9.71577	9.71006	9.41489		#N/A
C1QTNF1	ENSG00000173918	C1QTNF1	0.598096	0.00278935		7.07261	6.96035	6.39193	6.44376	6.02155	6.14058	6.56134	6.39768	6.85446	6.99703	6.73156	6.92464		#N/A
AMH	ENSG00000104899	AMH	1.81886	0.00282691		6.15051	6.40933	4.46533	4.47807	4.71562	5.60939	4.08067	5.32858	7.39351	7.20647	5.4519	5.44212		#N/A
COL6A4P2	ENSG00000228252	COL6A4P2	-1.81865	0.00282691		4.06298	3.29064	5.79218	5.49645	4.83894	4.136	5.95746	6.02007	4.51765	3.73482	3.39138	4.45007		#N/A
SPOCD1	ENSG00000134668	SPOCD1	2.36261	0.00287082		10.124	10.2503	6.65986	6.91377	6.6116	7.63095	6.10015	6.18665	8.37624	8.71578	6.69812	6.60063		#N/A
LRRIQ1	ENSG00000133640	LRRIQ1	-1.08149	0.00287082		6.38804	5.78411	6.85046	7.57494	7.37318	7.48546	8.13843	8.03181	6.7198	6.8044	6.77498	6.80847		#N/A
ENPP4	ENSG00000001561	ENPP4	-0.779693	0.00287082		6.70813	6.17914	7.35715	6.7701	7.44289	6.86701	7.53045	7.21664	6.55816	6.36632	6.66389	6.2726		#N/A
ENSG00000259727	ENSG00000259727	ENSG00000259727	1.68293	0.00287082		5.31579	5.47567	3.75714	3.94755	4.07861	4.136	3.25356	3.07258	5.44396	5.27027	4.15365	4.45007		#N/A
ALPG	ENSG00000163286	ALPG	4.6902	0.00292916		3.84823	3.96078	2	2.81715	2	2	2	2.28764	5.16174	5.90403	2.8573	2.55576		#N/A
ENSG00000275371	ENSG00000275371	ENSG00000275371	5.10968	0.00304496		2.65801	2.78507	2	2.25154	2.37082	2	2	2	5.52697	4.31948	3.5989	2.55576		#N/A
NT5E	ENSG00000135318	NT5E	2.67299	0.00306737		10.7981	11.1411	6.64621	7.12538	7.49069	7.90065	6.61665	6.28789	8.53507	9.15009	6.66389	6.80847		#N/A
PRDM1	ENSG00000057657	PRDM1	-0.942733	0.00306737		8.88297	9.03267	8.83067	9.14735	9.99166	9.73386	9.78707	9.94586	8.7199	8.76955	8.28362	8.33789		#N/A
ADGRG2	ENSG00000173698	ADGRG2	-3.00053	0.00308122		4.15945	3.77003	3.6518	3.94755	7.97366	8.44698	7.02716	6.97491	4.40513	5.62168	3.5989	4.17778		#N/A
FLJ16779	FLJ16779	FLJ16779	2.66519	0.00311158		11.0995	11.2202	7.92469	8.14007	8.48403	8.90905	5.99969	5.83171	10.8125	11.2793	7.70415	7.73236		#N/A
TGFB1I1	ENSG00000140682	TGFB1I1	2.05813	0.00311158		8.72643	8.60621	5.86469	5.65756	5.41576	6.5903	5.38672	5.66606	7.71594	7.70665	5.82673	5.64542		#N/A
REEP2	ENSG00000132563	REEP2	-0.803072	0.00311158		7.72824	7.6764	8.34368	8.16709	8.91035	8.90905	8.87666	8.87919	8.34988	8.15348	7.70415	7.74506		#N/A
EFEMP1	ENSG00000115380	EFEMP1	-0.762724	0.00315278		10.0815	10.2673	11.3841	11.5656	11.0443	11.0369	10.5507	10.6665	10.2628	10.3353	10.3669	10.5885		#N/A
NIPA1	ENSG00000288478	NIPA1	-0.57734	0.00315278		8.84358	8.62395	8.95213	8.95699	9.36491	9.23265	9.3402	8.93489	8.62575	8.37201	8.61758	8.25154		#N/A
BRINP2	ENSG00000198797	BRINP2	-3.72628	0.00315278		3.59583	2.78507	2.96503	3.33562	3.86308	3.43174	7.2001	6.91286	2.51569	2.41427	3.14892	2.7697		#N/A
TSPEAR-AS2	ENSG00000182912	TSPEAR-AS2	0.864075	0.00319328		6.53913	6.03807	5.3622	5.07531	5.6014	5.34592	5.28795	5.19592	6.0788	5.90403	6.2677	5.67226		#N/A
MBIP	ENSG00000151332	MBIP	-0.569383	0.00323267		8.06976	8.00896	8.73398	8.5971	8.90683	8.76785	9.01433	9.09013	8.27181	8.3189	8.53159	8.50023		#N/A
CNN1	ENSG00000130176	CNN1	2.31463	0.00323352		10.2917	10.3644	6.54687	6.7901	7.73255	8.49122	6.04071	6.02007	9.50697	9.56174	7.13296	7.75137		#N/A
SFRP2	ENSG00000145423	SFRP2	-5.50715	0.0032573		5.68337	5.31023	2.30804	2.46567	7.36294	7.71728	11.3596	11.2769	2.89481	4.49998	3.01047	3.93344		#N/A
MMP2	ENSG00000087245	MMP2	2.23439	0.0032688		14.0413	14.1208	11.0346	11.1171	10.9704	11.3258	9.92082	9.70931	12.4793	12.6799	10.7364	10.6446		#N/A
HOXA5	ENSG00000106004	HOXA5	-0.747329	0.0032688		9.62984	9.95049	10.8593	10.523	11.1449	10.7803	11.2114	11.1649	10.3556	10.3471	10.5119	10.3589		#N/A
GNB1L	ENSG00000185838	GNB1L	-1.07635	0.0033105		5.22954	5.27473	5.91108	6.5176	5.7023	6.41769	5.47917	5.89727	5.26208	4.58241	5.05395	4.73103		#N/A
NKAIN4	ENSG00000101198	NKAIN4	2.55787	0.0034156		11.233	11.2813	7.82524	7.86628	8.19181	8.94129	6.34909	6.73304	10.5542	10.6287	7.34227	7.36387		#N/A
NAV2	ENSG00000166833	NAV2	0.73606	0.00344796		11.1018	10.9995	10.2804	10.5548	9.88301	10.2473	9.8519	9.78775	10.8391	11.0549	10.3553	10.697		#N/A
SEPTIN11	ENSG00000138758	SEPTIN11	0.445425	0.00347033		12.2698	12.261	11.4086	11.5278	11.6533	11.6955	11.614	11.6241	11.9446	11.9404	11.9316	11.796		#N/A
RAMP1	ENSG00000132329	RAMP1	2.63648	0.00347033		6.21926	5.85792	2.96503	3.87449	3.60958	4.34327	2.2995	2.52735	5.92405	5.76975	3.86309	4.01957		#N/A
PRRT3	ENSG00000163704	PRRT3	-0.696851	0.00348317		6.83039	6.75673	7.65849	7.33052	7.01617	7.49635	7.97871	7.59146	7.02599	6.93564	6.84795	6.78407		#N/A
MT-ND3	ENSG00000198840	MT-ND3	0.595875	0.00348869		14.3785	14.334	14.0776	14.2093	13.529	13.8556	13.6753	13.8116	14.5388	14.8243	14.2857	14.4115		#N/A
TMEM191B	ENSG00000278558	TMEM191B	-2.69182	0.00348869		2.3662	2.97397	3.6518	4.14686	3.97486	2.74768	4.85386	4.17958	2.71767	2.73574	2.26653	2.30448		#N/A
MELTF	ENSG00000163975	MELTF	1.59753	0.00351218		10.1165	10.2121	7.71841	7.79382	8.19181	8.59621	7.26213	7.15544	9.21525	9.54385	8.10802	8.20635		#N/A
UPF3B	ENSG00000125351	UPF3B	-0.473515	0.00351626		9.03375	9.21226	9.72557	9.73086	9.85771	9.65828	9.85765	9.94586	9.22149	9.31286	9.52695	9.58343		#N/A
LCP2	ENSG00000043462	LCP2	-2.86159	0.00351925		2.65801	2.31157	4.19232	3.33562	3.46391	3.75566	5.14475	5.01086	2.28077	2	3.01047	3.12092		#N/A
SAE1	ENSG00000142230	SAE1	-0.195496	0.00361867		11.3829	11.3199	11.5794	11.5404	11.6427	11.5971	11.5791	11.5931	11.4777	11.433	11.3704	11.3717		#N/A
SALL3	ENSG00000277015	SALL3	2.58945	0.00390046		5.65055	5.95081	4.79715	4.20762	2.91018	3.75566	2.2995	2	5.86146	5.45665	6.28281	5.56177		#N/A
MED15	ENSG00000099917	MED15	-0.77152	0.00397311		10.0999	10.007	10.4588	10.6399	10.2812	10.662	10.1372	10.1812	9.40824	9.43158	9.13757	9.50908		#N/A
DGCR8	ENSG00000128191	DGCR8	-0.669777	0.00397311		8.80682	9.1524	9.51829	9.95228	9.452	10.1729	9.73802	10.0731	9.20478	9.20641	9.10179	9.49975		#N/A
DPYSL3	ENSG00000113657	DPYSL3	1.87002	0.00400177		14.3157	14.3784	11.8604	12.2007	11.4458	11.8674	11.0981	11.1983	13.3945	13.685	11.4433	11.4411		#N/A
EDIL3	ENSG00000164176	EDIL3	0.590013	0.00400177		10.0441	10.0509	9.42146	9.41063	9.65235	9.44433	9.24687	9.32067	10.1275	10.3778	9.72258	9.594		#N/A
TWIST1	ENSG00000122691	TWIST1	1.50565	0.00400177		7.12133	7.07828	6.18094	6.59923	6.52242	6.08394	6.54717	6.7089	7.10015	7.23223	8.65001	8.9364		#N/A
L3HYPDH	ENSG00000126790	L3HYPDH	0.984644	0.00406188		7.20282	7.15836	5.91108	5.5206	6.36717	5.96351	5.97873	5.19592	6.58424	6.54139	6.6406	6.45367		#N/A
ARHGAP31	ENSG00000031081	ARHGAP31	1.96645	0.00417696		9.07761	9.24472	5.88807	5.78263	6.2161	7.22231	6.22998	5.64076	7.72183	7.48886	6.74254	6.48429		#N/A
IVL	ENSG00000163207	IVL	3.4009	0.00421347		8.26127	8.17218	5.02517	4.78762	2.37082	4.02002	2.2995	2.73285	5.55361	5.96676	4.86598	4.5691		#N/A
LCAT	ENSG00000213398	LCAT	0.541182	0.00421347		7.86327	8.11312	7.55272	7.73312	7.71655	7.88415	7.45658	7.80008	8.36876	8.19338	8.26851	8.46995		#N/A
SNCG	ENSG00000173267	SNCG	-1.43896	0.00434435		7.99329	7.81257	9.27616	9.38784	10.678	10.614	9.44898	9.21322	8.16355	8.01193	9.09966	9.16618		#N/A
ANKRD10	ENSG00000088448	ANKRD10	0.304523	0.00445939		10.6199	10.6013	10.4715	10.4526	10.4873	10.3841	10.5166	10.4704	10.8785	10.856	10.8632	10.7633		#N/A
SNAI2	ENSG00000019549	SNAI2	1.24038	0.00445939		8.94179	9.13518	7.12101	7.35758	6.96294	7.71728	7.12578	7.08216	8.27981	8.68347	7.39192	7.50492		#N/A
RFLNB	ENSG00000283979	RFLNB	1.41118	0.00445939		6.96994	6.85614	4.79715	4.78762	5.52998	4.83021	5.75046	5.80918	5.26208	6.27011	7.11618	6.69526		#N/A
DKK2	ENSG00000155011	DKK2	2.42474	0.00445939		5.47423	4.41659	2.96503	2.65209	3.11927	3.43174	3.82288	3.46734	2.71767	4.99732	5.55512	5.87069		#N/A
RNASEL	ENSG00000135828	RNASEL	-0.83973	0.00447253		6.21926	5.83373	6.7132	6.5414	6.82056	6.27317	7.25343	6.97491	6.31513	5.76975	6.01956	5.72448		#N/A
MYLK	ENSG00000065534	MYLK	1.74063	0.00459077		10.4079	10.507	8.04399	8.10855	7.65075	7.60098	7.54479	7.23366	8.53173	8.85494	8.05176	8.15494		#N/A
ENSG00000230202	ENSG00000230202	ENSG00000230202	-4.23514	0.0046119		4.63254	4.4803	4.89273	4.66299	10.1696	10.0998	4.48911	4.60281	3.83919	4.49998	5.08878	4.87661		#N/A
CYGB	ENSG00000161544	CYGB	2.74189	0.0046119		8.7956	8.8397	5.42749	6.07123	5.66944	5.5268	3.72559	3.21651	7.7509	7.75188	5.18848	4.92204		#N/A
TM4SF1	ENSG00000169908	TM4SF1	2.79418	0.0046119		8.44474	8.74885	4.19232	5.34242	4.77859	5.39331	3.91402	3.77696	5.35588	5.76975	5.4519	4.78121		#N/A
LTB	ENSG00000223448	LTB	2.64535	0.0046119		8.66202	8.4238	5.25837	5.10755	4.64976	5.43919	4.36538	3.21651	5.6799	5.80451	5.25131	5.61807		#N/A
PCDHGA3	ENSG00000254245	PCDHGA3	-3.80662	0.0046119		2.3662	2.78507	4.46533	2.96525	6.16987	5.43919	2.2995	3.34737	2.71767	2.41427	2.49142	2		#N/A
PCED1B	ENSG00000179715	PCED1B	2.94838	0.0046119		5.27331	4.28005	2.56175	2.46567	2.66556	2.42174	2.2995	2.52735	3.19475	2.99847	3.5989	3.63911		#N/A
ENSG00000256417	ENSG00000256417	ENSG00000256417	2.92953	0.00462456		3.59583	3.55015	2.56175	2.46567	3.74189	3.23767	2.2995	2	5.55361	5.54152	4.64978	4.32034		#N/A
TFAP2A	ENSG00000137203	TFAP2A	-0.429958	0.00481693		11.3659	11.3527	12.023	11.8961	11.8249	11.4983	11.9487	11.9268	11.5361	11.6226	11.4045	11.2922		#N/A
ATP6V1C2	ENSG00000143882	ATP6V1C2	-3.11838	0.00487811		4.63254	4.34994	4.6948	5.65756	4.1754	5.02333	9.04238	8.87919	4.57079	5.0562	3.69244	5.16816		#N/A
TCF15	ENSG00000125878	TCF15	4.01667	0.00492102		5.22954	4.95414	2	2	2.66556	2.74768	2.2995	2	3.05256	4.11312	3.39138	2.55576		#N/A
LINC00592	ENSG00000258279	LINC00592	1.97574	0.0049298		4.49141	4.28005	2.96503	3.22241	3.30185	3.01338	2.75886	2.28764	4.67153	3.87224	4.27957	3.40316		#N/A
TMEM63A	ENSG00000196187	TMEM63A	0.440885	0.00499751		10.118	9.9603	9.6143	9.67414	9.62905	9.55787	9.56074	9.35995	10.2977	9.96273	9.89483	9.7533		#N/A
YTHDF1	ENSG00000149658	YTHDF1	0.68124	0.00503832		11.3558	11.4182	10.3324	10.508	10.2537	10.585	10.1642	10.3041	10.8526	11.1509	10.503	10.7703		#N/A
CXXC5	ENSG00000171604	CXXC5	-0.734043	0.00503832		9.17314	9.3401	9.20579	10.0766	9.435	9.81659	9.97871	10.1434	8.85723	9.23536	8.82028	9.01713		#N/A
CTNNA2	ENSG00000066032	CTNNA2	-2.69082	0.00503832		4.06298	4.4803	6.06262	6.13519	7.88343	7.59086	9.38868	9.34241	5.19597	4.11312	6.7205	6.82052		#N/A
MED16	ENSG00000282092	MED16	-0.276203	0.00503832		9.12617	9.14259	9.42945	9.29989	9.4301	9.54743	9.40841	9.48071	9.17292	9.16688	9.10179	9.23306		#N/A
FCGRT	ENSG00000104870	FCGRT	0.561035	0.00503832		8.53292	8.39102	8.10513	7.73828	7.8024	7.69854	8.0407	7.77705	8.64446	8.59688	8.25324	8.04115		#N/A
TNS4	ENSG00000131746	TNS4	2.47105	0.00503832		7.78226	7.64893	4.79715	4.14686	5.05785	5.39331	2.54738	3.34737	6.29948	5.90403	5.47841	5.31163		#N/A
CSMD2	ENSG00000121904	CSMD2	2.48013	0.00503832		6.07831	6.45761	3.13102	3.53844	3.97486	3.43174	3.10674	3.07258	4.76568	5.31917	3.14892	3.84184		#N/A
LINC01239	ENSG00000234840	LINC01239	1.61025	0.00503832		6.28489	5.95081	4.26557	5.13909	4.26609	4.60719	3.72559	3.68095	6.21855	5.87162	4.90558	4.82969		#N/A
LRP1	ENSG00000123384	LRP1	1.08285	0.005078		13.1524	13.1258	11.2863	11.1744	11.6417	11.7759	11.5986	11.3746	12.5749	12.5306	11.7505	11.5698		#N/A
PI4KAP1	ENSG00000274602	PI4KAP1	-1.46075	0.005078		9.19322	8.89918	9.85431	9.64285	8.99234	9.02266	11.0599	10.7516	8.85188	8.2575	8.20644	8.19251		#N/A
RN7SL1	ENSG00000276168	RN7SL1	-2.06248	0.005078		5.08963	5.3787	7.75066	7.66435	6.04735	5.96351	5.02719	5.08776	4.34539	4.66039	4.60237	4.32034		#N/A
SOX2	ENSG00000181449	SOX2	-2.36725	0.00524211		2.90062	3.86855	5.25837	3.44059	6.5942	6.05476	6.92129	6.07776	4.89632	4.49998	3.78029	3.12092		#N/A
KRT17	ENSG00000128422	KRT17	2.68138	0.00525648		6.42732	6.19821	3.27987	4.20762	2.37082	4.68542	2.75886	2.73285	6.06034	6.1935	3.69244	4.32034		#N/A
CORO6	ENSG00000167549	CORO6	2.26819	0.00526841		10.5963	10.5924	8.06466	8.10855	7.77177	8.28052	6.08061	6.22119	10.1341	10.2528	7.16595	7.51237		#N/A
EEF1A2	ENSG00000101210	EEF1A2	1.5492	0.00526841		8.94518	8.89042	6.32497	5.80247	6.80552	6.8837	6.51841	6.62108	7.11811	6.87151	7.65271	7.26154		#N/A
ZNF488	ENSG00000265763	ZNF488	2.61113	0.00526841		7.04762	7.06795	3.53815	4.61893	2.91018	3.60277	3.5088	3.77696	5.38585	5.27027	4.15365	3.52595		#N/A
ANKRD1	ENSG00000148677	ANKRD1	1.52433	0.00540184		11.1837	10.7298	8.86937	9.02398	9.16727	9.63629	7.20913	8.57309	10.6273	10.2854	9.18863	9.68081		#N/A
ENSG00000280134	ENSG00000280134	ENSG00000280134	3.62825	0.00543392		4.33496	3.29064	2	2.25154	2	2.42174	2.54738	2	3.55266	3.73482	2.8573	3.40316		#N/A
UBE2Q2P1	ENSG00000189136	UBE2Q2P1	0.832767	0.00546559		6.88784	6.98252	5.74173	6.26949	6.14618	5.68751	5.95746	5.87574	7.13585	6.73402	6.28281	6.32428		#N/A
CFTR	ENSG00000001626	CFTR	2.10791	0.00552966		9.94609	10.1176	6.9538	6.86745	6.57659	8.04859	6.04071	5.64076	7.90367	8.21292	7.62332	7.44393		CFTR
ZNF114	ENSG00000178150	ZNF114	1.32967	0.005563		8.50565	8.82444	6.98666	6.93189	6.79032	6.24761	6.94309	6.60808	8.02763	8.25122	6.82747	6.91343		#N/A
CIDEA	ENSG00000176194	CIDEA	3.10276	0.00557128		6.1967	5.92814	3.13102	2.65209	3.60958	3.43174	2	2	4.40513	4.58241	3.39138	4.10084		#N/A
TACC2	ENSG00000138162	TACC2	-0.729118	0.00558729		9.58495	9.68243	10.453	10.4305	9.69787	9.89276	10.0744	10.0801	8.98262	8.96659	9.52059	9.52389		#N/A
KRT8P3	ENSG00000254285	KRT8P3	1.61153	0.00570921		6.02809	6.32508	3.41478	4.66299	4.07861	4.96178	4.08067	3.57809	5.05391	5.62168	4.90558	5.16816		#N/A
MEG3	ENSG00000214548	MEG3	-6.83276	0.00576874		2	2	3.75714	3.63007	9.42519	10.0709	2.2995	2.73285	2	2.41427	3.27524	3.63911		#N/A
LPCAT2	ENSG00000087253	LPCAT2	1.39349	0.00579043		10.3128	10.5401	8.84568	9.16661	8.15668	8.51819	7.57303	7.55807	9.51207	9.80431	8.94906	8.99604		#N/A
LRP1B	ENSG00000168702	LRP1B	-1.0572	0.00579043		6.02809	6.27207	8.05952	8.25247	7.24525	6.83304	7.58	7.6934	6.7887	7.04142	6.70935	6.89076		#N/A
PDE4DIP	ENSG00000178104	PDE4DIP	-0.778229	0.00579264		9.30816	9.05638	10.4182	10.0746	10.3822	9.77917	10.7401	10.5085	9.55885	9.54642	9.94083	9.84904		#N/A
CHST3	ENSG00000122863	CHST3	0.93371	0.00579264		10.2011	10.2548	8.72751	8.57133	9.07933	8.79457	8.71497	8.42906	9.44606	9.36328	9.13341	9.07359		#N/A
GLIPR1	ENSG00000139278	GLIPR1	2.11519	0.00579264		9.56087	9.73724	6.60447	6.80983	6.5942	7.18239	5.14475	6.05878	7.74513	8.13994	6.20559	7.093		#N/A
ZNF528	ENSG00000167555	ZNF528	1.36948	0.00579264		9.61077	9.7869	8.43779	8.42549	7.05485	7.15516	7.27078	7.21664	8.43115	8.43438	8.67027	8.91409		#N/A
DPP4	ENSG00000197635	DPP4	2.57544	0.00579264		8.81425	8.99499	5.6073	6.05479	5.24787	5.64898	3.99975	4.60281	7.12701	7.44547	4.50258	5.20539		#N/A
GPX7	ENSG00000116157	GPX7	-1.27576	0.00579264		5.92208	5.97312	8.05952	7.89427	8.30844	8.15553	8.90748	8.57309	7.38611	7.45644	7.62924	7.33896		#N/A
RELN	ENSG00000189056	RELN	2.45766	0.00579264		3.59583	4.20661	3.27987	2.81715	3.30185	4.24336	4.54721	3.9517	5.75069	5.69761	7.05585	6.39043		#N/A
GALNTL6	ENSG00000174473	GALNTL6	-3.94066	0.00579264		2.90062	3.14098	2.77744	2.65209	4.26609	3.23767	6.74632	6.73304	2.28077	2.41427	2	3.12092		#N/A
JAKMIP2-AS1	ENSG00000280780	JAKMIP2-AS1	2.78935	0.00579264		6.7552	7.02587	4.03364	4.47807	3.46391	3.43174	2.94326	2.28764	5.55361	5.76975	3.86309	3.52595		#N/A
RGPD2	ENSG00000185304	RGPD2	-5.18805	0.00579264		2	2	4.26557	4.20762	2	2	6.4439	6.13323	2.51569	2.41427	2	2.55576		#N/A
PIK3CG	ENSG00000105851	PIK3CG	4.45624	0.00579264		3.9596	5.83373	2.30804	2.81715	2	2	2	2	3.74986	4.41255	2.26653	3.26893		#N/A
TSPY26P	ENSG00000235217	TSPY26P	-0.784579	0.00589405		6.96994	6.12036	7.94713	7.52806	7.92578	7.94903	7.64796	7.64333	7.32557	7.02678	7.27582	7.073		#N/A
CDH13	ENSG00000140945	CDH13	2.42277	0.00590245		9.28696	9.46543	6.48687	6.22609	7.21141	7.42973	4.70867	4.84356	9.30619	9.38927	6.22137	6.23709		#N/A
SEC14L2	ENSG00000100003	SEC14L2	2.18072	0.00594492		9.12019	9.19575	5.6073	6.74982	5.91345	6.32297	5.10662	5.3906	7.2297	7.55159	5.78487	6.16333		#N/A
L1CAM	ENSG00000198910	L1CAM	3.0564	0.00598207		10.9045	10.8754	7.15995	7.07735	5.66944	6.78054	6.28224	5.85389	8.18075	8.4781	6.43943	6.25495		#N/A
AGAP9	ENSG00000204172	AGAP9	0.803629	0.00598253		7.03496	7.09872	6.5321	6.29771	7.05485	7.09909	6.70863	6.69667	7.76236	7.62149	7.77536	7.69359		#N/A
NME7	ENSG00000143156	NME7	-0.447941	0.00612724		7.16846	7.51845	7.69209	7.69119	7.80996	7.73578	7.75044	7.84508	7.52048	7.25754	7.11618	7.25268		#N/A
NRK	ENSG00000123572	NRK	1.674	0.00613828		11.1583	10.7805	10.608	10.1158	9.83381	9.34237	8.00486	7.75364	11.8524	11.6922	11.1019	10.7413		#N/A
HOXB2	ENSG00000173917	HOXB2	-0.426708	0.00629419		10.3819	10.3875	10.7311	10.5178	10.9354	11.0228	11.0455	10.9673	10.3688	10.4808	10.605	10.4929		#N/A
FAT3	ENSG00000165323	FAT3	-0.848085	0.00629419		8.73428	8.7553	9.96152	9.67009	10.3359	10.1316	10.3316	9.92637	9.8239	9.56681	9.23795	8.92807		#N/A
SHD	ENSG00000105251	SHD	-2.54981	0.00636848		3.84823	3.14098	4.11516	3.71623	4.64976	4.136	6.91026	6.64672	3.19475	3.41312	3.78029	3.74403		#N/A
ALPK2	ENSG00000198796	ALPK2	1.74006	0.00658061		6.98318	7.26169	4.11516	5.13909	4.95254	6.3711	4.75871	4.10755	6.16771	7.34279	5.983	6.00343		#N/A
MEGF6	ENSG00000162591	MEGF6	0.392439	0.00658235		10.6523	10.6764	10.24	10.1835	10.2866	10.6571	10.105	10.2244	10.7221	10.6729	10.6377	10.7381		#N/A
GATA4	ENSG00000285109	GATA4	3.18286	0.00665915		3.59583	3.86855	2.56175	3.09955	2.91018	2.42174	3.91402	3.77696	3.83919	3.87224	7.23753	6.80847		GATA4
GJB3	ENSG00000188910	GJB3	2.51735	0.00676916		7.04762	7.23424	4.52621	3.53844	3.46391	4.96178	3.25356	2.91269	5.16174	5.93574	4.01567	4.5691		#N/A
FOXO6	ENSG00000281518	FOXO6	-1.12767	0.00681981		5.89431	5.88171	7.77595	7.44849	7.35263	6.72605	7.54479	6.81448	6.85446	6.67888	6.2677	5.34538		#N/A
FOXL2	ENSG00000183770	FOXL2	2.95534	0.00681981		6.55695	6.85614	4.03364	2.81715	3.86308	3.75566	2	2.52735	5.38585	4.80473	4.01567	3.63911		#N/A
GBP4	ENSG00000162654	GBP4	3.99363	0.00681981		4.4153	2.97397	2.30804	2.25154	2	2.42174	2	2	3.74986	2.41427	3.49887	3.52595		#N/A
GCN1	ENSG00000089154	GCN1	0.26001	0.00686318		11.4806	11.5691	11.2066	11.1663	11.2141	11.2205	11.1973	11.0393	11.3908	11.306	11.4654	11.3783		#N/A
VTCN1	ENSG00000134258	VTCN1	1.50722	0.00699411		9.08684	9.30534	7.58885	8.03921	7.29994	7.11331	6.31605	5.89727	8.70513	8.82563	7.37085	8.11637		#N/A
KLHL14	ENSG00000197705	KLHL14	-6.44962	0.00699411		2	2.78507	2	2.46567	4.35142	3.60277	8.12895	8.21864	2.71767	2.41427	2	2		#N/A
HAPLN3	ENSG00000140511	HAPLN3	1.49875	0.00707265		9.04326	9.08995	5.99961	6.40537	6.93556	7.39522	6.70863	7.41619	8.10171	8.43992	7.08201	7.17973		#N/A
RBPMS	ENSG00000157110	RBPMS	0.539193	0.00711906		10.7678	10.6165	10.4569	10.3469	10.2286	10.3826	9.80206	9.77473	10.7185	10.6658	10.7535	10.8333		#N/A
LPP	ENSG00000145012	LPP	0.958381	0.00730156		12.0936	12.0893	10.5723	10.6044	10.944	10.8721	10.3643	10.3221	11.4646	11.6846	10.9047	10.7444		#N/A
MT-CO2	ENSG00000198712	MT-CO2	0.617775	0.0073753		17.7943	17.728	17.3241	17.3904	16.8428	17.1443	16.7122	16.7706	17.7189	17.928	17.3571	17.4332		#N/A
TSPAN1	ENSG00000117472	TSPAN1	2.59261	0.00738952		7.08495	6.57898	4.40176	4.20762	3.46391	3.75566	2.75886	2.52735	4.40513	5.69761	4.60237	3.84184		#N/A
TSPAN2	ENSG00000134198	TSPAN2	1.14001	0.00742511		8.87588	9.17183	7.19787	7.8037	7.39344	7.0258	7.2181	7.33177	8.51827	8.37201	7.18217	7.91761		#N/A
GRID2	ENSG00000152208	GRID2	-2.47373	0.00742951		2	2.31157	4.11516	4.66299	3.30185	3.43174	4.75871	5.08776	2.51569	2.99847	3.27524	3.26893		#N/A
RPL10P6	ENSG00000230076	RPL10P6	3.36304	0.0076738		7.63904	7.48777	3.41478	2.46567	3.74189	3.23767	3.5088	3.77696	3.83919	2.41427	4.01567	4.38666		#N/A
TET2	ENSG00000168769	TET2	-0.47634	0.00777889		9.16445	9.31411	9.84985	9.65245	9.65864	9.45832	9.9866	10.1058	9.33527	9.35157	9.4537	9.33945		#N/A
CHROMR	ENSG00000223960	CHROMR	0.442723	0.00789803		8.55081	8.73259	8.13963	7.94867	8.2706	7.97262	8.38934	8.13506	8.55169	8.4007	8.75673	8.49272		#N/A
LINC01036	ENSG00000230426	LINC01036	3.89378	0.00790334		3.45087	2.97397	3.27987	3.63007	3.86308	2.42174	2.54738	2.28764	7.77939	7.61171	3.49887	2.7697		#N/A
LINC02635	ENSG00000283000	LINC02635	-1.89617	0.00790334		2.3662	2.78507	5.3622	4.93862	4.71562	4.34327	4.36538	4.49401	3.92331	2.41427	3.86309	3.63911		#N/A
LAMC2	ENSG00000058085	LAMC2	2.28447	0.00795778		13.4547	13.7483	10.5867	11.0932	9.95123	10.7084	8.74321	8.4401	11.6741	11.9685	10.2969	10.317		#N/A
SLC22A3	ENSG00000146477	SLC22A3	3.69054	0.00797358		6.07831	6.37622	2.96503	2	2.66556	3.75566	2	2.28764	4.46249	5.31917	3.14892	2.55576		#N/A
TRIM66	ENSG00000166436	TRIM66	0.68514	0.00805401		8.27748	8.37435	7.91903	7.35086	7.04207	7.04076	7.55898	7.33177	7.99398	7.94341	7.91775	7.92321		#N/A
GALNT14	ENSG00000158089	GALNT14	1.38864	0.00812476		6.12684	5.44407	4.26557	3.71623	4.64976	5.19362	3.38682	4.17958	5.44396	5.21966	5.50443	5.16816		#N/A
NIPAL4	ENSG00000172548	NIPAL4	2.35539	0.00816749		6.59194	5.83373	4.52621	4.70574	3.60958	5.13906	2.54738	3.34737	6.9478	7.16695	4.08631	5.24168		#N/A
CTSH	ENSG00000103811	CTSH	1.58149	0.00827925		11.035	11.115	8.51116	8.33308	9.63756	9.88657	8.46665	8.30572	10.7619	10.979	9.22431	9.12063		#N/A
BCAT1	ENSG00000060982	BCAT1	0.993518	0.00842745		12.8133	12.8559	11.2896	11.3199	11.2127	10.9133	11.1882	11.1003	11.6419	11.937	11.5604	11.4956		#N/A
RGS5ENSG00000143248	RGS5ENSG00000143248	RGS5ENSG00000143248	1.7101	0.00842745		10.1681	10.0457	9.60727	9.55498	9.68765	9.76572	8.44389	8.53926	9.94204	9.94142	12.0915	12.0765		#N/A
PSPHP1	ENSG00000226278	PSPHP1	-6.03116	0.00842745		2	2	4.84573	4.57349	4.35142	3.89388	2	2	2	2	2	2		#N/A
ENSG00000275216	ENSG00000275216	ENSG00000275216	2.64789	0.00850686		8.06976	7.97066	5.48995	6.15074	3.46391	3.89388	3.38682	3.21651	7.2297	7.24495	5.57982	4.5691		#N/A
ADAMTS13	ENSG00000281244	ADAMTS13	-0.742004	0.00854922		6.73968	6.15981	7.41464	7.45477	6.57659	7.1274	7.58	7.37843	6.50455	6.4782	6.75343	6.73399		#N/A
LINC02562	ENSG00000260265	LINC02562	-2.00789	0.0087548		2.65801	2.56766	4.84573	4.47807	3.60958	3.43174	3.82288	4.17958	2.89481	3.41312	3.14892	2.55576		#N/A
TMEFF2	ENSG00000144339	TMEFF2	-3.60254	0.00881519		2.65801	2.56766	3.53815	3.09955	3.97486	4.136	7.33815	7.11926	3.32417	2	2.49142	4.25082		#N/A
SFXN3	ENSG00000107819	SFXN3	1.42186	0.00887812		10.3076	10.3346	8.12002	8.0804	7.8324	8.21609	8.11941	7.80008	8.81931	9.21935	8.24555	8.08176		#N/A
MCAM	ENSG00000076706	MCAM	2.30244	0.0089633		12.2775	12.4151	8.49602	8.55389	9.03165	9.41879	8.32437	8.45831	9.59457	9.75406	8.57523	8.52252		#N/A
DOC2B	ENSG00000272670	DOC2B	-1.82925	0.0089633		3.2897	2.97397	5.95603	6.11946	5.4929	6.02498	7.07731	6.62108	4.85407	4.66039	5.53	5.00883		#N/A
SNAP91	ENSG00000065609	SNAP91	-1.65972	0.0089633		2.3662	3.66427	4.58462	3.71623	5.33426	4.83021	4.48911	4.88724	3.32417	3.73482	3.49887	3.74403		#N/A
NEXN	ENSG00000162614	NEXN	1.15866	0.00900351		8.7843	8.80901	6.9538	7.62591	6.71182	7.28647	7.03733	7.45299	8.09719	8.64082	6.82747	8.1454		#N/A
IRX4	ENSG00000113430	IRX4	2.27367	0.00906781		8.51935	8.33181	5.88807	6.00431	5.24787	5.13906	4.36538	4.37633	7.07278	7.42327	4.33864	5.50318		#N/A
TMEM51-AS1	ENSG00000175147	TMEM51-AS1	1.7331	0.0090857		5.866	6.44169	4.98236	5.07531	2.91018	4.34327	4.29929	4.37633	6.68407	6.36632	4.78334	5.09069		#N/A
IL32	ENSG00000008517	IL32	2.32189	0.00914941		9.25456	9.44362	5.10716	6.21134	6.36717	7.3479	4.54721	4.49401	7.54724	7.78707	6.28281	6.70829		#N/A
IFFO2	ENSG00000169991	IFFO2	1.83697	0.00915756		12.1669	11.933	9.21738	9.37796	9.57019	10.0563	8.26502	8.3571	10.902	10.5781	9.10392	9.50722		#N/A
NAV2-AS6	ENSG00000270607	NAV2-AS6	2.56514	0.00917794		5.89431	5.5956	3.13102	2.81715	2	4.02002	3.10674	3.07258	5.0161	4.87182	2.8573	4.01957		#N/A
SYT6	ENSG00000134207	SYT6	2.07678	0.00917794		5.35706	5.23834	2.56175	4.52657	2.91018	3.75566	2.54738	2.91269	5.2294	5.11277	4.44998	4.32034		#N/A
SNAI1	ENSG00000124216	SNAI1	2.17549	0.00921589		6.90185	6.27207	4.03364	5.07531	4.89685	5.79729	5.93587	5.45006	5.4152	5.41226	8.61459	8.34625		#N/A
ADGRL4	ENSG00000162618	ADGRL4	2.76928	0.0093276		8.28819	8.58463	4.26557	4.20762	4.35142	4.75963	5.02719	4.49401	5.32529	5.58216	4.01567	4.01957		#N/A
GPR108	ENSG00000125734	GPR108	0.540256	0.0093276		9.34195	9.25614	8.49221	8.26324	8.52593	8.31785	8.67644	8.648	9.03082	8.95116	8.80988	8.69275		#N/A
FN1	ENSG00000115414	FN1	1.9461	0.00948547		18.17	18.3147	15.807	15.9896	15.8507	16.2975	14.2732	14.2394	17.6378	17.9443	15.3291	15.364		#N/A
TGFB2	ENSG00000092969	TGFB2	1.80873	0.00948547		9.79286	9.98933	6.99745	6.8196	7.89768	8.59621	7.02716	7.15544	9.55721	9.86937	7.29085	7.4671		#N/A
MANSC1	ENSG00000281818	MANSC1	-0.699115	0.00948547		8.06354	7.87316	9.32195	8.95478	9.16138	8.44698	8.94849	8.70708	8.31916	8.28853	8.70996	8.15494		#N/A
FGF1	ENSG00000113578	FGF1	2.98485	0.00948547		7.62221	7.99267	4.40176	4.93862	3.86308	4.60719	2	2.52735	5.83997	6.16703	4.82525	4.32034		#N/A
BRI3	ENSG00000164713	BRI3	0.368331	0.00948547		8.71853	8.70285	8.46526	8.32624	8.20333	8.42435	8.31186	8.16198	8.74613	8.81288	8.46024	8.64613		#N/A
WNT5B	ENSG00000111186	WNT5B	0.738007	0.00948547		7.64738	7.58517	6.78968	6.36593	7.10486	7.05557	7.20913	6.95452	7.88806	7.89584	7.7209	7.02175		#N/A
MSRB3	ENSG00000174099	MSRB3	1.06084	0.00948547		6.88784	7.32379	5.54982	5.72145	5.96851	6.34724	5.99969	6.09649	7.02599	7.52057	5.76347	6.79632		#N/A
RAB36	ENSG00000100228	RAB36	-0.643111	0.00948547		6.88784	6.59346	7.53061	7.37092	7.6423	7.67955	7.44134	7.11008	6.75466	7.05592	6.45286	7.21667		#N/A
NAGS	ENSG00000161653	NAGS	1.27983	0.00948547		5.51126	5.27473	4.03364	3.71623	3.97486	3.75566	4.08067	4.31368	5.29403	5.11277	4.21798	4.51081		#N/A
COL19A1	ENSG00000082293	COL19A1	2.21209	0.00948547		3.2897	3.77003	2.96503	2.81715	3.30185	2.42174	2.54738	2.73285	4.28307	3.22064	4.94413	4.67905		#N/A
SEMA7A	ENSG00000288455	SEMA7A	2.19719	0.00961141		11.3854	11.6441	8.2339	9.19877	7.59059	8.73603	6.95387	7.16434	9.33527	9.82138	7.94176	8.58388		#N/A
CCSAP	ENSG00000154429	CCSAP	-0.53973	0.009695		7.89864	7.71	8.31808	8.70113	8.7663	8.41863	8.62341	8.64482	8.06051	8.46729	8.07366	8.02563		#N/A
FAM234A	ENSG00000167930	FAM234A	-0.278248	0.00996351		10.1195	10.1849	10.5813	10.5342	10.5563	10.6437	10.4304	10.3701	10.3153	10.2274	10.3282	10.2717		#N/A
FSTL3	ENSG00000070404	FSTL3	0.993202	0.00996351		9.05585	9.10266	7.52316	7.81838	8.23736	8.38971	7.7065	7.38606	9.17292	9.21935	8.18246	8.02041		#N/A
PABIR3	ENSG00000156500	PABIR3	-0.605946	0.00996351		5.97606	5.75864	6.60447	6.71885	6.89351	6.78054	6.36533	6.7089	6.31513	6.05601	6.12399	6.30726		#N/A
DENND5B	ENSG00000170456	DENND5B	-0.599583	0.0101825		9.20739	9.04061	9.79833	9.62626	10.0229	9.89482	10.2801	10.3191	9.61368	9.58692	9.36769	9.57989		#N/A
ADTRP	ENSG00000111863	ADTRP	2.98386	0.0103841		4.76109	5.47567	3.6518	3.44059	2	2	2.2995	2	4.28307	3.58292	5.15601	4.32034		#N/A
DNALI1	ENSG00000163879	DNALI1	-0.743828	0.0104241		8.32505	8.43188	8.62687	9.28587	8.95193	9.37519	9.35248	9.80636	8.39478	8.54643	8.49636	8.9611		#N/A
PGBD2	ENSG00000185220	PGBD2	-0.474329	0.0105691		7.03496	7.16807	7.58169	7.70179	7.47176	7.68907	7.66118	7.84508	6.96775	7.15353	7.34947	7.45942		#N/A
LMCD1	ENSG00000071282	LMCD1	1.41641	0.0106033		8.69055	9.19575	6.45591	6.83893	6.44688	7.31135	6.65679	6.68435	7.48631	7.93559	6.62882	7.4671		#N/A
ZNF880	ENSG00000221923	ZNF880	0.762128	0.0106516		8.54636	8.45188	7.84926	7.89427	7.78717	7.39522	7.42594	6.7089	7.9645	8.19992	8.32438	8.32103		#N/A
SCNN1B	ENSG00000168447	SCNN1B	5.11787	0.0107264		4.76109	3.55015	2	2	2	2	2	2	2.89481	2.41427	2.49142	2.30448		#N/A
EXOC6	ENSG00000138190	EXOC6	-0.396346	0.010779		8.11256	8.04628	8.75639	8.64731	8.75851	8.46373	8.5578	8.48343	8.21035	8.395	8.39217	8.15969		#N/A
MT-CO1	ENSG00000198804	MT-CO1	0.468261	0.0108829		18.3992	18.3128	18.1033	18.1817	18.0944	18.3237	17.9729	17.9456	18.7935	18.8953	18.5179	18.4515		#N/A
CCND2	ENSG00000118971	CCND2	0.616322	0.0110049		11.292	10.9348	10.4441	10.6773	11.0054	10.6954	10.1723	10.0408	11.0849	11.1635	11.2477	11.1938		#N/A
LINC02577	ENSG00000228742	LINC02577	4.75772	0.0111714		4.4153	4.90855	2	2	2	2	2.54738	2	2.71767	3.73482	2.49142	2.30448		#N/A
COL9A3	ENSG00000092758	COL9A3	1.20086	0.011239		10.3141	10.3085	8.58097	8.69318	7.52782	7.85906	8.59615	8.75207	9.08205	8.98565	8.95615	9.12306		#N/A
SERTAD3	ENSG00000167565	SERTAD3	-0.384907	0.0114094		8.37613	8.4034	8.72427	8.7247	8.58878	8.82081	8.5038	8.71012	8.28379	8.48347	8.078	8.16443		#N/A
SMIM10L2A	ENSG00000178947	SMIM10L2A	-1.19504	0.0114254		4.82131	4.81281	6.18094	6.00431	6.92168	6.78054	7.08714	6.69667	6.29948	5.58216	5.88734	5.12995		#N/A
KCNK6	ENSG00000099337	KCNK6	1.94658	0.0114874		9.57624	9.63072	7.43859	7.41023	6.6288	6.86701	5.75046	5.19592	8.34608	8.34275	6.93665	6.75925		#N/A
DYSF	ENSG00000135636	DYSF	1.87217	0.0114984		9.31603	9.47914	7.51567	7.30988	6.6288	6.85013	5.75046	5.3906	8.38369	8.72489	6.9174	6.55809		#N/A
ENSG00000258053	ENSG00000258053	ENSG00000258053	2.21989	0.0116226		3.72754	3.55015	2.30804	2.25154	3.30185	2.42174	2.75886	3.07258	4.76568	3.9977	4.21798	3.40316		#N/A
COLGALT2	ENSG00000198756	COLGALT2	-2.20199	0.0116605		4.33496	4.65611	5.5202	5.78263	6.04735	6.5903	8.81591	8.63845	5.60546	5.54152	5.69731	6.08559		#N/A
FAM198B-AS1	ENSG00000248429	FAM198B-AS1	1.70503	0.0116605		5.94932	5.27473	4.64076	4.08344	4.43199	3.43174	3.99975	3.68095	6.40566	5.80451	4.74018	3.93344		#N/A
ABTB1	ENSG00000114626	ABTB1	1.25268	0.0117596		7.51689	7.58517	6.21832	6.18136	5.45485	5.43919	5.77498	5.29654	7.01644	6.56185	6.70935	5.5902		#N/A
AK9	ENSG00000155085	AK9	-0.725852	0.0118929		6.24147	5.95081	7.40656	7.35758	7.42331	7.15516	7.62791	7.2421	6.88625	6.90393	6.92706	6.84431		#N/A
MTCO1P12	ENSG00000237973	MTCO1P12	0.657224	0.0118929		7.89163	7.44849	6.80204	6.62173	7.17676	7.40682	7.3707	7.18199	7.84017	8.04865	7.53137	7.71311		#N/A
LINC01088	ENSG00000249307	LINC01088	2.26735	0.0118929		5.18439	5.27473	3.13102	3.79753	2.91018	2	3.72559	4.43637	6.06034	6.14007	4.39538	3.74403		#N/A
DPP10-AS1	ENSG00000235026	DPP10-AS1	2.4379	0.0119383		4.06298	4.76244	2.96503	2.25154	4.07861	3.43174	2.2995	2.28764	5.26208	5.36647	4.50258	3.63911		#N/A
TAP2	ENSG00000225967	TAP2	1.35985	0.0121421		8.05102	8.29685	6.18094	6.71885	6.66258	7.28647	5.02719	5.42063	7.14464	7.47813	7.30573	7.71955		#N/A
TRIM49	ENSG00000168930	TRIM49	5.88288	0.0122439		3.59583	4.28005	2	2	2	2	2	2	4.40513	4.80473	2	2		#N/A
COA3	ENSG00000183978	COA3	-0.411897	0.012328		8.07595	7.68993	8.43382	8.17472	8.48875	8.19619	8.4779	8.46913	7.91912	8.02673	8.0693	8.03082		#N/A
TMEM200A	ENSG00000164484	TMEM200A	1.88774	0.0123379		9.7891	10.0808	6.342	7.60912	6.75943	7.29896	6.60302	6.79167	7.59931	8.11246	7.0992	7.093		#N/A
IQCE	ENSG00000106012	IQCE	-0.410284	0.0123379		9.01775	9.05638	9.72069	9.26279	9.5455	9.58873	9.68563	9.45191	9.26849	9.13992	9.34085	8.98538		#N/A
TMEM35A	ENSG00000126950	TMEM35A	-0.981496	0.0123379		5.27331	4.95414	6.50211	6.22609	6.46614	6.16809	6.75867	6.56839	6.0227	5.54152	6.1071	4.82969		#N/A
DOCK5	ENSG00000147459	DOCK5	2.28668	0.0124515		11.1124	11.3553	7.73785	7.93975	7.58179	8.04859	7.29641	7.45299	8.45608	9.08088	6.94618	7.17973		#N/A
FN3K	ENSG00000167363	FN3K	-0.655015	0.0125112		7.02219	6.69093	7.90763	7.84253	7.73255	7.16884	7.8519	7.39365	7.1878	6.8044	7.36376	7.03215		#N/A
IRF8	ENSG00000140968	IRF8	1.91966	0.0126651		6.44657	5.75864	4.98236	4.82688	4.26609	4.89749	3.5088	3.46734	6.7887	7.02678	4.50258	4.67905		#N/A
ADH6	ENSG00000172955	ADH6	1.02776	0.0126651		5.58259	4.71026	4.6948	4.74726	4.71562	4.02002	4.15728	4.10755	5.12669	5.54152	5.34071	5.56177		#N/A
ADAM28	ENSG00000042980	ADAM28	1.22602	0.0129155		9.44842	9.67223	8.06466	8.0224	7.47176	7.26114	7.50136	7.13746	7.94451	7.80435	8.55045	8.54084		#N/A
TGM2	ENSG00000198959	TGM2	1.79093	0.012927		11.6212	11.6661	9.35798	9.64423	8.76241	9.87618	7.66774	7.82837	10.7691	10.9218	9.0475	9.2532		#N/A
OSMR	ENSG00000145623	OSMR	1.94799	0.012944		10.4165	10.4455	7.73785	7.44849	7.72457	7.88415	6.85383	6.73304	8.90198	9.00819	7.17408	6.82052		#N/A
SLC7A7	ENSG00000155465	SLC7A7	1.5487	0.012944		7.3934	7.35811	5.3622	5.36926	4.35142	5.39331	4.94313	5.23025	6.49083	6.31902	4.94413	5.53278		#N/A
TNS2	ENSG00000111077	TNS2	1.08439	0.012944		6.73968	6.69093	5.06675	5.00859	5.15599	4.34327	5.64798	5.73939	5.72748	6.02687	5.96437	6.00343		#N/A
ZNF236-DT	ENSG00000264278	ZNF236-DT	1.8285	0.012944		4.93469	3.86855	3.53815	3.44059	2.91018	3.23767	2.2995	2.73285	4.67153	4.41255	3.9414	3.74403		#N/A
CSMD3	ENSG00000164796	CSMD3	3.02565	0.0129575		7.09718	7.14859	2.96503	3.09955	4.26609	4.02002	3.38682	2	5.05391	4.73436	4.08631	2.95597		#N/A
GFOD1	ENSG00000145990	GFOD1	2.1015	0.0131348		6.72399	7.5779	4.6948	5.74213	4.77859	5.29691	2.94326	4.03173	6.463	7.64085	5.18848	4.96609		#N/A
KIAA0895	ENSG00000164542	KIAA0895	-0.775984	0.0133151		6.78575	6.79482	7.3655	7.70179	8.36083	8.07062	8.17575	8.18404	7.53392	7.37783	7.41954	7.40445		#N/A
FAM20C	ENSG00000281429	FAM20C	2.06698	0.0133535		9.65281	9.3401	6.25475	6.2407	6.19317	6.79825	6.19406	6.44228	7.9744	7.57191	5.94549	5.56177		#N/A
KIF3B	ENSG00000101350	KIF3B	-0.414228	0.0135179		10.1014	10.0601	10.4773	10.3324	10.2412	10.4556	10.1182	10.1344	9.90113	9.80431	9.71564	9.68905		#N/A
SCARF2	ENSG00000244486	SCARF2	-0.755707	0.0135633		6.67588	6.56436	6.59028	7.06098	7.26737	7.35987	7.22701	7.43102	5.88263	6.67888	6.09001	6.65546		#N/A
WNT9A	ENSG00000143816	WNT9A	2.9928	0.0135847		9.72552	9.85458	6.04192	6.7901	5.33426	5.8321	4.08067	4.03173	7.24613	8.04138	5.4519	5.5902		#N/A
CABLES2	ENSG00000149679	CABLES2	-0.759374	0.0135847		7.92632	7.71	8.67807	7.885	9.18191	8.96109	8.95118	8.80142	8.33844	7.88776	8.20247	8.0967		#N/A
SCN9A	ENSG00000169432	SCN9A	2.04471	0.0135847		6.96994	7.02587	4.26557	4.08344	4.07861	4.02002	4.48911	3.86697	4.93736	5.41226	4.15365	4.17778		#N/A
LINC01198	ENSG00000231817	LINC01198	3.41316	0.0137567		2.90062	3.29064	2	2.25154	2	2.42174	2	2.52735	3.55266	2.99847	3.14892	4.25082		#N/A
ZDHHC20	ENSG00000180776	ZDHHC20	-0.26924	0.0138293		10.989	10.9455	11.0822	11.1562	11.329	11.1334	11.1634	11.1945	10.9826	10.9742	10.7837	10.768		#N/A
PDGFRB	ENSG00000113721	PDGFRB	0.81531	0.0138904		7.16846	6.76954	6.30773	6.00431	6.6116	6.72605	6.73387	6.60808	7.10015	7.01198	7.68151	7.79476		#N/A
HDAC9	ENSG00000048052	HDAC9	1.69822	0.0138987		9.67338	10.1559	7.23482	7.29596	7.19995	7.90065	6.73387	6.5413	7.91912	8.14673	7.49288	7.48991		#N/A
RIMKLA	ENSG00000177181	RIMKLA	-2.18941	0.0138987		3.59583	2.56766	4.33527	3.44059	3.74189	4.24336	5.84614	5.29654	3.55266	2.73574	3.39138	2.7697		#N/A
WNK4	ENSG00000126562	WNK4	1.65719	0.0139303		9.99593	9.93778	7.28852	7.28895	7.65914	8.26149	6.53286	6.72102	8.61314	8.63601	7.46664	7.59183		#N/A
ENSG00000264007	ENSG00000264007	ENSG00000264007	4.06694	0.0139306		4.87912	4.41659	2	2	2	2.42174	2.75886	2	2.89481	4.21999	2.26653	3.26893		#N/A
FBXL16	ENSG00000127585	FBXL16	2.51189	0.013935		5.94932	5.47567	2.56175	2.81715	2.37082	3.43174	3.62126	2.91269	4.67153	3.41312	3.27524	3.63911		#N/A
CAMSAP3	ENSG00000076826	CAMSAP3	-0.38693	0.0141729		9.35729	9.4031	9.68442	9.79537	9.76355	10.0133	9.70331	9.42437	9.44428	9.28544	9.41648	9.20346		#N/A
XKR4	ENSG00000206579	XKR4	2.08162	0.0142904		7.53499	7.20625	5.57885	4.70574	4.58076	5.8321	3.5088	4.10755	7.23794	7.30687	4.69569	4.78121		#N/A
CLTCL1	ENSG00000070371	CLTCL1	-0.959209	0.0142948		5.866	6.03807	6.72623	6.28367	6.57659	6.16809	7.47166	7.16434	5.70389	5.54152	6.31258	5.77488		#N/A
DDIT4L	ENSG00000145358	DDIT4L	1.29155	0.0146247		4.82131	4.99833	4.89273	4.70574	4.43199	4.60719	4.85386	4.92963	6.53161	5.73413	6.59288	5.82358		#N/A
MSANTD4	ENSG00000170903	MSANTD4	-0.414911	0.0148317		8.64962	8.78398	8.72751	8.896	9.11332	9.27754	9.01947	9.20245	8.6902	8.50477	8.62946	8.54448		#N/A
MT-ND4	ENSG00000198886	MT-ND4	0.657228	0.0150148		18.0529	17.8996	17.7525	17.7446	17.1599	17.3536	17.0205	16.9842	18.1636	18.4063	17.7707	17.7642		#N/A
MTATP6P1	ENSG00000248527	MTATP6P1	0.564205	0.0150148		14.8003	14.7662	14.445	14.5493	14.063	14.2711	13.8868	13.9083	14.7565	15.1371	14.4918	14.6063		#N/A
LIMCH1	ENSG00000064042	LIMCH1	-0.615496	0.0150148		9.92909	9.67394	10.6658	10.0067	10.904	10.5117	10.8596	10.5692	10.3394	10.109	10.042	9.81482		#N/A
PRRT2	ENSG00000167371	PRRT2	-1.11304	0.0150591		7.04762	7.02587	7.52316	7.47962	8.15074	7.99583	9.24248	8.76968	7.31782	6.87151	7.65852	7.40445		#N/A
RND1	ENSG00000172602	RND1	1.82338	0.0150591		8.23936	8.4116	5.32841	4.90233	6.1221	5.72504	5.70013	4.97082	6.25146	6.08458	6.31258	5.56177		#N/A
COL16A1	ENSG00000084636	COL16A1	1.53333	0.0151737		10.0551	9.98384	8.2339	8.28455	8.24295	8.85082	6.87667	6.49969	9.76669	9.90184	8.34972	8.27799		#N/A
TRIM47	ENSG00000132481	TRIM47	3.6421	0.0151737		6.70813	6.64996	2.30804	2.65209	3.30185	3.60277	2	2.28764	3.74986	2.99847	3.39138	2.55576		#N/A
SP110	ENSG00000135899	SP110	0.866233	0.0155285		7.03496	6.64996	6.68677	5.952	6.23868	5.76161	5.75046	5.26377	6.89669	7.01198	6.86814	6.48429		#N/A
MT-ATP8	ENSG00000228253	MT-ATP8	0.695722	0.0157117		13.9067	13.8251	13.5007	13.8305	13.168	13.3704	13.0708	12.929	14.1903	14.5638	13.7434	13.8226		#N/A
ZNF415	ENSG00000170954	ZNF415	-0.478259	0.0158871		7.62221	7.68318	8.12002	8.1165	7.81748	7.74495	8.11461	7.82837	7.57351	7.54132	7.36376	7.17035		#N/A
BST1	ENSG00000109743	BST1	1.25982	0.0158871		6.69209	6.63604	5.32841	5.00859	4.83894	4.75963	4.48911	4.79852	6.06034	5.83845	4.98167	5.20539		#N/A
ENO4	ENSG00000188316	ENO4	-1.55955	0.0158871		2.90062	2.78507	4.19232	3.71623	4.1754	4.24336	4.89918	4.79852	3.19475	3.87224	3.39138	3.40316		#N/A
GALNT10	ENSG00000164574	GALNT10	1.36903	0.0160445		9.92051	9.96726	8.00709	8.06406	7.68403	7.86747	7.62116	6.91286	8.56157	8.80002	8.04734	7.74506		#N/A
PPP4R2	ENSG00000163605	PPP4R2	-0.314113	0.0161134		10.285	10.2446	10.3388	10.479	10.4222	10.5553	10.6343	10.7173	10.113	10.2854	10.0987	10.2684		#N/A
MYL9	ENSG00000101335	MYL9	1.41039	0.0162237		12.3805	12.46	10.1486	10.3786	10.1915	10.9264	9.49951	9.99285	11.5125	11.622	9.8435	10.5209		MYL9
WIPF1	ENSG00000115935	WIPF1	0.967987	0.0162237		9.38249	9.00044	7.88457	6.73957	8.36083	8.00349	8.02033	7.53766	8.65064	8.59688	8.63536	8.20175		#N/A
ADAMTS9-AS1	ENSG00000241158	ADAMTS9-AS1	2.04824	0.0162237		5.74685	6.03807	3.13102	3.63007	2.91018	4.34327	3.38682	4.24819	5.09076	6.11259	3.69244	3.74403		#N/A
SELL	ENSG00000188404	SELL	-1.09977	0.0162237		3.84823	3.55015	5.10716	4.93862	4.35142	4.60719	4.80707	5.26377	4.14973	3.87224	4.33864	4.01957		#N/A
BEND6	ENSG00000151917	BEND6	0.744604	0.0163715		7.53499	7.56327	6.57596	6.8485	7.25635	6.70742	6.08061	6.22119	7.40818	7.18024	7.43315	7.1322		#N/A
TXK	ENSG00000074966	TXK	-1.11915	0.0163999		6.91573	7.15836	8.04918	9.14541	8.2706	8.78127	7.16342	8.01221	7.02599	7.38933	6.90768	7.92878		#N/A
NETO1	ENSG00000166342	NETO1	3.35853	0.0164523		7.71243	7.80637	3.6518	3.71623	3.97486	3.89388	2.75886	2.52735	3.19475	4.58241	3.01047	2.7697		#N/A
BACH2	ENSG00000112182	BACH2	1.16347	0.016623		9.02737	9.26295	7.23482	7.13323	7.31063	8.14172	7.40252	7.27535	8.40579	8.91185	7.78601	7.28781		#N/A
TRIM43B	ENSG00000144010	TRIM43B	5.39173	0.016623		3.2897	4.04746	2.30804	2	2	2	2	2	4.62204	4.87182	2	2		#N/A
GPC6	ENSG00000183098	GPC6	1.08147	0.0167475		12.2122	12.182	10.1217	10.1471	11.0078	11.1636	10.699	10.7368	11.9179	12.0923	10.763	10.7341		#N/A
TRIM5	ENSG00000132256	TRIM5	0.34515	0.0169005		9.4603	9.24013	9.33689	9.18183	9.18772	8.96109	9.03985	9.07132	9.59617	9.53611	9.47195	9.54401		#N/A
TSHZ3	ENSG00000121297	TSHZ3	1.6952	0.0169584		7.79733	8.25648	4.26557	4.78762	6.44688	6.74444	5.59387	5.26377	5.81817	7.20647	7.22193	6.91343		#N/A
P2RX6	ENSG00000099957	P2RX6	-1.74317	0.0170662		3.59583	2.97397	4.46533	3.87449	4.71562	5.34592	5.50871	5.61502	3.32417	3.22064	4.60237	3.52595		#N/A
TMPRSS2	ENSG00000184012	TMPRSS2	1.05669	0.0170838		7.2141	7.22497	6.59028	6.35254	5.6014	5.24619	6.38139	6.00031	7.56043	7.27003	7.0292	6.00343		#N/A
TNC	ENSG00000041982	TNC	1.78014	0.0171198		12.7171	12.8202	9.95323	9.8783	10.0423	10.6449	9.52323	9.59213	11.2929	11.5329	9.56146	9.41687		#N/A
PARVA	ENSG00000197702	PARVA	0.612104	0.0171198		10.6554	10.8172	9.79833	10.0581	9.60318	9.82309	9.62116	9.64557	10.225	10.4049	9.92164	10.0272		#N/A
TP53BP1	ENSG00000067369	TP53BP1	-0.341416	0.0172473		11.1736	10.9191	11.3805	11.2969	11.236	11.1721	11.5241	11.4457	11.1365	11.0082	10.9692	10.8056		#N/A
NRXN1	ENSG00000179915	NRXN1	-1.94682	0.0173392		4.63254	5.34487	6.42427	6.70837	7.86903	7.73578	9.35857	9.31668	6.40566	6.78712	6.94618	7.073		#N/A
CSAG3	ENSG00000268916	CSAG3	-3.8407	0.0174502		2	2	4.89273	5.20016	3.30185	4.34327	3.5088	2.91269	3.32417	2	2	2		#N/A
ARL4A	ENSG00000122644	ARL4A	-0.927836	0.017534		7.58795	7.58517	9.54612	9.35128	8.49345	8.83804	8.48905	9.17628	8.37251	8.64082	7.73746	8.42726		#N/A
IL20RB	ENSG00000174564	IL20RB	2.3262	0.017534		7.81965	7.51084	5.10716	5.20016	3.86308	3.43174	3.72559	4.10755	5.26208	5.69761	4.08631	4.87661		#N/A
CPXM2	ENSG00000121898	CPXM2	2.72179	0.017534		6.87369	7.39164	3.75714	3.94755	4.77859	4.136	2.54738	2.28764	5.44396	6.02687	4.21798	3.12092		#N/A
NFATC1	ENSG00000131196	NFATC1	1.19997	0.017534		7.18	6.84408	4.58462	5.39561	5.10775	5.5268	5.02719	5.5621	5.60546	5.69761	6.15718	5.84733		#N/A
NOX3	ENSG00000074771	NOX3	4.83812	0.017534		4.93469	5.70631	2	2.25154	2	2	2	2.52735	2.51569	2.99847	2.26653	2.30448		#N/A
RORB	ENSG00000198963	RORB	-1.84614	0.0175403		4.76109	4.86147	6.60447	4.82688	7.35263	6.22159	8.06576	7.21664	5.32529	3.87224	6.39837	5.24168		#N/A
SFRP1	ENSG00000104332	SFRP1	1.74572	0.0176649		13.3778	13.3142	10.6717	11.5352	11.0924	11.9549	9.36868	9.74536	12.8207	13.1249	10.9866	11.0147		#N/A
ADAM19	ENSG00000135074	ADAM19	1.69409	0.0176649		12.56	12.5569	9.87494	9.68219	10.0423	10.443	9.46602	9.25966	11.045	11.0576	9.55835	9.58166		#N/A
PCDH15	ENSG00000150275	PCDH15	-1.7217	0.0177419		3.2897	2.56766	4.79715	4.82688	6.02155	5.96351	5.21813	6.02007	4.14973	3.87224	4.78334	4.73103		#N/A
MFGE8	ENSG00000140545	MFGE8	0.806712	0.0178681		12.9893	13.044	11.5334	11.7071	11.8494	12.152	11.6135	11.8136	12.6256	12.7367	11.7542	11.9767		#N/A
CRMP1	ENSG00000072832	CRMP1	1.70296	0.0178681		10.8341	10.8424	7.98014	7.33052	8.13879	8.58094	8.34908	7.95178	9.29043	9.0985	8.06056	7.77632		#N/A
FST	ENSG00000134363	FST	1.0794	0.0178681		7.31179	7.83102	6.96484	7.27482	6.28279	6.41769	5.89171	6.64672	7.94451	8.42324	6.87812	7.30506		#N/A
SULT1A1	ENSG00000196502	SULT1A1	-2.18336	0.0179498		4.5637	3.66427	6.67338	5.98709	8.63206	8.36615	9.13528	8.61266	6.33062	5.45665	7.3779	6.60063		#N/A
GRIK1	ENSG00000171189	GRIK1	-1.6223	0.0180491		3.84823	3.42622	5.32841	5.25876	4.89685	3.89388	6.34909	6.2715	4.51765	4.58241	4.39538	3.93344		#N/A
RPL10P9	ENSG00000233913	RPL10P9	2.24277	0.0180834		8.72643	8.57736	5.06675	3.79753	4.89685	5.56869	5.449	6.02007	5.57977	5.69761	5.84722	5.67226		#N/A
AFAP1L2	ENSG00000169129	AFAP1L2	1.57418	0.0181874		10.2222	10.1213	8.36467	8.50025	8.04584	8.41289	6.97519	5.91847	9.46373	9.46727	8.46024	8.19714		#N/A
FBXO32	ENSG00000156804	FBXO32	2.18354	0.0183748		8.63291	9.08995	5.6073	6.41828	5.00615	5.64898	4.85386	5.32858	6.463	6.69749	4.94413	5.64542		#N/A
ATP1B2	ENSG00000129244	ATP1B2	-2.12836	0.0187458		3.45087	3.55015	3.13102	3.09955	5.15599	5.02333	5.53766	6.03955	3.05256	3.58292	3.49887	3.26893		#N/A
ITGB6	ENSG00000115221	ITGB6	1.85186	0.0187932		12.0116	12.3793	8.64757	10.5519	9.14354	10.4345	7.89169	8.93749	10.8706	11.6711	9.09538	10.3774		#N/A
TAF11L12	ENSG00000249156	TAF11L12	5.2422	0.0187932		3.9596	4.54132	2.30804	2	2	2	2	2	4.51765	3.58292	2	2		#N/A
ERG	ENSG00000157554	ERG	4.49282	0.0187932		2	2.97397	2	2	2	2	2	2.52735	3.44293	2.99847	4.01567	4.62512		#N/A
PLAAT3	ENSG00000176485	PLAAT3	0.845906	0.0188904		9.20174	8.96469	7.67202	7.68051	7.50938	7.6603	8.25197	8.00232	8.58436	8.79138	8.06494	7.8893		#N/A
SCARF1	ENSG00000276336	SCARF1	2.36947	0.0194062		7.52597	6.91496	3.85531	4.14686	4.07861	4.43671	3.91402	3.07258	4.57079	3.87224	4.27957	4.51081		#N/A
GABRA5	ENSG00000186297	GABRA5	1.75333	0.0194062		5.54736	5.65202	2.96503	3.09955	3.11927	4.24336	3.62126	4.31368	4.07814	5.49971	4.33864	4.32034		#N/A
TRIM43	ENSG00000144015	TRIM43	5.22074	0.0194062		4.06298	3.55015	2.30804	2	2	2	2	2	4.62204	4.31948	2	2		#N/A
ELFN1	ENSG00000225968	ELFN1	0.709628	0.0194988		6.24147	6.19821	5.06675	5.39561	5.82671	5.34592	5.449	5.08776	6.09703	5.76975	5.74175	6.06549		#N/A
POLD4	ENSG00000175482	POLD4	1.30653	0.0195409		6.98318	6.80729	5.22203	5.25876	5.29171	5.02333	4.65683	4.49401	6.06034	6.11259	5.4249	4.92204		#N/A
FAM90A27P	ENSG00000189348	FAM90A27P	5.3405	0.0195409		3.9596	3.29064	2.30804	2	2	2	2	2	4.07814	5.1672	2	2		#N/A
MYPN	ENSG00000138347	MYPN	-2.69099	0.0195969		3.84823	4.34994	3.94723	6.40537	4.83894	6.29828	6.88795	7.50998	2	2.41427	4.21798	5.16816		#N/A
OTX2	ENSG00000165588	OTX2	-5.8151	0.0197542		2	2	2.30804	2	5.45485	4.02002	8.39726	8.21864	3.05256	2	3.27524	2.55576		#N/A
BMP1	ENSG00000168487	BMP1	1.66916	0.0198088		11.8776	12.0803	9.11952	9.48921	9.4301	10.1403	8.81887	8.90333	10.7811	10.8653	9.0475	8.95017		#N/A
BAZ1B	ENSG00000009954	BAZ1B	-0.239019	0.0198186		11.554	11.5126	11.6474	11.6398	11.8644	11.843	11.8458	11.7544	11.5248	11.4113	11.5773	11.5879		#N/A
TANC2	ENSG00000170921	TANC2	0.567317	0.0198186		11.1837	11.1889	10.3786	10.3678	10.4491	10.6523	10.1997	10.2424	10.9765	11.1933	10.472	10.5264		#N/A
PTPRR	ENSG00000153233	PTPRR	2.43345	0.0198186		6.83039	7.7298	3.85531	5.25876	4.71562	5.60939	3.25356	3.46734	6.95781	7.72492	3.78029	4.17778		#N/A
PSORS1C1	ENSG00000235487	PSORS1C1	2.80095	0.0198186		5.13779	4.65611	3.27987	2.65209	2	2.42174	2.2995	2.52735	3.83919	4.49998	2.68593	2.7697		#N/A
KRT7	ENSG00000135480	KRT7	1.48176	0.0198459		14.3171	14.3462	12.7402	12.9271	12.2726	12.7201	10.8865	10.8781	13.867	13.9631	12.5089	12.5621		#N/A
ENSG00000258168	ENSG00000258168	ENSG00000258168	3.46586	0.0198459		3.84823	4.04746	2	2.65209	2	2	2.2995	2	3.32417	2.73574	3.39138	2.7697		#N/A
PHACTR3	ENSG00000087495	PHACTR3	3.43429	0.0200296		3.9596	3.96078	2	2.65209	2.37082	2	2	2	3.44293	2.99847	3.01047	2.7697		#N/A
RIPOR1	ENSG00000039523	RIPOR1	0.686424	0.0201172		10.0409	10.0483	9.05384	9.13372	8.80463	9.05985	8.58232	8.75207	9.25435	9.42322	9.12923	9.37868		#N/A
NES	ENSG00000132688	NES	1.53797	0.0202119		14.5482	14.6004	11.6123	11.8941	12.2422	12.6899	11.6517	11.776	12.8235	13.031	11.9412	12.1445		#N/A
NKX3-1	ENSG00000167034	NKX3-1	1.57441	0.0202296		6.32704	7.09872	4.52621	4.86509	5.24787	5.60939	3.38682	4.03173	5.05391	5.58216	6.0375	6.2726		#N/A
CDH3	ENSG00000062038	CDH3	0.65447	0.0203694		12.971	13.0918	12.2051	12.2684	11.76	11.8913	11.74	11.8558	12.4386	12.5662	12.2007	12.2175		#N/A
SSBP2	ENSG00000145687	SSBP2	-0.660069	0.0203694		8.29882	7.78129	8.97687	8.98979	9.25293	9.17619	9.39858	9.36382	8.9579	8.73393	8.7211	8.51142		#N/A
SPA17	ENSG00000064199	SPA17	-0.905637	0.0203694		6.10278	5.90511	6.76463	7.02767	7.40347	7.08473	7.36263	7.54449	5.52697	6.36632	6.8979	6.80847		#N/A
OR2I1P	ENSG00000231973	OR2I1P	1.97205	0.020457		6.00231	5.75864	2.56175	3.22241	3.46391	4.96178	3.38682	3.07258	4.28307	4.41255	5.12278	4.82969		#N/A
TMEM154	ENSG00000170006	TMEM154	1.71489	0.020466		9.02417	9.022	6.77721	6.8293	7.01617	6.56982	5.38672	4.75202	7.4227	7.66942	6.90768	6.70829		#N/A
THBD	ENSG00000178726	THBD	2.51858	0.0205886		7.12133	6.85614	2.77744	3.09955	3.46391	5.08235	2.94326	3.9517	5.47217	4.99732	3.9414	3.63911		#N/A
DYRK1B	ENSG00000281320	DYRK1B	-0.475152	0.0209319		8.72643	8.79968	9.37463	9.09203	8.92086	8.79457	9.29217	9.43361	8.65987	8.71121	8.8306	8.44682		#N/A
A4GALT	ENSG00000128274	A4GALT	2.73689	0.0211602		6.32704	6.80729	4.40176	3.09955	3.11927	3.89388	2.94326	2	5.65551	4.99732	3.14892	3.52595		#N/A
MICAL2	ENSG00000133816	MICAL2	2.14699	0.02127		10.1374	10.4152	7.58169	7.53992	7.25635	7.95693	4.85386	5.04982	8.58758	8.82563	7.16595	7.38024		#N/A
COL25A1	ENSG00000188517	COL25A1	1.68342	0.0213203		9.70369	9.6654	6.35884	6.73957	7.50006	8.38386	5.93587	6.49969	8.03237	8.58193	7.58113	7.69359		#N/A
ENSG00000287862	ENSG00000287862	ENSG00000287862	2.4864	0.0213203		5.47423	5.08285	3.6518	3.22241	2.91018	2	2	2.91269	4.67153	4.31948	3.5989	3.12092		#N/A
USP32	ENSG00000170832	USP32	-0.357817	0.0214117		9.90494	9.80568	10.2366	10.0786	10.513	10.3885	10.1952	10.1856	10.0559	10.0594	9.90708	9.73433		#N/A
NBL1	ENSG00000158747	NBL1	1.65909	0.0216403		8.3041	8.47161	5.91108	6.11946	5.45485	6.24761	5.28795	5.3906	6.54495	6.82147	5.62797	6.02442		#N/A
ANP32E	ENSG00000143401	ANP32E	-0.429439	0.0216886		10.8755	10.6983	11.3413	11.3455	11.4882	11.1524	11.6649	11.5572	10.929	11.1577	11.0982	11.2128		#N/A
PLA2G4C	ENSG00000105499	PLA2G4C	2.95335	0.0216886		7.20282	7.34961	2.56175	2.46567	3.60958	4.52446	3.25356	3.86697	4.89632	4.58241	3.39138	2.7697		#N/A
ALDH9A1	ENSG00000143149	ALDH9A1	-0.30731	0.0216997		9.04009	8.93373	9.44726	9.29465	9.44717	9.22285	9.3484	9.27207	8.86789	9.00446	9.20261	9.13758		#N/A
ITPR3	ENSG00000096433	ITPR3	1.83584	0.0218862		12.3074	12.296	9.52016	9.35128	10.0115	10.2554	8.37337	7.99734	10.8553	10.8	9.44868	9.22854		#N/A
HOXB5	ENSG00000120075	HOXB5	-0.893487	0.0218862		8.35082	8.04101	9.57882	8.83953	9.80006	9.75215	9.96545	9.82332	9.06363	8.41201	9.42673	8.91409		#N/A
ENSG00000239665	ENSG00000239665	ENSG00000239665	1.01748	0.0218862		9.61077	9.71424	7.85521	7.86156	8.05859	8.38386	7.92494	7.75364	8.81105	8.77395	7.94652	8.24261		#N/A
WNT7A	ENSG00000154764	WNT7A	2.62676	0.0218862		8.91095	8.61333	6.39193	5.39561	4.83894	4.83021	2.75886	3.77696	6.67197	6.64092	5.31153	4.32034		#N/A
ANKRD22	ENSG00000152766	ANKRD22	-1.29765	0.0218862		5.83712	6.19821	8.46914	8.70113	6.79032	8.09232	7.52324	7.94663	6.55816	6.27011	7.23753	7.68043		#N/A
ENSG00000271553	ENSG00000271553	ENSG00000271553	1.83437	0.0219596		4.24987	3.29064	3.41478	2.46567	3.11927	2.42174	2.54738	3.46734	4.28307	4.41255	4.60237	3.74403		#N/A
SELPLG	ENSG00000110876	SELPLG	2.19515	0.021989		5.27331	6.12036	3.27987	2.81715	3.11927	4.34327	3.38682	3.21651	5.26208	5.49971	3.14892	3.26893		#N/A
EGF	ENSG00000138798	EGF	1.08297	0.0221367		5.58259	5.04121	4.52621	4.97403	4.07861	5.08235	5.21813	4.88724	5.79602	5.80451	6.55602	5.67226		#N/A
IFT52	ENSG00000101052	IFT52	-0.371699	0.0222615		8.17735	8.08778	8.54465	8.63907	8.80463	8.7543	8.83645	8.71921	8.38369	8.5153	8.38518	8.5077		#N/A
LENG8	ENSG00000276458	LENG8	0.223433	0.022499		12.3796	12.4225	12.1966	12.2446	12.1544	12.3212	12.0495	12.1114	12.4361	12.3019	12.4091	12.4752		#N/A
NR2F1-AS1	ENSG00000237187	NR2F1-AS1	-0.739059	0.022499		5.94932	6.59346	7.24391	6.71885	7.00305	7.18239	7.44898	7.43838	6.84371	6.78712	6.49241	5.96053		#N/A
ENSG00000224239	ENSG00000224239	ENSG00000224239	5.42153	0.022499		2	2	2	2	2	2	2	2	3.92331	3.41312	4.15365	4.25082		#N/A
KLK7	ENSG00000169035	KLK7	1.81166	0.022499		3.9596	3.86855	2.56175	2.65209	2.66556	3.23767	2.75886	2.73285	4.21794	3.73482	3.5989	3.12092		#N/A
ENSG00000270728	ENSG00000270728	ENSG00000270728	-0.920838	0.0226711		4.24987	4.04746	5.14648	5.22976	5.52998	5.34592	5.38672	5.71536	4.57079	4.49998	5.18848	4.67905		#N/A
HAVCR2	ENSG00000135077	HAVCR2	1.6343	0.0229575		6.91573	6.80729	4.52621	4.93862	3.97486	5.29691	3.99975	4.24819	5.6307	5.66014	4.21798	5.44212		#N/A
OLA1P1	ENSG00000278846	OLA1P1	3.2081	0.0229908		3.84823	4.41659	3.53815	4.01709	2	2.74768	2.75886	2.52735	6.60985	7.02678	2.68593	3.12092		#N/A
ID1	ENSG00000125968	ID1	-0.880794	0.0231538		10.9089	10.6601	12.7641	12.1301	12.5413	11.9204	11.885	11.4115	11.6224	11.7049	11.5393	11.0297		#N/A
IQCH	ENSG00000103599	IQCH	-0.962246	0.0231538		4.87912	3.96078	5.42749	5.39561	5.4929	5.19362	5.77498	4.92963	4.76568	3.9977	4.90558	4.45007		#N/A
CSAG1	ENSG00000198930	CSAG1	-5.26645	0.0232792		2	2	2.30804	2.96525	2	2.42174	4.15728	4.70398	2	2	2	2		#N/A
PFKP	ENSG00000067057	PFKP	1.61177	0.023321		11.9644	12.0681	9.67773	10.1364	9.51809	10.3181	8.40121	8.74318	10.9728	11.3985	9.26294	9.57812		#N/A
MMRN1	ENSG00000138722	MMRN1	-5.17554	0.0233834		2.3662	2.56766	2.30804	2	2.91018	2.74768	8.22997	7.73583	2.89481	3.22064	2.68593	2		#N/A
DOK4	ENSG00000125170	DOK4	1.25514	0.0235153		9.58278	9.05376	9.5239	8.86097	8.59317	8.18949	8.53644	7.79436	9.58006	9.08088	10.9586	10.3138		#N/A
PPM1L	ENSG00000163590	PPM1L	-0.719662	0.0237035		8.27748	7.93699	9.14643	8.71689	9.19927	8.52352	9.29852	9.17188	8.8384	8.59688	8.23393	7.79476		#N/A
GSDME	ENSG00000105928	GSDME	1.1849	0.0241441		9.72552	9.72743	8.36049	7.85207	7.61668	7.80751	7.58695	7.35529	8.73744	8.69741	8.07366	7.66046		#N/A
SHOX2	ENSG00000168779	SHOX2	-3.44042	0.0242014		5.47423	3.86855	4.40176	3.87449	8.2706	8.20949	8.88231	8.67317	5.6799	5.36647	2.49142	2.30448		#N/A
ZNF208	ENSG00000160321	ZNF208	9.87746	0.0242619		8.97199	9.03001	2	2	2	2	2	2	2	2	2.8573	3.52595		#N/A
ANO4	ENSG00000262139	ANO4	2.72568	0.0242619		7.77467	7.95952	3.75714	4.20762	4.43199	4.34327	3.82288	3.68095	4.14973	4.49998	3.27524	3.74403		#N/A
CALB2	ENSG00000282830	CALB2	3.10425	0.0249137		9.07452	9.28987	5.18475	6.00431	4.71562	5.39331	2.75886	3.46734	6.39096	6.93564	4.44998	4.92204		#N/A
TMEM131L	ENSG00000121210	TMEM131L	1.10753	0.0249137		8.39111	8.34898	5.95603	6.28367	6.74373	6.61049	6.95387	6.78014	7.31003	7.36625	7.0992	6.60063		#N/A
SPRR2F	ENSG00000244094	SPRR2F	-3.56846	0.0250707		3.10823	2.31157	2	2	5.45485	4.68542	5.14475	5.04982	2.28077	2.41427	2.26653	2.55576		#N/A
ENSG00000286696	ENSG00000286696	ENSG00000286696	2.79	0.0250878		6.7552	6.39287	3.41478	3.94755	2.66556	3.43174	3.25356	2	3.44293	4.66039	3.27524	3.84184		#N/A
DCK	ENSG00000156136	DCK	-0.338773	0.025437		8.08211	7.86124	8.22015	8.21597	8.56665	8.29307	8.38537	8.24826	7.94451	8.10551	7.97472	7.97802		#N/A
ENSG00000251136	ENSG00000251136	ENSG00000251136	0.584854	0.0254975		9.07452	9.0874	8.12002	8.33648	7.89768	8.03371	8.25197	8.42536	8.71401	8.84663	8.43678	8.27799		#N/A
FGFBP3	ENSG00000174721	FGFBP3	-1.20005	0.0255771		5.866	6.14022	6.19975	6.48115	8.25407	7.66996	7.97342	7.55807	5.94433	6.49957	6.81713	6.68212		#N/A
GPR132	ENSG00000183484	GPR132	2.55847	0.0256469		7.03496	7.34961	4.03364	4.14686	4.1754	4.02002	3.10674	2.52735	4.21794	4.93594	3.39138	3.93344		#N/A
MLF1	ENSG00000178053	MLF1	-0.870993	0.0257418		7.65567	7.6764	7.63795	8.21597	7.88343	8.22267	8.06576	8.56302	7.08196	7.58196	6.2677	6.91343		#N/A
ACTN1	ENSG00000072110	ACTN1	1.26533	0.0261842		13.5138	13.6595	11.5138	11.8833	11.3952	12.0918	10.7747	11.0012	12.2417	12.5544	11.4019	11.9591		ACTN1
MAPK14	ENSG00000112062	MAPK14	0.593357	0.0262871		10.1638	9.98659	9.91817	9.87362	9.77711	9.61895	9.52865	9.46458	10.0336	10.0359	10.486	10.8598		#N/A
AHSA2P	ENSG00000173209	AHSA2P	0.516046	0.026309		10.2011	10.0872	9.69937	9.44731	9.71205	9.26486	10.1134	9.86078	10.5183	10.1752	10.2332	10.0783		#N/A
PCDHA4	ENSG00000204967	PCDHA4	-0.40632	0.0263662		7.53499	7.6764	8.31377	7.94422	7.86178	7.88415	8.07566	7.91004	7.48631	7.47813	7.78601	7.65374		#N/A
LOXL2	ENSG00000134013	LOXL2	1.93136	0.0267192		12.5547	12.6184	8.92412	9.09605	9.93922	10.7803	8.54359	8.54609	10.7534	10.7783	9.31167	9.54401		#N/A
PDHB	ENSG00000168291	PDHB	0.359471	0.0267192		9.67542	9.60594	9.3767	9.39275	9.15842	8.96893	9.32783	9.55198	9.61685	9.74514	9.59969	9.76114		#N/A
HRH2	ENSG00000113749	HRH2	1.44709	0.0267192		7.54395	6.8681	6.08303	6.10356	5.52998	5.60939	3.62126	4.75202	6.40566	7.35456	6.28281	6.10542		#N/A
C3orf14	ENSG00000114405	C3ORF14	-0.618306	0.0267192		6.17379	6.0798	6.73914	6.57638	5.85621	6.56982	6.73387	6.55491	5.88263	5.83845	5.86742	5.84733		#N/A
USP22	ENSG00000124422	USP22	-0.255504	0.027064		11.7278	11.8764	12.0091	11.8516	12.0353	12.1185	12.0062	12.2047	11.6851	11.7941	11.7777	11.8469		#N/A
KREMEN1	ENSG00000183762	KREMEN1	-0.57786	0.0270863		8.91786	9.00586	9.87932	10.3032	9.70193	10.0303	9.46036	9.61342	9.44428	9.46184	9.33179	9.44438		#N/A
AURKC	ENSG00000105146	AURKC	2.23068	0.0272491		6.38804	5.70631	3.41478	4.42788	2.91018	2.74768	2.94326	3.57809	3.44293	3.22064	5.18848	5.05034		#N/A
MBD5	ENSG00000204406	MBD5	-0.340906	0.0273038		8.60749	8.52545	8.92412	8.76316	9.12549	8.90905	9.04238	9.14739	8.62261	8.60183	8.84085	8.68947		#N/A
MYOZ1	ENSG00000177791	MYOZ1	1.10996	0.0273038		6.80078	6.79482	5.22203	5.22976	5.00615	4.60719	5.35454	5.42063	5.44396	6.36632	5.36932	5.67226		#N/A
PTPRN	ENSG00000054356	PTPRN	2.69282	0.0274573		8.57725	8.66565	3.6518	5.34242	4.58076	6.19509	3.5088	4.24819	6.47698	6.99703	3.14892	4.32034		#N/A
MYH16	ENSG00000002079	MYH16	3.00715	0.0274573		6.95658	6.84408	3.53815	2.81715	2.91018	3.23767	3.62126	2.91269	3.55266	3.41312	3.39138	2.30448		#N/A
DQX1	ENSG00000144045	DQX1	1.62875	0.0274573		4.82131	3.77003	4.03364	3.71623	3.30185	2.42174	2.94326	3.68095	5.52697	4.66039	4.27957	4.45007		#N/A
ENSG00000279415	ENSG00000279415	ENSG00000279415	2.30936	0.0279557		5.08963	5.04121	2.77744	2.96525	2.91018	3.01338	2.75886	2.28764	4.21794	2.73574	3.01047	3.52595		#N/A
ZNF43	ENSG00000279566	ZNF43	-0.387463	0.0282681		9.22422	8.98953	9.47262	9.41547	9.53186	9.45553	9.78707	9.85529	9.15128	9.18678	9.36946	9.31836		#N/A
MYO1D	ENSG00000176658	MYO1D	0.45257	0.0283924		10.7398	10.7694	10.3796	10.3247	10.3359	10.4246	9.84032	9.8092	10.6484	10.6974	10.5094	10.569		#N/A
ENSG00000230423	ENSG00000230423	ENSG00000230423	-2.86194	0.0284925		2.3662	2.31157	2.30804	3.79753	2.91018	3.60277	4.36538	4.84356	2	2.41427	2.49142	2.95597		#N/A
MCTP1	ENSG00000175471	MCTP1	-0.865521	0.0286037		6.70813	6.60779	8.36049	8.43187	8.73488	8.37798	8.36532	8.07966	7.94953	7.96661	7.8735	7.58479		#N/A
ZNF768	ENSG00000169957	ZNF768	-0.467457	0.0287836		9.24635	9.11776	9.48417	9.36302	9.90434	9.81876	9.92904	9.72444	9.13152	9.03405	9.55369	9.36435		#N/A
SGCD	ENSG00000170624	SGCD	4.37282	0.0287836		3.10823	2.56766	2	2	2	2	2.75886	2	2.71767	2.41427	4.74018	5.00883		#N/A
ANKRD20A1	ENSG00000260691	ANKRD20A1	-1.56798	0.029204		2.3662	3.29064	5.10716	5.22976	5.20266	5.34592	5.91396	5.83171	4.67153	3.73482	4.94413	4.32034		#N/A
MTCO1P40	ENSG00000262902	MTCO1P40	2.04317	0.0294853		3.9596	2.56766	2.56175	2.81715	2.37082	2.74768	2.75886	2.91269	4.14973	4.31948	3.27524	4.25082		#N/A
PDCD1LG2	ENSG00000197646	PDCD1LG2	2.01966	0.0295151		5.18439	5.27473	2.77744	3.44059	3.60958	3.60277	2.2995	2.73285	4.40513	4.66039	3.5989	3.12092		#N/A
ACTG2	ENSG00000163017	ACTG2	1.93291	0.0296786		5.54736	6.27207	3.27987	5.07531	2.37082	4.43671	2.94326	4.24819	5.65551	6.29477	4.69569	4.73103		#N/A
TMEM145	ENSG00000167619	TMEM145	-3.66895	0.0298254		3.10823	2	2.56175	2.25154	6.90766	6.93264	2.75886	3.9517	3.55266	2.41427	3.14892	2.30448		#N/A
C11orf1	ENSG00000137720	C11ORF1	-0.521303	0.0303354		7.29064	7.17771	8.13963	8.1823	7.75621	7.8249	8.26934	8.17525	7.66187	7.61171	7.62924	7.87781		#N/A
PCDHGA11	ENSG00000253873	PCDHGA11	-1.69197	0.0303678		5.54736	5.53688	8.33944	8.24886	6.2161	6.27317	6.04071	6.02007	5.05391	4.49998	6.23698	6.20068		#N/A
OSBPL6	ENSG00000079156	OSBPL6	0.850568	0.0303895		7.68837	7.56327	5.95603	5.72145	6.5942	6.41769	6.53286	6.4127	6.89669	6.69749	6.8979	6.60063		#N/A
ISG20	ENSG00000172183	ISG20	1.23665	0.0306095		6.46556	6.32508	4.19232	5.10755	4.50829	5.08235	4.54721	4.31368	5.65551	5.27027	4.60237	5.50318		#N/A
PPP6R3	ENSG00000110075	PPP6R3	-0.179808	0.0307403		11.1041	11.0528	11.3722	11.253	11.2339	11.1755	11.2125	11.2887	11.0225	11.0612	11.0901	11.1371		#N/A
SMG1P4	ENSG00000185710	SMG1P4	-3.29932	0.0309019		2.90062	2	3.13102	3.33562	4.07861	3.60277	3.38682	2.52735	2	2	2.26653	2		#N/A
CLMP	ENSG00000166250	CLMP	1.28721	0.030997		7.32225	7.43248	4.93824	5.87917	5.41576	5.56869	6.34909	6.16906	5.65551	5.76975	7.29831	7.52714		#N/A
SLC16A3	ENSG00000141526	SLC16A3	1.73366	0.0313738		9.66107	9.74861	6.48687	6.49341	7.32125	7.79873	6.42852	6.22119	7.83475	7.72492	6.78563	6.96861		#N/A
TMEM181	ENSG00000146433	TMEM181	0.25615	0.0316463		10.1448	10.1692	9.73527	9.80646	9.83936	9.79469	9.84178	9.9119	9.99767	9.90984	10.0038	10.2146		#N/A
RAB31	ENSG00000168461	RAB31	1.22551	0.0319404		11.4138	11.4228	9.5571	10.0342	9.55453	10.0057	8.33265	8.74318	10.2838	10.6396	9.61171	9.96754		#N/A
NLRP1	ENSG00000091592	NLRP1	2.43791	0.0319428		5.89431	6.10022	4.03364	2.25154	3.74189	3.01338	2.2995	3.34737	4.97726	4.66039	3.01047	3.63911		#N/A
RAD51D	ENSG00000185379	RAD51D	0.408177	0.0320324		7.71243	7.9483	7.39028	7.37755	7.70038	7.22231	7.22701	7.20806	7.68615	7.66942	7.6758	7.85457		#N/A
TAF11L11	ENSG00000283740	TAF11L11	5.44148	0.0320324		3.2897	3.55015	2	2	2	2	2	2	3.83919	4.80473	2	2		#N/A
POGLUT2	ENSG00000134901	POGLUT2	-0.71045	0.0321033		7.2474	6.70433	8.05436	8.22334	8.31907	8.08513	8.51112	8.57976	7.73353	7.81291	7.89825	7.90635		#N/A
SOX15	ENSG00000129194	SOX15	1.55608	0.0321147		9.12915	9.00044	7.38207	8.2011	6.38752	6.83304	5.14475	6.13323	8.55499	8.70662	7.35663	7.45169		#N/A
LINC02728	ENSG00000251323	LINC02728	1.39195	0.0321208		4.24987	3.77003	3.27987	3.09955	2.91018	3.43174	4.23003	3.34737	4.62204	4.41255	4.64978	4.87661		#N/A
ZAP70	ENSG00000115085	ZAP70	1.41275	0.0321323		4.5637	5.53688	3.75714	4.08344	4.26609	5.19362	3.62126	3.07258	4.93736	5.31917	5.28173	5.89368		#N/A
FGD5	ENSG00000154783	FGD5	1.42925	0.0323066		6.17379	5.88171	4.89273	4.57349	4.89685	5.86609	4.36538	5.23025	7.44422	6.76964	5.47841	5.12995		#N/A
POU6F2	ENSG00000106536	POU6F2	0.83062	0.0323066		6.30612	6.39287	6.25475	6.18136	5.99527	5.8321	5.56604	5.35992	7.19628	7.12631	6.42587	6.39043		#N/A
FAP	ENSG00000078098	FAP	2.36775	0.0323066		4.63254	4.04746	3.41478	2.96525	2.66556	2	3.91402	2.28764	3.32417	3.58292	5.69731	5.27708		#N/A
COL3A1	ENSG00000168542	COL3A1	1.98629	0.0324133		11.692	11.6856	13.0263	13.2065	11.4841	11.7865	10.3171	10.2664	14.6584	14.7386	14.4302	14.5413		#N/A
DTX3L	ENSG00000163840	DTX3L	0.625461	0.0324753		9.5806	9.59339	8.58097	8.99195	8.62351	9.02266	8.78606	8.54609	9.53231	9.69044	8.71832	8.98805		#N/A
AKIRIN2	ENSG00000135334	AKIRIN2	-0.362722	0.0326824		9.57842	9.55322	10.0235	9.63596	10.0439	9.79027	10.0781	9.83592	9.46373	9.43436	9.78231	9.44438		#N/A
CLDN19	ENSG00000164007	CLDN19	-0.968472	0.0326824		4.49141	4.54132	5.86469	5.20016	5.6014	4.89749	5.97873	5.50717	4.57079	4.66039	5.34071	4.32034		CLDN19
APCDD1L	ENSG00000198768	APCDD1L	3.48646	0.0327473		5.08963	4.54132	2	2.46567	2	2	2.54738	2.52735	2.51569	3.41312	2.49142	2.7697		#N/A
DCT	ENSG00000080166	DCT	-4.96396	0.0327735		2	2	2.77744	3.44059	2	2	6.11942	5.83171	2	2.73574	2.49142	2		#N/A
C16orf87	ENSG00000155330	C16ORF87	-0.66405	0.0328212		9.03375	8.53299	10.2229	9.46608	9.8301	9.05985	9.6953	9.60527	9.33335	9.21935	9.08032	8.845		#N/A
ENSG00000272405	ENSG00000272405	ENSG00000272405	2.21017	0.0328212		9.44364	9.4985	5.71583	6.21134	6.87921	7.0258	4.42857	4.75202	7.25427	7.58196	5.57982	5.79944		#N/A
PAPSS2	ENSG00000198682	PAPSS2	1.87042	0.0328212		8.55525	8.84576	5.39521	4.74726	6.90766	6.91651	5.38672	5.35992	7.66798	7.79573	5.76347	5.67226		#N/A
LRRC6	ENSG00000129295	LRRC6	-0.861529	0.0328212		6.21926	5.90511	6.61852	6.26949	6.96294	6.48486	7.62116	7.21664	6.16771	5.87162	6.53091	5.84733		#N/A
SAMD15	ENSG00000100583	SAMD15	-0.989876	0.0328212		4.93469	5.20101	5.10716	5.5206	5.73442	5.56869	6.63016	6.39768	5.05391	4.99732	4.82525	5.12995		#N/A
JPH1	ENSG00000104369	JPH1	1.31712	0.0331466		6.42732	6.60779	6.42427	6.35254	6.28279	6.41769	6.33267	5.50717	6.96775	6.64092	8.29858	8.55893		#N/A
PID1	ENSG00000153823	PID1	2.50011	0.0331515		5.92208	6.28996	3.94723	4.26592	2.37082	3.01338	2.2995	2.91269	4.97726	5.41226	3.78029	2.7697		#N/A
KRT18	ENSG00000111057	KRT18	1.03793	0.0333608		15.1618	15.1728	13.7044	14.4442	13.5576	14.224	12.7233	13.0951	14.8394	14.9817	13.8343	14.2276		#N/A
ENSG00000205890	ENSG00000205890	ENSG00000205890	0.927912	0.0337702		5.89431	5.23834	4.84573	4.78762	4.89685	5.34592	4.36538	4.43637	5.88263	4.80473	5.82673	5.7499		#N/A
HLA-DRB1	ENSG00000228080	HLA-DRB1	-2.3762	0.0337867		4.24987	3.14098	4.93824	5.25876	4.50829	5.8321	3.72559	3.9517	2	2	2.8573	3.40316		#N/A
H3-3A	ENSG00000163041	H3-3A	-0.379265	0.0338511		10.9415	10.9734	11.4597	11.5248	11.0531	11.0406	11.3777	11.3529	10.7655	10.7827	11.052	11.0681		#N/A
KISS1	ENSG00000170498	KISS1	3.06166	0.033942		5.35706	5.41175	2.56175	3.87449	2.37082	2.42174	2.2995	2	5.16174	4.99732	2.49142	2.55576		#N/A
HLA-B	ENSG00000206450	HLA-B	1.56108	0.0340244		10.2264	10.3538	8.25203	8.91662	8.17435	9.26486	7.45658	7.6934	10.4177	10.718	7.68721	8.27362		#N/A
TSPYL5	ENSG00000180543	TSPYL5	-1.01159	0.0340244		7.34294	6.8681	9.13182	8.70903	9.22776	8.80775	8.96457	8.7755	7.50008	7.59195	8.73491	8.64951		#N/A
MCF2L	ENSG00000126217	MCF2L	-1.34621	0.0350229		6.15051	6.05909	7.14061	6.8485	8.57555	8.14865	9.03732	8.90598	7.45839	6.71587	7.58113	7.33056		#N/A
GOLGA6L5P	ENSG00000230373	GOLGA6L5P	0.762076	0.0350229		6.6261	6.87996	5.39521	5.74213	5.99527	5.72504	6.15723	5.71536	6.54495	6.88781	6.01956	5.96053		#N/A
SELENOW	ENSG00000178980	SELENOW	0.51027	0.0351637		10.6892	10.972	9.89816	10.0561	9.84489	10.1847	9.88466	10.0102	10.2567	10.4482	10.0955	10.316		#N/A
P4HA2	ENSG00000072682	P4HA2	1.32269	0.0351637		9.91015	10.0404	8.08504	7.87098	8.20333	8.20949	7.41037	7.46745	9.21525	9.18349	7.78601	7.33896		#N/A
TIAM2	ENSG00000146426	TIAM2	1.30127	0.0351637		9.47443	9.52517	7.23482	7.5161	7.22278	8.04859	7.16342	6.93384	8.45254	8.4781	7.41268	7.08304		#N/A
TRIM6	ENSG00000121236	TRIM6	0.911712	0.0351637		9.77774	9.4356	8.8397	8.19361	8.85298	8.1137	7.76887	7.56481	9.26042	9.02671	8.95379	8.43903		#N/A
NTNG1	ENSG00000162631	NTNG1	1.64496	0.0351637		8.19453	8.0304	5.18475	5.76253	6.2161	6.3711	4.60306	5.16076	7.02599	7.08449	5.34071	5.5902		#N/A
SERPINA1	ENSG00000277377	SERPINA1	3.13116	0.0351637		6.44657	6.74381	3.41478	3.53844	2	3.23767	3.10674	2	4.07814	2.99847	3.39138	3.12092		#N/A
CLTB	ENSG00000175416	CLTB	1.51099	0.035258		11.2625	11.5737	8.86937	9.41547	8.84565	9.46388	8.2166	8.44376	9.82526	10.1331	8.41636	9.02756		#N/A
ENSG00000287737	ENSG00000287737	ENSG00000287737	1.13078	0.0354046		4.87912	5.73271	4.40176	3.87449	3.74189	3.89388	4.42857	4.03173	4.97726	4.66039	5.18848	4.25082		#N/A
RALGAPA1	ENSG00000174373	RALGAPA1	-0.317091	0.0360186		8.74209	8.59546	9.24254	9.01975	9.14354	9.05249	9.06989	9.12019	9.03555	8.84663	8.66739	8.84205		#N/A
GPHN	ENSG00000171723	GPHN	-0.388302	0.0360186		8.11857	7.71663	8.33944	8.21597	8.59754	8.41289	8.37738	8.19711	8.0085	7.80435	8.16216	7.98873		#N/A
PDIK1L	ENSG00000175087	PDIK1L	-0.820193	0.0363649		6.42732	6.96035	7.9019	7.97512	8.27607	7.79873	8.52564	8.50462	7.25427	7.88776	7.61737	7.70663		#N/A
FRAS1	ENSG00000138759	FRAS1	0.490392	0.0364505		11.7493	11.8071	11.5618	11.3851	11.3914	11.4792	11.2159	11.1135	12.1701	12.1909	11.5565	11.5078		#N/A
PIK3CD	ENSG00000171608	PIK3CD	1.45782	0.0364505		9.84637	10.1932	7.97469	8.24524	7.50938	8.33007	6.98574	6.64672	8.7916	9.07733	7.90803	7.45169		#N/A
CDH7	ENSG00000081138	CDH7	-1.82682	0.0364505		4.82131	3.29064	5.54982	4.93862	6.69559	6.02498	7.83451	7.33177	5.38585	3.9977	5.90698	5.31163		#N/A
FKBP1A	ENSG00000088832	FKBP1A	1.30049	0.0365617		12.8979	13.0183	10.7359	10.9071	10.7307	10.901	10.3532	10.5293	11.3586	11.5432	10.5607	10.6472		#N/A
TMEM64	ENSG00000180694	TMEM64	0.522976	0.0368206		8.59029	8.66565	7.88457	7.88034	8.25407	7.91695	7.88607	7.38606	8.14615	8.25122	8.47018	8.21093		#N/A
NCOA2	ENSG00000140396	NCOA2	-0.437719	0.0368802		10.0738	9.77901	10.4322	10.372	10.5574	10.1316	10.6234	10.6138	10.1407	9.67173	10.237	10.1765		#N/A
SYT10	ENSG00000110975	SYT10	-1.00492	0.0369414		6.95658	6.79482	8.80326	8.71165	8.57997	8.12778	9.26645	9.27618	8.40213	8.36038	7.8884	7.97263		#N/A
CHST2	ENSG00000175040	CHST2	1.83644	0.0369414		7.03496	7.53354	4.6948	3.87449	4.89685	5.48366	4.65683	5.12472	3.44293	5.11277	6.38442	6.85606		#N/A
HTR1D	ENSG00000179546	HTR1D	2.17789	0.0369414		6.84497	6.97148	3.6518	4.42788	3.86308	4.43671	3.25356	3.9517	5.12669	5.66014	3.69244	2.95597		#N/A
ZNF738	ENSG00000172687	ZNF738	-0.509602	0.0370439		8.57287	8.57736	9.20346	9.13958	9.435	9.18967	9.71761	9.5822	8.88896	8.90786	9.15821	9.1133		#N/A
ALDH1B1	ENSG00000137124	ALDH1B1	0.801007	0.0371171		9.30289	9.60773	8.02829	7.67514	8.49814	8.36615	8.51112	7.92584	8.65064	9.10548	8.51888	8.34207		#N/A
CCDC173	ENSG00000154479	CCDC173	-1.35931	0.0371171		3.10823	4.28005	3.94723	5.36926	5.37558	5.68751	5.35454	5.66606	3.65462	3.9977	4.86598	4.45007		#N/A
LINC01876	ENSG00000226383	LINC01876	1.02756	0.037413		6.72399	6.48892	6.42427	6.40537	6.66258	6.29828	4.89918	5.3906	7.24613	7.34279	7.54397	7.1029		#N/A
CALHM5	ENSG00000178033	CALHM5	1.4655	0.0376571		4.76109	4.54132	3.41478	3.22241	3.60958	2.42174	2.75886	3.34737	3.83919	3.73482	3.9414	4.01957		#N/A
SCG3	ENSG00000104112	SCG3	1.57493	0.0380262		5.89431	6.10022	6.39193	6.70837	5.05785	5.34592	4.60306	4.70398	6.91735	7.13998	8.11648	7.77632		#N/A
[truncated: 60,041 more rows]

## Sheet: tight junction gene DEGs
		imatinib						genotype
[truncated: 168 more rows]

## Sheet: KEGG tight junction genes
omo sapiens (human) [GN:hsa]
[truncated: 169 more rows]
