# Supplementary material for: Inhibition of Abl Kinase by Imatinib Can Rescue the Compromised Barrier Function of 22q11.2DS Patient-iPSC-Derived Blood–Brain Barriers
Source: Cells. 2023 Jan 27;12(3):422. doi: 10.3390/cells12030422 (PMC9913366; doi:10.3390/cells12030422)
Supplement: Supplementary file 1 [file cells-12-00422-s001.zip › Table S2_GO_enrichment_genotype.xlsx]

## Sheet: GO_enrichment_genotype.csv
	Table S2 Geneset enrichment analysis of DEGs between 22q11.2DS and control
		group	FDR	nGenes	Pathway.size	Fold.enriched	Pathway	URL	Genes
	1	Upregulated	3.47e-14	88	1639	2.626	Cell adhesion	http://amigo.geneontology.org/amigo/term/GO:0007155	ENSG00000008517, ENSG00000011422, ENSG00000019549, ENSG00000026508, ENSG00000041982, ENSG00000058085, ENSG00000062038, ENSG00000065320, ENSG00000070404, ENSG00000072110, ENSG00000072163, ENSG00000073008, ENSG00000074590, ENSG00000076706, ENSG00000078098, ENSG00000082293, ENSG00000084636, ENSG00000087303, ENSG00000089327, ENSG00000091986, ENSG00000092969, ENSG00000101335, ENSG00000104332, ENSG0000…
	2	Upregulated	3.47e-14	88	1646	2.61721	Biological adhesion	http://amigo.geneontology.org/amigo/term/GO:0022610	ENSG00000008517, ENSG00000011422, ENSG00000019549, ENSG00000026508, ENSG00000041982, ENSG00000058085, ENSG00000062038, ENSG00000065320, ENSG00000070404, ENSG00000072110, ENSG00000072163, ENSG00000073008, ENSG00000074590, ENSG00000076706, ENSG00000078098, ENSG00000082293, ENSG00000084636, ENSG00000087303, ENSG00000089327, ENSG00000091986, ENSG00000092969, ENSG00000101335, ENSG00000104332, ENSG0000…
	3	Upregulated	3.95e-12	42	450	4.15794	Extracellular matrix organization	http://amigo.geneontology.org/amigo/term/GO:0030198	ENSG00000008517, ENSG00000011422, ENSG00000019549, ENSG00000026508, ENSG00000041982, ENSG00000058085, ENSG00000062038, ENSG00000065320, ENSG00000070404, ENSG00000072110, ENSG00000072163, ENSG00000073008, ENSG00000074590, ENSG00000076706, ENSG00000078098, ENSG00000082293, ENSG00000084636, ENSG00000087303, ENSG00000089327, ENSG00000091986, ENSG00000092969, ENSG00000101335, ENSG00000104332, ENSG0000…
	4	Upregulated	3.95e-12	42	451	4.14639	Extracellular structure organization	http://amigo.geneontology.org/amigo/term/GO:0043062	ENSG00000008517, ENSG00000011422, ENSG00000019549, ENSG00000026508, ENSG00000041982, ENSG00000058085, ENSG00000062038, ENSG00000065320, ENSG00000070404, ENSG00000072110, ENSG00000072163, ENSG00000073008, ENSG00000074590, ENSG00000076706, ENSG00000078098, ENSG00000082293, ENSG00000084636, ENSG00000087303, ENSG00000089327, ENSG00000091986, ENSG00000092969, ENSG00000101335, ENSG00000104332, ENSG0000…
	5	Upregulated	3.95e-12	42	454	4.1349	External encapsulating structure organization	http://amigo.geneontology.org/amigo/term/GO:0045229	ENSG00000008517, ENSG00000011422, ENSG00000019549, ENSG00000026508, ENSG00000041982, ENSG00000058085, ENSG00000062038, ENSG00000065320, ENSG00000070404, ENSG00000072110, ENSG00000072163, ENSG00000073008, ENSG00000074590, ENSG00000076706, ENSG00000078098, ENSG00000082293, ENSG00000084636, ENSG00000087303, ENSG00000089327, ENSG00000091986, ENSG00000092969, ENSG00000101335, ENSG00000104332, ENSG0000…
	6	Upregulated	1.1e-08	118	2871	1.80766	Anatomical structure morphogenesis	http://amigo.geneontology.org/amigo/term/GO:0009653	ENSG00000008517, ENSG00000011422, ENSG00000019549, ENSG00000026508, ENSG00000041982, ENSG00000058085, ENSG00000062038, ENSG00000065320, ENSG00000070404, ENSG00000072110, ENSG00000072163, ENSG00000073008, ENSG00000074590, ENSG00000076706, ENSG00000078098, ENSG00000082293, ENSG00000084636, ENSG00000087303, ENSG00000089327, ENSG00000091986, ENSG00000092969, ENSG00000101335, ENSG00000104332, ENSG0000…
	7	Upregulated	2.14e-08	54	1000	2.67296	Cell-cell adhesion	http://amigo.geneontology.org/amigo/term/GO:0098609	ENSG00000008517, ENSG00000011422, ENSG00000019549, ENSG00000026508, ENSG00000041982, ENSG00000058085, ENSG00000062038, ENSG00000065320, ENSG00000070404, ENSG00000072110, ENSG00000072163, ENSG00000073008, ENSG00000074590, ENSG00000076706, ENSG00000078098, ENSG00000082293, ENSG00000084636, ENSG00000087303, ENSG00000089327, ENSG00000091986, ENSG00000092969, ENSG00000101335, ENSG00000104332, ENSG0000…
	8	Upregulated	5.4e-07	45	837	2.72457	Regulation of cell adhesion	http://amigo.geneontology.org/amigo/term/GO:0030155	ENSG00000008517, ENSG00000011422, ENSG00000019549, ENSG00000026508, ENSG00000041982, ENSG00000058085, ENSG00000062038, ENSG00000065320, ENSG00000070404, ENSG00000072110, ENSG00000072163, ENSG00000073008, ENSG00000074590, ENSG00000076706, ENSG00000078098, ENSG00000082293, ENSG00000084636, ENSG00000087303, ENSG00000089327, ENSG00000091986, ENSG00000092969, ENSG00000101335, ENSG00000104332, ENSG0000…
	9	Upregulated	1.69e-06	71	1590	2.05152	Cell migration	http://amigo.geneontology.org/amigo/term/GO:0016477	ENSG00000008517, ENSG00000011422, ENSG00000019549, ENSG00000026508, ENSG00000041982, ENSG00000058085, ENSG00000062038, ENSG00000065320, ENSG00000070404, ENSG00000072110, ENSG00000072163, ENSG00000073008, ENSG00000074590, ENSG00000076706, ENSG00000078098, ENSG00000082293, ENSG00000084636, ENSG00000087303, ENSG00000089327, ENSG00000091986, ENSG00000092969, ENSG00000101335, ENSG00000104332, ENSG0000…
	10	Upregulated	2.38e-06	82	1982	1.90354	Locomotion	http://amigo.geneontology.org/amigo/term/GO:0040011	ENSG00000008517, ENSG00000011422, ENSG00000019549, ENSG00000026508, ENSG00000041982, ENSG00000058085, ENSG00000062038, ENSG00000065320, ENSG00000070404, ENSG00000072110, ENSG00000072163, ENSG00000073008, ENSG00000074590, ENSG00000076706, ENSG00000078098, ENSG00000082293, ENSG00000084636, ENSG00000087303, ENSG00000089327, ENSG00000091986, ENSG00000092969, ENSG00000101335, ENSG00000104332, ENSG0000…
	11	Downregulated	0.000286	17	285	4.8493	Cell-cell adhesion via plasma-membrane adhesion molecules	http://amigo.geneontology.org/amigo/term/GO:0098742	ENSG00000009694, ENSG00000081138, ENSG00000099889, ENSG00000120322, ENSG00000121871, ENSG00000138347, ENSG00000150275, ENSG00000152208, ENSG00000164007, ENSG00000165323, ENSG00000179915, ENSG00000188404, ENSG00000204967, ENSG00000244486, ENSG00000253873, ENSG00000254245, ENSG00000272674
	12	Downregulated	0.0148	27	1000	2.5208	Cell-cell adhesion	http://amigo.geneontology.org/amigo/term/GO:0098609	ENSG00000009694, ENSG00000081138, ENSG00000099889, ENSG00000120322, ENSG00000121871, ENSG00000138347, ENSG00000150275, ENSG00000152208, ENSG00000164007, ENSG00000165323, ENSG00000179915, ENSG00000188404, ENSG00000204967, ENSG00000244486, ENSG00000253873, ENSG00000254245, ENSG00000272674
	13	Downregulated	0.0297	36	1639	2.02623	Cell adhesion	http://amigo.geneontology.org/amigo/term/GO:0007155	ENSG00000009694, ENSG00000081138, ENSG00000099889, ENSG00000120322, ENSG00000121871, ENSG00000138347, ENSG00000150275, ENSG00000152208, ENSG00000164007, ENSG00000165323, ENSG00000179915, ENSG00000188404, ENSG00000204967, ENSG00000244486, ENSG00000253873, ENSG00000254245, ENSG00000272674
	14	Downregulated	0.0297	36	1646	2.01945	Biological adhesion	http://amigo.geneontology.org/amigo/term/GO:0022610	ENSG00000009694, ENSG00000081138, ENSG00000099889, ENSG00000120322, ENSG00000121871, ENSG00000138347, ENSG00000150275, ENSG00000152208, ENSG00000164007, ENSG00000165323, ENSG00000179915, ENSG00000188404, ENSG00000204967, ENSG00000244486, ENSG00000253873, ENSG00000254245, ENSG00000272674
