# Supplementary material for: Inhibition of Abl Kinase by Imatinib Can Rescue the Compromised Barrier Function of 22q11.2DS Patient-iPSC-Derived Blood–Brain Barriers
Source: Cells. 2023 Jan 27;12(3):422. doi: 10.3390/cells12030422 (PMC9913366; doi:10.3390/cells12030422)
Supplement: Supplementary file 1 [file cells-12-00422-s001.zip › Table S3_GO_enrichment_imatinib.xlsx]

## Sheet: enrichment(1)
	Table S3 Geneset enrichment analysis of DEGs with imatinib treatment
		group	FDR	nGenes	Pathway.size	Fold.enriched	Pathway	URL	Genes
	1	Upregulated	0.000326	69	1537	1.90252	Negative regulation of cell communication	http://amigo.geneontology.org/amigo/term/GO:0010648	ENSG00000008405, ENSG00000014123, ENSG00000018408, ENSG00000040199, ENSG00000070444, ENSG00000086061, ENSG00000090432, ENSG00000096717, ENSG00000099250, ENSG00000104142, ENSG00000106003, ENSG00000106829, ENSG00000107816, ENSG00000108861, ENSG00000109321, ENSG00000112658, ENSG00000113161, ENSG00000113575, ENSG00000113645, ENSG00000114423, ENSG00000116688, ENSG00000116761, ENSG00000119048, ENSG0000…
	2	Upregulated	0.000326	69	1540	1.89936	Negative regulation of signaling	http://amigo.geneontology.org/amigo/term/GO:0023057	ENSG00000008405, ENSG00000014123, ENSG00000018408, ENSG00000040199, ENSG00000070444, ENSG00000086061, ENSG00000090432, ENSG00000096717, ENSG00000099250, ENSG00000104142, ENSG00000106003, ENSG00000106829, ENSG00000107816, ENSG00000108861, ENSG00000109321, ENSG00000112658, ENSG00000113161, ENSG00000113575, ENSG00000113645, ENSG00000114423, ENSG00000116688, ENSG00000116761, ENSG00000119048, ENSG0000…
	3	Upregulated	0.000429	148	4393	1.4291	Regulation of nucleobase-containing compound metabolic process	http://amigo.geneontology.org/amigo/term/GO:0019219	ENSG00000008405, ENSG00000014123, ENSG00000018408, ENSG00000040199, ENSG00000070444, ENSG00000086061, ENSG00000090432, ENSG00000096717, ENSG00000099250, ENSG00000104142, ENSG00000106003, ENSG00000106829, ENSG00000107816, ENSG00000108861, ENSG00000109321, ENSG00000112658, ENSG00000113161, ENSG00000113575, ENSG00000113645, ENSG00000114423, ENSG00000116688, ENSG00000116761, ENSG00000119048, ENSG0000…
	4	Upregulated	0.000429	146	4707	1.43738	Regulation of response to stimulus	http://amigo.geneontology.org/amigo/term/GO:0048583	ENSG00000008405, ENSG00000014123, ENSG00000018408, ENSG00000040199, ENSG00000070444, ENSG00000086061, ENSG00000090432, ENSG00000096717, ENSG00000099250, ENSG00000104142, ENSG00000106003, ENSG00000106829, ENSG00000107816, ENSG00000108861, ENSG00000109321, ENSG00000112658, ENSG00000113161, ENSG00000113575, ENSG00000113645, ENSG00000114423, ENSG00000116688, ENSG00000116761, ENSG00000119048, ENSG0000…
	5	Upregulated	0.000429	101	2690	1.61277	Regulation of developmental process	http://amigo.geneontology.org/amigo/term/GO:0050793	ENSG00000008405, ENSG00000014123, ENSG00000018408, ENSG00000040199, ENSG00000070444, ENSG00000086061, ENSG00000090432, ENSG00000096717, ENSG00000099250, ENSG00000104142, ENSG00000106003, ENSG00000106829, ENSG00000107816, ENSG00000108861, ENSG00000109321, ENSG00000112658, ENSG00000113161, ENSG00000113575, ENSG00000113645, ENSG00000114423, ENSG00000116688, ENSG00000116761, ENSG00000119048, ENSG0000…
	6	Upregulated	0.000429	140	4088	1.45786	Regulation of RNA metabolic process	http://amigo.geneontology.org/amigo/term/GO:0051252	ENSG00000008405, ENSG00000014123, ENSG00000018408, ENSG00000040199, ENSG00000070444, ENSG00000086061, ENSG00000090432, ENSG00000096717, ENSG00000099250, ENSG00000104142, ENSG00000106003, ENSG00000106829, ENSG00000107816, ENSG00000108861, ENSG00000109321, ENSG00000112658, ENSG00000113161, ENSG00000113575, ENSG00000113645, ENSG00000114423, ENSG00000116688, ENSG00000116761, ENSG00000119048, ENSG0000…
	7	Upregulated	0.000477	83	2019	1.69459	Phosphorylation	http://amigo.geneontology.org/amigo/term/GO:0016310	ENSG00000008405, ENSG00000014123, ENSG00000018408, ENSG00000040199, ENSG00000070444, ENSG00000086061, ENSG00000090432, ENSG00000096717, ENSG00000099250, ENSG00000104142, ENSG00000106003, ENSG00000106829, ENSG00000107816, ENSG00000108861, ENSG00000109321, ENSG00000112658, ENSG00000113161, ENSG00000113575, ENSG00000113645, ENSG00000114423, ENSG00000116688, ENSG00000116761, ENSG00000119048, ENSG0000…
	8	Upregulated	0.000477	112	3033	1.54151	Intracellular signal transduction	http://amigo.geneontology.org/amigo/term/GO:0035556	ENSG00000008405, ENSG00000014123, ENSG00000018408, ENSG00000040199, ENSG00000070444, ENSG00000086061, ENSG00000090432, ENSG00000096717, ENSG00000099250, ENSG00000104142, ENSG00000106003, ENSG00000106829, ENSG00000107816, ENSG00000108861, ENSG00000109321, ENSG00000112658, ENSG00000113161, ENSG00000113575, ENSG00000113645, ENSG00000114423, ENSG00000116688, ENSG00000116761, ENSG00000119048, ENSG0000…
	9	Upregulated	0.000587	146	4310	1.41555	Cellular protein modification process	http://amigo.geneontology.org/amigo/term/GO:0006464	ENSG00000008405, ENSG00000014123, ENSG00000018408, ENSG00000040199, ENSG00000070444, ENSG00000086061, ENSG00000090432, ENSG00000096717, ENSG00000099250, ENSG00000104142, ENSG00000106003, ENSG00000106829, ENSG00000107816, ENSG00000108861, ENSG00000109321, ENSG00000112658, ENSG00000113161, ENSG00000113575, ENSG00000113645, ENSG00000114423, ENSG00000116688, ENSG00000116761, ENSG00000119048, ENSG0000…
	10	Upregulated	0.000587	146	4310	1.41555	Protein modification process	http://amigo.geneontology.org/amigo/term/GO:0036211	ENSG00000008405, ENSG00000014123, ENSG00000018408, ENSG00000040199, ENSG00000070444, ENSG00000086061, ENSG00000090432, ENSG00000096717, ENSG00000099250, ENSG00000104142, ENSG00000106003, ENSG00000106829, ENSG00000107816, ENSG00000108861, ENSG00000109321, ENSG00000112658, ENSG00000113161, ENSG00000113575, ENSG00000113645, ENSG00000114423, ENSG00000116688, ENSG00000116761, ENSG00000119048, ENSG0000…
	11	Downregulated	3.82e-13	28	211	7.34428	Mitotic spindle organization	http://amigo.geneontology.org/amigo/term/GO:0007052	ENSG00000013810, ENSG00000037042, ENSG00000040275, ENSG00000074054, ENSG00000080986, ENSG00000087586, ENSG00000088325, ENSG00000112742, ENSG00000115163, ENSG00000117399, ENSG00000117650, ENSG00000117724, ENSG00000121957, ENSG00000126787, ENSG00000134057, ENSG00000134222, ENSG00000138778, ENSG00000149503, ENSG00000156970, ENSG00000161800, ENSG00000163322, ENSG00000163535, ENSG00000163946, ENSG0000…
	12	Downregulated	1.71e-12	30	274	6.11301	Spindle organization	http://amigo.geneontology.org/amigo/term/GO:0007051	ENSG00000013810, ENSG00000037042, ENSG00000040275, ENSG00000074054, ENSG00000080986, ENSG00000087586, ENSG00000088325, ENSG00000112742, ENSG00000115163, ENSG00000117399, ENSG00000117650, ENSG00000117724, ENSG00000121957, ENSG00000126787, ENSG00000134057, ENSG00000134222, ENSG00000138778, ENSG00000149503, ENSG00000156970, ENSG00000161800, ENSG00000163322, ENSG00000163535, ENSG00000163946, ENSG0000…
	13	Downregulated	1.71e-12	28	231	6.73524	Microtubule cytoskeleton organization involved in mitosis	http://amigo.geneontology.org/amigo/term/GO:1902850	ENSG00000013810, ENSG00000037042, ENSG00000040275, ENSG00000074054, ENSG00000080986, ENSG00000087586, ENSG00000088325, ENSG00000112742, ENSG00000115163, ENSG00000117399, ENSG00000117650, ENSG00000117724, ENSG00000121957, ENSG00000126787, ENSG00000134057, ENSG00000134222, ENSG00000138778, ENSG00000149503, ENSG00000156970, ENSG00000161800, ENSG00000163322, ENSG00000163535, ENSG00000163946, ENSG0000…
	14	Downregulated	1.52e-09	42	705	3.44607	Microtubule cytoskeleton organization	http://amigo.geneontology.org/amigo/term/GO:0000226	ENSG00000013810, ENSG00000037042, ENSG00000040275, ENSG00000074054, ENSG00000080986, ENSG00000087586, ENSG00000088325, ENSG00000112742, ENSG00000115163, ENSG00000117399, ENSG00000117650, ENSG00000117724, ENSG00000121957, ENSG00000126787, ENSG00000134057, ENSG00000134222, ENSG00000138778, ENSG00000149503, ENSG00000156970, ENSG00000161800, ENSG00000163322, ENSG00000163535, ENSG00000163946, ENSG0000…
	15	Downregulated	2.09e-09	30	369	4.59425	Mitotic nuclear division	http://amigo.geneontology.org/amigo/term/GO:0140014	ENSG00000013810, ENSG00000037042, ENSG00000040275, ENSG00000074054, ENSG00000080986, ENSG00000087586, ENSG00000088325, ENSG00000112742, ENSG00000115163, ENSG00000117399, ENSG00000117650, ENSG00000117724, ENSG00000121957, ENSG00000126787, ENSG00000134057, ENSG00000134222, ENSG00000138778, ENSG00000149503, ENSG00000156970, ENSG00000161800, ENSG00000163322, ENSG00000163535, ENSG00000163946, ENSG0000…
	16	Downregulated	2.88e-09	22	196	6.34418	Mitotic sister chromatid segregation	http://amigo.geneontology.org/amigo/term/GO:0000070	ENSG00000013810, ENSG00000037042, ENSG00000040275, ENSG00000074054, ENSG00000080986, ENSG00000087586, ENSG00000088325, ENSG00000112742, ENSG00000115163, ENSG00000117399, ENSG00000117650, ENSG00000117724, ENSG00000121957, ENSG00000126787, ENSG00000134057, ENSG00000134222, ENSG00000138778, ENSG00000149503, ENSG00000156970, ENSG00000161800, ENSG00000163322, ENSG00000163535, ENSG00000163946, ENSG0000…
	17	Downregulated	4.04e-09	45	889	3.1166	Regulation of cell cycle process	http://amigo.geneontology.org/amigo/term/GO:0010564	ENSG00000013810, ENSG00000037042, ENSG00000040275, ENSG00000074054, ENSG00000080986, ENSG00000087586, ENSG00000088325, ENSG00000112742, ENSG00000115163, ENSG00000117399, ENSG00000117650, ENSG00000117724, ENSG00000121957, ENSG00000126787, ENSG00000134057, ENSG00000134222, ENSG00000138778, ENSG00000149503, ENSG00000156970, ENSG00000161800, ENSG00000163322, ENSG00000163535, ENSG00000163946, ENSG0000…
	18	Downregulated	4.9e-09	49	978	2.90068	Microtubule-based process	http://amigo.geneontology.org/amigo/term/GO:0007017	ENSG00000013810, ENSG00000037042, ENSG00000040275, ENSG00000074054, ENSG00000080986, ENSG00000087586, ENSG00000088325, ENSG00000112742, ENSG00000115163, ENSG00000117399, ENSG00000117650, ENSG00000117724, ENSG00000121957, ENSG00000126787, ENSG00000134057, ENSG00000134222, ENSG00000138778, ENSG00000149503, ENSG00000156970, ENSG00000161800, ENSG00000163322, ENSG00000163535, ENSG00000163946, ENSG0000…
	19	Downregulated	6.29e-09	50	1021	2.83075	Mitotic cell cycle process	http://amigo.geneontology.org/amigo/term/GO:1903047	ENSG00000013810, ENSG00000037042, ENSG00000040275, ENSG00000074054, ENSG00000080986, ENSG00000087586, ENSG00000088325, ENSG00000112742, ENSG00000115163, ENSG00000117399, ENSG00000117650, ENSG00000117724, ENSG00000121957, ENSG00000126787, ENSG00000134057, ENSG00000134222, ENSG00000138778, ENSG00000149503, ENSG00000156970, ENSG00000161800, ENSG00000163322, ENSG00000163535, ENSG00000163946, ENSG0000…
	20	Downregulated	2.41e-08	22	225	5.56336	Sister chromatid segregation	http://amigo.geneontology.org/amigo/term/GO:0000819	ENSG00000013810, ENSG00000037042, ENSG00000040275, ENSG00000074054, ENSG00000080986, ENSG00000087586, ENSG00000088325, ENSG00000112742, ENSG00000115163, ENSG00000117399, ENSG00000117650, ENSG00000117724, ENSG00000121957, ENSG00000126787, ENSG00000134057, ENSG00000134222, ENSG00000138778, ENSG00000149503, ENSG00000156970, ENSG00000161800, ENSG00000163322, ENSG00000163535, ENSG00000163946, ENSG0000…
